# Supplementary material for: Escherichia coli achieves faster growth by increasing catalytic and translation rates of proteins
Source: Royal Society of Chemistry journal article supplement (doi:10.1039/c3mb70119k), 2013-06-10
Supplement: c3mb70119k.xlsx [file c3mb70119k.xlsx]

## Sheet: Table S1
Table S1. Various experimental results used in calculations determined in A-stat experiments with Escherichia coliK-12 MG1655 at different μ. Cell volumes were calculated from average biomass concentration and cell count from two independent A-stats. DCW, dry cell weight; CFU, colony forming unit; iBAQ % from Lowry, percentage of sum of all quantified proteins by iBAQ from cellular total protein …
Parameter	Unit	μ=0.11 h-1	μ=0.21 h-1	μ=0.31 h-1	μ=0.40 h-1	μ=0.49 h-1
RNA % in DCW	%	6.69303	8.09333	9.3536	10.7539	11.8741
Protein % in DCW	%	60.9684	58.1815	55.3946	52.8864	50.3782
Biomass concentration	gDCW L-1	1.87 ± 0.09	1.83 ± 0.03	1.83 ± 0.04	1.88 ± 0.01	1.81 ± 0.02
Cell counts	CFU ml-1	(8.6±0.4)×109	(6.7±0.1)×109	(5.0±0.1)×109	(4.3±0.0)×109	(3.6±0.0)×109
Cell volume	fL	0.7259	0.908955	1.22405	1.45655	1.69123
iBAQ % from Lowry	%	91.9718	85.4462	89.2914	88.422	94.366

## Sheet: Table S2
Table S2. Complete gene-specific data set of absolute and relative mRNA, protein and specific flux values, nATP, covariance values and other parameters used in calculations. Gene names together with alternative names are given. Specific flux rates are shown for genes associated with catalyzing the fluxes, according to the EcoCyc database,2 calculated previously by metabolic flux analysis.6 Relati…
		μ (h-1)	0.11	0.21	0.31	0.4	0.48	0.11	0.21	0.31	0.4	0.48	0.11	0.21	0.31	0.4	0.48	0.11	0.21	0.31	0.4	0.49	0.11	0.21	0.31	0.4	0.49	0.11	0.21	0.31	0.4	0.49	0.11	0.21	0.31	0.4	0.49	0.11	0.21	0.31	0.4	0.49	0.11	0.21	0.31	0.4	0.49	0.11	0.21
		Unit	molecules/cell	molecules/cell	molecules/cell	molecules/cell	molecules/cell	molecules/fL	molecules/fL	molecules/fL	molecules/fL	molecules/fL	unitless	unitless	unitless	unitless	unitless	molecules/cell	molecules/cell	molecules/cell	molecules/cell	molecules/cell	molecules/fL	molecules/fL	molecules/fL	molecules/fL	molecules/fL	unitless	unitless	unitless	unitless	unitless	mmol gDCW-1 h-1	mmol gDCW-1 h-1	mmol gDCW-1 h-1	mmol gDCW-1 h-1	mmol gDCW-1 h-1	unitless	unitless	unitless	unitless	unitless	unitless	unitless	unitless	unitless	unitless	s-1	s-1
KEGG ID	Gene name	Definition	mRNA abun.	mRNA abun.	mRNA abun.	mRNA abun.	mRNA abun.	mRNA conc.	mRNA conc.	mRNA conc.	mRNA conc.	mRNA conc.	Rel. mRNA	Rel. mRNA	Rel. mRNA	Rel. mRNA	Rel. mRNA	Protein abun.	Protein abun.	Protein abun.	Protein abun.	Protein abun.	Protein conc.	Protein conc.	Protein conc.	Protein conc.	Protein conc.	Rel. protein	Rel. protein	Rel. protein	Rel. protein	Rel. protein	Specific flux rate	Specific flux rate	Specific flux rate	Specific flux rate	Specific flux rate	Rel. flux	Rel. flux	Rel. flux	Rel. flux	Rel. flux	pm	pm	pm	pm	pm	kapp	kapp
b0002	thra, eck0002, hs, jw0001, thra1, thra2, thrd	fused aspartokinase i and homoserine dehydrogenase i (ec:2,7,2,4	0.64	2.368	2.765	4.828	8.346	0.890957	2.61055	2.41457	3.41667	4.90043	1	2.93005	2.71008	3.83484	5.50019	932	1529	2452	4404	5102	1283.92	1682.15	2003.18	3023.58	3016.75	1	1.31017	1.5602	2.35495	2.34963	0.0702733	0.134476	0.199032	0.257488	0.30955	1	1.91361	2.83226	3.6641	4.40495	1441.06	644.367	829.623	884.948	615.608	2.74579	4.01046
b0003	thrb, eck0003, jw0002	homoserine kinase (ec:2,7,1,39)	0.55	1.881	2.194	4.061	6.798	0.766402	2.07358	1.91541	2.87415	3.9919	1	2.7056	2.49922	3.75018	5.20862	111.5	182	293	553.5	658	153.602	200.23	239.368	380.007	389.067	1	1.30356	1.55836	2.47397	2.53295	0.0606329	0.114484	0.166916	0.212688	0.252968	1	1.88814	2.7529	3.5078	4.17212	200.42	96.5626	124.97	132.216	97.4642	19.8028	28.6833
b0004	thrc, eck0004, jw0003	threonine synthase (ec:4,2,3,1)	0.548	1.691	2.267	4.051	6.234	0.762534	1.86482	1.97962	2.86693	3.66034	1	2.44556	2.59611	3.75974	4.80024	2346.5	3681	4746	7187.5	9394	3232.54	4049.7	3877.28	4934.6	5554.55	1	1.25279	1.19945	1.52654	1.71833	0.0606329	0.114484	0.166916	0.212688	0.252968	1	1.88814	2.7529	3.5078	4.17212	4239.21	2171.63	1958.6	1721.21	1517.49	0.940979	1.41819
b0005	yaax, eck0005, jw0004	predicted protein	0.079	0.149	0.242	0.399	0.678	0.110491	0.164603	0.211301	0.282094	0.397938	1	1.48974	1.91238	2.55309	3.60153
b0006	yaaa, eck0006, jw0005	conserved protein	0.088	0.08	0.302	0.413	0.549	0.122485	0.0880674	0.263989	0.292614	0.322585	1	0.719007	2.15528	2.38898	2.63367	42.5	66	103	126	167	58.548	72.6108	84.1466	86.5057	98.745	1	1.24019	1.43722	1.47752	1.68656											478.002	824.492	318.751	295.63	306.105
b0007	yaaj, eck0007, jw0006	predicted transporter	0.457	0.49	0.495	0.799	1.065	0.63672	0.539922	0.43193	0.565389	0.625428	1	0.847974	0.678367	0.887971	0.982265
b0008	talb, eck0008, jw0007, yaak	transaldolase b (ec:2,2,1,2)	0.822	0.976	2.42	3.418	4.27	1.14397	1.07567	2.11271	2.41883	2.50709	1	0.940299	1.84683	2.11442	2.19158	4554.5	6425.5	8761.5	10866.5	12880	6274.28	7069.1	7157.77	7460.43	7615.78	1	1.12668	1.14081	1.18905	1.21381	0.0157098	0.0698739	0.206083	0.386953	0.572084	1	4.4478	13.1181	24.6314	36.4158	5484.67	6571.81	3387.96	3084.31	3037.69	0.125609	0.495868
b0009	mog, bisd, chlg, eck0009, jw0008, moga, yaag	predicted molybdochelatase	0.136	0.186	0.337	0.457	0.539	0.188721	0.205321	0.294169	0.323289	0.316481	1	1.08796	1.55875	1.71305	1.67698	140.5	155	203.5	189	203.5	193.553	170.525	166.251	129.758	120.327	1	0.881028	0.858943	0.670404	0.621675											1025.6	830.53	565.155	401.369	380.202
b0010	yaah, eck0010, jw0009	conserved inner membrane protein associated with acetate transport	0.059	0.074	0.14	0.181	0.189	0.081468	0.0811939	0.122111	0.128114	0.111231	1	0.996636	1.49889	1.57257	1.36534
b0011	yaaw, eck0011, htga, htpy, jw0010	conserved protein	0.064	0.116	0.207	0.293	0.607	0.0885743	0.127557	0.181113	0.207509	0.356666	1	1.44011	2.04476	2.34276	4.02674
b0013	yaai, eck0013, jw0012	predicted protein	0.022	0.038	0.064	0.106	0.111	0.0302846	0.0417045	0.0557087	0.0751813	0.0649433
b0014	dnak, eck0014, gropab, gropc, gropf, grpc, grpf, jw0013, seg	chaperone hsp70, co-chaperone with dnaj	1.2	1.626	2.609	3.75	4.278	1.67133	1.79319	2.27791	2.65401	2.51175	1	1.07291	1.36293	1.58796	1.50285	5868.5	6474	8538.5	9812	11433	8084.44	7122.46	6975.59	6736.46	6760.19	1	0.881008	0.862841	0.833262	0.836197											4837.13	3971.95	3062.28	2538.22	2691.42
b0015	dnaj, eck0015, grop, grpc, jw0014	chaperone hsp40, co-chaperone with dnak	0.752	1.067	1.605	2.264	2.403	1.04775	1.17673	1.40171	1.60233	1.41089	1	1.12311	1.33783	1.52931	1.3466	346	449	597	599	624	476.649	493.974	487.723	411.245	368.963	1	1.03635	1.02323	0.862783	0.774077											454.929	419.784	347.95	256.655	261.51
b0018	mokc, eck4466, gefl	regulatory protein for hokc, overlaps cds of hokc	0.144	0.292	0.305	0.346	0.502	0.200191	0.321964	0.266318	0.24495	0.294952	1	1.60829	1.33032	1.22358	1.47335
b0019	nhaa, ant, anta, eck0020, jw0018	sodium-proton antiporter	0.374	0.378	0.41	0.511	0.752	0.520559	0.417023	0.357838	0.361787	0.441352	1	0.801107	0.687412	0.694997	0.847842
b0020	nhar, anto, eck0021, jw0019, yaab	dna-binding transcriptional activator	0.079	0.157	0.226	0.325	0.491	0.109353	0.172698	0.197026	0.229766	0.288493	1	1.57926	1.80174	2.10113	2.63817
b0023	rpst, eck0024, jw0022, sup	30s ribosomal subunit protein s20	0.466	0.248	2.177	3.155	5.111	0.648593	0.273269	1.90059	2.23268	3.00119	1	0.421326	2.93033	3.44234	4.62724	8014.5	11025	15563.5	22080	28814.5	11040.8	12129.3	12714.7	15159.1	17037.6	1	1.09859	1.15161	1.37301	1.54316	0.556233	1.05669	1.55132	1.99067	2.37954	1	1.89972	2.78898	3.57885	4.27796	17022.7	44386	6689.87	6789.65	5676.96	2.52739	4.37044
b0024	yaay, eck0025, jw5003	predicted protein	0.072	0.176	0.217	0.315	0.398	0.100388	0.193547	0.189345	0.222846	0.233593	1	1.92799	1.88614	2.21985	2.32691
b0025	ribf, eck0026, jw0023, yaac	bifunctional riboflavin kinase/fad synthetase (ec:2,7,1,26 2,7,7,2)	0.414	0.466	1.017	1.33	1.956	0.576361	0.513428	0.887725	0.941304	1.14859	1	0.890811	1.54022	1.63318	1.99283
b0026	iles, eck0027, ilvs, jw0024	isoleucyl-trna synthetase (ec:6,1,1,5)	0.614	1.475	1.494	2.072	2.954	0.854705	1.62662	1.30456	1.4667	1.73454	1	1.90314	1.52633	1.71603	2.02941	1088	1492	1924.5	2135	2261	1498.83	1641.44	1572.23	1465.79	1336.9	1	1.09515	1.04898	0.977957	0.891964	0.0279125	0.052626	0.076601	0.09744	0.115752	1	1.88539	2.74433	3.49091	4.14696	1753.62	1009.11	1205.18	999.381	770.75	0.934248	1.60838
b0027	lspa, eck0028, jw0025	prolipoprotein signal peptidase (signal peptidase ii) (ec:3,4,23,36)	0.359	0.84	0.893	1.59	2.281	0.500289	0.925786	0.779881	1.12536	1.33948	1	1.8505	1.55886	2.24941	2.67741
b0028	fkpb, eck0029, jw0026, slpa, yaad	fkbp-type peptidyl-prolyl cis-trans isomerase (rotamase)	0.475	1.095	1.257	1.746	2.629	0.661246	1.20715	1.09711	1.23542	1.54365	1	1.82557	1.65915	1.86833	2.33446	675	1283	1828	1960	2120.5	929.88	1411.51	1493.4	1345.64	1253.82	1	1.51795	1.60601	1.44712	1.34837											1406.25	1169.29	1361.21	1089.22	812.244
b0029	isph, eck0030, jw0027, lytb, yaae	1-hydroxy-2-methyl-2-(e)-butenyl 4-diphosphate reductase, 4fe-4s	0.253	0.529	0.774	1.019	1.546	0.351598	0.582848	0.676152	0.721471	0.907817	1	1.65771	1.92309	2.05198	2.58198	125.5	175	236	275	314	172.889	192.529	192.802	188.802	185.664	1	1.1136	1.11518	1.09204	1.07389											491.723	330.324	285.146	261.69	204.517
b0030	rihc, eck0031, jw0028, yaaf	ribonucleoside hydrolase 3 (ec:3,2,2,-)	0.163	0.257	0.327	0.336	0.175	0.226892	0.283086	0.285665	0.237886	0.102986	1	1.24767	1.25903	1.04846		181.5	237	229.5	145.5	57	250.034	260.739	187.492	99.8934	33.7034	1	1.04281	0.749864	0.399519	0.134795											1102	921.059	656.335	419.921
b0031	dapb, eck0032, jw0029	dihydrodipicolinate reductase (ec:1,3,1,26)	0.199	0.256	0.689	1.184	2.266	0.276426	0.282593	0.601789	0.837857	1.33051	1	1.02231	2.17703	3.03103	4.81327	430.5	611	807	936.5	1853	593.057	672.2	659.285	642.957	1095.66	1	1.13345	1.11167	1.08414	1.84747	0.0337399	0.0649152	0.0966518	0.125776	0.151825	1	1.92399	2.86462	3.72782	4.49987	2145.44	2378.69	1095.54	767.383	823.483	2.85406	4.84466
b0032	cara, arg, cap, eck0033, jw0030, pyra	carbamoyl phosphate synthetase small subunit, glutamine	0.548	0.574	2.779	4.769	8.627	0.762983	0.632397	2.42664	3.37487	5.0655	1	0.828849	3.18047	4.42327	6.63908	705.5	1012	1824	3784	3821	971.896	1113.37	1490.13	2597.92	2259.31	1	1.14556	1.53322	2.67304	2.32464	0.0682496	0.158997	0.23702	0.302468	0.413894	1	2.32963	3.47284	4.4318	6.06441	1273.81	1760.55	614.071	769.781	446.019	3.52286	7.16416
b0033	carb, cap, eck0034, jw0031, pyra	carbamoyl-phosphate synthase large subunit (ec:6,3,5,5)	0.431	1.937	1.892	3.032	4.968	0.599569	2.13588	1.65197	2.14576	2.91687	1	3.56236	2.75527	3.57883	4.86495	636.5	1086	1788	2766	3505	876.842	1194.78	1460.72	1899.01	2072.46	1	1.36259	1.66589	2.16573	2.36355	0.0682496	0.158997	0.23702	0.302468	0.413894	1	2.32963	3.47284	4.4318	6.06441	1462.45	559.385	884.227	885.005	710.508	3.90476	6.67599
b0034	caif, eck0035, jw0033	dna-binding transcriptional activator	0.045	0.102	0.135	0.233	0.412	0.0630878	0.112353	0.117452	0.165105	0.24185	1	1.78089	1.86172	2.61706	3.83354
b0035	caie, eck0036, jw5004	predicted acyl transferase	0.056	0.09	0.093	0.172	0.183	0.078289	0.099349	0.0809493	0.121799	0.107292	1	1.269		1.55576	1.37045
b0036	caid, eck0037, jw0035, yaal	crotonobetainyl coa hydratase (ec:4,2,1,-)	0.026	0.026	0.041	0.065	0.075	0.0366416	0.0289437	0.0353994	0.0460128	0.0441352
b0037	caic, eck0038, jw0036, yaam	predicted crotonobetaine coa ligase:carnitine coa ligase	0.029	0.053	0.069	0.112	0.18	0.0407785	0.0578947	0.0603682	0.0793946	0.105494
b0038	caib, eck0039, jw0037, yaan	crotonobetainyl coa:carnitine coa transferase (ec:2,8,3,-)	0.036	0.061	0.097	0.143	0.207	0.0504341	0.0677045	0.0847938	0.101345	0.121286
b0039	caia, eck0040, jw0038, yaao	crotonobetaine reductase subunit ii, fad-binding (ec:1,3,99,-)	0.038	0.064	0.121	0.16	0.228	0.0528313	0.0701551	0.105375	0.113074	0.133837
b0040	cait, eck0041, jw0039, yaap	predicted transporter	0.063	0.081	0.097	0.129	0.197	0.0871647	0.0895392	0.0847938	0.0911233	0.115537	1	1.02724	0.9728	1.04542	1.32551
b0041	fixa, eck0042, jw0040, yaaq	predicted electron transfer flavoprotein subunit, etfp adenine	0.051	0.086	0.113	0.18	0.229	0.070374	0.0951764	0.0987889	0.12751	0.134558	1	1.35244	1.40377	1.81188	1.91205
b0042	fixb, eck0043, jw0041, yaar	predicted electron transfer flavoprotein, nad/fad-binding domain and	0.072	0.096	0.081	0.131	0.183	0.0996079	0.105479	0.070527	0.0929278	0.107292	1	1.05894		0.932935	1.07714
b0043	fixc, eck0044, jw0042, yaas	predicted oxidoreductase with fad/nad(p)-binding domain	0.118	0.204	0.187	0.299	0.369	0.163984	0.225191	0.163002	0.211722	0.216725	1	1.37325	0.99401	1.29111	1.32163
b0044	fixx, eck0045, jw0043, yaat	predicted 4fe-4s ferredoxin-type protein	0.032	0.029	0.034	0.045	0.057	0.0442273	0.0318874	0.029365	0.0318751	0.0333705
b0045	yaau, eck0046, jw0044, yabe	predicted transporter	0.091	0.149	0.149	0.216	0.333	0.126834	0.16411	0.1298	0.153078	0.195562	1	1.29389	1.02339	1.20692	1.54187
b0046	keff, eck0047, jw0045, yabf	flavoprotein subunit for the kefc potassium efflux system	0.046	0.044	0.107	0.128	0.181	0.0644956	0.0485706	0.0938495	0.0908256	0.106215	1		1.45513	1.40825
b0047	kefc, eck0048, jw0046, trkc	potassium:proton antiporter	0.107	0.132	0.196	0.263	0.405	0.148514	0.145469	0.170962	0.186153	0.237899	1	0.979499	1.15116	1.25344	1.60187
b0048	fola, eck0049, jw0047, tmra	dihydrofolate reductase (ec:1,5,1,3)	0.197	0.236	0.464	0.596	0.648	0.274688	0.259779	0.405306	0.421937	0.380714	1	0.945727	1.47552	1.53606	1.38599	287.5	386	386	394	407.5	396.06	424.663	315.346	270.502	240.95	1	1.07222	0.796207	0.682982	0.608366											1441.86	1634.71	778.043	641.095	632.888
b0049	apah, cfcb, eck0050, jw0048	diadenosine tetraphosphatase (ec:3,6,1,41)	0.256	0.295	0.45	0.593	0.829	0.356934	0.325276	0.392958	0.419826	0.486918	1	0.911305	1.10092	1.1762	1.36417	69	83	99	103	118.5	95.0544	91.3136	80.8788	70.7149	70.0675	1	0.960646	0.850869	0.743942	0.737131											266.308	280.726	205.821	168.439	143.9
b0050	apag, cord, eck0051, jw0049, temp	protein associated with co2+ and mg2+ efflux	0.374	0.48	0.678	0.92	1.337	0.52128	0.529126	0.59191	0.650792	0.7851	1	1.01505	1.13549	1.24845	1.5061
b0051	rsma, eck0052, jw0050, ksga	s-adenosylmethionine-6-n',n'-adenosyl (rrna) dimethyltransferase	0.322	0.426	0.69	0.949	1.61	0.448147	0.469273	0.602884	0.67185	0.945138	1	1.04714	1.34528	1.49917	2.10899	174	211.5	288	318	547.5	239.702	232.685	235.284	218.324	323.73	1	0.970724	0.981566	0.910812	1.35055											534.874	495.84	390.264	324.959	342.521
b0052	pdxa, eck0053, jw0051	4-hydroxy-l-threonine phosphate dehydrogenase, nad-dependent	0.312	0.5	0.756	1.086	1.844	0.434834	0.551203	0.660239	0.768684	1.08293	1	1.26762	1.51837	1.76776	2.49044
b0053	sura, eck0054, jw0052	peptidyl-prolyl cis-trans isomerase (ppiase) (ec:5,2,1,8)	0.59	1.025	1.186	1.62	2.656	0.820883	1.13037	1.03591	1.14671	1.5598	1	1.37702	1.26194	1.39692	1.90015	1462	1628.5	1866	1980	2430.5	2014.05	1791.62	1524.44	1359.37	1437.12	1	0.889559	0.756904	0.674946	0.713549											2453.52	1584.98	1471.6	1185.46	921.35
b0054	lptd, eck0055, imp, jw0053, osta, yabg	exported protein required for envelope biosynthesis and integrity	0.798	1.008	1.373	1.98	2.771	1.11077	1.11197	1.19891	1.40113	1.6269	1	1.00108	1.07935	1.26141	1.46465	57	60	76	79	54	78.5232	66.0098	62.0888	54.2377	31.9295	1	0.840642	0.790706	0.690722	0.406625											70.6924	59.3628	51.7877	38.7098	19.626
b0055	djla, eck0056, jw0054, yabh	dnaj-like protein, membrane anchored	0.091	0.13	0.243	0.367	0.577	0.126265	0.143747	0.211845	0.259539	0.339087	1	1.13846	1.67778	2.05552	2.68553
b0058	rlua, eck0059, jw0057, yabo	pseudouridine synthase for 23s rrna (position 746) and	0.149	0.288	0.299	0.467	0.691	0.207433	0.317424	0.260696	0.330507	0.405473	1	1.53025	1.25677	1.59332	1.95472
b0059	hepa, eck0060, jw0058, rapa, yaba	rna polymerase-associated helicase protein (atpase and rna	0.104	0.204	0.328	0.466	0.864	0.145094	0.225434	0.286216	0.329912	0.507371	1	1.55371	1.97263	2.27378	3.49685	68	74.5	120	142.5	187	93.6768	81.9622	98.0349	97.8338	110.571	1	0.874947	1.04652	1.04438	1.18034											645.63	363.575	342.52	296.545	217.929
b0060	polb, dina, eck0061, jw0059	dna polymerase ii (ec:2,7,7,7)	0.079	0.125	0.131	0.184	0.238	0.109683	0.13786	0.114159	0.130216	0.139586	1	1.2569	1.04081	1.18721	1.27263
b0061	arad, eck0062, jw0060	l-ribulose-5-phosphate 4-epimerase (ec:5,1,3,4)	0.318	0.644	1.023	1.501	0.824	0.44215	0.709669	0.892945	1.06251	0.484055	1	1.60504	2.01955	2.40305	1.09478
b0062	araa, eck0063, jw0061	l-arabinose isomerase (ec:5,3,1,4)	0.054	0.088	0.075	0.074	0.064	0.0755301	0.0973841	0.0655876	0.0520305	0.0376764	1	1.28934				64					88.1664																				1167.3
b0063	arab, eck0064, jw0062	l-ribulokinase (ec:2,7,1,16)	0.054	0.081	0.074	0.071	0.081	0.0755014	0.0888033	0.0644845	0.0505238	0.0473646	1	1.17618
b0065	yabi, eck0066, jw5005	conserved inner membrane protein	0.117	0.198	0.172	0.23	0.283	0.162516	0.218811	0.14983	0.162696	0.166131	1	1.3464	0.92194	1.00111	1.02225
b0066	thiq, eck0067, jw0065, sfuc, yabj	thiamin transporter subunit	0.055	0.095	0.133	0.204	0.306	0.0770602	0.1045	0.115805	0.144652	0.17977	1	1.35609	1.50279	1.87712	2.33285
b0067	thip, eck0068, jw0066, sfub, yabk	fused thiamin transporter subunits of abc superfamily: membrane	0.143	0.275	0.348	0.52	0.78	0.199007	0.303692	0.303776	0.368102	0.457854	1	1.52603	1.52646	1.84969	2.30069
b0068	thib, eck0069, jw0067, sfua, tbpa, yabl	thiamin transporter subunit	0.255	0.264	0.727	1.104	1.524	0.354566	0.290688	0.634719	0.781017	0.8949	1	0.819842	1.79013	2.20274	2.52393	461.5	637.5	999.5	1283.5	1720.5	635.762	701.355	816.549	881.191	1017.31	1	1.10317	1.28436	1.38604	1.60014											1793.07	2412.74	1286.47	1128.26	1136.79
b0069	sgrr, eck0070, jw0068, yabn	dna-binding transcriptional regulator	0.073	0.1	0.16	0.234	0.314	0.101617	0.109895	0.139951	0.165402	0.184431	1	1.08146	1.37723	1.6277	1.81495
b0070	seta, eck0072, jw0069, yabm	broad specificity sugar efflux system	0.1	0.167	0.215	0.321	0.371	0.139428	0.18398	0.187971	0.22706	0.217802	1	1.31954	1.34816	1.62851	1.56211
b0071	leud, eck0073, jw0070	3-isopropylmalate isomerase subunit (ec:4,2,1,33)	1.188	2.85	2.446	2.545	3.449	1.65415	3.14262	2.13576	1.80081	2.02519	1	1.89984	1.29115	1.08866	1.22431	5439	9337	9935.5	10146	11315.5	7492.76	10272.2	8116.88	6965.76	6690.71	1	1.37095	1.0833	0.929666	0.892956	0.0503626	0.0954324	0.139705	0.178752	0.213232	1	1.89491	2.77397	3.5493	4.23394	4529.68	3268.69	3800.47	3868.12	3303.74	0.337195	0.466065
b0072	leuc, eck0074, jw0071	3-isopropylmalate isomerase subunit, dehydratase component	2.151	4.288	3.735	4.597	6.792	2.99556	4.72852	3.26086	3.25337	3.98831	1	1.57851	1.08856	1.08606	1.33141	3271.5	4989	5898	5551.5	5772	4506.82	5488.72	4818.41	3811.4	3412.91	1	1.21787	1.06914	0.845696	0.757277	0.0503626	0.0954324	0.139705	0.178752	0.213232	1	1.89491	2.77397	3.5493	4.23394	1504.5	1160.77	1477.65	1171.52	855.728	0.560601	0.872248
b0073	leub, eck0075, jw5807	3-isopropylmalate dehydrogenase (ec:1,1,1,85)	2.251	3.699	3.858	5.279	6.914	3.13511	4.0787	3.3687	3.73635	4.05971	1	1.30098	1.07451	1.19178	1.29492	2886	5064.5	5898.5	5095.5	5490.5	3975.75	5571.78	4818.82	3498.33	3246.46	1	1.40144	1.21205	0.879916	0.816566	0.0503626	0.0954324	0.139705	0.178752	0.213232	1	1.89491	2.77397	3.5493	4.23394	1268.14	1366.07	1430.47	936.295	799.678	0.635483	0.859245
b0074	leua, eck0076, jw0073	2-isopropylmalate synthase (ec:2,3,3,13)	2.514	1.943	3.209	4.119	4.672	3.50032	2.1425	2.80176	2.91504	2.74356	1	0.612087	0.800429	0.832794	0.783802	3656	5494	5505	4802	4351.5	5036.5	6044.3	4497.35	3296.83	2572.99	1	1.2001	0.892951	0.654586	0.510868	0.0503626	0.0954324	0.139705	0.178752	0.213232	1	1.89491	2.77397	3.5493	4.23394	1438.87	2821.14	1605.19	1130.97	937.828	0.501643	0.792073
b0075	leul, eck0077, jw0074, leulp	leu operon leader peptide	0.714	0.774	1.579	1.911	1.457	0.993534	0.853666	1.37893	1.35241	0.855792	1	0.859222	1.3879	1.36122	0.861361
b0076	leuo, eck0078, jw0075	dna-binding transcriptional activator	0.021	0.06	0.078	0.138	0.264	0.028875	0.0664755	0.0677774	0.0977365	0.155011
b0077	ilvi, eck0079, jw0076	acetolactate synthase iii, large subunit (ec:2,2,1,6)	0.377	0.693	1.104	1.523	2.567	0.525177	0.764127	0.963743	1.07754	1.50741	1	1.45499	1.83508	2.05176	2.87029	575.5	856	957	1032.5	1253.5	792.809	941.741	781.828	708.866	741.178	1	1.18785	0.98615	0.89412	0.934877	0.117992	0.223616	0.32741	0.418992	0.499874	1	1.89519	2.77485	3.55103	4.23652	1509.6	1232.44	811.241	657.857	491.69	7.46618	11.9121
b0078	ilvh, brnp, eck0080, jw0077	acetolactate synthase iii, thiamin-dependent, small subunit	0.427	0.865	1.148	1.657	2.111	0.59489	0.953258	1.00216	1.17258	1.23974	1	1.60241	1.68461	1.97108	2.08397	749	864.5	1160.5	1239	1685.5	1031.82	951.092	948.079	850.639	996.615	1	0.92176	0.91884	0.824405	0.965878	0.117992	0.223616	0.32741	0.418992	0.499874	1	1.89519	2.77485	3.55103	4.23652	1734.47	997.728	946.04	725.444	803.893	5.7367	11.795
b0080	frur, cra, eck0081, fruc, jw0078, shl	dna-binding transcriptional dual regulator	0.28	0.316	0.561	0.641	0.662	0.389708	0.34809	0.489828	0.453812	0.388605	1	0.893206	1.25691	1.16449	0.997169	300	389.5	403.5	339	298.5	413.28	428.514	329.642	232.741	176.499	1	1.03686	0.797625	0.563157	0.42707											1060.49	1231.04	672.975	512.858	454.187
b0081	mraz, eck0082, jw0079, yabb	conserved protein	0.333	0.399	0.829	1.181	1.454	0.464039	0.439586	0.72418	0.835745	0.853639	1	0.947305	1.5606	1.80102	1.83958
b0082	mraw, eck0083, jw0080, yabc	s-adenosyl-dependent methyltransferase activity on membrane-located	0.209	0.324	0.523	0.761	1.009	0.290728	0.357657	0.456627	0.538918	0.592412	1	1.23021	1.57063	1.85368	2.03769	147	219	198	228	291	202.507	240.936	161.758	156.534	172.065	1	1.18977	0.798775	0.77298	0.849672											696.552	673.652	354.244	290.46	290.447
b0083	ftsl, eck0084, jw0081, mrar, yabd	membrane bound cell division protein at septum containing leucine	0.309	0.503	0.662	0.962	1.425	0.430397	0.554883	0.578187	0.680872	0.83677	1	1.28924	1.34338	1.58196	1.94418
b0084	ftsi, eck0085, jw0082, pbpb, sep	transpeptidase involved in septal peptidoglycan synthesis	0.332	0.661	0.722	1.059	1.439	0.46257	0.72856	0.630051	0.749133	0.844672	1	1.57503	1.36207	1.6195	1.82604
b0085	mure, eck0086, jw0083	udp-n-acetylmuramoyl-l-alanyl-d-glutamate:meso-diaminopimelate	0.193	0.441	0.579	0.909	1.488	0.26854	0.486442	0.505742	0.642979	0.873736	1	1.81143	1.8833	2.39435	3.25365	66	137	134	172	243	90.9216	150.722	109.472	118.087	143.683	1	1.65772	1.20403	1.29878	1.58029											338.577	309.847	216.459	183.656	164.446
b0086	murf, eck0087, jw0084, mra	udp-n-acetylmuramoyl-tripeptide:d-alanyl-d-alanine ligase	0.151	0.362	0.459	0.709	1.143	0.209802	0.399111	0.400647	0.501629	0.67136	1	1.90233	1.90965	2.39097	3.19998	94	111	151	211	262	129.494	122.118	123.361	144.863	154.917	1	0.943039	0.952633	1.11868	1.19632											617.223	305.976	307.904	288.784	230.751
b0087	mray, eck0088, jw0085, murx	phospho-n-acetylmuramoyl-pentapeptide transferase (ec:2,7,8,13)	0.167	0.489	0.442	0.655	1.091	0.231928	0.538693	0.385828	0.463439	0.640853	1	2.32267	1.66357	1.9982	2.76315
b0088	murd, eck0089, jw0086	udp-n-acetylmuramoyl-l-alanine:d-glutamate ligase (ec:6,3,2,9)	0.231	0.503	0.516	0.75	1.054	0.321644	0.555126	0.450584	0.530798	0.618614	1	1.7259	1.40088	1.65027	1.92329	70	79	90	144	132	96.432	86.913	73.5262	98.8636	78.0499	1	0.901288	0.762467	1.02522	0.809378											299.81	156.564	163.18	186.255	126.169
b0089	ftsw, eck0090, jw0087	integral membrane protein involved in stabilizing fstz ring during	0.251	0.526	0.489	0.764	1.138	0.349798	0.580147	0.42699	0.541029	0.668131	1	1.65852	1.22068	1.54669	1.91005
b0090	murg, eck0091, jw0088	n-acetylglucosaminyl transferase (ec:2,4,1,227)	0.31	0.6	0.617	0.888	1.493	0.431475	0.661348	0.538671	0.628237	0.8766	1	1.53276	1.24844	1.45602	2.03163
b0091	murc, eck0092, jw0089	udp-n-acetylmuramate:l-alanine ligase (ec:6,3,2,8)	0.233	0.582	0.561	0.8	1.245	0.325061	0.641721	0.489828	0.565984	0.731277	1	1.97415	1.50688	1.74116	2.24966	74.5	99.5	149.5	186	243	102.631	109.466	122.135	127.699	143.683	1	1.0666	1.19004	1.24425	1.39999											315.729	170.582	249.343	225.623	196.482
b0092	ddlb, ddl, eck0093, jw0090	d-alanine:d-alanine ligase (ec:6,3,2,4)	0.44	0.976	0.832	1.144	1.677	0.612222	1.07616	0.726098	0.809581	0.984968	1	1.75779	1.18601	1.32237	1.60884	74	97	126	154	209.5	101.942	106.716	102.937	105.729	123.875	1	1.04683	1.00975	1.03715	1.21514											166.512	99.164	141.767	130.597	125.765
b0093	ftsq, eck0094, jw0091	membrane anchored protein involved in growth of wall at septum	0.486	0.935	0.942	1.367	1.912	0.676809	1.03078	0.822146	0.967468	1.12276	1	1.523	1.21474	1.42946	1.6589
b0094	ftsa, diva, eck0095, jw0092	atp-binding cell division protein involved in recruitment of ftsk to	0.379	0.746	0.852	1.146	1.592	0.527785	0.822264	0.743938	0.81079	0.934729	1	1.55795	1.40955	1.53621	1.77104	269	351.5	500	447.5	571	370.574	386.708	408.479	307.232	337.625	1	1.04354	1.10229	0.829071	0.911086											702.131	470.296	549.076	378.93	361.201
b0095	ftsz, eck0096, jw0093, sfib, sulb	gtp-binding tubulin-like cell division protein	1.335	1.88	2.469	3.187	4.177	1.8593	2.07259	2.1558	2.25523	2.45255	1	1.11471	1.15946	1.21294	1.31907	1777.5	2151.5	2714	3049.5	3599	2448.68	2367	2217.22	2093.64	2128.04	1	0.966643	0.905475	0.855008	0.869056											1316.99	1142.05	1028.49	928.35	867.686
b0096	lpxc, asmb, eck0097, enva, jw0094	udp-3-o-acyl n-acetylglucosamine deacetylase (ec:3,5,1,-)	1.419	1.466	2.071	2.693	3.396	1.97618	1.61632	1.80811	1.90607	1.99397	1	0.8179	0.91495	0.964523	1.009
b0097	secm, eck0098, jw5007, srra, yaca	regulator of seca translation	0.422	0.56	0.967	1.332	1.908	0.587335	0.617193	0.844373	0.942811	1.1206	1	1.05084	1.43763	1.60523	1.90794
b0098	seca, azi, eck0099, jw0096, pea, prld	preprotein translocase subunit, atpase	0.346	0.862	0.883	1.201	1.981	0.48149	0.950314	0.770553	0.849883	1.16294	1	1.97369	1.60035	1.76511	2.41529	537.5	676.5	839	902	1082.5	740.46	744.261	685.427	619.271	640.068	1	1.00513	0.925678	0.836333	0.86442											1537.85	783.174	889.526	728.654	550.388
b0099	mutt, eck0100, jw0097, nuda	nucleoside triphosphate pyrophosphohydrolase, marked preference for	0.101	0.177	0.196	0.314	0.499	0.141076	0.195018	0.171506	0.222548	0.292799	1	1.38236	1.21569	1.5775	2.07547
b0101	yacg, eck0101, jw5008	dna gyrase inhibitor	0.11	0.146	0.275	0.383	0.525	0.153775	0.160798	0.239975	0.271114	0.308408	1	1.04567	1.56056	1.76306	2.00558
b0102	yacf, eck0102, jw0099	conserved protein	0.166	0.181	0.43	0.569	0.852	0.23088	0.199927	0.375398	0.402386	0.500202	1	0.865934	1.62594	1.74283	2.1665	129.5	161.5	178	208	262.5	178.399	177.677	145.418	142.803	155.213	1	0.995949	0.815129	0.800469	0.870032											772.691	888.707	387.371	354.89	310.3
b0103	coae, eck0103, jw0100, yace	dephospho-coa kinase (ec:2,7,1,24)	0.233	0.214	0.478	0.662	0.782	0.324912	0.235494	0.417655	0.468545	0.459296	1	0.724793	1.28544	1.44207	1.4136
b0104	guac, eck0104, jw0101	gmp reductase (ec:1,7,1,7)	0.153	0.154	0.857	1.328	1.558	0.213099	0.169261	0.748326	0.9395	0.914997	1	0.794284	3.51163	4.40874	4.29376	204	269	526	988.5	927	281.03	295.944	429.72	678.657	548.123	1	1.05307	1.52909	2.41489	1.95041											1318.78	1748.45	574.241	722.361	599.044
b0106	hofc, eck0105, hopc, jw0102, yacd	assembly protein in type iv pilin biogenesis, transmembrane protein	0.03	0.04	0.075	0.096	0.12	0.041589	0.0436621	0.0655876	0.0682703	0.0703256
b0107	hofb, eck0106, hopb, jw0103	conserved protein with nucleoside triphosphate hydrolase domain	0.021	0.029	0.041	0.056	0.077	0.0294453	0.0316445	0.0353994	0.0396973	0.0452116
b0108	ppdd, eck0107, jw0104	predicted major pilin subunit	0.034	0.025	0.036	0.05	0.079	0.0477652	0.0274718	0.0312832	0.0351862	0.0466433
b0109	nadc, eck0108, jw0105	quinolinate phosphoribosyltransferase (ec:2,4,2,19)	0.128	0.11	0.34	0.456	0.643	0.178438	0.121184	0.296918	0.322387	0.37784	1	0.679138	1.66399	1.80672	2.11749	288	364	436	443	537	396.749	400.46	356.193	304.143	317.521	1	1.00935	0.897781	0.766588	0.800308											2223.46	3304.57	1199.63	943.409	840.359
b0110	ampd, eck0109, jw0106	n-acetyl-anhydromuranmyl-l-alanine amidase (ec:3,5,1,28)	0.2	0.334	0.427	0.587	0.782	0.278705	0.368202	0.372928	0.415315	0.459296	1	1.32112	1.33808	1.49016	1.64797
b0111	ampe, eck0110, jw0107	predicted inner membrane protein	0.114	0.202	0.255	0.339	0.419	0.158587	0.22249	0.222547	0.23969	0.24579	1	1.40296	1.40331	1.51142	1.54988
b0112	arop, eck0111, jw0108	aromatic amino acid transporter	0.509	1.088	1.616	2.211	2.884	0.708771	1.19979	1.41131	1.56443	1.69328	1	1.69278	1.9912	2.20725	2.38904	280.5	428	650	660	687	386.417	470.87	531.022	453.125	406.214	1	1.21856	1.37422	1.17263	1.05123											545.192	392.46	376.263	289.641	239.897
b0113	pdhr, acec, eck0112, gena, jw0109, yacb	dna-binding transcriptional dual regulator	0.142	0.103	0.428	0.568	0.834	0.197417	0.113089	0.374023	0.402088	0.489437	1	0.572842	1.89459	2.03675	2.47921	83	100	173	213	307	114.341	110.016	141.334	146.236	181.525	1	0.96218	1.23607	1.27895	1.58758											579.185	972.833	377.874	363.69	370.885
b0114	acee, eck0113, jw0110	pyruvate dehydrogenase, decarboxylase component e1, thiamin-binding	1.641	2.942	3.376	5.588	7.925	2.28484	3.24442	2.94803	3.955	4.65321	1	1.41998	1.29025	1.73097	2.03656	4253.5	6049.5	7359	8538.5	10114	5859.62	6655.44	6011.99	5862.13	5980.28	1	1.13581	1.026	1.00043	1.02059	1.70426	3.03747	4.04818	4.72574	5.71586	1	1.78228	2.37533	2.7729	3.35387	2564.56	2051.35	2039.33	1482.21	1285.19	14.5909	22.8955
b0115	acef, eck0114, jw0111	pyruvate dehydrogenase, dihydrolipoyltransacetylase component e2	1.081	2.319	2.494	3.763	5.434	1.50594	2.55682	2.17747	2.66303	3.191	1	1.69783	1.44592	1.76835	2.11895	2556	3147.5	4134.5	4573.5	6478	3521.14	3462.77	3377.71	3139.95	3830.36	1	0.983421	0.959265	0.891741	1.08782	1.70426	3.03747	4.04818	4.72574	5.71586	1	1.78228	2.37533	2.7729	3.35387	2338.17	1354.32	1551.21	1179.09	1200.36	24.2811	44.0052
b0116	lpd, dhl, eck0115, jw0112, lpda	lipoamide dehydrogenase, e3 component is part of three enzyme	1.3	2.887	4.513	6.377	7.453	1.80965	3.18358	3.9403	4.51286	4.37656	1	1.75923	2.17738	2.49378	2.41846	5475	10116	14720	15611.5	16157	7542.36	11129.3	12025.6	10718.1	9553.43	1	1.47557	1.59441	1.42106	1.26664	1.70426	3.03747	4.04818	4.72574	5.71586	1	1.78228	2.37533	2.7729	3.35387	4167.85	3495.83	3051.95	2375.02	2182.86	11.3356	13.6918
b0117	yach, eck0116, jw0113	predicted protein	0.034	0.053	0.085	0.119	0.129	0.0476761	0.0581376	0.07382	0.0842034	0.075708
b0118	acnb, eck0117, jw0114, yaci, yacj	bifunctional aconitate hydratase 2/2-methylisocitrate dehydratase	2.766	4.948	5.138	5.831	5.151	3.85102	5.45586	4.48584	4.12642	3.02487	1	1.41673	1.16484	1.07151	0.785473	6571.5	10769	11400.5	9092.5	7847	9052.9	11847.7	9313.72	6242.48	4639.83	1	1.30872	1.02881	0.689556	0.512525	1.39943	2.45686	3.02046	3.16887	3.21147	1	1.75562	2.15835	2.26441	2.29485	2350.78	2171.55	2076.25	1512.81	1533.89	7.75493	10.4031
b0119	yacl, eck0118, jw0115	conserved protein	0.285	0.651	0.539	0.729	1.281	0.396634	0.718257	0.470622	0.516065	0.752095	1	1.81088	1.18654	1.30111	1.89619
b0120	sped, eck0119, jw0116	s-adenosylmethionine decarboxylase (ec:4,1,1,50)	0.312	0.875	1.635	2.686	3.842	0.434803	0.96479	1.42723	1.90096	2.25592	1	2.21891	3.28247	4.372	5.18837
b0121	spee, eck0120, jw0117	spermidine synthase (putrescine aminopropyltransferase)	0.353	0.782	1.56	2.289	3.649	0.491115	0.86274	1.36219	1.62007	2.14289	1	1.7567	2.77367	3.29877	4.36332	231	366	502	891	721	318.225	402.66	410.113	611.719	426.318	1	1.26533	1.28875	1.92228	1.33967											647.965	466.723	301.068	377.587	198.945
b0122	yacc, eck0121, gsps, jw0118	predicted protein	0.092	0.137	0.273	0.393	0.585	0.128453	0.151356	0.238188	0.278179	0.343748	1	1.1783	1.85428	2.1656	2.67606
b0123	cueo, cuid, eck0122, jw0119, yack	multicopper oxidase (laccase)	0.144	0.245	0.469	0.724	1.193	0.201045	0.270325	0.409422	0.512456	0.700425	1	1.3446	2.03648	2.54897	3.48393	371.5	410	693	848	925	511.778	451.067	566.151	582.197	546.941	1	0.881373	1.10624	1.1376	1.06871											2545.6	1668.61	1382.81	1136.09	780.87
b0124	gcd, eck0123, jw0120	glucose dehydrogenase (ec:1,1,5,2)	0.274	0.4	0.612	0.849	2.212	0.381132	0.441308	0.534283	0.600575	1.29894	1	1.15789	1.40183	1.57577	3.40811	143	128	186.5	248	433	196.997	140.821	152.363	170.265	256.027	1	0.714839	0.773427	0.864304	1.29965											516.873	319.099	285.172	283.503	197.105
b0125	hpt, eck0124, jw5009	hypoxanthine phosphoribosyltransferase (ec:2,4,2,8)	0.329	0.435	0.919	1.339	2.359	0.458013	0.480062	0.802108	0.947926	1.38506	1	1.04814	1.75128	2.06965	3.02406	506.5	757	941.5	1239	1784.5	697.754	832.824	769.165	850.639	1055.15	1	1.19358	1.10234	1.21911	1.51221											1523.44	1734.83	958.93	897.368	761.811
b0126	can, eck0125, jw0122, yadf	carbonic anhydrase (ec:4,2,1,1)	0.909	0.554	2.085	3.287	4.451	1.26546	0.611055	1.82074	2.3262	2.61366	1	0.482871	1.43879	1.83822	2.06538	2003.5	2677	3151	4097	4558	2760.02	2945.14	2574.23	2812.81	2695.09	1	1.06707	0.932686	1.01913	0.976474											2181.04	4819.76	1413.84	1209.19	1031.15
b0127	yadg, eck0126, jw0123	predicted transporter subunit: atp-binding component of abc	0.226	0.394	0.669	0.922	1.328	0.314177	0.434685	0.584229	0.652299	0.779718	1	1.38357	1.85955	2.07621	2.48178	198	243	301	293.5	351	272.765	267.34	245.904	201.503	207.542	1	0.980112	0.901525	0.738744	0.760882											868.188	615.02	420.903	308.913	266.176
b0128	yadh, eck0127, jw0124	predicted transporter subunit: membrane component of abc superfamily	0.128	0.22	0.367	0.47	0.692	0.177748	0.24261	0.320792	0.332916	0.406549	1	1.36491	1.80476	1.87297	2.28723
b0129	yadi, agax, eck0128, jw0125	predicted pts enzyme iia	0.092	0.311	0.148	0.143	0.416	0.128273	0.343181	0.12952	0.101048	0.244003	1	2.67539	1.00972	0.787753	1.90221
b0130	yade, eck0129, jw0126	predicted polysaccharide deacetylase lipoprotein	0.041	0.076	0.111	0.146	0.197	0.0567902	0.0836519	0.0965908	0.103457	0.115903	1	1.473	1.70084	1.82173	2.0409
b0131	pand, eck0130, jw0127	aspartate 1-decarboxylase (ec:4,1,1,11)	0.372	0.184	0.843	1.28	1.973	0.517741	0.202871	0.735706	0.906118	1.15863	1	0.391838	1.42099	1.75014	2.23786
b0132	yadd, eck0131, jw5010	predicted transposase	0.123	0.183	0.22	0.311	0.436	0.170881	0.201642	0.191815	0.219842	0.255844	1	1.18001	1.1225	1.28652	1.4972
b0133	panc, eck0132, jw0129	pantothenate synthetase (ec:6,3,2,1)	0.271	0.234	0.839	1.121	1.624	0.377534	0.257572	0.732413	0.793648	0.953395	1	0.682248	1.93999	2.10219	2.52532	827	951	1121.5	1184.5	1441.5	1139.27	1046.26	916.218	813.222	852.34	1	0.918353	0.804211	0.713807	0.748143											3017.68	4062	1250.96	1024.66	894.006
b0134	panb, eck0133, jw0130	3-methyl-2-oxobutanoate hydroxymethyltransferase (ec:2,1,2,11)	0.646	0.5	1.592	2.425	3.206	0.900102	0.551696	1.38963	1.71601	1.88274	1	0.612926	1.54386	1.90646	2.0917	2143.5	2492	2666.5	3152	3411	2952.88	2741.61	2178.42	2164.01	2016.88	1	0.928451	0.737725	0.732848	0.68302											3280.61	4969.42	1567.62	1261.08	1071.25
b0135	yadc, eck0134, fmab, jw0131	predicted fimbrial-like adhesin protein	0.016	0.024	0.049	0.071	0.104	0.0225792	0.0262502	0.0430802	0.0499193	0.0610034
b0136	yadk, eck0135, jw0132	predicted fimbrial-like adhesin protein	0.014	0.043	0.063	0.093	0.124	0.0201486	0.0475919	0.0546056	0.0658614	0.0728445
b0137	yadl, eck0136, jw0133	predicted fimbrial-like adhesin protein	0.034	0.073	0.096	0.149	0.151	0.0468953	0.080458	0.0836989	0.105261	0.0886256
b0138	yadm, eck0137, fmac, jw0134	predicted fimbrial-like adhesin protein	0.097	0.178	0.164	0.294	0.392	0.135678	0.195997	0.143244	0.207806	0.230009	1	1.44457	1.05576	1.53161	1.69525
b0139	htre, eck0138, jw0135	predicted outer membrane usher protein	0.013	0.022	0.028	0.045	0.064	0.0187094	0.0240425	0.0241457	0.0321819	0.0376764
b0140	ecpd, eck0139, jw0136	predicted periplasmic pilin chaperone	0.009	0.009	0.011	0.019	0.049	0.0130135	0.00956694	0.00960722	0.0132354	0.0290646
b0141	yadn, eck0140, fmad, jw0137	predicted fimbrial-like adhesin protein	0.018	0.056	0.062	0.105	0.163	0.0256969	0.06206	0.0543339	0.0742791	0.0958056
b0142	folk, eck0141, jw0138	2-amino-4-hydroxy-6-hydroxymethyldihyropteridine pyrophosphokinase	0.143	0.226	0.374	0.581	0.579	0.198586	0.249719	0.326275	0.411111	0.339808	1	1.25749	1.64299	2.07019	1.71114
b0143	pcnb, eck0142, jw5808	poly(a) polymerase i (ec:2,7,7,19)	0.296	0.232	0.906	1.269	1.787	0.412586	0.255364	0.790863	0.897998	1.04956	1	0.618935	1.91684	2.17651	2.54385
b0144	yadb, eck0143, jw5892	glutamyl-q trna(asp) synthetase (ec:6,1,1,-)	0.054	0.065	0.201	0.263	0.334	0.0750507	0.0711413	0.175902	0.185856	0.195917	1		2.34377	2.4764	2.61046
b0145	dksa, eck0144, jw0141, msma	dna-binding transcriptional regulator of rrna transcription, dnak	1.246	1.351	2.199	2.835	2.926	1.73553	1.4895	1.9198	2.00652	1.71804	1	0.858241	1.10618	1.15614	0.989926	2670.5	3769.5	5489	6276.5	6278	3678.88	4147.07	4484.28	4309.15	3712.1	1	1.12726	1.21893	1.17132	1.00903											2119.75	2784.2	2335.81	2147.58	2160.66
b0146	sfsa, eck0145, jw0142, sfs, sfs1	predicted dna-binding transcriptional regulator	0.606	0.741	0.644	0.866	1.167	0.844301	0.817363	0.562545	0.613206	0.684988	1	0.968094	0.666285	0.726288	0.811308
b0147	ligt, eck0146, jw5011, yadp	2'-5' rna ligase (ec:6,5,1,-)	0.057	0.041	0.165	0.242	0.265	0.0793388	0.044891	0.143795	0.171122	0.155367	1		1.81242	2.15686	1.95827
b0148	hrpb, eck0147, jw0144, yado	predicted atp-dependent helicase	0.07	0.131	0.168	0.247	0.37	0.0974194	0.144733	0.146809	0.175029	0.217091	1	1.48567	1.50697	1.79665	2.22842
b0149	mrcb, eck0148, jw0145, pbpf, ponb	fused glycosyl transferase and transpeptidase (ec:2,4,1,129 3,4,-,-)	0.112	0.222	0.273	0.354	0.54	0.15586	0.244818	0.238468	0.25021	0.316837	1	1.57075	1.53001	1.60535	2.03283	208.5	259	285.5	298	304	287.229	284.943	233.241	204.593	179.751	1	0.992038	0.812038	0.712297	0.625811											1842.87	1163.89	978.082	817.683	567.331
b0150	fhua, eck0149, jw0146, t1, tona	ferrichrome outer membrane transporter	0.177	0.356	0.611	0.803	1.091	0.246112	0.392981	0.533188	0.568393	0.640498	1	1.59675	2.16645	2.30949	2.60247
b0151	fhuc, eck0150, jw0147	iron-hydroxamate transporter subunit	0.067	0.131	0.201	0.293	0.43	0.092982	0.144976	0.175902	0.207509	0.252615	1	1.55918	1.89178	2.23171	2.71681
b0152	fhud, eck0151, jw0148	iron-hydroxamate transporter subunit	0.042	0.086	0.119	0.173	0.258	0.0580198	0.0951764	0.10428	0.122096	0.151782	1	1.64041	1.79731	2.10439	2.61603
b0153	fhub, eck0152, jw0149	fused iron-hydroxamate transporter subunits of abc superfamily:	0.066	0.135	0.146	0.196	0.277	0.0919628	0.149149	0.127874	0.138643	0.162547	1	1.62184	1.3905	1.5076	1.76753
b0154	heml, eck0153, jw0150, popc	glutamate-1-semialdehyde aminotransferase (aminomutase) (ec:5,4,3,8)	0.169	0.243	0.563	0.765	1.042	0.235588	0.267874	0.491203	0.541624	0.611789	1	1.13705	2.08501	2.29904	2.59686	857.5	1147	1680	2036.5	2595.5	1181.29	1261.89	1372.49	1398.16	1534.69	1	1.06823	1.16185	1.18359	1.29916											5014.24	4710.75	2794.14	2581.43	2508.52
b0155	clca, eck0154, eric, jw5012, yadq	chloride channel, voltage-gated	0.141	0.219	0.29	0.38	0.516	0.196278	0.241624	0.253286	0.268859	0.302843	1	1.23103	1.29045	1.36979	1.54293
b0156	erpa, eck0155, jw0152, yadr	conserved protein	0.447	0.424	1.118	1.423	1.732	0.622206	0.467066	0.976092	1.00717	1.01726	1	0.750661	1.56876	1.6187	1.63493	644.5	959.5	1350.5	1736.5	2357.5	887.863	1055.61	1103.3	1192.2	1393.96	1	1.18893	1.24265	1.34277	1.57002											1426.96	2260.08	1130.32	1183.72	1370.31
b0157	yads, eck0156, jw0153	conserved inner membrane protein	0.061	0.065	0.149	0.184	0.224	0.0842556	0.0713841	0.130072	0.130523	0.131329	1		1.54378	1.54913	1.5587
b0158	btuf, eck0157, jw0154, yadt	vitamin b12 transporter subunit: periplasmic-binding component of	0.07	0.097	0.197	0.276	0.48	0.0969984	0.107444	0.172329	0.195482	0.282034	1	1.10769	1.77662	2.01531	2.90762
b0159	mtn, eck0158, jw0155, mtnn, pfs, yada	5'-methylthioadenosine/s-adenosylhomocysteine nucleosidase	0.305	0.452	1.017	1.379	2.053	0.42473	0.49846	0.887725	0.975588	1.20564	1	1.17359	2.0901	2.29696	2.83861	396	532	761.5	892	1239	545.529	585.287	622.113	612.405	732.605	1	1.07288	1.14038	1.12259	1.34292											1284.42	1174.19	700.794	627.729	607.646
b0160	dgt, eck0159, jw0156, opta	deoxyguanosine triphosphate triphosphohydrolase (ec:3,1,5,1)	0.055	0.106	0.219	0.3	0.345	0.0758909	0.116768	0.191543	0.21202	0.202376	1	1.53863	2.52393	2.79374	2.66667
b0161	degp, eck0160, htra, jw0157, ptd	serine endoprotease (protease do), membrane-associated (ec:3,4,21,-)	0.172	0.186	0.43	0.518	0.643	0.239395	0.204828	0.375398	0.366595	0.377485	1	0.855607	1.56811	1.53134	1.57683	1382	1908.5	1929.5	1872	2153	1903.84	2099.66	1576.32	1285.23	1273.04	1	1.10286	0.827967	0.67507	0.668669											7952.72	10250.8	4199.06	3505.84	3372.43
b0162	cdar, eck0161, jw5013, sdar, yaeg	dna-binding transcriptional activator	0.128	0.236	0.222	0.297	0.28	0.178886	0.259779	0.193462	0.210513	0.1647	1	1.4522	1.08148	1.1768	0.920693
b0163	yaeh, eck0162, jw0159	conserved protein	0.306	0.441	0.672	0.775	1.219	0.426528	0.486442	0.586699	0.548247	0.715851	1	1.14047	1.37552	1.28537	1.67832	3295	3417	3472.5	3097.5	3148.5	4539.19	3759.26	2836.88	2126.6	1861.67	1	0.828179	0.624976	0.468497	0.410132											10642.2	7728.07	4835.33	3878.91	2600.64
b0164	yaei, eck0163, jw5014	predicted phosphatase	0.07	0.121	0.145	0.264	0.308	0.0980176	0.133201	0.126228	0.187055	0.180847	1	1.35895	1.28781	1.90839	1.84504
b0166	dapd, eck0164, jw0161, ssa	2,3,4,5-tetrahydropyridine-2-carboxylate n-succinyltransferase	0.319	0.544	1.182	1.814	2.456	0.44455	0.600267	1.03179	1.28414	1.44211	1	1.35028	2.32098	2.88864	3.24398	1712.5	3011	4308	5699.5	7680	2359.14	3312.59	3519.45	3913.01	4541.09	1	1.40415	1.49184	1.65866	1.92489	0.0337399	0.0649152	0.0966518	0.125776	0.151825	1	1.92399	2.86462	3.72782	4.49987	5306.8	5518.54	3411.01	3047.17	3148.92	0.717472	0.98309
b0167	glnd, eck0165, jw0162	uridylyltransferase (ec:2,7,7,59)	0.148	0.292	0.368	0.522	0.683	0.206412	0.322332	0.321064	0.369609	0.400801	1	1.5616	1.55545	1.79064	1.94175	15.5	19	22	21.5	22	21.3528	20.9031	17.9731	14.7609	13.0083	1	0.978941	0.841719	0.691286	0.609209											103.447	64.8496	55.9797	39.9365	32.4558
b0168	map, eck0166, jw0163, pepm	methionine aminopeptidase (ec:3,4,11,18)	0.263	0.331	1.017	1.421	2.354	0.366319	0.365016	0.887725	1.00536	1.38218	1	0.996441	2.42336	2.74449	3.77317	617	876.5	1294.5	1533.5	2205	849.979	964.294	1057.55	1052.83	1303.79	1	1.13449	1.24421	1.23865	1.53391											2320.32	2641.79	1191.3	1047.21	943.281
b0169	rpsb, eck0168, jw0164	30s ribosomal subunit protein s2	2.247	3.9	5.579	8.209	12.698	3.1292	4.30047	4.87139	5.80964	7.45633	1	1.3743	1.55675	1.85659	2.38282	8586.5	10996.5	18765.5	21942	29743	11828.8	12098	15330.6	15064.3	17586.7	1	1.02276	1.29605	1.27354	1.48677	0.556233	1.05669	1.55132	1.99067	2.37954	1	1.89972	2.78898	3.57885	4.27796	3780.12	2813.17	3147.07	2592.99	2358.62	2.35903	4.38177
b0170	tsf, eck0169, jw0165	protein chain elongation factor ef-ts	1.205	2.33	4.012	6.277	9.455	1.67739	2.56909	3.50316	4.44219	5.55206	1	1.5316	2.08846	2.64828	3.30994	6046.5	7882	12106	16180.5	21716.5	8329.66	8671.49	9890.08	11108.8	12840.7	1	1.04104	1.18733	1.33364	1.54156											4965.85	3375.31	2823.19	2500.74	2312.78
b0171	pyrh, eck0170, jw0166, smba, umk	uridylate kinase (ec:2,7,4,-)	0.328	0.586	1.384	2.226	3.356	0.457232	0.64638	1.20879	1.57526	1.97066	1	1.41368	2.64371	3.44521	4.30997	344.5	882	1221	1168	1985	474.583	970.345	997.505	801.894	1173.71	1	2.04463	2.10186	1.68968	2.47313	0.0172367	0.0367123	0.060437	0.0860381	0.110012	1	2.1299	3.5063	4.99157	6.38243	1037.95	1501.2	825.21	509.055	595.591	1.82203	1.89802
b0172	frr, eck0171, jw0167, rrf	ribosome recycling factor	0.949	0.922	2.263	2.806	3.384	1.32093	1.01655	1.97551	1.98577	1.9868	1	0.769567	1.49554	1.50331	1.50409	3026.5	3582.5	4587.5	5420	7087.5	4169.3	3941.34	3747.79	3721.12	4190.75	1	0.945323	0.898901	0.892503	1.00514											3156.33	3877.18	1897.13	1873.89	2109.29
b0173	dxr, eck0172, ispc, jw0168, yaem	1-deoxy-d-xylulose 5-phosphate reductoisomerase (ec:1,1,1,267)	0.136	0.229	0.309	0.446	0.816	0.189951	0.252177	0.269751	0.315476	0.479028	1	1.32759	1.42011	1.66083	2.52185
b0174	ispu, eck0173, jw0169, rth, upps, yaes	undecaprenyl pyrophosphate synthase (ec:2,5,1,31)	0.335	0.531	0.784	1.032	1.769	0.466708	0.586034	0.684113	0.730493	1.03844	1	1.25568	1.46583	1.5652	2.22502
b0175	cdsa, eck0174, jw5810	cdp-diglyceride synthase (ec:2,7,7,41)	0.306	0.596	0.75	1.023	1.585	0.425899	0.656933	0.654748	0.723871	0.930789	1	1.54246	1.53733	1.69963	2.18547
b0176	rsep, ecfe, eck0175, jw0171, yael	zinc metallopeptidase (ec:3,4,24,-)	0.73	1.303	1.452	1.885	2.892	1.01635	1.43676	1.26779	1.33437	1.69831	1	1.41364	1.24739	1.3129	1.67099
b0177	bama, ecfk, eck0176, jw0172, omp85, yaet, yzzn, yzzy	conserved protein	0.757	1.767	1.825	2.696	4.004	1.05404	1.94798	1.59352	1.90818	2.35136	1	1.8481	1.51182	1.81034	2.2308	357	456	586.5	591.5	717	491.803	501.675	479.145	406.096	423.953	1	1.02007	0.974263	0.825729	0.862038											466.587	257.536	300.683	212.819	180.301
b0178	skp, eck0177, hlpa, jw0173, omph	periplasmic chaperone	1.307	2.419	2.778	4.536	6.974	1.81955	2.66721	2.42527	3.21007	4.09488	1	1.46587	1.3329	1.76421	2.2505	5847.5	7383	8696.5	9736.5	12629.5	8055.51	8122.51	7104.67	6684.62	7467.66	1	1.00832	0.881964	0.829819	0.927025											4427.21	3045.32	2929.44	2082.39	1823.66
b0179	lpxd, eck0178, fira, jw0174, omsa, ssc	udp-3-o-(3-hydroxymyristoyl)-glucosamine n-acyltransferase	0.665	0.984	1.771	2.405	3.571	0.925679	1.08499	1.54605	1.70217	2.09696	1	1.1721	1.67018	1.83884	2.26532	800.5	913	1142	1255	1256	1102.77	1004.45	932.965	861.624	742.657	1	0.910844	0.846021	0.781328	0.673448											1191.31	925.771	603.452	506.19	354.159
b0180	fabz, eck0179, jw0175, saba, sefa, sfhc, yaea	(3r)-hydroxymyristol acyl carrier protein dehydratase (ec:4,2,1,-)	0.628	0.913	1.796	2.369	3.818	0.874525	1.00723	1.56827	1.67631	2.24193	1	1.15174	1.79329	1.91682	2.56359	1443.5	2441	3813	5022.5	6854.5	1988.56	2685.5	3115.06	3448.21	4052.98	1	1.35047	1.56649	1.73402	2.03814	0.215833	0.41454	0.616032	0.80016	0.964627	1	1.92065	2.8542	3.70731	4.46932	2273.88	2666.22	1986.3	2057.03	1807.81	5.44495	7.74384
b0181	lpxa, eck0180, jw0176	udp-n-acetylglucosamine acetyltransferase (ec:2,3,1,129)	0.535	0.824	1.461	1.915	2.476	0.744424	0.908367	1.27547	1.35512	1.45359	1	1.22023	1.71337	1.82036	1.95263	771.5	932.5	1049.5	1246	996	1062.82	1025.9	857.397	855.445	588.922	1	0.965267	0.80672	0.804884	0.554114											1427.7	1129.39	672.219	631.268	405.151
b0182	lpxb, eck0181, jw0177, pgsb	tetraacyldisaccharide-1-p synthase (ec:2,4,1,182)	0.216	0.327	0.575	0.751	0.972	0.300714	0.360357	0.502177	0.5317	0.570883	1	1.19834	1.66995	1.76813	1.89843	490		553	523	526	675.024		451.777	359.067	311.017	1		0.669276	0.531933	0.46075											2244.74		899.638	675.319	544.8
b0183	rnhb, eck0182, jw0178	ribonuclease hii, degrades rna of dna-rna hybrids (ec:3,1,26,4)	0.159	0.293	0.551	0.782	1.147	0.221886	0.322826	0.481324	0.553353	0.673513	1	1.45492	2.16924	2.49386	3.0354
b0184	dnae, eck0183, jw0179, polc, sdgc	dna polymerase iii alpha subunit (ec:2,7,7,7)	0.327	0.402	0.718	1.023	1.402	0.455284	0.443516	0.626486	0.723871	0.823142	1	0.974153	1.37603	1.58993	1.80798
b0185	acca, eck0184, jw0180	acetyl-coa carboxylase, carboxytransferase, alpha subunit	0.554	0.622	1.428	2.025	2.981	0.771739	0.685383	1.24666	1.43301	1.75034	1	0.888103	1.61539	1.85686	2.26804	1524	1902.5	2154.5	2384.5	3066	2099.46	2093.06	1760.13	1637.09	1812.89	1	0.996952	0.838374	0.779764	0.863501	0.0307256	0.0588168	0.0870852	0.112704	0.135527	1	1.91426	2.83428	3.66808	4.41088	2720.43	3053.86	1411.88	1142.41	1035.74	0.73419	1.40973
b0186	ldcc, eck0185, jw0181, ldc, ldch	lysine decarboxylase 2, constitutive (ec:4,1,1,18)	0.159	0.315	0.311	0.445	0.647	0.221315	0.347847	0.271941	0.314872	0.379993	1	1.57173	1.22875	1.42273	1.71698
b0187	yaer, eck0186, jw0182	predicted lyase	0.097	0.171	0.267	0.362	0.489	0.135379	0.188395	0.232977	0.25593	0.287062	1	1.39162	1.72093	1.89048	2.12043	230.5	212	274	306	396	317.537	233.235	223.846	210.085	234.15	1	0.734513	0.704946	0.661609	0.737394											2345.54	1238.01	960.808	820.869	815.678
b0188	tils, eck0187, jw0183, mesj, yaen	trna(ile)-lysidine synthetase (ec:6,1,1,5)	0.096	0.097	0.235	0.337	0.417	0.13406	0.106708	0.205539	0.238184	0.245079	1	0.795974	1.53318	1.7767	1.82813
b0189	rof, eck0188, jw0184, mesj, yaeo	modulator of rho-dependent transcription termination	0.126	0.168	0.325	0.378	0.451	0.175589	0.185452	0.283467	0.267352	0.264811	1	1.05617	1.61438	1.5226	1.50813	542	669	964	1083	1391	746.659	736.01	787.547	743.537	822.48	1	0.985738	1.05476	0.995818	1.10155											4252.32	3968.74	2778.27	2781.11	3105.92
b0190	yaeq, eck0190, jw0186	conserved protein	0.236	0.297	0.458	0.793	0.98	0.3283	0.327977	0.399543	0.561175	0.575189	1	0.999017	1.21701	1.70934	1.75202
b0191	yaej, eck0191, jw0187	conserved protein	0.138	0.188	0.285	0.398	0.535	0.19232	0.207529	0.248619	0.28149	0.314328	1	1.07908	1.29273	1.46365	1.6344
b0192	nlpe, cutf, eck0192, jw0188	lipoprotein involved with copper homeostasis and adhesion	0.19	0.294	0.382	0.47	0.73	0.264883	0.324047	0.333413	0.332916	0.428789	1	1.22336	1.25872	1.25684	1.61879
b0193	yaef, eck0193, jw5016, yaek	predicted lipoprotein	0.166	0.242	0.219	0.385	0.542	0.23079	0.267381	0.190992	0.27217	0.318279	1	1.15855	0.827556	1.1793	1.37908
b0194	pros, drpa, eck0194, jw0190	prolyl-trna synthetase (ec:6,1,1,15)	0.356	0.39	1.22	1.653	2.68	0.495313	0.430019	1.065	1.16987	1.57344	1	0.868177	2.15016	2.36188	3.17666	1668	2350.5	3368	4060	5049	2297.84	2585.94	2751.51	2787.4	2985.41	1	1.12538	1.19744	1.21306	1.29923	0.0240086	0.04557	0.066836	0.08568	0.102346	1	1.89807	2.78384	3.56872	4.26287	4639.16	6013.53	2583.57	2382.66	1897.38	0.524159	0.884049
b0195	yaeb, eck0195, jw0191	conserved protein	0.075	0.076	0.245	0.346	0.435	0.104946	0.0834017	0.214314	0.245104	0.255478	1	0.794712	2.04214	2.33553	2.43438
b0196	rcsf, eck0196, jw0192	predicted outer membrane protein, signal	0.401	0.252	1.009	1.351	1.475	0.55828	0.277684	0.880596	0.956046	0.866201	1	0.497392	1.57734	1.71248	1.55155
b0197	metq, eck0197, jw0193, metd, yaec	dl-methionine transporter subunit	1.71	3.99	4.865	7.177	11.566	2.38133	4.39957	4.24737	5.07945	6.79108	1	1.84752	1.78361	2.13303	2.8518	6739.5	9574.5	13371	16092	14854.5	9284.33	10533.5	10923.5	11048	8783.28	1	1.13455	1.17656	1.18996	0.946032											3898.8	2394.22	2571.83	2175.04	1293.36
b0198	meti, eck0198, jw0194, metd, yaee	dl-methionine transporter subunit	0.706	1.434	1.949	3.076	5.298	0.98325	1.58075	1.70164	2.17704	3.11099	1	1.60768	1.73063	2.21412	3.16399
b0199	metn, abc, eck0199, jw0195, metd	dl-methionine transporter subunit	0.365	0.194	1.188	1.804	2.799	0.508687	0.213416	1.03756	1.27693	1.64377	1	0.419544	2.03967	2.51024	3.23139	221	297	523	658.5	828	304.449	326.749	427.269	452.095	489.586	1	1.07324	1.40341	1.48496	1.6081											598.501	1531.04	411.803	354.049	297.844
b0200	gmhb, eck0200, gmbc, gmbx, jw0196, wcbn, yaed	d,d-heptose 1,7-bisphosphate phosphatase	0.677	0.878	1.168	1.762	2.607	0.94292	0.968226	1.02	1.24715	1.53074	1	1.02684	1.08174	1.32265	1.6234
b0201	rrsh, eck0201, jwr0001	16s ribosomal rna of rrnh operon	5.938	17.729	19.576	29.746	38.329	8.26823	19.5489	17.0919	21.0513	22.5064	1	2.36434	2.06717	2.54605	2.72204
b0204	rrlh, eck0204, jwr0004	23s ribosomal rna of rrnh operon	4.652	15.848	16.721	27.897	36.04	6.47822	17.4746	14.5996	19.7428	21.1623	1	2.69744	2.25365	3.04756	3.26668
b0207	dkgb, eck0207, jw0197, yafb	2,5-diketo-d-gluconate reductase b (ec:1,1,1,274)	0.111	0.141	0.26	0.302	0.42	0.155229	0.155772	0.226663	0.213824	0.246866	1	1.0035	1.46019	1.37748	1.59034	310.5	534	471	254.5	221.5	427.745	587.488	384.787	174.728	130.97	1	1.37345	0.899571	0.408486	0.306188											2755.58	3771.46	1697.62	817.156	530.531
b0208	yafc, eck0208, jw0198	predicted dna-binding transcriptional regulator	0.062	0.08	0.195	0.244	0.277	0.086535	0.0878172	0.170139	0.17262	0.162902	1	1.01482	1.96613	1.9948	1.8825	28	28.5	31	27	33.5	38.5728	31.3547	25.3257	18.5369	19.8081	1	0.81287	0.656568	0.48057	0.513526											445.748	357.045	148.853	107.386	121.595
b0209	yafd, eck0209, jw5017	conserved protein	0.288	0.327	0.515	0.686	0.756	0.401461	0.360843	0.449761	0.48539	0.44386	1	0.898824	1.12031	1.20906	1.10561
b0210	yafe, eck0210, jw0200	predicted s-adenosyl-l-methionine-dependent methyltransferase	0.059	0.151	0.17	0.193	0.286	0.0820086	0.166075	0.148735	0.136838	0.167929	1	2.02509	1.81365	1.66859	2.0477
b0211	mltd, dnir, eck0211, jw5018, yafg	predicted membrane-bound lytic murein transglycosylase d	0.77	0.617	1.449	1.731	1.988	1.07176	0.680725	1.26505	1.2252	1.16761	1	0.635145	1.18035	1.14317	1.08943
b0212	glob, eck0212, jw0202, yafr	predicted hydroxyacylglutathione hydrolase	0.218	0.376	0.472	0.558	0.695	0.303052	0.414322	0.412172	0.395169	0.407981	1	1.36716	1.36007	1.30396	1.34624	470.5	517	466	546.5	444	648.161	568.785	380.702	375.201	262.532	1	0.877537	0.587358	0.578871	0.405041											2138.77	1372.81	923.649	949.471	643.489
b0213	yafs, eck0213, jw0203	predicted s-adenosyl-l-methionine-dependent methyltransferase	0.036	0.062	0.156	0.178	0.203	0.0502245	0.0684405	0.135835	0.125705	0.119488
b0214	rnha, cer, dasf, eck0214, hera, jw0204, rnh, sdra, sin	ribonuclease hi, degrades rna of dna-rna hybrids (ec:3,1,26,4)	0.095	0.154	0.286	0.4	0.634	0.131812	0.17024	0.249994	0.283294	0.372458	1	1.29154	1.89659	2.14923	2.82567
b0215	dnaq, eck0215, jw0205, mutd	dna polymerase iii epsilon subunit (ec:2,7,7,7)	0.217	0.131	0.54	0.647	0.678	0.302093	0.144733	0.471717	0.458026	0.397938	1	0.479102	1.5615	1.51618	1.31727
b0217	yaft, eck0217, jw0206	predicted aminopeptidase	0.022	0.047	0.073	0.111	0.166	0.0305544	0.0517572	0.0636612	0.0784924	0.0976033
b0218	yafu, eck0218, jw0207	pseudogene	0.011	0.02	0.023	0.04	0.052	0.0146615	0.0223204	0.0203094	0.0279685	0.0304963
b0219	yafv, eck0220, jw5019	predicted c-n hydrolase family amidase, nad(p)-binding	0.307	0.384	0.538	0.687	0.947	0.427309	0.423889	0.469799	0.486292	0.556178	1	0.991998	1.09944	1.13803	1.30159
b0220	ivy, eck0221, jw0210, ykfe	inhibitor of vertebrate c-lysozyme	0.407	0.667	0.895	1.025	1.902	0.566615	0.735426	0.781256	0.72508	1.11702	1	1.29793	1.37881	1.27967	1.97139	1175	1496	1778	1526	2030.5	1618.68	1645.85	1452.55	1047.68	1200.61	1	1.01678	0.897367	0.647243	0.741721											2856.76	2237.95	1859.25	1444.92	1074.83
b0221	fade, eck0222, fadf, jw5020, yafh	acyl coenzyme a dehydrogenase (ec:1,3,99,3)	0.269	0.582	0.402	0.372	0.214	0.375045	0.641478	0.350972	0.263446	0.125591	1	1.7104	0.935814	0.702438	0.334871	202.5	269	262.5	187.5	95.5	278.964	295.944	214.451	128.729	56.4679	1	1.06087	0.768742	0.461453	0.20242											743.815	461.347	611.021	488.635	449.616
b0222	lpca, eck0223, gmha, isn, jw0212, tfra, yafi	d-sedoheptulose 7-phosphate isomerase (ec:5,-,-,-)	0.451	0.42	1.168	1.464	1.637	0.628564	0.463629	1.01972	1.03634	0.96093	1	0.737601	1.62231	1.64875	1.52877	1990	2485	2710	2811	2810.5	2741.42	2733.91	2213.95	1929.9	1661.81	1	0.997259	0.807593	0.703977	0.606186											4361.41	5896.76	2171.13	1862.22	1729.38
b0223	yafj, eck0224, jw0213	predicted amidotransfease	0.206	0.274	0.489	0.676	0.728	0.286921	0.301727	0.42671	0.47847	0.427358	1	1.0516	1.4872	1.6676	1.48946
b0224	yafk, eck0225, jw0214	conserved protein	0.446	0.278	0.911	1.214	1.759	0.621637	0.306635	0.795522	0.859203	1.03305	1	0.493271	1.27972	1.38216	1.66183
b0225	yafq, eck0226, jw0215	predicted toxin of the yafq-dinj toxin-antitoxin system	0.098	0.268	0.359	0.456	0.887	0.136698	0.295839	0.313655	0.322694	0.520655	1	2.16418	2.2945	2.36063	3.80879
b0226	dinj, eck0227, jw0216, sosa	predicted antitoxin of yafq-dinj toxin-antitoxin system	0.278	0.615	0.614	0.835	1.753	0.386559	0.677781	0.536201	0.590651	1.0291	1	1.75337	1.38711	1.52797	2.66222
b0227	yafl, eck0228, jw0217	predicted lipoprotein and c40 family peptidase	0.057	0.061	0.091	0.124	0.155	0.0789493	0.0677045	0.0790311	0.0875145	0.0911445
b0228	yafm, eck0229, jw0218	conserved protein	0.187	0.308	0.332	0.496	0.62	0.260564	0.339752	0.289509	0.351258	0.364201	1	1.30391	1.11109	1.34807	1.39774
b0229	lfha, eck0230, fhia, jw5811	pseudogene	0.037	0.04	0.054	0.074	0.082	0.0511537	0.0446482	0.0471964	0.052626	0.048441
b0230	lafu, eck0231, jw5812, mbha	pseudogene	0.038	0.045	0.063	0.086	0.123	0.0530427	0.0493066	0.0546056	0.0610526	0.0724785
b0231	dinb, dinp, eck0232, jw0221	dna polymerase iv (ec:2,7,7,7)	0.049	0.077	0.113	0.144	0.169	0.0684247	0.0846307	0.0990606	0.101652	0.099035	1	1.23684	1.44773	1.48561
b0232	yafn, eck0233, jw0222	predicted antitoxin of the yafo-yafn toxin-antitoxin system	0.057	0.115	0.189	0.27	0.382	0.0792794	0.126335	0.164648	0.190971	0.22426	1	1.59354	2.07681	2.40884	2.82874
b0233	yafo, eck0234, jw0223	predicted toxin of the yafo-yafn toxin-antitoxin system	0.031	0.057	0.104	0.15	0.197	0.0433278	0.0630462	0.0908282	0.105856	0.115537
b0234	yafp, eck0235, jw0224	predicted acyltransferase with acyl-coa n-acyltransferase domain	0.054	0.078	0.115	0.173	0.276	0.0754699	0.0856094	0.100164	0.122701	0.161825	1	1.13435	1.3272	1.62582	2.14424
b0235	ykfj, eck0236, jw0225	pseudogene	0.025	0.022	0.037	0.045	0.058	0.0349612	0.0240425	0.0321064	0.0318751	0.0340917
b0236	prfh, eck0237, jw0226	pseudogene	0.038	0.037	0.055	0.082	0.105	0.0522925	0.0407184	0.0482995	0.0577415	0.0617139
b0237	pepd, eck0238, jw0227, peph	aminoacyl-histidine dipeptidase (peptidase d) (ec:3,4,13,3)	0.311	0.541	1.083	1.517	1.86	0.432615	0.59683	0.945904	1.07363	1.09226	1	1.37959	2.18648	2.48173	2.52478	1723.5	2380.5	3199.5	3201	3425.5	2374.29	2618.94	2613.85	2197.66	2025.45	1	1.10304	1.1009	0.925604	0.853077											5488.24	4388.08	2763.34	2046.94	1854.37
b0238																		854.5	1548.5	1396	2552	1881	1177.16	1703.6	1140.47	1752.08	1112.21	1	1.44722	0.968835	1.4884	0.944827
b0239	frsa, eck0240, jw0229, yafa	hydrolase, binds to enzyme iia(glc)	0.211	0.255	0.475	0.655	0.874	0.293129	0.281121	0.414642	0.463439	0.51312	1	0.959036	1.41454	1.58101	1.75049	92.5	92	116.5	126	141.5	127.428	101.215	95.1755	86.5057	83.6671	1	0.794293	0.746897	0.678859	0.656584											434.717	360.041	229.537	186.66	163.056
b0240	crl, eck0241, jw0230	dna-binding transcriptional regulator	0.514	0.668	1.586	2.189	2.32	0.715158	0.736655	1.38496	1.54939	1.36245	1	1.03006	1.93658	2.16651	1.90511	445	833	1701	1858	2539	613.032	916.437	1389.64	1275.62	1501.28	1	1.49493	2.26684	2.08083	2.44894											857.198	1244.05	1003.38	823.299	1101.89
b0241	phoe, eck0242, jw0231, ompe	outer membrane phosphoporin protein e	0.143	0.18	0.378	0.47	0.924	0.199516	0.198941	0.330391	0.332311	0.54254	1	0.997116	1.65596	1.66559	2.71927
b0242	prob, eck0243, jw0232, pro	gamma-glutamate kinase (ec:2,7,2,11)	0.361	0.341	0.898	1.177	1.644	0.50317	0.376055	0.784277	0.833039	0.965591	1	0.747371	1.55867	1.65558	1.91902	271	376.5	465.5	485.5	552	373.329	414.212	380.294	333.321	326.391	1	1.10951	1.01865	0.892834	0.874269	0.0240086	0.04557	0.066836	0.08568	0.102346	1	1.89807	2.78384	3.56872	4.26287	741.955	1101.47	484.897	400.127	338.021	3.22619	5.51915
b0243	proa, eck0244, jw0233, pro	gamma-glutamylphosphate reductase (ec:1,2,1,41)	0.617	0.908	1.209	1.533	2.443	0.859563	1.00085	1.05567	1.08476	1.43458	1	1.16437	1.22814	1.26199	1.66896	541.5	753.5	786	755	729.5	745.97	828.974	642.128	518.347	431.344	1	1.11127	0.860796	0.694863	0.578232	0.0240086	0.04557	0.066836	0.08568	0.102346	1	1.89807	2.78384	3.56872	4.26287	867.848	828.27	608.268	477.847	300.677	1.61458	2.75774
b0244	thrw, eck0245, jwr0008	trna-thr	0.807	0.664	1.524	1.875	1.652	1.12316	0.732239	1.33036	1.32715	0.969897	1	0.651948	1.18448	1.18163	0.863546																0.0327204	0.0618576	0.0903154	0.115248	0.137216	1	1.89049	2.76022	3.52221	4.19358
b0245	ykfi, eck0246, jw0234	cp4-6 prophage; toxin of the ykfi-yafw toxin-antitoxin system	0.019	0.012	0.03	0.041	0.077	0.0269257	0.0130037	0.026072	0.0288708	0.0452116
b0246	yafw, eck0247, jw0235	cp4-6 prophage; antitoxin of the ykfi-yafw toxin-antitoxin system	0.066	0.021	0.044	0.057	0.073	0.0921724	0.0235494	0.0381407	0.039995	0.0430587
b0247	ykfg, eck0249, jw0236	cp4-6 prophage; predicted dna repair protein	0.074	0.048	0.083	0.113	0.141	0.103086	0.0527433	0.0727169	0.0799991	0.082888
b0248	yafx, eck0250, jw5022	cp4-6 prophage; predicted protein	0.04	0.027	0.038	0.055	0.065	0.0555911	0.0296796	0.0334812	0.0387951	0.0383976
b0249	ykff, eck0251, jw5023	cp4-6 prophage; predicted protein	0.065	0.028	0.035	0.052	0.06	0.0901026	0.0304155	0.0304599	0.0366929	0.0351682
b0250	ykfb, eck0252, jw0239	cp4-6 prophage; predicted protein	0.29	0.552	0.617	0.742	0.641	0.403351	0.608362	0.538399	0.524789	0.376408	1	1.50827	1.33482	1.30107	0.933202
b0251	yafy, eck0253, jw0240	cp4-6 prophage; predicted dna-binding transcriptional regulator	0.047	0.055	0.092	0.126	0.138	0.0660851	0.0610813	0.0806776	0.0890212	0.0810903	1
b0252	yafz, eck0254, jw0242	cp4-6 prophage; conserved protein	0.13	0.209	0.164	0.301	0.395	0.180955	0.230836	0.143516	0.21322	0.231796	1	1.27565	0.793099	1.1783	1.28096
b0253	ykfa, eck0255, jw0243	cp4-6 prophage; predicted gtp-binding protein	0.213	0.278	0.269	0.374	0.513	0.295916	0.306878	0.235175	0.264348	0.301056	1	1.03704	0.794735	0.893319	1.01737
b0254	perr, eck0256, jw0244	cp4-6 prophage; predicted dna-binding transcriptional regulator	0.023	0.048	0.078	0.114	0.153	0.0319928	0.0524931	0.068329	0.0809013	0.090068
b0256	insi, eck0258	kple2 phage-like element; is30 transposase	0.166	0.142	0.268	0.384	0.579	0.23121	0.156258	0.234072	0.271566	0.340164	1	0.675824	1.01238	1.17454	1.47123	232					319.603																				1382.3
b0258	ykfc, eck0260, jw5813	pseudogene	0.04	0.083	0.112	0.145	0.166	0.0550811	0.091747	0.0979657	0.102554	0.0972373	1	1.66567	1.77857	1.86188
b0260	mmup, eck0262, jw5027, ykfd	cp4-6 prophage; predicted s-methylmethionine transporter	0.108	0.179	0.268	0.417	0.733	0.150731	0.197469	0.234352	0.295023	0.430232	1	1.31008	1.55477	1.95728	2.8543
b0261	mmum, eck0263, jw0253, yagd	cp4-6 prophage; s-methylmethionine:homocysteine methyltransferase	0.261	0.52	0.486	0.699	1.146	0.362782	0.573038	0.423969	0.494412	0.673147	1	1.57956	1.16866	1.36283	1.85551	58	70	70		74	79.9008	77.0115	57.187		43.7553	1	0.963839	0.715725		0.54762											220.244	134.392	134.885		65.001
b0262	afuc, eck0264, fbpc, jw0254, yagc	cp4-6 prophage; predicted ferric transporter subunit	0.109	0.118	0.121	0.204	0.269	0.151211	0.130258	0.105926	0.144354	0.158241	1	0.861427	0.700519	0.954649	1.04649
b0263	afub, eck0265, fbpb, jw0255	pseudogene	0.072	0.112	0.126	0.21	0.241	0.100448	0.123877	0.110043	0.148865	0.141372	1	1.23325	1.09552	1.48201	1.40742
b0266	yagb, eck0267, jw0259	pseudogene	0.092	0.094	0.221	0.292	0.329	0.128483	0.103765	0.19291	0.206606	0.193043	1	0.807614	1.50144	1.60805	1.50248
b0267	yaga, eck0268, jw0260	cp4-6 prophage; predicted dna-binding transcriptional regulator	0.08	0.125	0.096	0.174	0.227	0.110942	0.138353	0.0836989	0.123305	0.133482	1	1.24707	0.754438	1.11144	1.20317
b0268	yage, eck0269, jw0261	cp4-6 prophage; predicted lyase/synthase	0.077	0.092	0.126	0.16	0.092	0.107794	0.1018	0.110314	0.113074	0.0538234	1	0.944394	1.02338	1.04899
b0269	yagf, eck0270, jw0262	cp4-6 prophage; predicted dehydratase	0.301	0.343	0.355	0.571	0.851	0.419691	0.377769	0.31009	0.404191	0.499836	1	0.900112	0.738853	0.963067	1.19096
b0270	yagg, eck0271, jw0263	cp4-6 prophage; predicted sugar transporter	0.053	0.05	0.07	0.085	0.104	0.0735818	0.0551939	0.0614714	0.0601504	0.0610034
b0271	yagh, eck0272, jw0264	cp4-6 prophage; predicted xylosidase/arabinosidase	0.058	0.078	0.087	0.116	0.159	0.0806584	0.0861025	0.0762897	0.082399	0.0932974	1	1.0675
b0272	yagi, eck0273, jw0265	cp4-6 prophage; predicted dna-binding transcriptional regulator	0.164	0.219	0.464	0.655	1.22	0.22779	0.241139	0.404763	0.463439	0.716206	1	1.0586	1.77691	2.0345	3.14414
b0273	argf, arg5, argd, eck0274, jw0266	cp4-6 prophage; ornithine carbamoyltransferase 2, chain f	1.323	1.098	1.677	2.84	5.961	1.84179	1.21108	1.46427	2.01013	3.49995	1	0.657555	0.795026	1.0914	1.9003																0.0307784	0.0594468	0.0888832	0.116144	0.140596	1	1.93144	2.88784	3.77355	4.568
b0276	yagj, eck0275, jw0270	cp4-6 prophage; predicted protein	1.485	1.044	1.904	2.669	4.462	2.06731	1.15147	1.66212	1.88863	2.61977	1	0.556991	0.804004	0.913568	1.26724
b0277	yagk, eck0276, jw0271	cp4-6 prophage; conserved protein	0.025	0.044	0.076	0.108	0.123	0.0349612	0.0483278	0.0661309	0.0760835	0.0724785
b0278	yagl, eck0277, jw0272	cp4-6 prophage; dna-binding protein	0.007	0.015	0.03	0.04	0.079	0.0100451	0.0166833	0.0257921	0.0282663	0.0462881
b0279	yagm, eck0278, jw0273	cp4-6 prophage; predicted protein	0.007	0.018	0.022	0.032	0.054	0.00965558	0.0203629	0.0192062	0.0225553	0.0319388
b0280	yagn, eck0279, jw0274	cp4-6 prophage; predicted protein	0.926	0.561	1.228	1.511	1.594	1.28963	0.618665	1.07241	1.06942	0.936171	1	0.479723	0.831565	0.829244	0.725922
b0281	intf, eck0280, jw0275, yago	cp4-6 prophage; predicted phage integrase	0.083	0.122	0.249	0.376	0.463	0.115561	0.13443	0.217064	0.265855	0.271991	1	1.16328	1.87835	2.30055	2.35365
b0283	yagq, eck0282, jw0277	conserved protein	0.059	0.085	0.088	0.119	0.167	0.0823369	0.0937045	0.077113	0.0839056	0.0983138	1	1.13806
b0284	yagr, eck0283, jw0278	predicted oxidoreductase with molybdenum-binding domain	0.106	0.093	0.108	0.135	0.237	0.147282	0.10205	0.0941211	0.0956344	0.13922	1	0.692886	0.639053	0.649327	0.945257
b0285	yags, eck0284, jw0279	predicted oxidoreductase with fad-binding domain	0.058	0.058	0.081	0.114	0.139	0.0804785	0.0642678	0.0710704	0.0809013	0.0814563
b0286	yagt, eck0285, jw0280	predicted xanthine dehydrogenase, 2fe-2s subunit	0.078	0.08	0.135	0.171	0.215	0.108752	0.0880674	0.118275	0.120896	0.126302	1	0.809803	1.08757	1.11167	1.16138
b0287	yagu, eck0286, jw0281	conserved inner membrane protein	0.344	0.44	1.495	2.443	5.019	0.478611	0.485464	1.30511	1.72864	2.94701	1	1.01432	2.72687	3.61178	6.15743
b0288	ykgj, eck0287, jw0282	predicted ferredoxin	0.026	0.026	0.091	0.14	0.136	0.0359516	0.0282078	0.0798544	0.0989455	0.0796586
b0289	yagv, eck0288, jw5030	conserved protein	0.038	0.068	0.103	0.127	0.158	0.0526523	0.0750637	0.0897332	0.0899234	0.0925762
b0290	yagw, eck0289, jw0284	predicted receptor	0.105	0.154	0.168	0.295	0.358	0.146653	0.169997	0.147088	0.208709	0.210266	1	1.15918	1.00297	1.42314	1.43376
b0291	yagx, eck0290, jw0285	predicted aromatic compound dioxygenase	0.034	0.034	0.043	0.07	0.097	0.0472264	0.0370388	0.0378691	0.0496216	0.0566975
b0292	matc, eck0291, jw0286, yagy	predicted protein	0.029	0.043	0.06	0.084	0.122	0.0406886	0.0473417	0.0521358	0.0592482	0.0717681
b0293	matb, eck0292, jw0287, yagz	conserved protein	0.024	0.053	0.095	0.123	0.197	0.0337631	0.0586307	0.0831473	0.08691	0.115903
b0294	mata, eck0293, jw5031, ykgk	predicted regulator	0.026	0.079	0.078	0.124	0.182	0.0367918	0.0865956	0.0677774	0.0878122	0.106926
b0295	ykgl, eck0294, jw5033	predicted protein	0.073	0.111	0.129	0.21	0.32	0.101152	0.122898	0.112784	0.148414	0.187844	1	1.21498	1.11499	1.46723	1.85703
b0296	ykgm, eck0296, jw5035	rpmj (l36) paralog	0.014	0.031	0.05	0.075	0.115	0.0192509	0.0343453	0.0436318	0.0529327	0.0674622
b0297	eaeh, eck0297, jw0291	pseudogene	0.014	0.02	0.019	0.034	0.046	0.0194299	0.0218347	0.0164648	0.0243597	0.0269117
b0300	ykga, eck0300, jw5037	pseudogene	0.042	0.059	0.144	0.191	0.198	0.0584093	0.0652539	0.125684	0.135332	0.116258	1		2.15178	2.31695	1.99041
b0301	ykgb, eck0301, jw5038	conserved inner membrane protein	0.031	0.059	0.081	0.12	0.182	0.0425182	0.0647609	0.0707987	0.0851056	0.106926
b0303	ykgi, eck0302, jw5039	predicted protein	0.01	0.019	0.06	0.072	0.13	0.0143323	0.0206057	0.0521358	0.0511283	0.076074
b0304	ykgc, eck0303, jw5040	predicted oxidoreductase with fad/nad(p)-binding domain and	0.093	0.11	0.202	0.256	0.362	0.130012	0.121184	0.176725	0.181047	0.212785	1	0.932096	1.3593	1.39254	1.63666
b0305	ykgd, eck0304, jw0298	predicted dna-binding transcriptional regulator	0.021	0.031	0.059	0.071	0.068	0.0287545	0.0338523	0.0515925	0.0502261	0.0398293
b0306	ykge, eck0305, jw5041	predicted oxidoreductase	0.038	0.102	0.14	0.134	0.115	0.0534322	0.112596	0.122111	0.0947322	0.0678174
b0307	ykgf, eck0306, jw0300	predicted amino acid dehydrogenase with nad(p)-binding domain and	0.077	0.162	0.186	0.204	0.195	0.107374	0.178585	0.16273	0.144056	0.114461	1	1.66322	1.51555	1.34163	1.066
b0308	ykgg, eck0307, jw5042	predicted transporter	0.103	0.204	0.235	0.301	0.411	0.143235	0.224948	0.205539	0.21322	0.241129	1	1.57048	1.43497	1.4886	1.68345
b0310	ykgh, eck0308, jw0302	predicted inner membrane protein	0.007	0.016	0.018	0.025	0.038	0.00935514	0.0181551	0.0153699	0.0177465	0.0222506
b0311	beta, eck0309, jw0303	choline dehydrogenase, a flavoprotein (ec:1,1,99,1)	0.126	0.22	0.247	0.397	0.629	0.176128	0.242117	0.215417	0.281192	0.369228	1	1.37466	1.22307	1.59652	2.09636
b0312	betb, eck0310, jw0304	betaine aldehyde dehydrogenase, nad-dependent (ec:1,2,1,8)	0.11	0.221	0.342	0.478	0.667	0.153341	0.243589	0.298836	0.338329	0.391834	1	1.58855	1.94884	2.20639	2.55532
b0313	beti, eck0311, jw0305	dna-binding transcriptional repressor	0.102	0.181	0.38	0.583	0.739	0.142517	0.199434	0.331494	0.412311	0.434172	1	1.39937	2.32601	2.89307	3.04646
b0314	bett, eck0312, jw0306	choline transporter of high affinity	0.086	0.154	0.18	0.232	0.342	0.120117	0.169754	0.157511	0.164202	0.200578	1	1.41324	1.31131	1.36702	1.66985
b0315	yaha, eck0313, jw0307	predicted dna-binding transcriptional regulator	0.128	0.202	0.241	0.394	0.499	0.177867	0.222247	0.210198	0.279081	0.292799	1	1.24951	1.18177	1.56904	1.64617
b0316	yahb, eck0314, jw0308	predicted dna-bindng transcriptional regulator	0.076	0.12	0.143	0.215	0.313	0.105396	0.132708	0.124861	0.152474	0.184076	1	1.25914	1.18469	1.44668	1.74653
b0317	yahc, eck0315, jw0309	predicted inner membrane protein	0.154	0.219	0.211	0.35	0.445	0.21439	0.241624	0.184134	0.24781	0.261226	1	1.12703	0.858875	1.15589	1.21846
b0318	yahd, eck0316, jw0310	predicted transcriptional regulator with ankyrin domain	0.054	0.105	0.089	0.109	0.153	0.0756507	0.116032	0.0779362	0.0772924	0.089702	1	1.53379
b0319	yahe, eck0317, jw0311	predicted protein	0.021	0.044	0.036	0.051	0.07	0.0296855	0.0485706	0.0312832	0.0363862	0.0409058
b0320	yahf, eck0318, jw0312	predicted acyl-coa synthetase with nad(p)-binding domain and	0.032	0.047	0.048	0.064	0.082	0.0439566	0.0517572	0.0419853	0.0451106	0.048441
b0321	yahg, eck0319, jw0313	conserved protein	0.047	0.052	0.066	0.084	0.098	0.0650047	0.0574017	0.0576269	0.0595459	0.057774
b0323	yahi, eck0321, jw0315	predicted carbamate kinase-like protein	0.047	0.06	0.075	0.113	0.137	0.0655453	0.0659898	0.0655876	0.0799991	0.0807351
b0324	yahj, eck0322, jw0316	predicted deaminase with metallo-dependent hydrolase domain	0.069	0.086	0.173	0.236	0.292	0.0954098	0.0944405	0.150925	0.167207	0.171514	1	0.98984	1.58186	1.75251	1.79765
b0325	yahk, eck0323, jw0317	predicted oxidoreductase, zn-dependent and nad(p)-binding	0.909	0.572	1.026	1.257	1.772	1.2657	0.631175	0.895958	0.889878	1.04022	1	0.498676	0.707874	0.70307	0.821854	5240	3730.5	3175	2546.5	2218.5	7218.62	4104.16	2593.84	1748.31	1311.77	1	0.568552	0.359326	0.242194	0.18172											5703.25	6502.41	2895.05	1964.66	1261.05
b0326	yahl, eck0324, jw0318	predicted protein	0.008	0.01	0.015	0.022	0.032	0.0106145	0.0112816	0.0131719	0.0153376	0.0186552
b0327	yahm, eck0325, jw5044	predicted protein	0.023	0.03	0.049	0.081	0.115	0.0323832	0.0326233	0.0430802	0.057137	0.0678174
b0328	yahn, eck0326, jw0320	neutral amino-acid efflux system	0.347	0.642	0.472	0.723	1.075	0.483858	0.707954	0.412444	0.511852	0.631165	1	1.46315	0.852407	1.05786	1.30444
b0329	yaho, eck0327, jw0321	predicted protein	1.979	1.23	1.468	2.027	4.147	2.75515	1.35581	1.28206	1.43452	2.43497	1	0.492099	0.465331	0.520667	0.883789	14958.5	8314	12455.5	12267	3939	20606.8	9146.76	10175.6	8421.94	2329.08	1	0.443871	0.493798	0.408697	0.113025											7479.39	6746.37	7936.94	5870.93	956.513
b0330	prpr, eck0328, jw0322, yahp	dna-binding transcriptional activator	0.083	0.175	0.13	0.149	0.139	0.11508	0.192568	0.113336	0.105261	0.0818115	1	1.67334	0.984842	0.914678
b0331	prpb, eck0329, jw0323, yahq	2-methylisocitrate lyase (ec:4,1,3,30)	0.498	1.699	0.302	0.35	0.42	0.69393	1.87389	0.263709	0.247504	0.246511	1	2.70041	0.380022	0.356669	0.355239	407.5					561.372																				808.975
b0333	prpc, eck0330, jw0324, yahs, yzzd	2-methylcitrate synthase (ec:2,3,3,1)	0.265	0.668	0.106	0.091	0.101	0.369018	0.736898	0.0927545	0.0643547	0.0595609	1	1.99692	0.251355			298					410.525																				1112.48
b0334	prpd, acnc, eck0331, jw0325, yaht	2-methylcitrate dehydratase (ec:4,2,1,79)	0.335	0.71	0.113	0.058	0.06	0.466108	0.783018	0.0987889	0.041204	0.0355234	1	1.67991	0.211944			560.5					772.145																				1656.58
b0335	prpe, eck0332, jw0326, yahu	predicted propionyl-coa synthetase with atpase domain	0.189	0.309	0.124	0.157	0.216	0.262604	0.341223	0.107845	0.11127	0.126668	1	1.29938	0.410673	0.423717	0.482353
b0336	codb, eck0333, jw0327	cytosine transporter	0.178	0.557	1.434	2.519	3.897	0.247612	0.614492	1.25188	1.78247	2.28821	1	2.48168	5.05581	7.19866	9.24114
b0337	coda, eck0334, jw0328	cytosine deaminase (ec:3,5,4,1)	0.206	0.817	1.632	2.88	4.199	0.287221	0.901007	1.42476	2.03839	2.46583	1	3.13699	4.9605	7.09696	8.58515	470.5	978.5	1933.5	3078.5	2820	648.161	1076.51	1579.59	2113.55	1667.43	1	1.66087	2.43703	3.26085	2.57256											2256.66	1194.79	1108.67	1036.87	676.214
b0338	cynr, eck0335, jw5894	dna-binding transcriptional dual regulator	0.044	0.052	0.108	0.164	0.245	0.0617079	0.0574017	0.0946727	0.116385	0.143891	1		1.53421	1.88607	2.33181
b0339	cynt, eck0336, jw0330	carbonic anhydrase (ec:4,2,1,1)	0.04	0.027	0.042	0.059	0.084	0.0563107	0.0301727	0.0370458	0.0421062	0.0491623
b0340	cyns, cnt, eck0337, jw0331	cyanate aminohydrolase (ec:4,2,1,104)	0.246	0.309	0.333	0.58	0.925	0.342422	0.340973	0.290604	0.410506	0.543261	1	0.995768	0.848671	1.19883	1.58652
b0341	cynx, eck0338, jw0332	predicted cyanate transporter	0.037	0.034	0.044	0.056	0.068	0.0510035	0.0375319	0.0386923	0.0396973	0.0398293
b0346	mhpr, eck0343, jw0337	dna-binding transcriptional activator, 3hpp-binding	0.383	1.154	0.548	0.469	0.322	0.532914	1.2724	0.478854	0.331716	0.189103	1	2.38764	0.898559	0.622457	0.354847	35	57	45	24	15	48.216	62.7094	36.7631	16.4773	8.86931	1	1.30059	0.762467	0.341739	0.18395											90.4762	49.2842	76.773	49.6728	46.902
b0347	mhpa, eck0344, jw0338	3-(3-hydroxyphenyl)propionate hydroxylase (ec:1,14,13,-)	0.023	0.026	0.032	0.045	0.048	0.0321736	0.0289437	0.0279902	0.0321819	0.0279882
b0348	mhpb, eck0345, jw0339	2,3-dihydroxyphenylpropionate 1,2-dioxygenase (ec:1,13,11,-)	0.034	0.029	0.038	0.051	0.06	0.047525	0.0323804	0.0329296	0.0357907	0.0355234
b0349	mhpc, eck0346, jw0340	2-hydroxy-6-ketonona-2,4-dienedioic acid hydrolase (ec:3,7,1,-)	0.058	0.1	0.119	0.173	0.21	0.0811072	0.110631	0.103728	0.122403	0.123073	1	1.364	1.2789	1.50915	1.5174
b0350	mhpd, eck0347, jw0341, mhps	2-keto-4-pentenoate hydratase (ec:4,2,1,80)	0.047	0.051	0.067	0.127	0.131	0.0655768	0.0566657	0.0587218	0.0902211	0.0767844	1			1.37581
b0351	mhpf, eck0348, jw0342	acetaldehyde-coa dehydrogenase ii, nad-binding (ec:1,2,1,10)	0.067	0.141	0.125	0.209	0.301	0.0932212	0.155279	0.108939	0.147963	0.176896	1	1.6657	1.16861	1.58722	1.89759
b0352	mhpe, eck0349, jw0343	4-hyroxy-2-oxovalerate/4-hydroxy-2-oxopentanoic acid aldolase, class	0.062	0.054	0.069	0.086	0.105	0.0861761	0.0598523	0.0606481	0.0610526	0.0617139
b0353	mhpt, eck0350, jw5046, yaik	predicted 3-hydroxyphenylpropionic transporter	0.198	0.325	0.336	0.512	0.687	0.275766	0.35815	0.293625	0.362391	0.403675	1	1.29874	1.06476	1.31413	1.46383
b0354	yail, eck0351, jw0345	nucleoprotein/polynucleotide-associated enzyme	0.263	0.299	0.516	0.759	1.175	0.36596	0.329199	0.450313	0.536816	0.690016	1	0.899547	1.2305	1.46687	1.88549	166	202	277	352	396	228.682	222.233	226.297	241.667	234.15	1	0.971802	0.989573	1.05678	1.02391											624.881	675.073	502.533	450.185	339.34
b0355	frmb, eck0352, jw0346, yaim	predicted esterase	0.051	0.097	0.232	0.323	0.598	0.0707329	0.106951	0.202517	0.228864	0.350928	1	1.51204	2.86312	3.23561	4.96131
b0356	frma, adhc, eck0353, jw0347	alcohol dehydrogenase class iii/glutathione-dependent formaldehyde	0.142	0.156	0.351	0.521	0.749	0.197657	0.171712	0.306246	0.3684	0.43992	1	0.868737	1.54938	1.86383	2.22567	488	621.5	660	678	751	672.269	683.752	539.192	465.483	444.057	1	1.01708	0.802048	0.692406	0.660535											3401.19	3981.97	1760.65	1263.53	1009.4
b0357	frmr, eck0354, jw0348, yain	regulator protein that represses frmrab operon	0.246	0.338	0.647	0.957	1.572	0.342993	0.372868	0.565295	0.677263	0.923254	1	1.0871	1.64813	1.97457	2.69176	127	158	223.5	228	305.5	174.955	173.826	182.59	156.534	180.638	1	0.993546	1.04364	0.89471	1.03248											510.084	466.186	323	231.127	195.654
b0358	yaio, eck0355, jw0349	predicted protein	0.068	0.081	0.095	0.119	0.14	0.0940011	0.089289	0.0828757	0.0839056	0.0821668	1	0.949872	0.881645
b0363	yaip, eck0360, jw0355	predicted glucosyltransferase	0.133	0.275	0.262	0.393	0.422	0.185183	0.302705	0.228861	0.277881	0.247587	1	1.63463	1.23586	1.50057	1.33699
b0364	yais, eck0361, jw0356	conserved protein	0.009	0.015	0.021	0.032	0.044	0.0127734	0.0164331	0.018383	0.0225553	0.0258352
b0365	taua, eck0362, jw0357, ssia, yair	taurine transporter subunit	0.033	0.051	0.071	0.117	0.157	0.0454876	0.0566657	0.0620147	0.0827057	0.092221
b0366	taub, eck0363, jw0358, ssib, yaiq	taurine transporter subunit	0.036	0.074	0.093	0.124	0.175	0.0501049	0.0811939	0.0815008	0.0878122	0.102986
b0367	tauc, eck0364, jw0359, ssic, yaij	taurine transporter subunit	0.035	0.054	0.063	0.085	0.108	0.0493241	0.0593666	0.0551571	0.0604482	0.0635116
b0368	taud, eck0365, jw0360, ssid, yaig	taurine dioxygenase, 2-oxoglutarate-dependent (ec:1,14,11,17)	0.057	0.086	0.104	0.146	0.204	0.0789493	0.0951764	0.0905565	0.103457	0.119843	1	1.20554	1.14702	1.31042	1.51798
b0369	hemb, eck0366, jw0361, ncf	porphobilinogen synthase (ec:4,2,1,24)	0.277	0.488	1.077	1.663	2.782	0.385688	0.537714	0.940141	1.17678	1.63336	1	1.39417	2.43757	3.05112	4.23492	917	1407	1543	1245	2658.5	1263.26	1547.93	1260.57	854.758	1571.94	1	1.22535	0.997868	0.67663	1.24435											3275.34	2878.73	1340.83	726.353	962.397
b0375	yaiv, eck0370, jw0366	predicted dna-binding transcriptional regulator	0.007	0.009	0.016	0.021	0.029	0.00929487	0.0098098	0.0142668	0.0150399	0.0168682
b0376	amph, eck0371, jw5052, yaih	beta-lactamase/d-alanine carboxypeptidase (ec:3,5,2,6 3,4,17,8)	1.376	1.095	0.981	1.43	1.527	1.91571	1.2074	0.85617	1.01228	0.896697	1	0.630264	0.446922	0.528412	0.468077
b0377	sbma, eck0372, jw0368	predicted transporter	0.093	0.125	0.175	0.252	0.323	0.129203	0.13811	0.153123	0.178638	0.189458	1	1.06893	1.18513	1.38261	1.46636
b0378	yaiw, eck0373, jw0369	predicted dna-binding transcriptional regulator	0.08	0.11	0.226	0.288	0.357	0.111632	0.121427	0.197306	0.203602	0.209911	1	1.08774	1.76747	1.82387	1.88039
b0379	yaiy, eck0374, jw0370	predicted inner membrane protein	0.046	0.119	0.088	0.093	0.196	0.0636275	0.131729	0.0768331	0.0661592	0.114827	1	2.07032			1.80467
b0380	yaiz, eck0375, jw5053	predicted inner membrane protein	0.885	1.722	1.038	1.475	2.355	1.2323	1.89916	0.90666	1.04356	1.38254	1	1.54115	0.735746	0.84684	1.12192
b0381	ddla, eck0376, jw0372	d-alanine-d-alanine ligase a (ec:6,3,2,4)	0.085	0.168	0.296	0.424	0.668	0.117898	0.185452	0.258498	0.299832	0.392189	1	1.57298	2.19255	2.54314	3.32651	373	17	32	1368.5	64	513.845	18.7028	26.1426	939.548	37.8424	1	0.0363978	0.0508765	1.82847	0.0736456											4358.38	100.85	101.133	3133.58	96.4901
b0382	irap, eck0377, jw0373, yaib	predicted protein	0.313	0.393	0.757	0.917	1.192	0.435343	0.432963	0.661062	0.64869	0.699704	1	0.994533	1.51849	1.49007	1.60725	1663.5	1828	2190	2056		2291.64	2011.1	1789.14	1411.55		1	0.877582	0.780724	0.615958												5263.98	4644.97	2706.46	2176.01
b0383	phoa, eck0378, jw0374, psia	bacterial alkaline phosphatase (ec:3,1,3,1)	0.071	0.117	0.18	0.255	0.315	0.0989792	0.129279	0.157511	0.180442	0.185152	1	1.30612	1.59135	1.82303	1.87062
b0384	psif, eck0379, jw5054	conserved protein	0.25	0.29	0.401	0.537	0.611	0.347519	0.319882	0.350149	0.380129	0.358819	1	0.920473	1.00757	1.09384	1.03252	199.5					274.831																				790.837
b0385	adra, eck0380, jw0376, yaic	predicted diguanylate cyclase	0.06	0.056	0.079	0.105	0.151	0.0839255	0.0613241	0.0688806	0.0745858	0.0886256
b0386	proc, eck0381, jw0377, pro, pro2	pyrroline-5-carboxylate reductase, nad(p)-binding (ec:1,5,1,2)	0.295	0.199	0.63	0.866	1.098	0.410847	0.219061	0.550197	0.612899	0.644804	1	0.533193	1.33918	1.49179	1.56945	901.5	881.5	874.5	928	1029.5	1241.91	969.795	714.429	637.121	608.73	1	0.780892	0.575268	0.513019	0.490158	0.0240086	0.04557	0.066836	0.08568	0.102346	1	1.89807	2.78384	3.56872	4.26287	3022.79	4427.05	1298.5	1039.52	944.055	0.969825	2.3573
b0387	yaii, eck0382, jw0378	conserved protein	0.058	0.127	0.199	0.291	0.449	0.080447	0.139825	0.173432	0.205704	0.263735	1	1.7381	2.15586	2.55702	3.27836
b0388	arol, eck0383, jw0379	shikimate kinase ii (ec:2,7,1,71)	0.385	1.119	0.952	1.274	1.655	0.535701	1.23438	0.831473	0.901914	0.97205	1	2.30423	1.55212	1.68361	1.81454	183	276.5	399	398.5	403	252.101	304.195	325.966	273.591	238.289	1	1.20664	1.293	1.08525	0.945212	0.0460924	0.0864864	0.125197	0.158352	0.187341	1	1.87637	2.71621	3.43553	4.06447	470.599	246.436	392.034	303.345	245.14	9.17214	14.263
b0389	yaia, eck0384, jw0380	predicted protein	0.357	0.866	0.785	1.012	1.542	0.497801	0.954855	0.68576	0.716356	0.905309	1	1.91814	1.37758	1.43904	1.81862	958.5				1150	1320.43				679.98	1				0.514969											2652.52				751.103
b0390	arom, eck0385, jw0381	conserved protein	0.53	0.327	0.388	0.453	0.73	0.737347	0.3606	0.338624	0.320889	0.428434	1	0.489051	0.459246	0.435195	0.581048	318.5	306		239		438.765	336.65		164.086		1	0.767267		0.373972												595.06	933.583		511.348
b0391	yaie, eck0386, jw0382	conserved protein	0.281	0.586	0.946	1.162	1.185	0.391776	0.64663	0.826262	0.822519	0.695753	1	1.65051	2.10902	2.09946	1.7759	942.5					1298.39																				3314.11
b0392	ykia, eck0387, jw0383	pseudogene	0.088	0.12	0.187	0.218	0.252	0.122906	0.132465	0.163002	0.154278	0.148197	1	1.07778	1.32623	1.25525	1.20578
b0393	rdgc, eck0388, jw0384, yaid	dna-binding protein, non-specific	0.119	0.058	0.359	0.496	0.737	0.165335	0.0637821	0.313655	0.35096	0.43274	1		1.89709	2.12272	2.61735	286	358.5	461	462.5	631.5	393.993	394.409	376.617	317.531	373.398	1	1.00105	0.955897	0.805929	0.947726											2383		1200.74	904.748	862.869
b0394	mak, eck0389, jw0385, yajf	manno(fructo)kinase (ec:2,7,1,4)	0.273	0.276	0.466	0.611	0.746	0.379453	0.303934	0.406953	0.432159	0.438122	1	0.80098	1.07247	1.1389	1.15461	339.5	330	346.5	308	254.5	467.695	363.054	283.076	211.458	150.483	1	0.776263	0.605257	0.452129	0.321754											1232.55	1194.51	695.599	489.306	343.472
b0396	araj, eck0390, jw0386	predicted transporter	0.045	0.066	0.089	0.145	0.219	0.0621271	0.0723629	0.0776563	0.102852	0.128455	1			1.65551	2.06761
b0397	sbcc, eck0391, jw0387, rmua	exonuclease, dsdna, atp-dependent	0.06	0.146	0.166	0.225	0.364	0.0831762	0.161409	0.145162	0.159087	0.213862	1	1.94057	1.74524	1.91265	2.57119
b0398	sbcd, eck0392, jw0388, yaja	exonuclease, dsdna, atp-dependent	0.074	0.061	0.18	0.261	0.354	0.103475	0.0669686	0.157511	0.184656	0.208113	1		1.52221	1.78454	2.01124
b0399	phob, eck0393, jw0389, phorc	dna-binding response regulator in two-component regulatory system	0.098	0.108	0.236	0.314	0.314	0.136609	0.118976	0.20581	0.222242	0.184431	1	0.870922	1.50656	1.62684	1.35006	73					100.565																				736.149
b0400	phor, eck0394, jw0390, nmpb, phor1, r1pho	sensory histidine kinase in two-component regulatory system with	0.041	0.067	0.103	0.13	0.167	0.0575098	0.0735919	0.0900049	0.0920255	0.0983138	1	1.27964	1.56504	1.60017
b0401	brnq, eck0395, hrba, jw0391	predicted branched chain amino acid transporter (liv-ii)	0.12	0.17	0.273	0.345	0.588	0.166773	0.187166	0.23874	0.244202	0.345191	1	1.12228	1.43152	1.46427	2.06982
b0402	proy, eck0396, jw5055, yajm	predicted cryptic proline transporter	0.069	0.137	0.196	0.29	0.533	0.09616	0.150621	0.170962	0.205406	0.313252	1	1.56635	1.77789	2.13609	3.25761
b0403	malz, eck0397, jw0393	maltodextrin glucosidase (ec:3,2,1,20)	0.093	0.152	0.191	0.243	0.325	0.129052	0.167547	0.166846	0.171718	0.19089	1	1.29828	1.29286	1.33061	1.47917
b0404	acph, acpd, eck0398, jw0394, yajb	conserved protein	0.03	0.043	0.109	0.142	0.199	0.0417986	0.0475919	0.0952243	0.100145	0.11698
b0405	quea, eck0399, jw0395	s-adenosylmethionine:trna ribosyltransferase-isomerase (ec:5,-,-,-)	0.062	0.057	0.23	0.348	0.863	0.0868355	0.063289	0.200599	0.246006	0.506661	1		2.31011	2.83301	5.83472
b0406	tgt, eck0400, jw0396, vacc	trna-guanine transglycosylase (ec:2,4,2,29)	0.233	0.446	0.807	1.317	2.366	0.324941	0.492087	0.704694	0.931984	1.389	1	1.51439	2.16868	2.86817	4.27462	60	91	144	212	263	82.656	100.115	117.642	145.549	155.509	1	1.21122	1.42327	1.7609	1.8814											254.372	203.45	166.94	156.171	111.957
b0407	yajc, eck0401, jw0397	secyeg protein translocase auxillary subunit	0.846	0.907	2.3	3.323	4.491	1.17812	0.999621	2.00844	2.35146	2.63699	1	0.84849	1.70478	1.99595	2.23831	2154	3359	4298.5	4462.5	3329.5	2967.35	3695.45	3511.69	3063.74	1968.69	1	1.24537	1.18344	1.03248	0.663451											2518.72	3696.85	1748.47	1302.91	746.567
b0408	secd, eck0402, jw0398	secyeg protein translocase auxillary subunit	0.193	0.348	0.662	0.934	1.633	0.26869	0.383414	0.578187	0.661321	0.959132	1	1.42697	2.15187	2.46128	3.56966	126.5	162	227.5	243	257	174.266	178.227	185.858	166.832	151.961	1	1.02273	1.06652	0.957341	0.872003											648.577	464.841	321.449	252.271	158.436
b0409	secf, eck0403, jw0399	secyeg protein translocase auxillary subunit	0.226	0.55	0.597	0.778	1.138	0.315316	0.605904	0.521383	0.550953	0.668486	1	1.92158	1.65353	1.74731	2.12005	88	34	247	46	43	121.229	37.4056	201.788	31.5814	25.4253	1	0.308554	1.66453	0.260511	0.20973											384.468	61.7352	387.025	57.3214	38.0342
b0410	yajd, eck0404, jw0400	conserved protein	0.173	0.174	0.48	0.612	0.644	0.241165	0.192075	0.418758	0.433359	0.378195	1	0.796447	1.7364	1.79694	1.5682	384	541	532.5	569	478	528.998	595.189	435.03	390.649	282.635	1	1.12512	0.822365	0.738469	0.534284											2193.51	3098.73	1038.86	901.443	747.326
b0411	tsx, eck0405, jw0401, nupa, t6rec	nucleoside channel, receptor of phage t6 and colicin k	0.69	0.87	1.717	2.168	3.351	0.96058	0.959638	1.49939	1.53436	1.96778	1	0.999019	1.56092	1.59733	2.04854	201.5	222	290	329	273	277.586	244.236	236.918	225.876	161.421	1	0.879858	0.853492	0.813714	0.581518											288.978	254.509	158.009	147.211	82.0321
b0412	yaji, eck0406, jw5056	predicted lipoprotein	0.038	0.077	0.134	0.184	0.283	0.0528916	0.0851237	0.116629	0.129918	0.166131
b0413	nrdr, eck0407, jw0403, ribx, ybad	conserved protein	0.386	0.472	0.896	1.218	1.606	0.538132	0.520295	0.78235	0.861909	0.942985	1	0.966853	1.45383	1.60167	1.75233	185.5	228.5	257	170	332	255.545	251.388	209.958	116.714	196.307	1	0.983732	0.82161	0.456726	0.768192											474.874	483.164	268.368	135.413	208.176
b0414	ribd, eck0408, jw0404, ribg, ybae	fused diaminohydroxyphosphoribosylaminopyrimidine deaminase and	0.278	0.41	0.751	1.05	1.524	0.387308	0.451854	0.655571	0.743124	0.8949	1	1.16665	1.69264	1.91869	2.31056	37.5	38	59	47	63.5	51.66	41.8062	48.2005	32.268	37.5467	1	0.809258	0.933033	0.624622	0.726805											133.382	92.5215	73.5244	43.422	41.9564
b0415	ribe, eck0409, jw0405, ribh, ybaf	riboflavin synthase beta chain (ec:2,5,1,9)	0.419	0.588	1.626	2.24	2.991	0.583977	0.648587	1.41954	1.58519	1.75607	1	1.11064	2.43081	2.71446	3.00709	3562	5480.5	8965	10125	11177	4907.01	6029.45	7324.02	6951.35	6608.82	1	1.22874	1.49256	1.41662	1.34681											8402.74	9296.28	5159.44	4385.2	3763.41
b0416	nusb, eck0410, gronb, jw0406, ssad, ssyb	transcription antitermination protein	0.261	0.413	1.081	1.509	2.169	0.363411	0.455041	0.943434	1.06792	1.27346	1	1.25214	2.59605	2.9386	3.50419	1096.5	1472	2241	2543	3051.5	1510.54	1619.44	1830.8	1745.9	1804.31	1	1.0721	1.21202	1.15582	1.19448											4156.55	3558.89	1940.57	1634.86	1416.86
b0417	thil, eck0411, jw0407	thiamin-monophosphate kinase (ec:2,7,4,16)	0.126	0.146	0.367	0.479	0.632	0.17583	0.161166	0.320792	0.339231	0.371381	1	0.916604	1.82445	1.92932	2.11216	139.5	160	204	233.5	234	192.175	176.026	166.659	160.31	138.361	1	0.915968	0.867226	0.834187	0.719975											1092.96	1092.2	519.524	472.568	372.558
b0418	pgpa, eck0412, jw0408, yajn	phosphatidylglycerophosphatase a (ec:3,1,3,27)	0.168	0.296	0.376	0.479	0.666	0.234298	0.326255	0.328201	0.338934	0.391113	1	1.39248	1.40079	1.44659	1.6693
b0419	yajo, eck0413, jw0409	2-carboxybenzaldehyde reductase, function unknown	0.752	1.118	0.921	1.202	1.472	1.04687	1.23242	0.804578	0.850785	0.864403	1	1.17724	0.768552	0.81269	0.825699	825	748	733	631.5	588.5	1136.52	822.923	598.83	433.558	347.973	1	0.724073	0.526898	0.381479	0.306174											1085.63	667.729	744.278	509.598	402.558
b0420	dxs, eck0414, jw0410, yajp	1-deoxyxylulose-5-phosphate synthase, thiamine-requiring,	0.218	0.466	0.553	0.706	0.913	0.303352	0.514164	0.482419	0.499825	0.536081	1	1.69494	1.59029	1.64767	1.76719	80	98	122.5	114.5	117	110.208	107.816	100.077	78.6103	69.1806	1	0.978297	0.908077	0.713291	0.627728											363.301	209.692	207.449	157.276	129.049
b0421	ispa, eck0415, jw0411	geranyltranstransferase (ec:2,5,1,10 2,5,1,1)	0.464	0.571	0.986	1.418	2.032	0.646255	0.629947	0.860838	1.00326	1.19345	1	0.974765	1.33204	1.55242	1.84671	133.5	170	215.5	210.5	225	183.91	187.028	176.054	144.519	133.04	1	1.01696	0.957287	0.785818	0.723397											284.577	296.895	204.515	144.05	111.475
b0422	xseb, eck0416, jw0412, yaje	exonuclease vii small subunit (ec:3,1,11,6)	0.602	0.592	1.056	1.412	2.132	0.838184	0.652392	0.921618	0.999199	1.25193	1	0.77834	1.09954	1.1921	1.49362	357.5	423	466	427.5	532.5	492.492	465.369	380.702	293.501	314.86	1	0.944928	0.773012	0.595952	0.639321											587.57	713.328	413.08	293.737	251.5
b0423	thii, eck0417, jw0413, nuva, yajj, yajk	sulfurtransferase required for thiamine and 4-thiouridine	0.091	0.13	0.313	0.475	0.941	0.126804	0.143504	0.273044	0.336227	0.552583	1	1.1317	2.15327	2.65154	4.35776
b0424	yajl, eck0418, jw5057, thij	conserved protein	0.114	0.206	0.301	0.414	0.669	0.158947	0.227642	0.263165	0.293219	0.392555	1	1.43218	1.65568	1.84475	2.46972	296.5	378.5	509	603.5	787.5	408.458	416.412	415.831	414.335	465.639	1	1.01947	1.01805	1.01439	1.13999											2569.77	1829.24	1580.11	1413.06	1186.17
b0425	pane, apba, eck0419, jw0415	2-dehydropantoate reductase, nadph-specific (ec:1,1,1,169)	0.139	0.232	0.371	0.585	0.778	0.19412	0.2561	0.323534	0.414115	0.456777	1	1.31929	1.66667	2.13329	2.35307
b0426	yajq, eck0420, jw5058	predicted nucleotide binding protein	0.314	0.278	0.96	1.239	1.876	0.437382	0.306385	0.838059	0.876949	1.10158	1	0.700497	1.91608	2.00499	2.51858	3917	4227	4731	5365.5	6977	5396.06	4650.39	3865.02	3683.7	4125.41	1	0.861813	0.716268	0.682665	0.764523											12337.2	15178.3	4611.88	4200.58	3744.99
b0427	yajr, eck0421, jw5059	predicted transporter	0.076	0.091	0.151	0.267	0.514	0.105336	0.100085	0.131719	0.18886	0.301766	1	0.950148	1.25046	1.79293	2.86479
b0428	cyoe, eck0422, jw0418	protoheme ix farnesyltransferase (ec:2,5,1,-)	1.081	1.776	2.201	2.898	4.785	1.50543	1.95779	1.92144	2.05102	2.80958	1	1.30049	1.27634	1.36242	1.8663
b0429	cyod, eck0423, jw0419	cytochrome o ubiquinol oxidase subunit iv (ec:1,10,3,-)	1.093	2.76	3.224	4.942	7.052	1.52162	3.04376	2.81521	3.49758	4.14081	1	2.00034	1.85014	2.29859	2.72132																8.47853	15.3505	20.3821	23.2368	26.5229	1	1.81052	2.40396	2.74066	3.12824
b0430	cyoc, eck0424, jw0420	cytochrome o ubiquinol oxidase subunit iii (ec:1,10,3,-)	0.768	2.057	2.614	4.125	6.732	1.06948	2.26859	2.28202	2.91926	3.95314	1	2.1212	2.13376	2.72959	3.69631																8.47853	15.3505	20.3821	23.2368	26.5229	1	1.81052	2.40396	2.74066	3.12824
b0431	cyob, eck0425, jw0421	cytochrome o ubiquinol oxidase subunit i (ec:1,10,3,-)	1.005	2.782	3.336	5.248	8.203	1.39877	3.06755	2.91263	3.7144	4.81647	1	2.19303	2.08227	2.65547	3.44335	550.5	1063	1545	2216	3239	758.369	1169.47	1262.2	1521.4	1915.18	1	1.54209	1.66436	2.00615	2.52539	8.47853	15.3505	20.3821	23.2368	26.5229	1	1.81052	2.40396	2.74066	3.12824	542.167	381.24	433.354	409.595	397.631	560.861	658.488
b0432	cyoa, eck0426, jw0422	cytochrome o ubiquinol oxidase subunit ii (ec:1,10,3,-)	1.374	2.816	4.075	6.621	10.649	1.91283	3.10533	3.55778	4.68548	6.25284	1	1.62343	1.85996	2.44951	3.2689	629	1152	1867.5	2074	3151.5	866.51	1267.39	1525.67	1423.91	1863.44	1	1.46264	1.7607	1.64327	2.15051	8.47853	15.3505	20.3821	23.2368	26.5229	1	1.81052	2.40396	2.74066	3.12824	453	408.133	428.826	303.898	298.015	490.865	607.615
b0433	ampg, eck0427, jw0423	muropeptide transporter	0.062	0.069	0.192	0.267	0.418	0.0857848	0.0762927	0.16739	0.18886	0.245435	1	0.88935	1.95127	2.20155	2.86105
b0434	yajg, eck0428, jw0424	predicted lipoprotein	0.515	0.212	1.695	2.291	2.383	0.717496	0.234022	1.48019	1.62127	1.39941	1	0.326165	2.06299	2.25963	1.95041	804.5	1154.5	1445.5	1561.5	1654.5	1108.28	1270.14	1180.91	1072.05	978.285	1	1.14605	1.06554	0.967313	0.882706											1544.65	5427.43	797.813	661.241	699.071
b0435	bola, eck0429, jw5060	regulator of penicillin binding proteins and beta lactamase	0.914	1.21	1.084	1.287	1.717	1.27329	1.33471	0.946455	0.910936	1.00793	1	1.04824	0.743316	0.71542	0.791595	391.5	650	1636	1078.5	2351	539.33	715.107	1336.54	740.447	1390.12	1	1.32592	2.47815	1.3729	2.57749											423.573	535.775	1412.16	812.843	1379.18
b0436	tig, eck0430, jw0426	peptidyl-prolyl cis/trans isomerase (trigger factor)	1.404	1.978	4.569	6.311	9.085	1.95567	2.18151	3.9897	4.46655	5.33462	1	1.11548	2.04006	2.28389	2.72776	4616	6282	9717	11368.5	15336	6359	6911.23	7938.37	7805.08	9067.98	1	1.08684	1.24837	1.22741	1.42601											3251.56	3168.1	1989.72	1747.45	1699.84
b0437	clpp, eck0431, jw0427, lopp, wsea	proteolytic subunit of clpa-clpp and clpx-clpp atp-dependent serine	0.445	0.806	1.331	1.884	2.456	0.620256	0.888497	1.16214	1.33317	1.44211	1	1.43247	1.87365	2.14939	2.32502	2557.5	3594	4817	4653	6505.5	3523.21	3953.99	3935.28	3194.53	3846.62	1	1.12227	1.11696	0.90671	1.09179											5680.25	4450.2	3386.23	2396.19	2667.35
b0438	clpx, eck0432, jw0428, lopc	atpase and specificity subunit of clpx-clpp atp-dependent serine	0.583	0.994	1.232	1.87	2.809	0.811558	1.09652	1.07598	1.32354	1.64915	1	1.35113	1.32581	1.63087	2.03208	580	872.5	1497	1776	2314	799.008	959.893	1222.99	1219.32	1368.24	1	1.20136	1.53063	1.52604	1.71242											984.535	875.4	1136.63	921.252	829.664
b0439	lon, capr, deg, dir, eck0433, jw0429, lopa, muc	dna-binding atp-dependent protease la (ec:3,4,21,53)	0.459	0.938	1.571	2.3	3.025	0.639628	1.0347	1.37152	1.62789	1.77617	1	1.61766	2.14425	2.54505	2.77688	1019	1221	1772.5	2089.5	2319	1403.77	1343.3	1448.06	1434.55	1371.2	1	0.956921	1.03155	1.02193	0.976792											2194.67	1298.25	1055.8	881.236	771.995
b0440	hupb, dpea, eck0434, hopd, jw0430	hu, dna-binding transcriptional regulator, beta subunit	3.64	4.109	4.376	4.843	5.951	5.06872	4.53081	3.82066	3.4278	3.49457	1	0.893877	0.753773	0.676266	0.689439	18124.5	22004.5	24351	20483.5	18369.5	24968.3	24208.6	19893.7	14063	10861.7	1	0.969572	0.796759	0.563234	0.435018											4925.96	5343.1	5206.88	4102.63	3108.15
b0441	ppid, eck0435, jw0431, ybau	peptidyl-prolyl cis-trans isomerase (rotamase d) (ec:5,2,1,8)	0.244	0.391	0.753	1.001	1.458	0.339484	0.431006	0.657218	0.708236	0.856147	1	1.26959	1.93593	2.08622	2.52191	612.5	820	1051.5	1075	1123	843.78	902.135	859.031	738.044	664.016	1	1.06916	1.01807	0.874688	0.786954											2485.48	2093.09	1307.07	1042.09	775.586
b0442	ybav, eck0436, jw0432	conserved protein	0.134	0.219	0.212	0.342	0.422	0.186023	0.241874	0.185229	0.241793	0.247587	1	1.30024	0.995731	1.2998	1.33095
b0443	tesc, eck0437, jw0433, ybaw	thioesterase iii	0.25	0.369	0.296	0.354	0.517	0.34758	0.40647	0.258226	0.250517	0.303564	1	1.16943	0.742925	0.720746	0.873363	422.5	381.5	245.5	110.5	60	582.036	419.713	200.563	75.8641	35.4772	1	0.721111	0.344589	0.130343	0.0609537											1674.54	1032.58	776.696	302.83	116.869
b0444	quec, eck0438, jw0434, ybax	predicted aluminum resistance protein	0.11	0.163	0.317	0.413	0.59	0.153579	0.180057	0.276609	0.292614	0.346622	1	1.17241	1.80109	1.9053	2.25697	222.5	276	411	439.5	548.5	306.516	303.645	335.769	301.74	324.321	1	0.990635	1.09544	0.984419	1.05809											1995.82	1686.38	1213.88	1031.19	935.661
b0445	ybae, eck0439, jw0435	predicted transporter subunit: periplasmic-binding component of abc	0.059	0.135	0.125	0.139	0.091	0.0827273	0.148898	0.109219	0.0986388	0.0534681	1	1.79987	1.32023	1.19234
b0446	cof, eck0440, jw0436	thiamin pyrimidine pyrophosphate hydrolase	0.235	0.288	0.375	0.425	0.458	0.32731	0.317917	0.327378	0.300734	0.269117	1	0.971302	1.00021	0.918805	0.822207
b0447	ybao, eck0441, jw0437	predicted dna-binding transcriptional regulator	0.102	0.18	0.252	0.324	0.403	0.141856	0.198455	0.220357	0.229162	0.236823	1	1.39899	1.55338	1.61545	1.66946
b0448	mdla, eck0442, jw0438, mdl	fused predicted multidrug transporter subunits of abc superfamily:	0.046	0.079	0.109	0.135	0.186	0.0644677	0.0875743	0.0954959	0.0956344	0.109078	1	1.35842	1.4813	1.48345	1.69199
b0449	mdlb, eck0443, jw5061, mdl	fused predicted multidrug transporter subunits of abc superfamily:	0.046	0.102	0.104	0.122	0.172	0.064017	0.112596	0.0905565	0.0860078	0.100833	1	1.75884	1.41457
b0450	glnk, eck0444, jw0440, ybai	nitrogen assimilation regulatory protein for glnl, glne, and amtb	0.019	0.025	0.038	0.076	0.318	0.0262663	0.0279649	0.0329296	0.0541327	0.18695
b0451	amtb, eck0445, jw0441, ybag	ammonium transporter	0.064	0.085	0.11	0.147	0.313	0.0895637	0.0939548	0.0957676	0.104052	0.184076	1	1.04903	1.06927	1.16176	2.05525
b0452	tesb, eck0446, jw0442	acyl-coa thioesterase ii (ec:3,1,2,-)	0.176	0.235	0.381	0.491	0.759	0.245423	0.259536	0.332318	0.347649	0.445657	1	1.05751	1.35406	1.41653	1.81587	173.5	179	196.5	216.5	266	239.014	196.929	160.532	148.639	157.282	1	0.823926	0.671644	0.621884	0.658048											973.884	758.773	483.068	427.554	352.922
b0453	ybay, eck0447, jw0443	predicted outer membrane lipoprotein	0.286	0.323	0.958	1.232	1.56	0.397592	0.356428	0.836141	0.872141	0.916074	1	0.896465	2.10301	2.19355	2.30405	1897	1689.5	2724	3096.5	2881	2613.31	1858.73	2225.39	2125.91	1703.5	1	0.711255	0.851562	0.813495	0.651856											6572.83	5214.88	2661.5	2437.58	1859.56
b0454	ybaz, eck0448, jw0444	predicted methyltransferase	0.197	0.352	0.365	0.47	0.499	0.274357	0.387586	0.318866	0.332311	0.293154	1	1.41271	1.16223	1.21124	1.06851
b0455	ffs, eck0449, jwr0009	4,5s srna component of signal recognition particle (srp)	1.183	1.23	1.813	1.427	1.412	1.64686	1.3563	1.58309	1.00957	0.82888	1	0.823564	0.961277	0.613028	0.503308
b0456	ybaa, eck0450, jw0445	conserved protein	0.129	0.135	0.144	0.148	0.164	0.179038	0.148656	0.125404	0.104954	0.0961608	1	0.830304	0.700436	0.586214		328					451.853																				2523.79
b0457	ylab, eck0451, jw5062	conserved inner membrane protein	0.037	0.071	0.105	0.139	0.212	0.0509729	0.0780074	0.0913797	0.0986388	0.124515
b0458	ylac, eck0452, jw5063	predicted inner membrane protein	0.172	0.175	0.504	0.636	0.735	0.239516	0.193054	0.439882	0.449906	0.431308	1	0.806016	1.83655	1.8784	1.80075
b0459	maa, eck0453, jw0448, ylad	maltose o-acetyltransferase (ec:2,3,1,79)	0.112	0.073	0.274	0.348	0.306	0.155949	0.0802152	0.239291	0.246601	0.17977	1	0.514367	1.53442	1.58129	1.15275
b0460	hha, eck0454, jw0449	modulator of gene expression, with h-ns	0.3	0.216	1.01	1.495	2.393	0.417923	0.23807	0.882103	1.05829	1.40533	1	0.56965	2.11068	2.53227	3.36265
b0461	tomb, eck0455, jw0450, ybaj	predicted protein	0.15	0.136	0.521	0.731	1.075	0.208991	0.149634	0.45498	0.517265	0.631165	1	0.715985	2.17703	2.47506	3.02006
b0462	acrb, acre, eck0456, jw0451	multidrug efflux system protein	0.317	0.674	0.768	0.968	1.429	0.440771	0.743035	0.670941	0.685076	0.839289	1	1.68576	1.5222	1.55427	1.90414	164	235.5	308	352.5	293	225.926	259.089	251.623	242.01	173.247	1	1.14678	1.11374	1.07119	0.76683											512.571	348.69	375.03	353.26	206.421
b0463	acra, eck0457, jw0452, lir, mb, mbl, mtca, sipb	multidrug efflux system	0.528	0.562	1.294	1.9	2.875	0.735338	0.619887	1.12976	1.3449	1.6879	1	0.842995	1.53638	1.82895	2.29541	928	1107.5	1436.5	1461	1434	1278.41	1218.43	1173.56	1003.05	847.906	1	0.953082	0.917982	0.784609	0.663249											1738.54	1965.57	1038.77	745.821	502.343
b0464	acrr, eck0458, jw0453, ybah	dna-binding transcriptional repressor	0.027	0.037	0.141	0.192	0.231	0.037721	0.0409686	0.123486	0.135629	0.135635
b0465	kefa, aefa, eck0459, jw0454, msck, pnuh	fused conserved protein	0.068	0.165	0.189	0.258	0.406	0.0948413	0.181529	0.16492	0.182247	0.238621	1	1.91403	1.7389	1.9216	2.516
b0466	ybam, eck0460, jw0455	predicted protein	0.122	0.174	0.298	0.372	0.518	0.169877	0.192075	0.260556	0.262995	0.304102	1	1.13067	1.53379	1.54815	1.79013
b0467	pric, eck0461, jw0456	primosomal replication protein n''	0.195	0.195	0.344	0.459	0.53	0.272169	0.214645	0.299931	0.324796	0.311099	1	0.788648	1.102	1.19336	1.14304
b0468	yban, eck0462, jw0457	conserved inner membrane protein	0.821	1.069	1.006	1.797	2.452	1.14289	1.1787	0.878126	1.27151	1.43959	1	1.03134	0.768341	1.11255	1.25961
b0469	apt, eck0463, jw0458	adenine phosphoribosyltransferase (ec:2,4,2,7)	0.286	0.174	1	1.534	2.282	0.398135	0.192318	0.872907	1.08596	1.33985	1	0.483047	2.19249	2.72763	3.36531	509.5	708.5	1014	1345.5	1929.5	701.887	779.466	828.395	923.757	1140.89	1	1.11053	1.18024	1.3161	1.62546											1762.94	4053.01	949.007	850.633	851.507
b0470	dnax, dnaz, eck0464, jw0459	dna polymerase iii/dna elongation factor iii, tau and gamma subunits	0.105	0.244	0.338	0.496	0.801	0.146144	0.26861	0.295543	0.351258	0.470416	1	1.83798	2.02227	2.4035	3.21885	30	38	46	44	49	41.328	41.8062	37.58	30.2083	28.9731	1	1.01157	0.909312	0.730941	0.701052											282.789	155.639	127.156	86.0004	61.5903
b0471	ybab, eck0465, jw0460	conserved protein	0.578	0.769	1.589	2.592	3.256	0.805111	0.847536	1.38716	1.8342	1.91181	1	1.05269	1.72294	2.27819	2.37459	1696.5			2968	4209	2337.1			2037.69	2488.73	1			0.871889	1.06488											2902.83			1110.94	1301.77
b0472	recr, eck0466, jw0461	gap repair protein	0.31	0.462	1.07	1.574	2.147	0.432016	0.509256	0.934107	1.11423	1.26054	1	1.17879	2.16221	2.57914	2.91782
b0473	htpg, eck0467, jw0462	molecular chaperone hsp90 family	0.262	0.501	0.756	1.056	1.03	0.36494	0.551939	0.659967	0.747031	0.604975	1	1.51241	1.80843	2.04699	1.65774	1004	1229.5	1629.5	1937	2138	1383.11	1352.65	1331.23	1329.85	1264.17	1	0.977979	0.962492	0.961495	0.914007											3789.96	2450.73	2017.12	1780.18	2089.63
b0474	adk, dnaw, eck0468, jw0463, plsa	adenylate kinase (ec:2,7,4,3)	0.576	0.485	1.975	2.773	5.095	0.802293	0.535256	1.72469	1.96261	2.9915	1	0.667158	2.1497	2.44625	3.72869	2435.5	3988	4441	4971	6720.5	3355.14	4387.45	3628.11	3412.85	3973.75	1	1.30768	1.08136	1.0172	1.18437	0.0101438	0.0217632	0.0360592	0.0516025	0.0661855	1	2.14546	3.55479	5.08708	6.5247	4181.94	8196.93	2103.63	1738.94	1328.34	0.151672	0.248842
b0475	hemh, eck0469, jw0464, popa, visa	ferrochelatase (ec:4,99,1,1)	0.063	0.103	0.208	0.282	0.304	0.0870451	0.113089	0.181385	0.199389	0.178338	1	1.2992	2.0838	2.29064	2.04881
b0476	aes, eck0470, jw0465, ybac	acetyl esterase (ec:3,1,1,-)	0.048	0.082	0.085	0.09	0.083	0.0672248	0.0902752	0.0743633	0.0634525	0.0487963	1	1.34289
b0477	gsk, eck0471, jw0466	inosine/guanosine kinase (ec:2,7,1,73)	0.15	0.152	0.383	0.625	1.05	0.208242	0.167547	0.334236	0.442381	0.616461	1	0.804578	1.60504	2.12436	2.96031
b0478	ybal, eck0472, jw0467, ylaa	predicted transporter with nad(p)-binding rossmann-fold domain	0.186	0.413	0.463	0.592	0.772	0.259245	0.455291	0.40394	0.418626	0.453548	1	1.75622	1.55814	1.61479	1.74949
b0479	fsr, eck0473, jw0468	predicted fosmidomycin efflux system	0.087	0.155	0.215	0.267	0.29	0.120478	0.170976	0.187699	0.18886	0.170082	1	1.41915	1.55795	1.56759	1.41173
b0480	usha, eck0474, jw0469	bifunctional udp-sugar hydrolase/5'-nucleotidase (ec:3,6,1,45)	0.248	0.496	0.708	0.982	1.214	0.345211	0.547281	0.617982	0.694703	0.712977	1	1.58535	1.79016	2.0124	2.06534	451	461	638.5	662.5	684	621.297	507.176	521.627	454.841	404.44	1	0.816317	0.839577	0.732083	0.650961											1799.76	926.719	844.081	654.728	567.256
b0481	ybak, eck0475, jw0470	conserved protein	0.061	0.069	0.247	0.323	0.443	0.0848259	0.0757996	0.215689	0.228557	0.26015	1	0.893591	2.54273	2.69443	3.06687	188.5	332	435	392	794	259.678	365.254	355.376	269.129	469.482	1	1.40657	1.36853	1.0364	1.80794											3061.3	4818.68	1647.63	1177.51	1804.66
b0482	ybap, eck0476, jw0471	conserved protein	0.067	0.091	0.199	0.311	0.437	0.0936116	0.100328	0.173704	0.219842	0.256554	1	1.07175	1.85558	2.34845	2.74063
b0483	ybaq, eck0477, jw0472	predicted dna-binding transcriptional regulator	0.204	0.19	0.349	0.441	0.628	0.284162	0.209001	0.305151	0.312165	0.368507	1	0.735498	1.07386	1.09855	1.29682
b0484	copa, eck0478, jw0473, ybar	copper transporter (ec:3,6,3,4)	0.212	0.427	0.512	0.673	0.987	0.295167	0.470988	0.447291	0.476368	0.579495	1	1.59567	1.51538	1.61389	1.96328	231	328	459.5	472	477	318.225	360.854	375.392	324.053	282.044	1	1.13396	1.17964	1.01831	0.886302											1078.12	766.163	839.256	680.258	486.707
b0485	ybas, eck0479, jw0474	glutaminase	0.205	0.28	0.516	0.783	1.274	0.284761	0.308593	0.450313	0.554255	0.74779	1	1.08369	1.58137	1.94639	2.62602
b0486	ybat, eck0480, jw0475	predicted transporter	0.051	0.117	0.186	0.273	0.441	0.0710334	0.129279	0.16273	0.193073	0.259073	1	1.81997	2.29089	2.71806	3.64721
b0487	cuer, eck0481, jw0476, ybbi	dna-binding transcriptional activator of copper-responsive regulon	0.236	0.225	0.432	0.552	0.65	0.329048	0.248498	0.377316	0.39036	0.381425	1	0.755202	1.14669	1.18633	1.15918
b0488	ybbj, eck0482, jw5065	conserved inner membrane protein	0.123	0.197	0.255	0.323	0.368	0.170731	0.217339	0.222827	0.228864	0.21637	1	1.27299	1.30513	1.34049	1.26731
b0489	qmca, eck0483, jw0478, ybbk	predicted protease, membrane anchored	0.136	0.27	0.386	0.532	0.6	0.189621	0.298047	0.336977	0.376222	0.35236	1	1.5718	1.7771	1.98407	1.85823
b0490	ybbl, eck0484, jw0479	predicted transporter subunit: atp-binding component of abc	0.094	0.106	0.302	0.433	0.64	0.131512	0.116768	0.263709	0.306752	0.375687	1	0.887893	2.00521	2.33251	2.85668
b0491	ybbm, eck0485, jw5066	predicted inner membrane protein	0.094	0.197	0.252	0.341	0.495	0.130912	0.217589	0.220357	0.241188	0.290646	1	1.66211	1.68325	1.84237	2.22017
b0492	ybbn, eck0486, jw5067	predicted thioredoxin domain-containing protein	0.278	0.393	0.776	1.177	1.261	0.387249	0.433456	0.677256	0.832741	0.74061	1	1.11932	1.74889	2.1504	1.91249	1132.5	1444.5	2093	2406	2780	1560.13	1589.19	1709.89	1651.85	1643.78	1	1.01862	1.09599	1.05879	1.05362											4028.76	3666.32	2524.74	1983.63	2219.49
b0493	ybbo, eck0487, jw0482	predicted oxidoreductase with nad(p)-binding rossmann-fold domain	0.181	0.266	0.49	0.701	0.917	0.252589	0.293139	0.427534	0.496216	0.538589	1	1.16054	1.69261	1.96452	2.13228
b0494	tesa, apea, eck0488, jw0483, pldc	multifunctional acyl-coa thioesterase i and protease i and	0.096	0.149	0.323	0.454	0.499	0.133221	0.16411	0.2821	0.321485	0.292799	1	1.23186	2.11754	2.41317	2.19785	149	184	238	230	251	205.262	202.43	194.436	157.907	148.413	1	0.986202	0.947255	0.769294	0.723041											1540.77	1233.5	689.245	491.181	506.877
b0495	ybba, eck0489, jw0484	predicted transporter subunit: atp-binding component of abc	0.312	0.336	0.466	0.734	0.975	0.434655	0.37041	0.406681	0.519376	0.572325	1	0.852193	0.935641	1.19492	1.31673
b0496	ybbp, eck0490, jw0485	predicted inner membrane protein	0.049	0.099	0.119	0.164	0.249	0.0680352	0.109159	0.104	0.116088	0.1464	1	1.60445	1.52862	1.70629	2.15182
b0497	rhsd, eck0491, jw0486	rhsd element protein	0.132	0.105	0.128	0.193	0.265	0.184104	0.115782	0.111409	0.136532	0.155367	1	0.628896	0.605144	0.741602	0.843908
b0498	ybbc, eck0492, jw0487	predicted protein	0.019	0.055	0.109	0.162	0.289	0.0270759	0.0603453	0.0952243	0.114879	0.169727
b0499	ylbh, eck0493, jw0488	pseudogene	0.014	0.014	0.043	0.063	0.078	0.0191304	0.0152114	0.0375974	0.0445061	0.0455669
b0502	ylbg, eck0495, jw5880	pseudogene	0.092	0.111	0.168	0.26	0.291	0.127734	0.122898	0.146265	0.183753	0.171158	1	0.962146	1.14508	1.43857	1.33996
b0503	selu, eck0496, jw0491, sele, ybbb	trna 2-selenouridine synthase, selenophosphate-dependent	0.324	0.311	0.396	0.648	0.876	0.451805	0.342938	0.346033	0.458621	0.514551	1	0.759041	0.76589	1.01509	1.13888
b0504	alls, eck0497, glxa1, jw0492, ybbs	dna-binding transcriptional activator of the alld operon	0.052	0.063	0.074	0.119	0.142	0.0730411	0.0691764	0.0647644	0.0845101	0.0832432
b0505	alla, eck0498, glxa2, jw0493, ybbt	ureidoglycolate hydrolase (ec:3,5,3,19)	0.04	0.05	0.095	0.12	0.136	0.0561011	0.0547008	0.0831473	0.0851056	0.0800138	1		1.4821
b0506	allr, eck0499, glxa3, jw0494, ybbu	dna-binding transcriptional repressor	0.194	0.251	0.571	0.76	1.087	0.269769	0.276212	0.498612	0.538016	0.63799	1	1.02389	1.84829	1.99436	2.36495	41	57	82	100	133	56.4816	62.7094	66.9905	68.6553	78.6412	1	1.11026	1.18606	1.21553	1.39233											209.37	227.033	134.354	127.608	123.264
b0507	gcl, eck0500, jw0495	glyoxylate carboligase (ec:4,1,1,47)	0.017	0.029	0.048	0.054	0.063	0.0239869	0.0316445	0.0422569	0.0384974	0.0369551
b0508	hyi, eck0501, gip, jw0496, ybbg	hydroxypyruvate isomerase (ec:5,3,1,22)	0.019	0.018	0.038	0.042	0.057	0.0262969	0.019627	0.0329296	0.0300707	0.0333705
b0509	glxr, eck0502, glxb1, jw0497, ybbq	tartronate semialdehyde reductase, nadh-dependent (ec:1,1,1,60)	0.153	0.277	0.223	0.443	0.584	0.21256	0.305163	0.195108	0.313365	0.342672	1	1.43566	0.917899	1.47425	1.61212
b0511	ybbw, allp, eck0504, glxb2, jw0499	predicted allantoin transporter	0.024	0.051	0.056	0.083	0.123	0.0337918	0.0566657	0.0485712	0.0586437	0.0721233
b0512	allb, eck0505, glxb3, jw0500, ybbx	allantoinase (ec:3,5,2,5)	0.059	0.113	0.118	0.163	0.197	0.0820374	0.124127	0.102905	0.115483	0.115903	1	1.51306	1.25437	1.40769	1.41281
b0513	ybby, eck0506, glxb4, jw0501	predicted uracil/xanthine transporter	0.039	0.031	0.05	0.072	0.137	0.0546916	0.0345882	0.0436318	0.0511283	0.0803798
b0514	glxk, eck0507, glxb5, jw0502, ybbz	glycerate kinase ii (ec:2,7,1,31)	0.842	0.81	0.947	1.553	1.899	1.17263	0.893163	0.827085	1.09889	1.11522	1	0.761674	0.705324	0.937117	0.951041
b0515	ylba, eck0508, glxb6, jw0503	conserved protein	0.066	0.126	0.23	0.277	0.348	0.091272	0.138596	0.201142	0.196384	0.204174	1	1.51849	2.20377	2.15164	2.23698	106					146.026																				1599.89
b0516	allc, eck0509, glxb7, jw0504, ylbb	allantoate amidohydrolase (ec:3,5,3,4)	0.053	0.093	0.124	0.158	0.195	0.0743616	0.103029	0.108396	0.112172	0.114461	1	1.38551	1.45769	1.50846	1.53924
b0517	alld, eck0510, glxb8, jw0505, ylbc	ureidoglycolate dehydrogenase (ec:1,1,1,154)	0.042	0.038	0.045	0.061	0.078	0.0587997	0.0417045	0.038964	0.0433061	0.0455669
b0518	fdra, eck0511, jw0506, ylbd	predicted acyl-coa synthetase with nad(p)-binding rossmann-fold	0.027	0.014	0.018	0.041	0.031	0.0370607	0.0156971	0.0159132	0.0288708	0.0182999
b0520	ylbf, eck0513, jw0509	conserved protein	0.048	0.059	0.058	0.082	0.12	0.066864	0.0654968	0.0504894	0.058346	0.0706916
b0521	ybcf, arcc, eck0514, jw0510	predicted carbamate kinase	0.031	0.029	0.041	0.062	0.072	0.0435374	0.0318874	0.0359509	0.0436039	0.0423375
b0522	purk, eck0515, jw0511, pure2	n5-carboxyaminoimidazole ribonucleotide synthase (ec:4,1,1,21)	0.153	0.162	0.499	0.808	1.538	0.212469	0.178335	0.436046	0.571704	0.903156	1	0.839348	2.05228	2.69077	4.25077	190			635		261.744			435.961		1			1.6656		0.0219918	0.0473323	0.0786433	0.112794	0.14486	1	2.15227	3.57602	5.12889	6.58699	1231.92			762.564		4.21502
b0523	pure, ade, ade3, eck0516, jw0512, pur2	n5-carboxyaminoimidazole ribonucleotide mutase (ec:4,1,1,21)	0.221	0.084	0.776	1.242	2.27	0.308	0.0927258	0.677256	0.879051	1.33267	1	0.301058	2.19888	2.85406	4.32684	852.5	1694	2568	3535	5340	1174.4	1863.68	2097.95	2426.96	3157.47	1	1.58691	1.78639	2.06655	2.68858	0.0219918	0.0473323	0.0786433	0.112794	0.14486	1	2.15227	3.57602	5.12889	6.58699	3813	20098.8	3097.72	2760.89	2369.29	0.939418	1.2741
b0524	lpxh, eck0517, jw0513, ybbf	udp-2,3-diacylglucosamine pyrophosphatase (ec:3,6,1,-)	0.156	0.134	0.434	0.636	0.855	0.216607	0.14792	0.378691	0.449906	0.501989	1	0.682896	1.74829	2.07706	2.31752
b0525	ppib, eck0518, jw0514	peptidyl-prolyl cis-trans isomerase b (rotamase b) (ec:5,2,1,8)	0.589	0.363	1.764	2.576	3.871	0.820314	0.400097	1.54056	1.82337	2.27314	1	0.487736	1.87801	2.22277	2.77106	2877	4103	4471	5363	7384	3963.35	4513.97	3652.62	3681.98	4366.06	1	1.13893	0.921597	0.929007	1.10161											4831.51	11282.2	2370.97	2019.33	1920.72
b0526	cyss, eck0519, jw0515	cysteinyl-trna synthetase (ec:6,1,1,16)	0.163	0.129	0.481	0.684	1.038	0.227222	0.141789	0.419581	0.483883	0.609636	1	0.624013	1.84657	2.12956	2.683	283.5	347	538	608.5	876.5	390.549	381.757	439.523	417.767	518.263	1	0.977487	1.1254	1.06969	1.32701	0.00527142	0.0098784	0.0142786	0.018032	0.0213091	1	1.87395	2.70868	3.42071	4.04239	1718.8	2692.42	1047.53	863.365	850.119	0.677122	1.29812
b0527	ybci, eck0520, jw0516	conserved inner membrane protein	0.04	0.033	0.067	0.099	0.137	0.0552016	0.0367959	0.0581784	0.069768	0.0807351
b0528	ybcj, eck0521, jw5070	predicted rna-binding protein	0.092	0.085	0.191	0.261	0.325	0.127974	0.0932188	0.166846	0.184656	0.19089	1	0.728421	1.30375	1.44292	1.49163	569.5	789	1004	1450	1934.5	784.543	868.03	820.225	995.502	1143.85	1	1.10641	1.04548	1.26889	1.45798											6130.5	9311.74	4916.05	5391.13	5992.17
b0529	fold, ads, eck0522, jw0518	bifunctional 5,10-methylene-tetrahydrofolate	0.288	0.218	0.967	1.471	2.372	0.401163	0.240888	0.844373	1.04085	1.39259	1	0.600475	2.10482	2.59459	3.47139	262.5	375.5	566.5	732.5	847.5	361.62	413.112	462.806	502.9	501.116	1	1.14239	1.27981	1.39069	1.38575											901.429	1714.95	548.106	483.161	359.844
b0530	sfma, eck0523, fima, fmae, jw0519	predicted fimbrial-like adhesin protein	0.016	0.032	0.044	0.075	0.101	0.0216787	0.0350813	0.0386923	0.0529327	0.0592057
b0531	sfmc, eck0524, fimc, jw0520	pilin chaperone, periplasmic	0.017	0.027	0.036	0.039	0.062	0.0232376	0.0296796	0.0312832	0.0276708	0.0365999
b0532	sfmd, eck0525, fimd, jw0521	predicted outer membrane export usher protein	0.203	0.396	0.283	0.51	0.624	0.282513	0.436157	0.246972	0.360587	0.366354	1	1.54385	0.874196	1.27635	1.29677
b0533	sfmh, eck0526, fimh, fmaf, jw5071	predicted fimbrial-like adhesin protein	0.021	0.024	0.035	0.048	0.072	0.029475	0.0267359	0.0307316	0.0339863	0.0423375
b0534	sfmf, eck0527, fimf, fmag, jw5072, ybcg	predicted fimbrial-like adhesin protein	0.323	0.445	0.459	0.777	0.962	0.449887	0.490858	0.400918	0.550051	0.56479	1	1.09107	0.891154	1.22264	1.25541
b0535	fimz, eck0528, jw5073, ybca	predicted dna-binding transcriptional regulator	0.009	0.022	0.036	0.049	0.05	0.0120834	0.0247784	0.0318347	0.0348885	0.0294199
b0536	argu, argw, dnay, eck0529, fimu, jwr0010, pin	trna-arg	0.349	0.205	1.085	1.818	1.305	0.486557	0.225927	0.94755	1.28655	0.766445	1	0.464338	1.94746	2.6442	1.57524																0.0307784	0.0594468	0.0888832	0.116144	0.140596	1	1.93144	2.88784	3.77355	4.568
b0537	intd, eck0530, int, jw0525	dlp12 prophage; predicted integrase	0.082	0.179	0.217	0.27	0.336	0.11394	0.197719	0.189074	0.190971	0.197349	1	1.73529	1.65941	1.67606	1.73204
b0543	emre, eb, eck0534, jw0531, mvrc	dlp12 prophage; multidrug resistance protein	0.022	0.046	0.109	0.14	0.188	0.0312129	0.0512715	0.0952243	0.0992432	0.110155
b0544	ybck, eck0535, jw0532	dlp12 prophage; predicted recombinase	0.027	0.072	0.069	0.111	0.178	0.0374808	0.0792364	0.0606481	0.0784924	0.104417
b0545	ybcl, eck0536, jw0533	dlp12 prophage; predicted kinase inhibitor	0.046	0.131	0.132	0.182	0.273	0.0643463	0.144483	0.115525	0.128718	0.160394	1	2.2454	1.79537	2.0004	2.49266
b0546	ybcm, eck0537, jw0534	dlp12 prophage; predicted dna-binding transcriptional regulator	0.078	0.134	0.201	0.287	0.361	0.109112	0.147427	0.175622	0.202998	0.212064	1	1.35114	1.60955	1.86044	1.94354
b0547	ybcn, eck0538, jw0535	dlp12 prophage; predicted protein	0.012	0.016	0.02	0.03	0.053	0.0173304	0.0181551	0.0175597	0.0213553	0.0308623
b0548	nine, eck0539, jw0536	dlp12 prophage; conserved protein	0.013	0.037	0.036	0.073	0.1	0.0182605	0.0408435	0.0316948	0.051426	0.0586675
b0549	ybco, eck0540, jw0537	dlp12 prophage; predicted protein	0.062	0.134	0.088	0.189	0.222	0.0856949	0.147427	0.0768331	0.133527	0.130253	1	1.72037		1.55817	1.51996
b0550	rusa, eck0541, jw0538, rus, ybcp	dlp12 prophage; endonuclease rus (ec:3,1,22,-)	0.13	0.209	0.184	0.377	0.732	0.181706	0.230836	0.160804	0.266757	0.429866	1	1.27038	0.884968	1.46807	2.36573
b0551	quud, eck0543, jw0539, ybcq	dlp12 prophage; predicted antitermination protein	0.017	0.049	0.064	0.1	0.12	0.0235678	0.054458	0.0557087	0.0706702	0.0703256
b0553	nmpc, eck0544, jw5078, phma	pseudogene	1.943	3.148	4.99	7.321	3.922	2.70609	3.47084	4.35659	5.1811	2.30292	1	1.2826	1.60992	1.91461	0.851012
b0554	essd, eck0545, jw0543, ybcr	dlp12 prophage; predicted phage lysis protein	0.048	0.096	0.128	0.187	0.223	0.0671042	0.105479	0.111409	0.132021	0.130974	1	1.57187	1.66024	1.9674	1.9518
b0555	arrd, eck0546, jw0544, ybcs	dlp12 prophage; predicted lysozyme	0.04	0.077	0.102	0.176	0.202	0.0557719	0.0851237	0.0886383	0.124505	0.118411	1	1.52628	1.5893	2.2324	2.12314
b0562	ybcy, eck0554, jw0551	pseudogene	0.045	0.094	0.145	0.221	0.232	0.0633568	0.103522	0.126507	0.156083	0.136356	1	1.63395	1.99675	2.46355	2.1522
b0564	appy, eck0556, jw0553	dna-binding transcriptional activator; dlp12 prophage	0.015	0.03	0.111	0.175	0.211	0.0212596	0.0328735	0.0971424	0.123603	0.124149
b0565	ompt, eck0557, jw0554	dlp12 prophage; outer membrane protease vii (outer membrane protein	1.831	2.839	4.679	8.024	10.36	2.54946	3.13084	4.08547	5.67882	6.08347	1	1.22804	1.60249	2.22746	2.38618	371.5	483	671	878	1057	511.778	531.379	548.178	602.793	624.991	1	1.0383	1.07112	1.17784	1.22121											200.74	169.724	134.177	106.148	102.736
b0566	envy, eck0558, jw0555	dna-binding transcriptional activator of porin biosynthesis	0.024	0.032	0.07	0.089	0.086	0.0337622	0.034831	0.0609198	0.0631548	0.050594
b0567	ybch, eck0559, jw0556	predicted protein	0.034	0.051	0.079	0.111	0.121	0.046925	0.055687	0.0688806	0.0787901	0.0710468
b0568	nfra, eck0560, jw0557	bacteriophage n4 receptor, outer membrane subunit	0.056	0.079	0.103	0.152	0.191	0.0772995	0.0870813	0.0897332	0.107363	0.112308	1	1.12654	1.16085	1.38892	1.45289
b0569	nfrb, eck0561, jw0558	bacteriophage n4 receptor, inner membrane subunit	0.03	0.065	0.08	0.128	0.145	0.0412589	0.07212	0.0697038	0.0908256	0.0850409
b0570	cuss, eck0562, jw5082, sils, ybcz	sensory histidine kinase in two-component regulatory system with	0.171	0.203	0.361	0.44	0.566	0.237926	0.223719	0.315301	0.311561	0.332273	1	0.940288	1.32521	1.30948	1.39654
b0571	cusr, eck0563, jw0560, silr, ylca	dna-binding response regulator in two-component regulatory system	0.321	0.227	0.599	0.716	1.055	0.446558	0.250455	0.52303	0.507043	0.61969	1	0.560858	1.17125	1.13545	1.3877	220.5	277	201.5	225	187.5	303.761	304.745	164.617	154.474	110.866	1	1.00324	0.54193	0.50854	0.364979											680.227	1216.77	314.737	304.658	178.906
b0572	cusc, eck0564, ibeb, jw0561, silc, ylcb	copper/silver efflux system, outer membrane component	0.815	0.686	1.449	1.724	2.867	1.13437	0.756031	1.26505	1.21979	1.68359	1	0.666477	1.1152	1.0753	1.48417	216	310	285.5	208	170.5	297.561	341.051	233.241	142.803	100.814	1	1.14615	0.783842	0.479911	0.338802											262.314	451.107	184.373	117.072	59.8805
b0573	cusf, cusx, eck0565, jw0562, silf, ylcc	periplasmic copper-binding protein	1.018	1.833	2.539	3.247	5.208	1.41754	2.02108	2.21699	2.29763	3.05824	1	1.42576	1.56397	1.62086	2.15743	1924	2441	2846	2258	2051	2650.5	2685.5	2325.06	1550.24	1212.73	1	1.0132	0.877215	0.584884	0.457547											1869.79	1328.75	1048.75	674.71	396.545
b0574	cusb, eck0566, jw0563, silb, ylcd	copper/silver efflux system, membrane fusion protein	0.331	0.664	0.818	1.014	1.448	0.461011	0.731746	0.714021	0.717862	0.850409	1	1.58726	1.54882	1.55715	1.84466	256	416	452.5	366	290	352.665	457.668	369.673	251.278	171.473	1	1.29774	1.04823	0.712512	0.486221											764.982	625.447	517.734	350.037	201.636
b0575	cusa, eck0567, jw0564, sila, ybde	copper/silver efflux system, membrane component	0.14	0.456	0.31	0.37	0.515	0.194299	0.503126	0.270575	0.261641	0.302487	1	2.58944	1.39257	1.34659	1.55681
b0576	phep, eck0568, jw0565	phenylalanine transporter	0.32	0.573	0.634	0.945	1.442	0.445448	0.631911	0.553769	0.668539	0.846825	1	1.4186	1.24318	1.50082	1.90106
b0577	ybdg, eck0569, jw0566	predicted mechanosensitive channel	0.1	0.16	0.287	0.41	0.661	0.138738	0.176621	0.250537	0.289908	0.387883	1	1.27305	1.80582	2.0896	2.79579
b0578	nfsb, dpra, eck0570, jw0567, nfnb, nfsi, ntr	dihydropteridine reductase, nad(p)h-dependent, oxygen-insensitive	0.272	0.37	0.747	0.946	1.389	0.379212	0.407699	0.652007	0.669441	0.815607	1	1.07512	1.71937	1.76535	2.15079	1090	1741	2343.5	2800.5	3593	1501.58	1915.39	1914.54	1922.69	2124.49	1	1.27558	1.27501	1.28044	1.41484											3959.74	4698.04	2936.38	2872.09	2604.8
b0579	ybdf, eck0571, jw5083	conserved protein	0.081	0.163	0.265	0.342	0.425	0.112322	0.179564	0.231331	0.24209	0.249385	1	1.59866	2.05953	2.15533	2.22027
b0580	ybdj, eck0572, jw0569	predicted inner membrane protein	0.34	0.479	0.715	0.983	1.267	0.472825	0.528147	0.624568	0.695605	0.743839	1	1.117	1.32093	1.47117	1.57318
b0581	ybdk, eck0573, jw0570	gamma-glutamyl:cysteine ligase (ec:6,3,2,2)	0.128	0.271	0.24	0.31	0.291	0.178497	0.29829	0.209926	0.219237	0.171158	1	1.67112	1.17608	1.22824	0.958887	701	639	692	555		965.697	703.005	565.334	381.037		1	0.727976	0.585416	0.394572												5410.16	2356.78	2693.01	1738.01
b0583	entd, eck0575, jw5085	phosphopantetheinyltransferase component of enterobactin synthase	0.037	0.088	0.117	0.155	0.177	0.0512437	0.0971413	0.10181	0.109772	0.103696
b0584	fepa, cbr, cbt, eck0576, fep, feub, jw5086	iron-enterobactin outer membrane transporter	0.111	0.237	0.292	0.399	0.5	0.15451	0.261494	0.254653	0.28269	0.29352	1	1.69241	1.64813	1.82959	1.89969
b0585	fes, eck0577, jw0576	enterobactin/ferric enterobactin esterase	0.035	0.09	0.088	0.131	0.183	0.0482158	0.099349	0.0768331	0.09263	0.107647
b0586	entf, eck0579, jw0578	enterobactin synthase multienzyme complex component, atp-dependent	0.057	0.13	0.132	0.184	0.227	0.0792479	0.143261	0.115254	0.130523	0.133127	1	1.80776	1.45434	1.64702	1.67988
b0587	fepe, eck0580, jw0579	regulator of length of o-antigen component of lipopolysaccharide	0.018	0.024	0.028	0.045	0.071	0.0257266	0.026	0.0246972	0.0315774	0.0419822
b0588	fepc, eck0581, jw0580	iron-enterobactin transporter subunit	0.079	0.111	0.196	0.292	0.379	0.110283	0.122163	0.171506	0.206309	0.222474	1	1.10772	1.55515	1.87073	2.0173
b0589	fepg, eck0582, jw0581	iron-enterobactin transporter subunit	0.049	0.083	0.108	0.148	0.183	0.0675837	0.0919899	0.094401	0.104657	0.107292	1	1.36113	1.3968	1.54855	1.58754
b0590	fepd, eck0583, jw0582	iron-enterobactin transporter subunit	0.073	0.109	0.114	0.18	0.338	0.101467	0.120448	0.0998838	0.127212	0.198425	1	1.18706	0.984394	1.25372	1.95556
b0591	ents, eck0584, jw0583, ybda	predicted transporter	0.169	0.328	0.347	0.509	0.711	0.235647	0.361336	0.302681	0.359982	0.417669	1	1.53338	1.28447	1.52763	1.77244
b0592	fepb, eck0585, jw0584	iron-enterobactin transporter subunit	0.115	0.179	0.223	0.334	0.429	0.160506	0.197469	0.194285	0.236379	0.251893	1	1.23029	1.21045	1.47271	1.56937	90	172	89		204	123.984	189.228	72.7092		120.623	1	1.52623	0.58644		0.972889											772.456	958.268	374.24		478.864
b0593	entc, eck0586, fepf, jw0585	isochorismate synthase 1 (ec:5,4,4,2)	0.071	0.102	0.219	0.297	0.413	0.0983495	0.112353	0.190992	0.210215	0.24256	1	1.14238	1.94197	2.13743	2.46631
b0594	ente, eck0587, jw0586	2,3-dihydroxybenzoate-amp ligase component of enterobactin synthase	0.121	0.255	0.301	0.478	0.576	0.168242	0.281364	0.263165	0.338329	0.338366	1	1.67237	1.56421	2.01096	2.01118
b0595	entb, eck0588, entg, jw0587	isochorismatase (ec:3,3,2,1)	0.099	0.224	0.243	0.318	0.359	0.13724	0.247512	0.212124	0.225255	0.210632	1	1.8035	1.54565	1.64132	1.53478
b0596	enta, eck0589, jw0588	2,3-dihydro-2,3-dihydroxybenzoate dehydrogenase (ec:1,3,1,28)	0.257	0.459	0.475	0.703	0.858	0.358163	0.506312	0.414913	0.497723	0.503787	1	1.41364	1.15845	1.38965	1.40658
b0597	enth, eck0590, jw0589, ybdb	conserved protein	0.141	0.266	0.267	0.357	0.4	0.195858	0.293389	0.232705	0.252321	0.23467	1	1.49797	1.18813	1.28829	1.19816
b0598	csta, eck0591, jw0590, ybdc	carbon starvation protein	2.978	4.834	3.239	3.058	0.883	4.14738	5.33002	2.82783	2.16411	0.518502	1	1.28515	0.681835	0.5218	0.125019	1042	1663	1663	1051	231	1435.46	1829.57	1358.6	721.567	136.587	1	1.27456	0.946457	0.502673	0.0951524											346.112	343.258	480.439	333.425	263.427
b0599	ybdh, eck0593, jw0592	predicted oxidoreductase	0.166	0.242	0.493	0.742	1.041	0.23181	0.266645	0.430283	0.525385	0.611433	1	1.15028	1.85619	2.26645	2.63765
b0600	ybdl, eck0594, jw0593	methionine aminotransferase, plp-dependent (ec:2,6,1,-)	0.113	0.104	0.358	0.489	0.622	0.157629	0.11456	0.31228	0.345845	0.365278	1	0.726774	1.98111	2.19405	2.31733
b0601	ybdm, eck0595, jw0594	conserved protein	0.044	0.083	0.127	0.182	0.262	0.0617385	0.0919899	0.111138	0.129016	0.15358	1	1.48999	1.80013	2.08972	2.48758
b0602	ybdn, eck0596, jw0595	conserved protein	0.019	0.033	0.059	0.076	0.098	0.0259668	0.03606	0.0513126	0.0535282	0.057774
b0603	ybdo, eck0597, jw0596	predicted dna-binding transcriptional regulator	0.01	0.013	0.036	0.042	0.047	0.0135227	0.0139825	0.0315548	0.029773	0.0276329
b0604	dsbg, eck0598, jw0597, ybdp	periplasmic disulfide isomerase/thiol-disulphide oxidase	0.098	0.18	0.351	0.495	0.74	0.136249	0.197962	0.306517	0.350058	0.434538	1	1.45295	2.24969	2.56926	3.1893	39	43	69.5	85	105	53.7264	47.3071	56.7785	58.357	62.0852	1	0.880518	1.05681	1.08619	1.15558											394.326	238.97	185.238	166.707	142.876
b0605	ahpc, eck0599, jw0598, tpx	alkyl hydroperoxide reductase, c22 subunit (ec:1,11,1,15)	2.411	3.529	4.406	6.151	8.412	3.35726	3.89105	3.84728	4.35287	4.93919	1	1.15899	1.14596	1.29655	1.47119	13400.5	20003.5	23349.5	23560.5	26638.5	18460.5	22007.1	19075.5	16175.5	15751	1	1.19212	1.03332	0.876223	0.853226											5498.68	5655.84	4958.19	3716.06	3188.99
b0606	ahpf, eck0600, jw0599	alkyl hydroperoxide reductase, f52a subunit, fad/nad(p)-binding	0.329	0.491	0.857	1.226	1.808	0.457682	0.541636	0.748054	0.867629	1.0614	1	1.18343	1.63444	1.8957	2.31907	502	682	1021.5	1124.5	1258.5	691.555	750.312	834.522	772.029	744.135	1	1.08496	1.20673	1.11637	1.07603											1510.99	1385.27	1115.59	889.814	701.09
b0607	uspg, eck0601, jw0600, up12, ybdq, yzzu	universal stress protein up12	0.199	0.219	0.495	0.596	0.605	0.277326	0.241139	0.432201	0.42163	0.355234	1	0.869513	1.55846	1.52034	1.28093	2533	2754	3568.5	3565	3620	3489.46	3029.85	2915.31	2447.56	2140.46	1	0.868287	0.835462	0.701415	0.613407											12582.5	12564.8	6745.26	5804.99	6025.49
b0608	ybdr, eck0602, jw0601	predicted oxidoreductase, zn-dependent and nad(p)-binding	0.17	0.167	0.191	0.236	0.295	0.236487	0.183737	0.166566	0.167207	0.173311	1	0.776942	0.704336	0.707044	0.732857	158					217.661																				920.392
b0610	rnk, eck0603, jw0602	regulator of nucleoside diphosphate kinase	0.455	0.39	0.94	1.11	1.02	0.633901	0.43027	0.820499	0.785222	0.598871	1	0.678764	1.29436	1.23871	0.944739	606					834.825																				1316.96
b0611	rna, eck0604, jw0603, rnsa	ribonuclease i (ec:3,1,27,6)	0.119	0.151	0.395	0.552	0.722	0.165874	0.166075	0.344666	0.39036	0.424128	1	1.00121	2.07788	2.35335	2.55693
b0612	citt, eck0605, jw0604, ybds	citrate:succinate antiporter	0.022	0.023	0.032	0.046	0.064	0.0311832	0.0255143	0.0279902	0.0324796	0.0373211
b0613	citg, eck0606, jw0605, ybdt	triphosphoribosyl-dephospho-coa transferase (ec:2,7,8,25)	0.02	0.008	0.01	0.015	0.015	0.0285161	0.00907388	0.00878398	0.0105288	0.00861174
b0614	citx, eck0607, jw0606, ybdu	apo-citrate lyase phosphoribosyl-dephospho-coa transferase	0.034	0.022	0.024	0.038	0.054	0.0476455	0.0237923	0.020581	0.0267686	0.0315728
b0615	citf, eck0608, jw5087, ybdv	citrate lyase, citrate-acp transferase (alpha) subunit (ec:4,1,3,6	0.022	0.017	0.024	0.051	0.066	0.0302846	0.0191339	0.020581	0.0360885	0.0387528
b0616	cite, eck0609, jw0608, ybdw	citrate lyase, citryl-acp lyase (beta) subunit (ec:4,1,3,6 4,1,3,34)	0.023	0.033	0.047	0.067	0.077	0.0320836	0.0365531	0.0414337	0.0472127	0.0452116
b0617	citd, eck0610, jw0609, ybdx	citrate lyase, acyl carrier (gamma) subunit (ec:4,1,3,6)	0.023	0.019	0.025	0.033	0.042	0.0325622	0.0208486	0.0216759	0.0231598	0.0244035
b0618	citc, eck0611, jw0610, ybeo	citrate lyase synthetase (ec:6,2,1,22)	0.019	0.008	0.01	0.012	0.022	0.0259362	0.00883103	0.00878398	0.00841763	0.0129176
b0619	dpib, cita, eck0612, jw0611, mpdb, ybep	sensory histidine kinase in two-component regulatory system with	0.04	0.059	0.109	0.15	0.207	0.0554418	0.0650037	0.0952243	0.106461	0.121286	1		1.71755	1.92023	2.18762
b0620	dpia, citb, crir, eck0613, jw0612, mpda	dna-binding response regulator in two-component regulatory system	0.048	0.107	0.16	0.222	0.302	0.0668658	0.118483	0.139399	0.156985	0.177262	1	1.77195	2.08476	2.34776	2.65101
b0621	dcuc, eck0614, jw0613, jw0616	anaerobic c4-dicarboxylate transport	0.029	0.04	0.051	0.071	0.097	0.040989	0.044398	0.0441833	0.0505238	0.0570528
b0622	pagp, crca, eck0615, jw0617, ybeg	palmitoyl transferase for lipid a (ec:2,3,1,-)	0.028	0.043	0.068	0.092	0.124	0.0384712	0.0473417	0.059545	0.0652569	0.0728445
b0623	cspe, eck0616, gica, jw0618, msmc	dna-binding transcriptional repressor	3.517	3.201	3.324	4.422	7.013	4.89727	3.52922	2.90248	3.12977	4.11784	1	0.720652	0.592673	0.639085	0.840845	11174.5	16328	20332.5	28354	34101	15394	17963.5	16610.8	19466.5	20163.5	1	1.16692	1.07904	1.26455	1.30983											3143.38	5089.92	5722.97	6219.79	4896.61
b0624	crcb, eck0617, jw0619, ybei	predicted inner membrane protein associated with chromosome	0.106	0.167	0.255	0.388	0.557	0.147372	0.184223	0.222275	0.274877	0.326891	1	1.25005	1.50826	1.86519	2.21813
b0627	tate, eck0620, jw0622, ybec	tatabce protein translocation system subunit	0.349	0.4	0.703	0.966	1.281	0.486467	0.441183	0.613726	0.683876	0.751912	1	0.906913	1.2616	1.4058	1.54566
b0628	lipa, eck0621, jw0623, lip	lipoate synthase (ec:2,8,1,-)	0.442	0.552	0.948	1.236	1.539	0.61582	0.609098	0.827629	0.874847	0.903877	1	0.989084	1.34395	1.42062	1.46776	379	510	578	632	743	522.11	561.084	472.201	433.901	439.326	1	1.07465	0.904409	0.831053	0.841444											847.829	921.172	570.547	495.974	486.046
b0629	ybef, eck0622, jw0624	predicted dna-binding transcriptional regulator	0.03	0.048	0.125	0.207	0.347	0.041678	0.0524931	0.108939	0.146456	0.203808
b0630	lipb, cde, eck0623, jw5089	lipoyl-protein ligase (ec:2,3,1,-)	0.119	0.137	0.358	0.541	0.641	0.165244	0.151106	0.31228	0.382835	0.376408	1	0.914442	1.88981	2.31679	2.27789
b0631	ybed, eck0624, jw0626	conserved protein	0.484	0.631	0.819	0.975	1.388	0.673511	0.695443	0.715396	0.690192	0.814886	1	1.03256	1.06219	1.02477	1.20991	2319	2527	2734	3187.5	4186	3194.65	2780.11	2233.56	2188.39	2475.13	1	0.87024	0.699156	0.685016	0.774772											4743.29	3997.62	3122.13	3170.7	3037.39
b0632	daca, eck0625, jw0627, pfv	d-alanyl-d-alanine carboxypeptidase (penicillin-binding protein 5)	0.185	0.207	0.847	1.337	2.281	0.257147	0.228628	0.739542	0.94642	1.33913	1	0.889095	2.87595	3.68047	5.20763	442	640	1014	1248	1674	608.899	704.105	828.395	856.818	989.815	1	1.15636	1.36048	1.40716	1.62558											2367.91	3079.7	1120.15	905.326	739.15
b0633	rlpa, eck0626, jw0628	minor lipoprotein	0.285	0.381	0.87	1.248	1.464	0.396754	0.419717	0.759851	0.882967	0.859376	1	1.05788	1.91517	2.22548	2.16602	27	44	48	52	77.5	37.1952	48.4072	39.2139	35.7007	45.8248	1	1.30144	1.05427	0.959822	1.23201											93.7487	115.333	51.6074	40.4327	53.3233
b0634	mrdb, eck0627, jw0629, roda	cell wall shape-determining protein	0.327	0.518	0.724	1.061	1.552	0.455283	0.571073	0.632249	0.750937	0.911047	1	1.25433	1.38869	1.64939	2.00106
b0635	mrda, eck0628, jw0630, pbpa	transpeptidase involved in peptidoglycan synthesis	0.05	0.114	0.228	0.3	0.564	0.0690247	0.126085	0.198953	0.212317	0.331197	1	1.82666	2.88234	3.07596	4.79823
b0636	rlmh, eck0629, jw0631, ybea	23s rrna m(3)psi1915 pseudouridine methyltransferase; sam-dependent	0.128	0.13	0.533	0.744	1.057	0.177928	0.143747	0.465683	0.526287	0.6204	1	0.807892	2.61725	2.95786	3.4868
b0637	ybeb, eck0630, jw5090	predicted protein	0.169	0.155	0.667	0.949	1.395	0.235737	0.171226	0.582031	0.671543	0.818836	1	0.726345	2.46899	2.8487	3.47352
b0638	cobc, eck0631, jw0633, phpb	predicted alpha-ribazole-5'-p phosphatase	0.048	0.084	0.157	0.221	0.337	0.0671051	0.0927258	0.13721	0.156687	0.19807	1	1.3818	2.0447	2.33495	2.95164
b0639	nadd, eck0632, fusb, jw0634, yben	nicotinic acid mononucleotide adenylyltransferase, nad(p)-dependent	0.152	0.201	0.419	0.6	0.915	0.211989	0.221269	0.365519	0.424942	0.537157	1	1.04377	1.72423	2.00454	2.53389
b0640	hola, eck0633, jw0635	dna polymerase iii, delta subunit (ec:2,7,7,7)	0.146	0.179	0.422	0.651	0.866	0.203265	0.197226	0.36826	0.460732	0.508448	1	0.970293	1.81173	2.26666	2.50141
b0641	lpte, eck0634, jw0636, rlpb	minor lipoprotein	0.37	0.653	0.954	1.406	1.792	0.514533	0.719486	0.833391	0.995139	1.05206	1	1.39833	1.61971	1.93406	2.0447
b0642	leus, eck0635, jw0637	leucyl-trna synthetase (ec:6,1,1,4)	0.621	1.035	1.45	2.08	3.401	0.86475	1.14067	1.26559	1.47211	1.99685	1	1.31908	1.46354	1.70235	2.30916	1261.5	1826	2352	2706	3014	1737.84	2008.9	1921.48	1857.81	1782.14	1	1.15597	1.10567	1.06903	1.02549	0.0503626	0.0954324	0.139705	0.178752	0.213232	1	1.89491	2.77397	3.5493	4.23394	2009.65	1761.15	1518.25	1262.01	892.477	1.45383	2.38316
b0643	ybel, eck0636, jw0638	conserved protein	0.926	1.641	1.202	1.632	1.946	1.28876	1.80889	1.04963	1.15513	1.14285	1	1.40359	0.814451	0.89631	0.886785	1189.5	1093.5	1035.5	1009	879.5	1638.65	1203.03	845.959	692.732	520.037	1	0.734157	0.516252	0.422744	0.317356											1271.5	665.066	805.958	599.701	455.034
b0644	ybeq, eck0637, jw5091	conserved protein	0.025	0.044	0.061	0.073	0.093	0.0347516	0.0485706	0.053239	0.051426	0.0548998
b0645	yber, eck0638, jw0640	predicted protein	0.012	0.007	0.012	0.015	0.022	0.0164021	0.00785225	0.0107021	0.0108265	0.0129176
b0646	djlb, eck0639, jw0641, ybes	predicted chaperone	0.02	0.032	0.044	0.063	0.086	0.0276156	0.0353241	0.0381407	0.0448128	0.050594
b0647	ybet, eck0640, jw0642	conserved outer membrane protein	0.013	0.023	0.032	0.046	0.058	0.0177802	0.0255143	0.0279902	0.0327773	0.0340917
b0648	ybeu, eck0641, jw0643	predicted trna ligase	0.054	0.1	0.083	0.147	0.18	0.0751406	0.110631	0.0721735	0.104359	0.105849	1	1.47231		1.38885
b0649	djlc, eck0642, hscd, jw0644, ybev	hsc56 co-chaperone of hscc	0.145	0.292	0.25	0.351	0.428	0.202065	0.32209	0.21871	0.248713	0.251538	1	1.59399	1.08238	1.23086	1.24484
b0650	hscc, eck0643, jw0645, ybew	hsp70 family chaperone hsc62, binds to rpod and inhibits	0.032	0.044	0.089	0.113	0.113	0.0447958	0.0480776	0.0779362	0.0802968	0.0663857
b0651	riha, eck0644, jw0646, ybek	ribonucleoside hydrolase 1 (ec:3,2,2,-)	0.226	0.497	0.737	0.927	0.587	0.314027	0.548502	0.643503	0.656205	0.34447	1	1.74667	2.0492	2.08965	1.09694	103.5	165	185.5	183	128.5	142.582	181.527	151.546	125.639	75.9804	1	1.27315	1.06287	0.881174	0.532891											454.043	330.95	235.501	191.463	220.572
b0652	gltl, eck0645, jw0647	glutamate and aspartate transporter subunit	0.106	0.333	0.3	0.363	0.455	0.147613	0.366981	0.261791	0.256832	0.267319	1	2.4861	1.77349	1.7399	1.81094
b0653	gltk, eck0646, jw0648	glutamate and aspartate transporter subunit	0.115	0.409	0.346	0.432	0.561	0.159997	0.450875	0.301858	0.30585	0.329399	1	2.81802	1.88664	1.91159	2.05878
b0654	gltj, eck0647, jw0649	glutamate and aspartate transporter subunit	0.137	0.434	0.371	0.472	0.558	0.190911	0.47859	0.323805	0.334116	0.327601	1	2.50687	1.6961	1.75011	1.71599
b0655	glti, eck0648, jw5092, ybej, yzzk	glutamate and aspartate transporter subunit	1.002	1.688	1.722	2.053	2.028	1.39523	1.86163	1.50324	1.45316	1.19057	1	1.33428	1.07741	1.04152	0.853314	3140	3453.5	3836	3303	3128.5	4325.66	3799.42	3133.85	2267.68	1849.84	1	0.878343	0.724478	0.52424	0.427644											3100.31	2040.91	2084.73	1560.51	1553.74
b0657	lnt, cute, eck0649, jw0654	apolipoprotein n-acyltransferase (ec:2,3,1,-)	0.102	0.143	0.306	0.397	0.749	0.142006	0.15798	0.267553	0.281192	0.439554	1	1.11248	1.88409	1.98014	3.09531
b0658	ybex, corc, eck0650, jw0655	predicteed ion transport	0.536	0.739	1.231	1.579	2.513	0.746311	0.814905	1.0746	1.11724	1.47584	1	1.09191	1.43988	1.49701	1.97751	130	183	254.5	269.5	292	179.088	201.33	207.916	185.026	172.656	1	1.1242	1.16097	1.03316	0.964084											239.964	247.06	193.482	165.611	116.988
b0659	ybey, eck0651, jw0656	conserved protein	0.39	0.684	0.893	1.255	1.649	0.543527	0.754074	0.779337	0.888074	0.968465	1	1.38737	1.43385	1.63391	1.78182
b0660	ybez, eck0652, jw0657, phol	predicted protein with nucleoside triphosphate hydrolase domain	0.239	0.476	0.651	0.977	1.385	0.333007	0.524953	0.568588	0.691698	0.813454	1	1.5764	1.70744	2.07713	2.44275	487	546	855	987.5	1277	670.891	600.69	698.498	677.971	755.074	1	0.895361	1.04115	1.01055	1.12548											2014.65	1144.27	1228.48	980.154	928.232
b0661	miab, eck0653, jw0658, ylea	isopentenyl-adenosine a37 trna methylthiolase	0.133	0.129	0.462	0.64	1.124	0.184854	0.142768	0.403388	0.45291	0.659875	1	0.77233	2.1822	2.4501	3.56971
b0662	ubif, eck0654, jw0659, yleb	2-octaprenyl-3-methyl-6-methoxy-1,4-benzoquinol oxygenase	0.16	0.2	0.358	0.49	0.604	0.222185	0.221018	0.31256	0.347054	0.354513	1	0.994752	1.40676	1.56201	1.59558	63.5	65	74	87.5	100	87.4776	71.5107	60.4548	60.0734	59.1287	1	0.817474	0.69109	0.686729	0.67593											393.716	323.551	193.418	173.095	166.789
b0665	glnv, eck0656, glnvalpha, jwr0012, su2, suii, supe	trna-gln	2.529	1.721	4.627	5.211	4.622	3.52212	1.8972	4.03964	3.68824	2.71377	1	0.538653	1.14694	1.04716	0.770495																0.0202017	0.0382494	0.0559426	0.071512	0.0852499	1	1.89337	2.7692	3.5399	4.21993
b0670	glnu, eck0659, glnualpha, jwr0015, supb	trna-gln	2.156	1.269	4.116	5.568	4.51	3.00282	1.39972	3.59345	3.94086	2.64811	1	0.466134	1.19669	1.31239	0.881875																0.0202017	0.0382494	0.0559426	0.071512	0.0852499	1	1.89337	2.7692	3.5399	4.21993
b0672	leuw, eck0660, feeb, jwr0016	trna-leu	0.89	0.362	2.929	3.768	3.172	1.23956	0.399604	2.55781	2.66694	1.86229	1	0.322377	2.06349	2.15153	1.50238																0.0503626	0.0954324	0.139705	0.178752	0.213232	1	1.89491	2.77397	3.5493	4.23394
b0673	mett, eck0661, jwr0017, mettalpha	trna-met	1.814	0.665	3.935	6.002	4.658	2.52544	0.732975	3.43538	4.24761	2.7353	1	0.290237	1.36031	1.68193	1.0831																0.0096404	0.019992	0.032116	0.0448	0.0565824	1	2.07377	3.3314	4.64711	5.8693
b0674	asnb, eck0662, jw0660	asparagine synthetase b (ec:6,3,5,4)	0.122	0.204	0.535	0.773	1.049	0.170041	0.224698	0.467049	0.547345	0.615739	1	1.32143	2.74668	3.21889	3.62112	299.5	478	824	1100	1253	412.591	525.878	673.173	755.208	740.883	1	1.27458	1.63157	1.8304	1.79568											2426.42	2340.38	1441.33	1379.77	1203.24
b0675	nagd, eck0663, jw0661	ump phosphatase	0.69	0.699	1.116	1.605	2.075	0.960881	0.770507	0.974445	1.13588	1.21821	1	0.801876	1.01412	1.18213	1.2678	430.5	529	644.5	695	839	593.057	581.987	526.529	477.154	496.09	1	0.981334	0.887822	0.804568	0.836497											617.201	755.33	540.337	420.073	407.23
b0676	nagc, eck0664, jw0662, nagr	dna-binding transcriptional dual regulator, repressor of	0.131	0.246	0.396	0.527	0.796	0.182066	0.271554	0.345489	0.372911	0.467187	1	1.49151	1.8976	2.04822	2.56603	30	39.5	59	48	45.5	41.328	43.4565	48.2005	32.9545	26.9036	1	1.0515	1.16629	0.79739	0.650977											226.994	160.029	139.514	88.3711	57.5863
b0677	naga, eck0665, jw0663	n-acetylglucosamine-6-phosphate deacetylase (ec:3,5,1,25)	0.265	0.42	0.605	0.812	1.009	0.368898	0.463136	0.528249	0.575006	0.592412	1	1.25546	1.43196	1.55871	1.6059	181.5		179			250.034		146.235			1		0.584861													677.787		276.83
b0678	nagb, eck0666, glmd, jw0664	glucosamine-6-phosphate deaminase (ec:3,5,99,6)	0.263	0.493	0.702	0.9	1.17	0.36653	0.543844	0.613314	0.637259	0.687141	1	1.48376	1.6733	1.73863	1.87472	1169.5	1256	1478	1412.5	1288	1611.1	1381.81	1207.46	969.756	761.578	1	0.857677	0.749464	0.601921	0.472706											4395.56	2540.81	1968.75	1521.76	1108.33
b0679	nage, eck0667, jw0665, pstn, ptsn	fused n-acetyl glucosamine specific pts enzyme: iic, iib , and iia	0.262	0.574	0.563	0.623	0.439	0.36482	0.63289	0.491746	0.440884	0.257997	1	1.7348	1.34792	1.2085	0.70719	649.5	896	798	590.5	326	894.751	985.747	651.932	405.409	192.76	1	1.1017	0.728618	0.453098	0.215434											2452.58	1557.53	1325.75	919.539	747.139
b0680	glns, eck0668, jw0666	glutamyl-trna synthetase (ec:6,1,1,18)	0.259	0.415	0.824	1.173	1.751	0.359994	0.457248	0.719241	0.830034	1.02838	1	1.27016	1.99793	2.30569	2.85666	872.5	1175.5	1732	2076	2427.5	1201.96	1293.24	1414.97	1425.28	1435.35	1	1.07595	1.17722	1.1858	1.19418	0.0202017	0.0382494	0.0559426	0.071512	0.0852499	1	1.89337	2.7692	3.5399	4.21993	3338.82	2828.32	1967.31	1717.14	1395.74	0.84317	1.48375
b0681	ybfm, eck0669, jw0667	predicted outer membrane porin	0.016	0.022	0.033	0.042	0.051	0.0224874	0.0242853	0.0290851	0.0300707	0.0301411
b0682	ybfn, eck0670, jw0668	predicted lipoprotein	0.024	0.053	0.083	0.11	0.143	0.0336722	0.0578947	0.0721735	0.0775902	0.0839645
b0683	fur, eck0671, jw0669	dna-binding transcriptional dual regulator of siderophore	1.382	1.774	2.528	3.444	5.538	1.92464	1.95583	2.20684	2.43748	3.25165	1	1.01621	1.14662	1.26646	1.68949	2342.5	2607	3067.5	3069.5	3576	3227.03	2868.13	2506.02	2107.37	2114.44	1	0.888783	0.776571	0.653039	0.655229											1676.69	1466.45	1135.57	864.572	650.267
b0684	flda, eck0672, jw0671	flavodoxin 1	0.66	0.501	1.7	2.561	3.714	0.919472	0.552918	1.48403	1.81224	2.18057	1	0.601343	1.614	1.97096	2.37154	195	220.5	241	276	331	268.632	242.586	196.887	189.489	195.716	1	0.903043	0.732924	0.705384	0.728566											292.159	438.738	132.67	104.56	89.7546
b0685	ybfe, eck0673, jw5816	lexa-regulated predicted protein	0.079	0.056	0.262	0.406	0.464	0.110493	0.06206	0.228589	0.287201	0.272346	1		2.06881	2.59926	2.46482
b0686	ybff, eck0674, jw0673	conserved protein	0.105	0.108	0.334	0.498	0.544	0.146385	0.118976	0.291699	0.35216	0.319711	1	0.812764	1.99269	2.40572	2.18405	454.5	585.5	716	871.5	847.5	626.119	644.146	584.941	598.331	501.116	1	1.02879	0.934234	0.955618	0.800353											4277.22	5414.08	2005.29	1699.03	1567.4
b0687	seqa, eck0675, jw0674	regulatory protein for replication initiation	0.504	0.593	1.09	1.508	2.134	0.702026	0.654232	0.951938	1.06732	1.25301	1	0.93192	1.35599	1.52034	1.78485	379	456	505.5	538	703	522.11	501.675	412.972	369.365	415.675	1	0.96086	0.790967	0.707447	0.796144											743.72	766.815	433.822	346.069	331.742
b0688	pgm, blu, eck0676, jw0675, pgma	phosphoglucomutase (ec:5,4,2,2)	0.519	0.766	1.179	1.533	1.966	0.723254	0.844592	1.0296	1.08476	1.15469	1	1.16777	1.42357	1.49983	1.59653	1229	1516.5	1896.5	1867	2003.5	1693.07	1668.4	1549.36	1281.79	1184.64	1	0.985428	0.915118	0.757083	0.699702											2340.91	1975.39	1504.81	1181.64	1025.94
b0689	ybfp, eck0677, jw0676	predicted protein	0.015	0.03	0.064	0.074	0.128	0.0208997	0.0328735	0.0557087	0.0520305	0.0753527
b0691	ybfg, eck0678, jw5094, ybfh	pseudogene	0.01	0.012	0.022	0.032	0.037	0.0144213	0.0132465	0.0192062	0.0225553	0.0215293
b0692	pote, eck0680, jw0679	putrescine/proton symporter: putrescine/ornithine antiporter	0.042	0.065	0.095	0.128	0.174	0.0586495	0.07212	0.0831473	0.0905189	0.101909	1		1.4177	1.54339
b0693	spef, eck0681, jw0680	ornithine decarboxylase isozyme, inducible (ec:4,1,1,17)	0.076	0.106	0.14	0.222	0.275	0.105395	0.117254	0.122391	0.156985	0.16147	1	1.11252	1.16127	1.48949	1.53205
b0694	kdpe, eck0682, jw5096	dna-binding response regulator in two-component regulatory system	0.106	0.118	0.161	0.241	0.285	0.147554	0.1305	0.140223	0.170518	0.167574	1	0.884426	0.950314	1.15563	1.13568
b0695	kdpd, eck0683, jw0683, kac	fused sensory histidine kinase in two-component regulatory system	0.135	0.196	0.219	0.281	0.354	0.187403	0.215624	0.191543	0.198784	0.207758	1	1.15059	1.02209	1.06073	1.10862
b0696	kdpc, eck0684, jw0684, kac	potassium translocating atpase, subunit c (ec:3,6,3,12)	0.121	0.142	0.192	0.26	0.351	0.167882	0.156751	0.167941	0.183753	0.205961	1	0.933698	1.00035	1.09454	1.22682
b0697	kdpb, eck0685, jw0685, kac	potassium translocating atpase, subunit b (ec:3,6,3,12)	0.085	0.132	0.142	0.214	0.32	0.117689	0.145712	0.124309	0.151274	0.188027	1	1.23811	1.05626	1.28537	1.59766
b0698	kdpa, eck0686, jw0686, kac	potassium translocating atpase, subunit a (ec:3,6,3,12)	0.189	0.273	0.28	0.487	0.784	0.263442	0.300991	0.244231	0.344942	0.460373	1	1.14253	0.927075	1.30937	1.74753
b0699	ybfa, eck0688, jw0688	predicted protein	0.026	0.048	0.105	0.151	0.416	0.0363105	0.053229	0.0916514	0.107065	0.244358
b0700	rhsc, eck0689, jw0689	rhsc element core protein rshc	0.194	0.085	0.113	0.167	0.222	0.270789	0.0937045	0.0987889	0.118487	0.130608	1	0.346043	0.364819	0.437564	0.482323
b0702	ybfb, eck0690, jw0691	predicted inner membrane protein	0.014	0.019	0.033	0.041	0.044	0.0194002	0.0208486	0.0285418	0.0288708	0.0258352
b0703	ybfo, eck0691, jw0692	pseudogene	0.238	0.131	0.148	0.223	0.318	0.331658	0.144733	0.128977	0.157589	0.186584	1	0.436393	0.388886	0.475156	0.56258
b0704	ybfc, eck0692, jw0693	predicted protein	0.018	0.025	0.055	0.076	0.088	0.0247371	0.0274718	0.0482995	0.0541327	0.0516704
b0705	ybfl, eck0694, jw0695	pseudogene	0.077	0.051	0.061	0.099	0.131	0.106656	0.055687	0.0529591	0.069768	0.0771504
b0706	ybfd, eck0695, jw0696	conserved protein	0.069	0.043	0.045	0.074	0.108	0.0957103	0.0470988	0.038964	0.0523283	0.0635116
b0707	ybga, eck0696, jw0697, tkp	conserved protein	0.171	0.263	0.336	0.484	0.782	0.238016	0.289459	0.293074	0.342236	0.45893	1	1.21613	1.23132	1.43787	1.92815
b0708	phr, eck0697, jw0698, phrb	deoxyribodipyrimidine photolyase, fad-binding (ec:4,1,99,3)	0.074	0.135	0.163	0.209	0.368	0.102486	0.148656	0.142692	0.147963	0.216015	1	1.45049	1.3923	1.44373	2.10774
b0709	ybgh, eck0698, jw0699	predicted transporter	0.059	0.051	0.096	0.139	0.316	0.0815273	0.055687	0.0839706	0.098341	0.185508	1		1.02997	1.20623	2.2754
b0710	ybgi, eck0699, jw0700	conserved metal-binding protein	0.373	0.523	1.036	1.407	1.692	0.51942	0.576467	0.904742	0.996041	0.993579	1	1.10983	1.74183	1.9176	1.91286	653	821.5	934	1063	955	899.572	903.785	763.038	729.806	564.679	1	1.00468	0.848223	0.811281	0.62772											1731.88	1567.8	843.377	732.706	568.328
b0711	ybgj, eck0700, jw0701	predicted enzyme subunit	0.487	0.752	1.202	1.68	1.902	0.678008	0.828887	1.04963	1.18911	1.11665	1	1.22253	1.54811	1.75383	1.64696
b0712	ybgk, eck0701, jw0702	predicted enzyme subunit	0.264	0.481	0.718	0.958	1.174	0.367699	0.53084	0.626486	0.678165	0.689294	1	1.44368	1.7038	1.84435	1.87461	70	86	113	112	115	96.432	94.6141	92.3162	76.8939	67.998	1	0.981149	0.957319	0.79739	0.70514											262.258	178.235	147.355	113.385	98.6488
b0713	ybgl, eck0702, jw0703	predicted lactam utilization protein	0.185	0.349	0.514	0.708	0.882	0.257806	0.384886	0.448666	0.500727	0.517781	1	1.49293	1.74032	1.94226	2.00841
b0714	nei, eck0703, jw0704	endonuclease viii/5-formyluracil/5-hydroxymethyluracil dna	0.071	0.147	0.203	0.28	0.518	0.099428	0.162145	0.176997	0.198486	0.304285	1	1.63078	1.78015	1.99628	3.06035
b0715	abrb, eck0704, jw5097, ybgn	predicted regulator	0.019	0.014	0.031	0.045	0.051	0.0259065	0.0152114	0.0271669	0.0318751	0.0297859
b0716	ybgo, eck0705, jw5098	predicted fimbrial-like adhesin protein	0.01	0.022	0.025	0.036	0.045	0.0140633	0.0237923	0.0222275	0.0252619	0.0265565
b0717	ybgp, eck0706, jw0707	predicted assembly protein	0.014	0.034	0.046	0.065	0.074	0.0201198	0.037289	0.0397872	0.0460128	0.0434139
b0718	ybgq, eck0707, jw5099	predicted outer membrane protein	0.029	0.021	0.023	0.037	0.052	0.0408981	0.0233065	0.0203094	0.0258664	0.0304963
b0719	ybgd, eck0708, fmah, jw0709	predicted fimbrial-like adhesin protein	0.011	0.02	0.027	0.04	0.064	0.0146624	0.0223204	0.0236023	0.028573	0.0373211
b0720	glta, eck0709, glut, icdb, jw0710	citrate synthase (ec:2,3,3,1)	2.029	4.475	5.215	7.569	4.506	2.82501	4.93384	4.55362	5.35703	2.6456	1	1.74649	1.61189	1.89629	0.936492	6048	9697	10764	10610	7854.5	8331.72	10668.3	8793.73	7284.33	4644.27	1	1.28044	1.05545	0.874288	0.55742	1.39943	2.45686	3.02046	3.16887	3.21147	1	1.75562	2.15835	2.26441	2.29485	2949.27	2162.27	1931.15	1359.77	1755.47	8.42618	11.5531
b0721	sdhc, cyba, eck0710, jw0711	succinate dehydrogenase, membrane subunit, binds cytochrome b556	1.505	2.779	4.74	6.96	4.115	2.09498	3.06437	4.13843	4.92578	2.41631	1	1.46272	1.9754	2.35123	1.15338																2.642	4.62095	5.61861	5.80647	5.8221	1	1.74903	2.12665	2.19775	2.20367
b0722	sdhd, eck0711, jw0712	succinate dehydrogenase, membrane subunit, binds cytochrome b556	1.158	2.159	3.91	5.667	3.313	1.61247	2.38094	3.41425	4.01093	1.94518	1	1.47658	2.1174	2.48744	1.20633	223.5	579	760	666	363	307.893	636.995	620.888	457.244	214.637	1	2.06888	2.01657	1.48507	0.697115	2.642	4.62095	5.61861	5.80647	5.8221	1	1.74903	2.12665	2.19775	2.20367	190.945	267.539	181.852	113.999	110.343	430.475	363.924
b0723	sdha, eck0712, jw0713	succinate dehydrogenase, flavoprotein subunit (ec:1,3,99,1)	1.133	3.057	3.564	5.129	2.55	1.57763	3.37027	3.11212	3.6296	1.49737	1	2.13629	1.97266	2.30067	0.949124	2134	3905.5	5908	5970	4187	2939.8	4296.69	4826.58	4098.72	2475.72	1	1.46156	1.64181	1.39422	0.84214	2.642	4.62095	5.61861	5.80647	5.8221	1	1.74903	2.12665	2.19775	2.20367	1863.43	1274.88	1550.9	1129.25	1653.38	45.0849	53.9526
b0724	sdhb, eck0713, jw0714	succinate dehydrogenase, fes subunit (ec:1,3,99,1)	1.178	3.223	4.067	5.489	2.556	1.64048	3.55351	3.55064	3.88492	1.5006	1	2.16614	2.16439	2.36817	0.914731	2215	3772	5414.5	6633.5	3908	3051.38	4149.82	4423.42	4554.25	2310.75	1	1.35998	1.44964	1.49252	0.75728	2.642	4.62095	5.61861	5.80647	5.8221	1	1.74903	2.12665	2.19775	2.20367	1860.06	1167.81	1245.81	1172.29	1539.89	43.4362	55.8621
b0726	suca, eck0714, jw0715, lys	2-oxoglutarate decarboxylase, thiamin-requiring (ec:1,2,4,2)	0.848	2.495	2.786	3.904	2.353	1.1804	2.75111	2.43212	2.76287	1.38146	1	2.33066	2.06043	2.34063	1.17034	1483.5	2641	3893.5	4636	3594.5	2043.67	2905.53	3180.82	3182.86	2125.38	1	1.42172	1.55643	1.55742	1.03998	1.30423	2.27533	2.75285	2.82401	2.79801	1	1.74458	2.11071	2.16527	2.14533	1731.34	1056.13	1307.84	1152.01	1538.5	32.0154	39.2857
b0727	sucb, eck0715, jw0716	dihydrolipoyltranssuccinase (ec:2,3,1,61)	1.338	3.727	4.202	5.941	4.012	1.8638	4.10913	3.66863	4.2046	2.35603	1	2.2047	1.96836	2.25593	1.2641	2577	4228	6507	7238.5	6900	3550.07	4651.49	5315.94	4969.61	4079.88	1	1.31025	1.49742	1.39986	1.14924	1.30423	2.27533	2.75285	2.82401	2.79801	1	1.74458	2.11071	2.16527	2.14533	1904.75	1131.99	1449.03	1181.95	1731.68	18.4303	24.5396
b0728	succ, eck0716, jw0717	succinyl-coa synthetase, beta subunit (ec:6,2,1,5)	1.851	4.096	5.04	7.594	4.148	2.57722	4.51683	4.40077	5.37447	2.43569	1	1.7526	1.70757	2.08538	0.945084	5470	9539.5	12948	14322	9886.5	7535.47	10495	10578	9832.81	5845.76	1	1.39275	1.40376	1.30487	0.775766	1.30423	2.27533	2.75285	2.82401	2.79801	1	1.74458	2.11071	2.16527	2.14533	2923.87	2323.54	2403.66	1829.54	2400.04	8.68279	10.8762
b0729	sucd, eck0717, jw0718	succinyl-coa synthetase, nad(p)-binding, alpha subunit (ec:6,2,1,5)	1.637	4.368	5.177	6.7	3.723	2.27879	4.81585	4.51986	4.74142	2.18595	1	2.11334	1.98345	2.08068	0.959261	4662.5	9152.5	11951	12855	9408	6423.06	10069.3	9763.46	8825.64	5562.83	1	1.56767	1.52006	1.37406	0.866072	1.30423	2.27533	2.75285	2.82401	2.79801	1	1.74458	2.11071	2.16527	2.14533	2818.63	2090.86	2160.12	1861.39	2544.81	10.1866	11.3361
b0730	mngr, eck0718, farr, jw0719, ybgb	dna-binding transcriptional dual regulator, fatty-acyl-binding	0.066	0.11	0.253	0.328	0.418	0.0923514	0.121184	0.220629	0.232473	0.245435	1	1.3122	2.38901	2.51726	2.65762
b0731	mnga, eck0719, hrsa, jw0720	fused 2-o-a-mannosyl-d-glycerate specific pts enzymes: iia	0.019	0.018	0.022	0.039	0.044	0.0257869	0.0193767	0.0192062	0.0273641	0.0258352
b0732	mngb, eck0720, jw0721	alpha-mannosidase	0.046	0.083	0.099	0.157	0.214	0.0638965	0.0914968	0.0864403	0.11127	0.125947	1	1.43195	1.35282	1.74141	1.9711
b0733	cyda, eck0721, jw0722	cytochrome d terminal oxidase, subunit i (ec:1,9,3,-)	0.797	1.062	1.587	2.014	2.84	1.10951	1.17134	1.38579	1.42549	1.6678	1	1.05572	1.249	1.28479	1.50318	891.5	1164	1389	1176	1171.5	1228.13	1280.59	1134.75	807.386	692.693	1	1.04272	0.923969	0.657411	0.564023	8.47853	15.3505	20.3821	23.2368	26.5229	1	1.81052	2.40396	2.74066	3.12824	1106.91	1093.27	818.852	566.39	415.333	346.331	601.351
b0734	cydb, eck0722, jw0723	cytochrome d terminal oxidase, subunit ii (ec:1,9,3,-)	0.981	1.409	1.607	2.047	3.343	1.36642	1.55402	1.40307	1.44835	1.96312	1	1.13729	1.02683	1.05996	1.43669	485.5	634	682.5	579.5	543.5	668.825	697.504	557.573	397.857	321.365	1	1.04288	0.833662	0.594861	0.480492	8.47853	15.3505	20.3821	23.2368	26.5229	1	1.81052	2.40396	2.74066	3.12824	489.472	448.839	397.394	274.698	163.701	635.951	1104.06
b0735	ybge, eck0724, jw0725	conserved inner membrane protein	0.244	0.523	0.619	0.695	1.008	0.339934	0.576718	0.540869	0.492003	0.591702	1	1.69656	1.5911	1.44735	1.74064
b0736	ybgc, eck0725, jw0726	predicted acyl-coa thioesterase	0.205	0.148	0.563	0.81	1.016	0.285962	0.162638	0.491746	0.572904	0.596363	1	0.56874	1.71962	2.00343	2.08546
b0737	tolq, eck0726, fii, jw0727, tolp	membrane spanning protein in tola-tolq-tolr complex	0.16	0.19	0.439	0.615	1.127	0.222574	0.209001	0.383359	0.43547	0.662027	1	0.939018	1.72239	1.95652	2.97441	99	156	184	217	313	136.382	171.626	150.32	148.982	185.073	1	1.25842	1.1022	1.09238	1.35701											612.751	821.171	392.114	342.117	279.555
b0738	tolr, eck0727, jw0728	membrane spanning protein in tola-tolq-tolr complex	0.179	0.303	0.488	0.71	1.266	0.24983	0.3346	0.426167	0.502829	0.743118	1	1.33931	1.70583	2.01269	2.9745
b0739	tola, cim, eck0728, excc, jw0729, lky	membrane anchored protein in tola-tolq-tolr complex	0.302	0.632	0.723	1.02	2.006	0.421192	0.696422	0.630874	0.721769	1.17766	1	1.65346	1.49783	1.71364	2.79601
b0740	tolb, eck0729, jw5100	periplasmic protein	0.783	1.479	2.36	3.567	4.852	1.09092	1.63104	2.06057	2.52409	2.84905	1	1.4951	1.88883	2.31372	2.6116	1745.5	2148.5	2812	3060.5	4243	2404.6	2363.7	2297.28	2101.19	2508.83	1	0.982992	0.95537	0.873823	1.04335											2204.19	1449.2	1114.88	832.457	880.584
b0741	pal, eck0730, excc, jw0731	peptidoglycan-associated outer membrane lipoprotein	1.258	2.973	4.407	6.452	9.012	1.75202	3.27852	3.84783	4.56609	5.29156	1	1.87128	2.19622	2.60619	3.02026	67	86.5	124.5	149	181.5	92.2992	95.1642	101.711	102.296	107.319	1	1.03104	1.10197	1.10831	1.16273											52.6816	29.0266	26.4334	22.4035	20.2811
b0742	ybgf, eck0731, jw0732	predicted protein	0.795	1.568	2.171	2.915	4.768	1.10654	1.72892	1.89592	2.06275	2.79954	1	1.56245	1.71337	1.86414	2.52998	514	612.5	870	939	1204	708.086	673.851	710.753	644.673	711.91	1	0.951651	1.00377	0.910444	1.0054											639.907	389.753	374.885	312.53	254.296
b0746	valz, eck0735, jwr0021	trna-val	5.824	2.176	7.87	11.327	9.35	8.10938	2.3991	6.87159	8.01615	5.48998	1	0.295842	0.847364	0.988504	0.676992																0.0397166	0.075558	0.111104	0.1428	0.17089	1	1.90243	2.79742	3.59547	4.30272
b0749	lysq, eck0738, jwr0024	trna-lys	3.974	1.929	7.699	12.501	12.606	5.53374	2.12681	6.72176	8.84708	7.40179	1	0.384334	1.21469	1.59875	1.33757																0.0337399	0.0649152	0.0966518	0.125776	0.151825	1	1.92399	2.86462	3.72782	4.49987
b0750	nada, eck0739, jw0733, nica	quinolinate synthase, subunit a	0.344	0.329	0.919	1.305	1.564	0.47936	0.362315	0.802108	0.923864	0.918227	1	0.755831	1.67329	1.92729	1.91553	137	210	256	280	360	188.731	231.034	209.141	192.235	212.863	1	1.22415	1.10814	1.01856	1.12787											393.715	637.662	260.739	208.077	231.82
b0751	pnuc, eck0740, jw0734	predicted nicotinamide mononucleotide transporter	0.502	0.79	1.189	1.612	2.205	0.699207	0.870592	1.03783	1.141	1.29499	1	1.24511	1.4843	1.63185	1.85209
b0752	zitb, eck0741, jw0735, ybgr	zinc efflux system	0.086	0.133	0.228	0.297	0.362	0.119728	0.146448	0.199496	0.209917	0.212419	1	1.22317	1.66625	1.75329	1.77419
b0753	ybgs, eck0742, jw0736	conserved protein	0.164	0.207	0.473	0.52	0.549	0.228602	0.228628	0.412715	0.367804	0.322219	1	1.00011	1.80539	1.60893	1.40952	2257.5					3109.93																				13604.1
b0754	arog, eck0743, jw0737	3-deoxy-d-arabino-heptulosonate-7-phosphate synthase, phenylalanine	0.221	0.505	1.356	2.253	4.506	0.307819	0.556597	1.18355	1.59481	2.6456	1	1.8082	3.84495	5.181	8.59466	963	1710	2622	4562	6275	1326.63	1881.28	2142.06	3132.05	3710.33	1	1.41809	1.61467	2.36091	2.79681	0.0460924	0.0864864	0.125197	0.158352	0.187341	1	1.87637	2.71621	3.43553	4.06447	4309.77	3379.97	1809.86	1963.9	1402.45	1.74299	2.30627
b0755	gpma, eck0744, gpm, jw0738	phosphoglyceromutase 1 (ec:5,4,2,1)	1.684	1.838	3.019	3.732	5.884	2.34445	2.02672	2.63602	2.64138	3.45474	1	0.864476	1.12436	1.12665	1.47358	7606.5	8354.5	8588.5	9777.5	10490	10478.7	9191.32	7016.44	6712.77	6202.6	1	0.877142	0.66959	0.64061	0.591924	2.4178	4.61675	6.75633	8.28989	10.2465	1	1.90948	2.79441	3.42869	4.23793	4469.58	4535.07	2661.76	2541.39	1795.39	11.5752	25.1984
b0756	galm, eck0745, jw0739	galactose-1-epimerase (mutarotase) (ec:5,1,3,3)	0.46	0.579	1.126	1.714	1.899	0.640316	0.638284	0.983221	1.21318	1.11522	1	0.996827	1.53552	1.89465	1.74167	626.5	759.5	923	1134	1219	863.066	835.575	754.052	778.551	720.779	1	0.968147	0.873689	0.902076	0.835138											1347.88	1309.09	766.92	641.746	646.311
b0757																		235.5	247	276	244	199	324.425	271.741	225.48	167.519	117.666	1	0.837607	0.695016	0.516357	0.362692
b0759	gale, eck0748, gald, jw0742	udp-galactose-4-epimerase (ec:5,1,3,2)	0.213	0.375	0.578	0.787	1.259	0.296425	0.413586	0.504647	0.556664	0.739533	1	1.39525	1.70244	1.87793	2.49484	464.5	560.5	589	654.5	661	639.895	616.642	481.188	449.349	390.841	1	0.963661	0.751979	0.702223	0.610789											2158.71	1490.96	953.514	807.217	528.497
b0760	modf, chld, eck0749, jw0743, phra	fused molybdate transporter subunits of abc superfamily: atp-binding	0.11	0.133	0.339	0.453	0.56	0.15289	0.146941	0.296367	0.320889	0.328678	1	0.96109	1.93843	2.09883	2.14977	35.5	55.5	73	81	104	48.9048	61.0591	59.6379	55.6108	61.4939	1	1.24853	1.21947	1.13712	1.25742											319.869	415.535	201.23	173.302	187.095
b0761	mode, chld, eck0750, jw0744, modr	dna-binding transcriptional dual regulator	0.679	0.769	1.114	1.518	2.199	0.944869	0.847536	0.972247	1.07424	1.29104	1	0.896988	1.02898	1.13692	1.36637
b0762	ybht, eck0751, jw5102	predicted protein	0.159	0.233	0.463	0.569	0.824	0.220745	0.256836	0.404623	0.402837	0.483872	1	1.16349	1.83299	1.8249	2.19199
b0763	moda, eck0752, jw0746	molybdate transporter subunit	0.222	0.529	0.626	0.767	0.688	0.308839	0.582848	0.54636	0.542527	0.404031	1	1.88722	1.76908	1.75666	1.30822	639.5	894	1414	1317.5	1077	880.975	983.547	1155.18	904.533	636.816	1	1.11643	1.31125	1.02674	0.722854											2852.54	1687.48	2114.31	1667.26	1576.16
b0764	modb, chlj, eck0753, jw0747	molybdate transporter subunit	0.151	0.331	0.373	0.432	0.397	0.2101	0.364523	0.326003	0.305552	0.232872	1	1.73499	1.55166	1.45432	1.10839
b0765	modc, chld, eck0754, jw0748, nard	molybdate transporter subunit (ec:3,6,3,29)	0.106	0.178	0.258	0.294	0.313	0.147583	0.19649	0.225568	0.208113	0.184076	1	1.33139	1.52842	1.41015	1.24727	56		49			77.1456		40.0309			1		0.518901													522.728		177.467
b0766	ybha, eck0755, jw0749, modd	predicted hydrolase	0.221	0.241	0.471	0.742	0.918	0.30776	0.265667	0.41162	0.525385	0.538955	1	0.863228	1.33747	1.70713	1.75122																14.2372	25.1328	32.2634	35.1086	39.7736	1	1.76529	2.26613	2.46598	2.79363
b0767	pgl, blu, eck0756, jw0750, ybhe	6-phosphogluconolactonase (ec:3,1,1,31)	0.467	0.507	1.011	1.477	1.889	0.650002	0.559541	0.882514	1.04506	1.10948	1	0.86083	1.35771	1.60778	1.70689	1988.5	1703.5	2077.5	2287.5	2319.5	2739.36	1874.13	1697.23	1570.49	1371.49	1	0.68415	0.619572	0.573306	0.500662	0.195283	0.49836	1.0544	1.73579	2.4166	1	2.55198	5.39935	8.88855	12.3748	4214.38	3349.4	1923.17	1502.78	1236.15	3.57629	13.3401
b0768	ybhd, eck0757, jw5896	predicted dna-binding transcriptional regulator	0.018	0.028	0.049	0.061	0.089	0.0244664	0.0306657	0.0425369	0.0430084	0.0520257
b0769	ybhh, eck0758, jw0752	conserved protein	0.011	0.016	0.025	0.031	0.048	0.0154423	0.0181551	0.0216759	0.0216531	0.0283434
b0770	ybhi, eck0759, jw0753	predicted transporter	0.667	0.734	0.867	1.531	2.73	0.928108	0.809018	0.75711	1.08385	1.60286	1	0.871685	0.815756	1.16781	1.72702
b0771	ybhj, eck0760, jw5103	predicted hydratase	0.029	0.034	0.045	0.068	0.114	0.0398799	0.037289	0.038964	0.0478172	0.0670962
b0772	ybhc, eck0761, jw0755	predicted pectinesterase	0.24	0.205	0.808	1.191	1.716	0.334807	0.225927	0.705246	0.842665	1.00757	1	0.674798	2.10643	2.51687	3.00942	52	69.5	94.5	101	132.5	71.6352	76.4614	77.2025	69.3418	78.3456	1	1.06737	1.07772	0.967986	1.09367											213.96	338.434	109.469	82.2887	77.7567
b0773	ybhb, eck0762, jw0756	predicted kinase inhibitor	0.206	0.207	0.463	0.62	0.837	0.286411	0.228628	0.404211	0.438772	0.49159	1	0.798251	1.4113	1.53197	1.71638	365	288.5	290.5	337	226	502.824	317.397	237.326	231.368	133.631	1	0.63123	0.471987	0.460138	0.265761											1755.6	1388.27	587.134	527.308	271.834
b0774	bioa, eck0763, jw0757	7,8-diaminopelargonic acid synthase, plp-dependent (ec:2,6,1,62)	0.117	0.143	0.346	0.505	0.746	0.162725	0.15798	0.301858	0.357573	0.438122	1	0.970836	1.85501	2.1974	2.6924
b0775	biob, eck0764, jw0758	biotin synthase (ec:2,8,1,6)	0.223	0.237	0.769	1.126	1.588	0.310849	0.261744	0.671213	0.796653	0.932221	1	0.842031	2.15929	2.56283	2.99895
b0776	biof, eck0765, jw0759	8-amino-7-oxononanoate synthase (ec:2,3,1,47)	0.076	0.157	0.265	0.392	0.652	0.105906	0.172698	0.231602	0.277277	0.382867	1	1.63068	2.18688	2.61815	3.61518
b0777	bioc, eck0766, jw0760	predicted methltransferase, enzyme of biotin synthesis	0.054	0.139	0.214	0.34	0.529	0.0745119	0.153564	0.186876	0.24089	0.310744	1	2.06094	2.508	3.23291	4.17039
b0778	biod, eck0767, jw0761	dethiobiotin synthetase (ec:6,3,3,3)	0.108	0.28	0.4	0.525	0.736	0.149922	0.30835	0.349054	0.371711	0.432385	1	2.05673	2.32823	2.47936	2.88406	57		136	142	212	78.5232		111.106	97.4905	125.353	1		1.41495	1.24155	1.59638											523.759		318.307	262.275	289.911
b0779	uvrb, dar-1, dar-6, eck0768, jw0762	excinulease of nucleotide excision repair, dna damage recognition	0.213	0.3	0.383	0.51	0.666	0.296935	0.330921	0.334507	0.360885	0.391113	1	1.11446	1.12654	1.21537	1.31717	82	87	96.5	96.5	105.5	112.963	95.7143	78.8364	66.2523	62.3808	1	0.847305	0.697895	0.586495	0.552223											380.431	289.236	235.679	183.583	159.496
b0780	ybhk, eck0769, jw0763	predicted transferase with nad(p)-binding rossmann-fold domain	0.124	0.208	0.295	0.424	0.547	0.173249	0.229607	0.257946	0.300139	0.321143	1	1.3253	1.48887	1.73241	1.85365
b0781	moaa, bisa, chla, eck0770, jw0764, nara	molybdopterin biosynthesis protein a	0.168	0.164	0.445	0.611	0.658	0.234418	0.181279	0.388841	0.432764	0.386452	1	0.773314	1.65875	1.84612	1.64856
b0782	moab, eck0771, jw0765	molybdopterin biosynthesis protein b	0.482	0.428	1.325	1.779	1.611	0.671501	0.472217	1.15665	1.25919	0.946215	1	0.703226	1.72249	1.87519	1.4091	2426.5	3099	3611	3711.5	3983.5	3342.75	3409.41	2950.03	2548.14	2355.39	1	1.01994	0.882518	0.76229	0.704628											4978.02	7220	2550.49	2023.64	2489.28
b0783	moac, eck0772, jw0766	molybdopterin biosynthesis, protein c	0.295	0.337	0.824	1.149	1.313	0.410817	0.371882	0.719241	0.812892	0.771106	1	0.905224	1.75076	1.97872	1.877	202	243	369.5	379.5	402.5	278.275	267.34	301.866	260.547	237.993	1	0.960704	1.08477	0.936292	0.855244											677.369	718.884	419.7	320.518	308.639
b0784	moad, chlm, eck0773, jw0767	molybdopterin synthase, small subunit	0.328	0.42	0.824	1.254	1.638	0.456873	0.463629	0.719512	0.887325	0.961824	1	1.01479	1.57486	1.94217	2.10523	280.5	334	406	510	483	386.417	367.455	331.685	350.142	285.592	1	0.950929	0.85836	0.906125	0.739077											845.787	792.562	460.985	394.604	296.927
b0785	moae, eck0774, jw0768	molybdopterin synthase, large subunit	0.243	0.329	0.645	0.88	1.129	0.337863	0.362808	0.563097	0.622526	0.662749	1	1.07383	1.66664	1.84254	1.96159	226	273.5	397	417.5	533.5	311.337	300.895	324.332	286.636	315.452	1	0.966459	1.04174	0.920659	1.01321											921.489	829.35	575.979	460.44	475.975
b0786	ybhl, eck0775, jw0769	predicted inner membrane protein	0.427	0.675	1.04	1.29	1.305	0.593992	0.744257	0.907763	0.91274	0.766445	1	1.25297	1.52824	1.53662	1.29033
b0787	ybhm, eck0776, jw0770	conserved inner membrane protein	0.076	0.17	0.191	0.292	0.373	0.106235	0.187416	0.166566	0.206904	0.219244	1	1.76417	1.56791	1.94761	2.06377
b0788	ybhn, eck0777, jw0771	conserved inner membrane protein	0.079	0.116	0.166	0.238	0.308	0.109414	0.128293	0.14489	0.168416	0.180847	1	1.17255	1.32424	1.53926	1.65287
b0789	ybho, eck0778, jw0772	cardiolipin synthase 2 (ec:2,7,8,-)	0.08	0.134	0.219	0.268	0.374	0.111872	0.14792	0.190992	0.189464	0.219599	1	1.32222	1.70723	1.69358	1.96295
b0790	ybhp, eck0779, jw0773	predicted dnase	0.102	0.135	0.249	0.343	0.454	0.142185	0.148656	0.217336	0.242397	0.266609	1	1.0455	1.52854	1.70479	1.87508
b0791	ybhq, eck0780, jw0774	predicted inner membrane protein	1.504	1.776	1.686	2.271	3.533	2.09378	1.95877	1.47251	1.60714	2.07435	1	0.93552	0.703276	0.767576	0.990721
b0792	ybhr, eck0781, jw5803	predicted transporter subunit: membrane component of abc superfamily	0.054	0.096	0.115	0.151	0.222	0.0749607	0.105479	0.100707	0.107065	0.130253	1	1.40713	1.34346	1.42829	1.73761
b0793	ybhs, eck0782, jw0777	predicted transporter subunit: membrane component of abc superfamily	0.064	0.123	0.134	0.192	0.299	0.0891743	0.135166	0.117172	0.135936	0.175819	1	1.51575	1.31397	1.52439	1.97164
b0794	ybhf, eck0783, jw5104	fused predicted transporter subunits of abc superfamily: atp-binding	0.106	0.169	0.195	0.303	0.416	0.148122	0.185945	0.170139	0.214429	0.244003	1	1.25534	1.14864	1.44764	1.64731
b0795	ybhg, eck0784, jw0779	predicted membrane fusion protein (mfp) component of efflux pump,	0.136	0.274	0.343	0.491	0.527	0.189501	0.302463	0.299108	0.347351	0.309667	1	1.5961	1.5784	1.83298	1.63412
b0796	ybih, eck0785, jw0780	predicted dna-binding transcriptional regulator	0.05	0.078	0.157	0.207	0.284	0.0702238	0.0863454	0.13721	0.146456	0.166497	1	1.22957	1.95389	2.08556	2.37095
b0797	rhle, eck0786, jw0781	rna helicase	0.039	0.046	0.149	0.251	0.958	0.0548121	0.0507784	0.130344	0.177736	0.562637	1		2.37801	3.24263	10.2648
b0798	ybia, eck0787, jw0783	conserved protein	0.04	0.109	0.094	0.13	0.203	0.0561911	0.120198	0.0817725	0.0917278	0.119488	1	2.13909		1.63243	2.12646
b0799	ding, eck0788, jw0784, rarb	atp-dependent dna helicase	0.077	0.171	0.149	0.236	0.326	0.106984	0.188888	0.1298	0.167207	0.191256	1	1.76557	1.21327	1.56291	1.7877
b0800	ybib, eck0789, jw0785	predicted transferase/phosphorylase	1.077	1.517	1.654	2.379	3.569	1.49997	1.6725	1.44452	1.68353	2.09553	1	1.11502	0.96303	1.12237	1.39705	735.5	964	1419	1504	1780	1013.22	1060.56	1159.26	1032.58	1052.49	1	1.04672	1.14413	1.0191	1.03875											675.496	634.115	802.527	613.341	502.256
b0801	ybic, eck0790, jw0786	predicted dehydrogenase	0.338	0.748	1.373	2.042	2.578	0.470485	0.825208	1.19919	1.44534	1.51351	1	1.75395	2.54884	3.07203	3.21692	562.5	1011	1675	2030	2565	774.9	1112.27	1368.4	1393.7	1516.65	1	1.43537	1.76591	1.79856	1.95722											1647.02	1347.86	1141.11	964.271	1002.07
b0802	ybij, eck0791, jw0787	predicted protein	0.085	0.122	0.264	0.36	0.64	0.118618	0.134916	0.230779	0.254721	0.375687	1	1.1374	1.94557	2.14741	3.16721
b0803	ybii, eck0792, jw0788	conserved protein	0.094	0.177	0.168	0.206	0.24	0.131003	0.195261	0.146265	0.14586	0.141017	1	1.49052	1.11651	1.11342	1.07645
b0804	ybix, eck0793, jw5105	conserved protein	0.04	0.069	0.104	0.128	0.17	0.056371	0.0762927	0.0911081	0.0908256	0.0997562	1	1.3534	1.61622	1.61121
b0805	fiu, eck0794, jw0790, ybil	predicted iron outer membrane transporter	0.049	0.132	0.232	0.34	0.454	0.0682754	0.145712	0.202517	0.240593	0.266609	1	2.13418	2.96618	3.52386	3.9049
b0806	mcba, eck0795, jw5106, ybim	predicted protein	0.249	0.199	0.193	0.249	0.365	0.34722	0.219797	0.168764	0.176229	0.214217	1	0.63302	0.486045	0.507543	0.61695
b0807	rlmf, eck0796, jw5107, ybin	23s rrna ma1618 methyltransferase, sam-dependent	0.091	0.073	0.239	0.349	0.543	0.127135	0.0799723	0.209103	0.246908	0.318634	1	0.629037	1.64474	1.9421	2.50628
b0808	ybio, eck0797, jw5108	predicted mechanosensitive channel	0.084	0.076	0.084	0.105	0.139	0.117239	0.0841376	0.0729968	0.0745858	0.0818115	1	0.71766
b0809	glnq, eck0798, jw0794	glutamine transporter subunit	0.629	1	1.403	1.43	1.564	0.875665	1.10241	1.22525	1.01168	0.918582	1	1.25894	1.39923	1.15532	1.04901	1069	1327.5	1449	1657	1288	1472.65	1460.47	1183.77	1137.62	761.578	1	0.991725	0.803835	0.772495	0.517147											1681.75	1324.8	966.143	1124.49	829.08
b0810	glnp, eck0799, jw0795	glutamine transporter subunit	0.808	1.259	1.558	1.732	1.719	1.12471	1.38794	1.36027	1.22581	1.00937	1	1.23404	1.20943	1.08988	0.897447
b0811	glnh, eck0800, jw0796	glutamine transporter subunit	3.043	3.863	4.17	5.061	4.729	4.23752	4.25901	3.64092	3.58148	2.77656	1	1.00507	0.859211	0.845184	0.655234	8894	13178	16723	13234	9106	12252.4	14498	13662	9085.84	5384.26	1	1.18328	1.11505	0.741558	0.439447											2891.4	3404.07	3752.34	2536.89	1939.18
b0812	dps, eck0801, jw0797, pexb, vtm	fe-binding and storage protein	2.34	2.984	3.843	5.124	6.247	3.25796	3.29005	3.3558	3.62659	3.66788	1	1.00985	1.03003	1.11315	1.12582	5677	7967.5	12108.5	12621	9826	7820.63	8765.56	9892.13	8664.98	5809.99	1	1.12082	1.26488	1.10796	0.742905											2400.47	2664.26	2947.77	2389.29	1584.02
b0813	rhta, eck0802, jw0798, ybif	threonine and homoserine efflux system	0.028	0.034	0.079	0.115	0.159	0.0386808	0.037289	0.0686007	0.081199	0.0932974
b0814	ompx, eck0803, jw0799, ybig	outer membrane protein	0.434	0.706	1.457	2.214	5.976	0.604217	0.778359	1.27218	1.56654	3.50893	1	1.28821	2.1055	2.59267	5.8074
b0815	ybip, eck0804, jw0800	predicted hydrolase, inner membrane	0.105	0.203	0.243	0.394	0.672	0.146114	0.223719	0.211845	0.279081	0.394708	1	1.53113	1.44986	1.91003	2.70138
b0816	ylil, eck0805, jw5969	predicted protein	0.016	0.039	0.053	0.072	0.101	0.0220691	0.0431764	0.0461015	0.0508216	0.0592057
b0817	mntr, eck0807, jw0801, ybiq	dna-binding transcriptional regulator of mnth	0.224	0.259	0.536	0.764	1.093	0.31124	0.285779	0.468152	0.540425	0.64193	1	0.918196	1.50415	1.73636	2.06249
b0818	ybir, eck0808, jw0802	predicted transporter	0.111	0.192	0.236	0.338	0.465	0.154631	0.211702	0.206082	0.239086	0.273067	1	1.36908	1.33274	1.54618	1.76594
b0819	ybis, eck0809, jw0803	l,d-transpeptidase linking lpp to murein	0.444	0.279	1.284	1.809	3.288	0.617618	0.307857	1.1207	1.28054	1.93046	1	0.498458	1.81456	2.07335	3.12566	1199	1522	2192.5	2642.5	3868.5	1651.74	1674.45	1791.18	1814.22	2287.39	1	1.01375	1.08442	1.09837	1.38484											2674.37	5439.05	1598.26	1416.76	1184.9
b0820	ybit, eck0810, jw0804	fused predicted transporter subunits of abc superfamily: atp-binding	0.271	0.308	0.762	1.146	1.793	0.376784	0.339752	0.664907	0.811088	1.05279	1	0.901716	1.76469	2.15266	2.79414	146.5	257	291.5	339	464.5	201.818	282.742	238.143	232.741	274.653	1	1.40097	1.17999	1.15322	1.36089											535.635	832.203	358.16	286.95	260.882
b0821	ybiu, eck0811, jw0805	predicted protein	0.038	0.061	0.131	0.197	0.331	0.0525624	0.0669686	0.114159	0.139238	0.194485
b0822	ybiv, eck0812, jw0806, suph	predicted hydrolase	0.057	0.062	0.307	0.461	0.828	0.0788296	0.0681976	0.268376	0.3266	0.486208	1		3.40451	4.14312	6.16783
b0823	ybiw, eck0813, jw0807, pflf	predicted pyruvate formate lyase	0.039	0.053	0.072	0.085	0.136	0.0543012	0.0581376	0.062838	0.0604482	0.0800138
b0824	ybiy, eck0814, jw0808, pfle	predicted pyruvate formate lyase activating enzyme	0.016	0.012	0.019	0.024	0.035	0.0217093	0.0132465	0.0161931	0.0168443	0.0204529
b0825	fsaa, eck0815, jw5109, mipb, ybiz	fructose-6-phosphate aldolase 1 (ec:4,1,2,-)	0.039	0.041	0.107	0.164	0.218	0.0545423	0.045627	0.0930262	0.116088	0.127744	1		1.70558	2.1284	2.34212
b0826	moeb, chln, eck0816, jw0810	molybdopterin synthase sulfurylase	0.052	0.119	0.2	0.258	0.359	0.0730726	0.130994	0.174255	0.182544	0.210988	1	1.79265	2.38469	2.49812	2.88737
b0827	moea, bisb, chle, eck0817, jw0811, nare	molybdopterin biosynthesis protein	0.146	0.173	0.37	0.514	0.683	0.203505	0.190603	0.32271	0.363889	0.401167	1	0.936602	1.58576	1.78811	1.97129	192.5	214.5	308	335.5	386	265.188	235.985	251.623	230.338	228.237	1	0.889879	0.948847	0.868586	0.860661											1303.1	1238.1	779.717	632.991	568.932
b0828	iaaa, eck0818, jw0812, spt, ybik	l-asparaginase (ec:3,5,1,1)	0.679	0.808	1.422	2.01	2.315	0.945738	0.891198	1.24145	1.42279	1.35922	1	0.942331	1.31268	1.50442	1.43721
b0829	gsia, eck0819, jw5897, ylia	fused predicted peptide transport subunits of abc superfamily:	0.332	1.026	0.728	1.136	1.669	0.46251	1.13184	0.63527	0.80387	0.979941	1	2.44718	1.37353	1.73806	2.11875
b0830	gsib, eck0820, jw5111, ylib	predicted peptide transporter subunit: periplasmic-binding component	0.148	0.581	0.415	0.61	0.742	0.206052	0.640742	0.362778	0.431861	0.435969	1	3.10961	1.76061	2.09588	2.11582	603.5	649	854.5	842.5	981	831.381	714.007	698.09	578.421	580.053	1	0.85882	0.839675	0.695735	0.697698											4034.81	1114.34	1924.29	1339.37	1330.49
b0831	gsic, eck0821, jw0815, ylic	predicted peptide transporter subunit: membrane component of abc	0.112	0.288	0.32	0.434	0.616	0.155619	0.317674	0.27935	0.30705	0.361693	1	2.04136	1.79509	1.97308	2.32422
b0832	gsid, eck0822, jw0816, ylid	predicted peptide transporter subunit: membrane component of abc	0.106	0.193	0.232	0.331	0.436	0.147132	0.212681	0.202517	0.23397	0.256199	1	1.44551	1.37643	1.59021	1.74129
b0833	ylie, eck0823, jw0817	conserved inner membrane protein	0.027	0.057	0.065	0.125	0.175	0.0374808	0.063289	0.0568036	0.088119	0.10262
b0834	ylif, eck0824, jw0818	predicted diguanylate cyclase	0.024	0.058	0.064	0.152	0.251	0.0335211	0.0642678	0.056252	0.107661	0.147476
b0835	rimo, eck0825, jw0819, ylig	predicted sam-dependent methyltransferase	0.125	0.071	0.4	0.585	1.147	0.174599	0.0787433	0.349606	0.413817	0.673513	1	0.450995	2.00233	2.3701	3.85748
b0836	bssr, eck0826, jw0820, ylih	conserved protein	0.54	0.248	0.2	0.187	0.398	0.752549	0.273026	0.174527	0.132625	0.233593	1	0.362802	0.231915	0.176234	0.310403
b0837	ylii, eck0827, jw0821	predicted dehydrogenase	0.108	0.135	0.187	0.253	0.321	0.150972	0.148656	0.163553	0.179242	0.188737	1	0.984656	1.08333	1.18725	1.25014
b0838	ylij, eck0828, jw0822	predicted glutathione s-transferase	0.475	0.607	1.22	1.385	1.679	0.660887	0.669443	1.065	0.980406	0.986044	1	1.01295	1.61147	1.48347	1.492	1421.5	1606	1906	2147.5	1965	1958.26	1766.86	1557.12	1474.37	1161.88	1	0.902263	0.795156	0.7529	0.593323											2963.07	2639.3	1462.08	1503.84	1178.32
b0839	dacc, eck0829, jw0823	d-alanyl-d-alanine carboxypeptidase (penicillin-binding protein 6a)	0.289	0.392	0.648	0.797	0.847	0.402661	0.43272	0.565566	0.563882	0.497328	1	1.07465	1.40457	1.40039	1.2351	1289.5	1250	1541.5	1483.5	1560	1776.41	1375.21	1259.34	1018.5	922.408	1	0.774147	0.708922	0.573347	0.519253											4411.68	3178.05	2226.69	1806.23	1854.73
b0840	deor, eck0830, jw0824, nucr	dna-binding transcriptional repressor	0.406	0.503	0.689	1.007	1.574	0.565026	0.55464	0.601237	0.712747	0.92433	1	0.981618	1.06409	1.26144	1.63591
b0841	ybjg, bcrc, eck0831, jw5112	undecaprenyl pyrophosphate phosphatase	0.083	0.066	0.22	0.285	0.343	0.11571	0.0726131	0.192367	0.201491	0.201655	1		1.66248	1.74134	1.74275
b0842	cmr, cmla, eck0832, jw0826, mdfa	multidrug efflux system protein	0.093	0.089	0.185	0.247	0.395	0.129143	0.0981201	0.161355	0.175029	0.231796	1	0.759777	1.24943	1.35531	1.79487
b0843	ybjh, eck0833, jw0827	predicted protein	0.07	0.104	0.136	0.199	0.258	0.0968491	0.11456	0.118547	0.141043	0.151427	1	1.18288	1.22404	1.45631	1.56353
b0844	ybji, eck0834, jw5113	conserved protein	0.312	0.48	0.613	0.929	1.037	0.434235	0.528883	0.534835	0.657414	0.608925	1	1.21796	1.23167	1.51396	1.40229
b0845	ybjj, eck0835, jw0829	predicted transporter	0.278	0.455	0.598	0.974	1.203	0.38749	0.501654	0.522486	0.689289	0.706518	1	1.29462	1.34839	1.77886	1.82332
b0846	ybjk, eck0836, jw5114	predicted dna-binding transcriptional regulator	0.035	0.077	0.109	0.143	0.254	0.0480953	0.0846307	0.0949444	0.101048	0.149274
b0847	ybjl, eck0838, jw0831	predicted transporter	0.102	0.127	0.18	0.222	0.373	0.141526	0.140067	0.157239	0.157282	0.219244	1	0.989693	1.11102	1.11133	1.54914
b0848	ybjm, eck0839, jw0832	predicted inner membrane protein	0.042	0.051	0.106	0.136	0.152	0.05835	0.055687	0.0927545	0.0959321	0.0893468	1		1.58962	1.64408
b0849	grxa, eck0840, grx, jw0833	glutaredoxin 1, redox coenzyme for ribonucleotide reductase (rnr1a)	0.033	0.089	0.161	0.244	0.356	0.0461469	0.0986131	0.140223	0.172927	0.20919
b0850	ybjc, eck0841, jw0834	predicted inner membrane protein	0.445	0.605	0.795	1.177	1.821	0.620228	0.666742	0.693992	0.833039	1.06929	1	1.075	1.11893	1.34312	1.72402
b0851	nfsa, eck0842, jw0835, mda18, mdaa, snra, ybjb	nitroreductase a, nadph-dependent, fmn-dependent (ec:1,-,-,-)	0.227	0.237	0.637	0.895	0.98	0.316456	0.261494	0.555959	0.633352	0.575555	1	0.826322	1.75683	2.00139	1.81875	108	135	155	199	207	148.781	148.522	126.628	136.624	122.396	1	0.998262	0.851107	0.918291	0.822663											470.147	567.975	227.766	215.716	212.658
b0852	rimk, eck0843, jw0836, nek	ribosomal protein s6 modification protein	0.078	0.12	0.245	0.34	0.474	0.108933	0.132708	0.214043	0.24089	0.278084	1	1.21825	1.96489	2.21136	2.55279
b0853	ybjn, eck0844, jw0837	predicted oxidoreductase	0.153	0.201	0.378	0.511	0.727	0.21247	0.221269	0.330391	0.361787	0.426636	1	1.04141	1.555	1.70277	2.00799
b0854	potf, eck0845, jw0838	putrescine transporter subunit: periplasmic-binding component of abc	0.803	0.901	1.23	1.471	1.662	1.11869	0.993733	1.07433	1.04115	0.975635	1	0.888302	0.960347	0.930689	0.872123	4083.5	3360	3253	3059.5	2873.5	5625.43	3696.55	2657.56	2100.51	1699.06	1	0.657115	0.47242	0.373395	0.302033											5028.59	3719.86	2473.69	2017.49	1741.5
b0855	potg, eck0846, jw5818	putrescine transporter subunit: atp-binding component of abc	0.265	0.401	0.481	0.666	0.917	0.368329	0.442044	0.419853	0.471559	0.538234	1	1.20014	1.13989	1.28027	1.46129	144	175	170	164		198.374	192.529	138.883	112.595		1	0.970532	0.700104	0.567587												538.579	435.542	330.789	238.771
b0856	poth, eck0847, jw0840	putrescine transporter subunit: membrane component of abc	0.119	0.202	0.251	0.303	0.481	0.165904	0.223226	0.219254	0.214122	0.28239	1	1.34551	1.32157	1.29063	1.70212
b0857	poti, eck0848, jw0841	putrescine transporter subunit: membrane component of abc	0.14	0.24	0.254	0.332	0.455	0.194538	0.264438	0.222003	0.235179	0.267319	1	1.35931	1.14118	1.20891	1.37412
b0858	ybjo, eck0849, jw0842	predicted inner membrane protein	0.055	0.067	0.156	0.205	0.235	0.0767598	0.0743278	0.136106	0.144958	0.138143	1	0.968317	1.77315	1.88847	1.79968
b0859	rumb, eck0850, jw0843, ybjf	23s rrna m(5)u747 methyltransferase (ec:2,1,1,-)	0.129	0.137	0.219	0.319	0.47	0.179487	0.150621	0.191264	0.225851	0.275931	1	0.839171	1.06561	1.25831	1.53733
b0860	artj, eck0851, jw0844	arginine transporter subunit	0.321	0.596	1.68	2.568	5.004	0.447278	0.657418	1.46674	1.81735	2.93803	1	1.46982	3.27926	4.06313	6.5687	1485	2674	5137	5473.5	12005	2045.74	2941.84	4196.71	3757.85	7098.4	1	1.43804	2.05144	1.83692	3.46985											4573.74	4474.84	2861.24	2067.76	2416.04
b0861	artm, eck0852, jw0845	arginine transporter subunit	0.175	0.328	0.431	0.641	1.032	0.243444	0.361336	0.376221	0.453515	0.605696	1	1.48427	1.54541	1.86291	2.48803
b0862	artq, eck0853, jw0846	arginine transporter subunit	0.383	0.475	0.773	1.108	1.769	0.533004	0.523238	0.675057	0.784319	1.03844	1	0.981679	1.26652	1.47151	1.94827
b0863	arti, eck0854, jw0847	arginine transporter subunit	0.675	0.713	1.64	2.111	3.182	0.939261	0.786697	1.43217	1.49406	1.86839	1	0.83757	1.52478	1.59068	1.98921	2420	2476	3665.5	4676.5	4641	3333.79	2724.01	2994.56	3210.66	2744.16	1	0.81709	0.898244	0.963067	0.823136											3549.38	3462.59	2090.93	2148.95	1468.73
b0864	artp, eck0855, jw0848	arginine transporter subunit	0.402	0.308	0.92	1.28	1.874	0.559509	0.339752	0.803483	0.906118	1.1005	1	0.607232	1.43605	1.61949	1.96691	247		295.5	306	411	340.267		241.411	210.085	243.019	1		0.709475	0.617413	0.714201											608.153		300.455	231.852	220.825
b0865	ybjp, eck0856, jw0849	predicted lipoprotein	0.419	0.464	0.962	1.277	1.445	0.583677	0.511706	0.840257	0.904016	0.848256	1	0.876695	1.43959	1.54883	1.4533	332.5	302	353.5	348	306.5	458.052	332.25	288.794	238.92	181.23	1	0.725354	0.630484	0.521601	0.395653											784.769	649.297	343.698	264.288	213.649
b0866	ybjq, eck0857, jw0850	conserved protein	0.352	0.537	0.784	0.92	1.12	0.489465	0.592047	0.684385	0.651099	0.657722	1	1.20958	1.39823	1.33022	1.34376
b0867	amid, eck0858, jw0851, ybjr	predicted amidase and lipoprotein	0.234	0.381	0.49	0.614	0.734	0.325839	0.419967	0.427814	0.434866	0.430942	1	1.28888	1.31296	1.3346	1.32256
b0868	ybjs, eck0859, jw5819	predicted nad(p)h-binding oxidoreductase with nad(p)-binding	0.262	0.259	0.509	0.693	0.871	0.36476	0.285779	0.443998	0.490198	0.511322	1	0.783471	1.21723	1.34389	1.4018
b0869	ybjt, eck0860, jw5116	conserved protein with nad(p)-binding rossmann-fold domain	0.17	0.313	0.317	0.44	0.683	0.236187	0.345389	0.27716	0.311561	0.400801	1	1.46236	1.17348	1.31913	1.69697
b0870	ltae, eck0861, jw0854, ltaa, ybju	l-allo-threonine aldolase, plp-dependent (ec:4,1,2,5)	0.252	0.345	0.578	0.805	1.081	0.350667	0.38047	0.504647	0.5699	0.634761	1	1.08499	1.4391	1.62519	1.81015	374	575.5	830	836	1011.5	515.222	633.144	678.075	573.958	598.087	1	1.22888	1.31608	1.114	1.16083											1469.26	1664.11	1343.66	1007.12	942.225
b0871	poxb, eck0862, jw0855	pyruvate dehydrogenase (pyruvate oxidase), thiamin-dependent,	0.515	0.574	0.789	1.057	1.495	0.716868	0.632647	0.688501	0.747933	0.877676	1	0.882516	0.960429	1.04333	1.22432	1774.5	1557.5	1655	1560	1365	2444.55	1713.51	1352.06	1071.02	807.107	1	0.700949	0.553093	0.438127	0.330166											3410.04	2708.47	1963.78	1431.98	919.595
b0872	hcr, eck0863, jw5117, ybjv	hcp oxidoreductase, nadh-dependent (ec:1,-,-,-)	0.076	0.079	0.093	0.144	0.207	0.105755	0.0868384	0.0809493	0.101652	0.121286	1	0.821126		0.961201	1.14685
b0873	hcp, eck0864, jw0857, ybjw	hybrid-cluster	0.025	0.037	0.056	0.076	0.11	0.034542	0.0407184	0.0485712	0.0541327	0.064588
b0874	ybje, eck0865, jw0858	predicted transporter	0.109	0.142	0.258	0.375	0.672	0.151182	0.156258	0.225016	0.26525	0.394708	1	1.03357	1.48838	1.75451	2.61082
b0875	aqpz, bnip, eck0866, jw0859	aquaporin	0.122	0.148	0.177	0.19	0.185	0.170552	0.162881	0.154498	0.134727	0.108723	1	0.955021	0.905867	0.789947	0.637477
b0876	ybjd, eck0867, jw0860	conserved protein with nucleoside triphosphate hydrolase domain	0.121	0.145	0.213	0.263	0.282	0.168003	0.16043	0.186324	0.186153	0.165421	1	0.954925	1.10905	1.10804	0.98463
b0877	ybjx, eck0868, jw0861	conserved protein	0.146	0.124	0.318	0.465	0.679	0.202935	0.137124	0.277704	0.329009	0.398648	1	0.675704	1.36844	1.62126	1.96442
b0878	maca, eck0869, jw0862, ybjy	macrolide transporter subunit, membrane fusion protein (mfp)	0.125	0.266	0.355	0.415	0.524	0.17403	0.292896	0.30981	0.293516	0.30787	1	1.68302	1.78021	1.68659	1.76906	7					9.6432																				55.4112
b0879	macb, eck0870, jw0863, ybjz	fused macrolide transporter subunits of abc superfamily: atp-binding	0.098	0.215	0.229	0.291	0.384	0.136878	0.237459	0.200319	0.205704	0.225337	1	1.73482	1.46348	1.50283	1.64626
b0880	cspd, csph, eck0871, jw0864, ybja	cold shock protein homolog	8.559	5.143	4.287	3.591	3.005	11.9177	5.67136	3.74328	2.54153	1.76433	1	0.475876	0.314093	0.213256	0.148043	3650.5	3470	2776	2049.5	996	5028.93	3817.57	2267.87	1407.09	588.922	1	0.759122	0.450966	0.279799	0.117107											421.97	673.131	605.853	553.639	333.794
b0881	clps, eck0872, jw0865, ylja	regulatory protein for clpa substrate specificity	0.647	0.998	1.119	1.629	2.417	0.901392	1.10093	0.976915	1.15273	1.41914	1	1.22137	1.08379	1.27883	1.57439
b0882	clpa, eck0873, jw0866, lopd	atpase and specificity subunit of clpa-clpp atp-dependent serine	0.895	1.421	1.704	2.056	2.002	1.24597	1.56726	1.48787	1.45497	1.1755	1	1.25787	1.19414	1.16774	0.943443	639.5	958.5	1562	1813.5	2290	880.975	1054.51	1276.09	1245.06	1354.05	1	1.19698	1.44849	1.41328	1.53699											707.059	672.833	857.662	855.732	1151.89
b0884	infa, bypa1, eck0875, jw0867	translation initiation factor if-1	0.478	0.44	1.662	2.514	4.512	0.666194	0.484728	1.4511	1.77886	2.64954	1	0.727608	2.1782	2.67019	3.97713	1945	2710	3913.5	4842.5	6830	2679.43	2981.44	3197.16	3324.63	4038.49	1	1.11272	1.19322	1.2408	1.50722											4022	6150.76	2203.27	1868.96	1524.22
b0885	aat, eck0876, jw0868, ycaa	leucyl/phenylalanyl-trna-protein transferase (ec:2,3,2,6)	0.112	0.114	0.308	0.421	0.421	0.156519	0.126085	0.2692	0.29773	0.247232	1	0.805559	1.71992	1.9022	1.57957
b0886	cydc, eck0877, jw0869, mdra, mdrh, surb, ycab	fused cysteine transporter subunits of abc superfamily: membrane	0.137	0.317	0.358	0.415	0.614	0.190101	0.349804	0.31256	0.293516	0.360261	1	1.8401	1.64418	1.544	1.89511
b0887	cydd, eck0878, htrd, jw0870	fused cysteine transporter subunits of abc superfamily: membrane	0.088	0.167	0.27	0.359	0.61	0.122247	0.184473	0.235719	0.253819	0.358464	1	1.50901	1.92821	2.07627	2.93228
b0888	trxb, eck0879, jw0871	thioredoxin reductase, fad/nad(p)-binding (ec:1,8,1,9)	0.221	0.192	0.887	1.331	2.097	0.308389	0.211945	0.774118	0.941909	1.23148	1	0.687263	2.5102	3.05428	3.99326	1080	1949	2568	2800.5	4020	1487.81	2144.22	2097.95	1922.69	2376.97	1	1.44119	1.41009	1.2923	1.59764											4824.44	10116.9	2710.11	2041.27	1930.18
b0889	lrp, alsb, eck0880, ihb, jw0872, livr, lrs, lss, lstr, mbf, oppi,	dna-binding transcriptional dual regulator, leucine-binding	1.085	1.534	2.383	2.945	3.566	1.51088	1.69114	2.0806	2.08411	2.09408	1	1.11931	1.37708	1.3794	1.386	4479	5379.5	5913.5	5977.5	7405.5	6170.27	5918.33	4831.08	4103.87	4378.78	1	0.959169	0.782961	0.665104	0.709658											4083.88	3499.61	2321.96	1969.13	2091.02
b0890	ftsk, dinh, eck0881, jw0873	dna-binding membrane protein required for chromosome resolution and	0.245	0.578	0.509	0.813	1.24	0.341671	0.637799	0.443998	0.575313	0.728047	1	1.8667	1.29949	1.68382	2.13084
b0891	lola, eck0882, jw0874, lpla, yzzv	chaperone for lipoproteins	0.249	0.835	0.769	1.109	1.853	0.34707	0.921128	0.671764	0.784924	1.08795	1	2.65401	1.93553	2.26157	3.13468	519	689.5	1141.5	1361	1888	714.974	758.563	932.557	934.398	1116.35	1	1.06097	1.30432	1.3069	1.56139											2060.03	823.516	1388.22	1190.43	1026.1
b0892	rara, eck0883, jw0875, ycaj	recombination protein	0.083	0.222	0.268	0.372	0.648	0.11508	0.244818	0.2338	0.263148	0.380348	1	2.12738	2.03164	2.28665	3.30508
b0893	sers, eck0884, jw0876	seryl-trna synthetase, also charges selenocysteinyl-trna with serine	0.577	0.763	1.511	2.22	3.304	0.802953	0.841398	1.31938	1.57105	1.93979	1	1.04788	1.64316	1.95659	2.41582	1360	1865.5	2666	2947.5	3626.5	1873.54	2052.36	2178.01	2023.61	2144.3	1	1.09545	1.16251	1.0801	1.14452	0.0300346	0.0566244	0.0824166	0.104832	0.124528	1	1.8853	2.74405	3.49037	4.14616	2333.31	2439.22	1650.78	1288.07	1105.43	0.804221	1.3841
b0894	dmsa, eck0885, jw5118	dimethyl sulfoxide reductase, anaerobic, subunit a (ec:1,8,99,-)	0.016	0.044	0.066	0.08	0.137	0.0225783	0.0480776	0.0573552	0.0565416	0.0807351
b0895	dmsb, eck0886, jw0878	dimethyl sulfoxide reductase, anaerobic, subunit b (ec:1,8,99,-)	0.047	0.081	0.095	0.136	0.2	0.0658161	0.0897821	0.0831473	0.0959321	0.11769	1	1.36414	1.26333	1.45758	1.78817
b0896	dmsc, eck0887, jw0879	dimethyl sulfoxide reductase, anaerobic, subunit c (ec:1,8,99,-)	0.067	0.087	0.105	0.147	0.204	0.0938518	0.0961625	0.0919313	0.104359	0.119843	1	1.02462	0.979537	1.11195	1.27694
b0897	ycac, eck0888, jw0880	predicted hydrolase	0.615	0.358	0.717	0.819	0.986	0.855995	0.394452	0.625935	0.579824	0.578784	1	0.460812	0.731236	0.677368	0.676154	4634	4304	2689.5	3506	2740.5	6383.8	4735.11	2197.21	2407.05	1620.42	1	0.741738	0.344185	0.377057	0.253834											7457.75	12004.3	3510.28	4151.35	2799.7
b0898	ycad, eck0889, jw0881	predicted transporter	0.123	0.174	0.231	0.351	0.614	0.171362	0.192318	0.201694	0.248406	0.360617	1	1.12229	1.17701	1.4496	2.10442
b0899	ycam, eck0890, jw5119	predicted transporter	0.079	0.126	0.163	0.235	0.431	0.110432	0.138596	0.142421	0.166007	0.253325	1	1.25503	1.28967	1.50325	2.29395
b0900	ycan, eck0891, jw0883	predicted dna-binding transcriptional regulator	0.019	0.034	0.106	0.131	0.125	0.0259065	0.0375319	0.0924746	0.0929278	0.0731998
b0901	ycak, eck0892, jw0884	conserved protein	0.217	0.57	0.382	0.634	0.568	0.302243	0.628232	0.333413	0.449003	0.333705	1	2.07857	1.10313	1.48557	1.1041
b0902	pfla, act, eck0893, jw0885	pyruvate formate lyase activating enzyme 1 (ec:1,97,1,4)	0.129	0.184	0.401	0.569	0.612	0.179996	0.202621	0.349877	0.402386	0.359185	1	1.12569	1.9438	2.23552	1.99551	238.5	272	319	376.5	429	328.557	299.245	260.609	258.487	253.662	1	0.910783	0.793193	0.786733	0.772048											1825.36	1476.87	744.859	642.386	706.216
b0903	pflb, eck0894, jw0886, pfl	pyruvate formate lyase i (ec:2,3,1,54)	2.508	2.261	2.735	3.51	4.968	3.49198	2.49354	2.38767	2.48409	2.91723	1	0.714074	0.683757	0.711368	0.835406	7998	8195.5	7701.5	7878.5	7770.5	11018	9016.4	6291.8	5409.01	4594.6	1	0.81833	0.571045	0.490923	0.417007											3155.24	3615.91	2635.12	2177.46	1574.99
b0904	foca, eck0895, jw0887, ycae	formate transporter	1.556	1.3	1.868	2.824	3.973	2.16667	1.43381	1.63057	1.9984	2.3327	1	0.661757	0.752567	0.922334	1.07663
b0905	ycao, eck0896, jw0888	conserved protein	0.052	0.079	0.202	0.298	0.647	0.0722028	0.0873315	0.176174	0.211117	0.379638	1	1.20953	2.43998	2.92395	5.25794
b0906	ycap, eck0897, jw0889	conserved inner membrane protein	0.197	0.293	0.296	0.402	0.574	0.274598	0.323311	0.258769	0.284494	0.33729	1	1.1774	0.942358	1.03604	1.2283
b0907	serc, eck0898, jw0890, pdxc, pdxf	3-phosphoserine/phosphohydroxythreonine aminotransferase	0.627	0.531	2.414	3.475	6.251	0.873715	0.585549	2.1075	2.45943	3.6704	1	0.670183	2.41211	2.81491	4.20091	3068	5140	7356	8692.5	13533	4226.48	5654.84	6009.54	5967.86	8001.89	1	1.33796	1.42188	1.41202	1.89328	0.157365	0.298704	0.438123	0.56168	0.670958	1	1.89816	2.78412	3.56928	4.26371	4837.36	9657.34	2851.51	2426.52	2180.11	1.86786	2.64994
b0908	aroa, eck0899, jw0891	5-enolpyruvylshikimate-3-phosphate synthetase (ec:2,5,1,19)	0.354	0.477	1.442	2.295	4.969	0.493244	0.525689	1.25901	1.62398	2.91758	1	1.06578	2.5525	3.29245	5.91509	290	361	547	767	1185	399.504	397.159	446.876	526.586	700.675	1	0.994131	1.11858	1.3181	1.75386	0.0460924	0.0864864	0.125197	0.158352	0.187341	1	1.87637	2.71621	3.43553	4.06447	809.951	755.502	354.943	324.256	240.156	5.78794	10.9244
b0909	ycal, eck0900, jw0892	predicted peptidase with chaperone function	0.02	0.047	0.089	0.12	0.205	0.0272846	0.0522502	0.0776563	0.0851056	0.120564
b0910	cmk, eck0901, jw0893, mssa, ycaf, ycag	cytidylate kinase (ec:2,7,4,14)	0.308	0.273	0.735	1.08	1.556	0.429347	0.301234	0.641856	0.764471	0.913566	1	0.701609	1.49496	1.78054	2.1278	294.5	337	377.5	433	572.5	405.703	370.755	308.401	297.277	338.512	1	0.913859	0.760165	0.732746	0.834383											944.931	1230.79	480.484	388.867	370.539
b0911	rpsa, eck0902, jw0894, ssyf	30s ribosomal subunit protein s1	2.183	3.293	6.038	9.962	15.827	3.03937	3.63127	5.27203	7.05048	9.29314	1	1.19474	1.73458	2.31972	3.05759	6983	8971	14568	18683.5	23245.5	9619.78	9869.57	11901.4	12827.2	13744.8	1	1.02597	1.23718	1.33342	1.4288	0.556233	1.05669	1.55132	1.99067	2.37954	1	1.89972	2.78898	3.57885	4.27796	3165.06	2717.94	2257.47	1819.34	1479.02	2.90073	5.3711
b0912	ihfb, eck0903, himd, hip, jw0895	integration host factor (ihf), dna-binding protein, beta subunit	2.108	2.101	4.197	5.33	7.072	2.93466	2.31618	3.66424	3.77185	4.15229	1	0.789248	1.24861	1.28527	1.41491	6241	6126.5	6943.5	6849.5	7257.5	8597.6	6740.16	5672.54	4702.54	4291.27	1	0.783958	0.659782	0.54696	0.499124											2929.67	2910.03	1548.08	1246.75	1033.47
b0913	ycai, eck0904, jw5120	conserved inner membrane protein	0.016	0.049	0.055	0.06	0.097	0.0225774	0.0537221	0.047748	0.0427017	0.0566975
b0914	msba, eck0905, jw0897	fused lipid transporter subunits of abc superfamily: membrane	0.126	0.235	0.405	0.541	0.925	0.17499	0.259286	0.353994	0.383142	0.543261	1	1.48172	2.02294	2.18951	3.10453	50	62.5	76.5	89	84	68.88	68.7603	62.4972	61.1032	49.6681	1	0.998262	0.907335	0.887097	0.721082											393.623	265.191	176.549	159.479	91.4259
b0915	lpxk, eck0906, jw0898, ycah	lipid a 4'kinase (ec:2,7,1,130)	0.139	0.27	0.289	0.438	0.644	0.19337	0.297804	0.252463	0.310063	0.378195	1	1.54008	1.3056	1.60347	1.95581
b0916	ycaq, eck0907, jw0899	conserved protein	0.054	0.092	0.119	0.164	0.227	0.0747511	0.1018	0.103728	0.116088	0.133127	1	1.36185	1.38765	1.55299	1.78093
b0917	ycar, eck0908, jw0900	conserved protein	0.295	0.369	1.024	1.283	1.408	0.410771	0.407331	0.894039	0.908076	0.826727	1	0.991624	2.17649	2.21066	2.01262	370	471	596	719.5	1031	509.712	518.177	486.907	493.975	609.617	1	1.01661	0.955258	0.969126	1.196											1240.86	1272.13	544.614	543.98	737.386
b0918	kdsb, eck0909, jw0901	3-deoxy-manno-octulosonate cytidylyltransferase (ec:2,7,7,38)	0.192	0.256	0.75	0.988	1.387	0.267551	0.2821	0.654748	0.699511	0.814531	1	1.05438	2.44719	2.6145	3.0444	261.5	355	502	591	767.5	360.242	390.558	410.113	405.753	453.813	1	1.08415	1.13844	1.12633	1.25974											1346.45	1384.47	626.367	580.052	557.147
b0919	ycbj, eck0910, jw0902	conserved protein	0.082	0.132	0.151	0.172	0.22	0.114601	0.145712	0.13227	0.121501	0.129176	1	1.27147	1.15418	1.0602	1.12718
b0920	ycbc, eck0911, jw0903	conserved inner membrane protein	0.059	0.077	0.158	0.19	0.29	0.0824421	0.0846307	0.138304	0.134429	0.170082	1	1.02655	1.67759	1.63059	2.06304
b0921	smta, eck0912, jw0904, ycbd	predicted s-adenosyl-l-methionine-dependent methyltransferase	0.385	0.442	0.724	0.974	1.123	0.535462	0.487671	0.631977	0.689289	0.659519	1	0.910749	1.18025	1.28728	1.23168
b0922	mukf, eck0913, jw0905, kicb	involved in chromosome partioning, ca2+ binding protein	0.219	0.413	0.531	0.791	1.113	0.304551	0.455777	0.463485	0.559669	0.653771	1	1.49655	1.52186	1.83768	2.14667
b0923	muke, eck0914, jw0906, kica, ycba	protein involved in chromosome partitioning	0.319	0.576	0.775	1.008	1.338	0.444041	0.635591	0.676704	0.713045	0.785821	1	1.43138	1.52397	1.60581	1.76971	182.5	223.5	231	273.5	311.5	251.412	245.887	188.717	187.772	184.186	1	0.978023	0.750629	0.746871	0.732606											566.191	386.863	278.877	263.339	234.387
b0924	mukb, eck0915, jw0907	fused chromosome partitioning protein: predicted nucleotide	0.246	0.663	0.575	0.764	1.107	0.342092	0.73101	0.501625	0.541029	0.649831	1	2.13688	1.46635	1.58153	1.89958	66					90.9216																				265.781
b0925	ycbb, eck0916, jw0908	murein l,d-transpeptidase	0.072	0.23	0.324	0.455	0.641	0.100328	0.254135	0.282923	0.322089	0.376408	1	2.53305	2.81999	3.21038	3.75179
b0926	ycbk, eck0917, jw0909	conserved protein	2.533	1.81	2.244	2.738	3.332	3.52677	1.9963	1.95904	1.93765	1.9563	1	0.566044	0.555478	0.549413	0.5547
b0927	ycbl, eck0918, jw0910	predicted metal-binding enzyme	0.7	0.824	1.049	1.387	1.874	0.975093	0.909103	0.916267	0.981904	1.1005	1	0.932324	0.939671	1.00698	1.12862	702	749	755.5	793.5	1017.5	967.075	824.023	617.211	544.78	601.635	1	0.852078	0.638225	0.563327	0.622118											991.777	906.414	673.615	554.82	546.69
b0928	aspc, eck0919, jw0911	aspartate aminotransferase, plp-dependent (ec:2,6,1,1)	0.725	0.959	2.718	3.485	4.472	1.00928	1.05727	2.37313	2.46604	2.62586	1	1.04756	2.35132	2.44338	2.60173	3477	6422.5	9443	8840	9429.5	4789.91	7065.8	7714.53	6069.13	5575.54	1	1.47514	1.61058	1.26706	1.16402	0.144414	0.273714	0.400799	0.51296	0.612024	1	1.89535	2.77536	3.55202	4.238	4745.89	6683.05	3250.78	2461.08	2123.32	1.5125	1.94335
b0929	ompf, cmlb, coa, cry, eck0920, jw0912, tolf	outer membrane porin 1a (ia;b;f)	2.447	7.865	9.457	14.535	14.447	3.408	8.67182	8.25683	10.2867	8.48292	1	2.54455	2.42278	3.0184	2.48912	1827	3442.5	3513.5	3429	1176.5	2516.87	3787.32	2870.38	2354.19	695.649	1	1.50477	1.14045	0.935362	0.276394	1.47247	2.82748	4.1892	5.24371	6.48853	1	1.92023	2.84502	3.56117	4.40657	738.52	436.738	347.637	228.857	82.0059	29.3494	37.4527
b0930	asns, eck0921, jw0913, lcs, tss	asparaginyl trna synthetase (ec:6,1,1,22)	0.168	0.187	0.557	0.748	1.239	0.233788	0.20655	0.486535	0.529598	0.727692	1	0.883496	2.0811	2.2653	3.11262	1710	2619	3671.5	4034.5	5035.5	2355.7	2881.33	2999.46	2769.9	2977.43	1	1.22313	1.27328	1.17583	1.26393	0.0262786	0.0494802	0.0719138	0.091336	0.10838	1	1.88291	2.7366	3.47569	4.12428	10076.2	13949.8	6164.94	5230.19	4091.6	0.559626	0.861497
b0931	pncb, eck0922, jw0914	nicotinate phosphoribosyltransferase (ec:2,4,2,11)	0.516	0.38	1.34	1.756	2.593	0.718546	0.418981	1.16983	1.24264	1.52285	1	0.583095	1.62805	1.72939	2.11935	291.5	434	551.5	576	750.5	401.57	477.471	450.552	395.454	443.761	1	1.18901	1.12198	0.98477	1.10506											558.865	1139.6	385.145	318.237	291.402
b0932	pepn, eck0923, jw0915	aminopeptidase n (ec:3,4,11,2)	0.343	0.698	0.93	1.149	1.384	0.477681	0.769528	0.811987	0.813497	0.812378	1	1.61097	1.69985	1.70301	1.70067	918	1255	1638	1504	1593	1264.64	1380.71	1338.18	1032.58	941.92	1	1.09178	1.05815	0.8165	0.744815											2647.45	1794.22	1648.03	1269.3	1159.46
b0933	ssub, eck0924, jw0916, ycbe	alkanesulfonate transporter subunit	0.054	0.093	0.112	0.171	0.255	0.0753808	0.10205	0.097694	0.120896	0.149629	1	1.35379	1.29601	1.60381	1.98497
b0934	ssuc, eck0925, jw5121, ycbm	alkanesulfonate transporter subunit	0.059	0.09	0.112	0.167	0.271	0.0819762	0.0995919	0.0979657	0.118487	0.158962	1	1.21489	1.19505	1.44539	1.93912
b0935	ssud, eck0926, jw0918, ssi6, ycbn	alkanesulfonate monooxygenase, fmnh(2)-dependent (ec:1,14,14,5)	0.024	0.041	0.062	0.076	0.105	0.0333421	0.0453841	0.0537823	0.0538349	0.0617139
b0936	ssua, eck0927, jw0919, ycbo	alkanesulfonate transporter subunit	0.028	0.039	0.065	0.09	0.114	0.0387995	0.0426833	0.0565319	0.0634525	0.0670962
b0937	ssue, eck0928, jw0920, ssi4, ycbp	nad(p)h-dependent fmn reductase (ec:1,5,1,29)	0.022	0.025	0.056	0.082	0.101	0.0306444	0.0277221	0.0491228	0.0577415	0.0592057
b0938	ycbq, eck0929, fmai, jw5122	predicted fimbrial-like adhesin protein	0.012	0.032	0.065	0.096	0.136	0.0166126	0.0350813	0.0570753	0.0682703	0.0800138
b0939	ycbr, eck0930, jw0922	predicted periplasmic pilin chaperone	0.013	0.028	0.036	0.052	0.077	0.0182596	0.0311514	0.0315548	0.0369907	0.0452116
b0940	ycbs, eck0931, jw0923	predicted outer membrane usher protein	0.029	0.051	0.078	0.121	0.167	0.0406886	0.0561727	0.0680573	0.0857101	0.0979585
b0941	ycbt, eck0932, fmaj, jw0924	predicted fimbrial-like adhesin protein	0.024	0.043	0.07	0.091	0.124	0.0333727	0.0478347	0.0609198	0.0646615	0.0728445
b0942	ycbu, eck0933, fmak, jw0925	predicted fimbrial-like adhesin protein	0.128	0.223	0.191	0.382	0.501	0.177957	0.245554	0.167118	0.270663	0.294231	1	1.37985	0.93909	1.52095	1.65338
b0943	ycbv, eck0934, fmal, jw5123	predicted fimbrial-like adhesin protein	0.034	0.094	0.096	0.151	0.191	0.0468351	0.104007	0.083419	0.106759	0.111953
b0944	ycbf, eck0935, jw5124	predicted periplasmic pilini chaperone	0.049	0.095	0.119	0.166	0.247	0.0688151	0.104994	0.10428	0.117585	0.145323	1	1.52573	1.51536	1.70871	2.11179
b0945	pyrd, eck0936, jw0928	dihydro-orotate oxidase, fmn-linked (ec:1,3,3,1)	0.087	0.087	0.743	1.273	2.326	0.121557	0.0964054	0.648442	0.900705	1.36568	1	0.793091	5.33449	7.40976	11.235	85.5	181	379	522	917	117.785	199.13	309.627	358.381	542.21	1	1.69062	2.62875	3.04267	4.6034	0.067169	0.140731	0.225924	0.317235	0.452599	1	2.09518	3.36351	4.72293	6.73821	968.971	2065.55	477.493	397.889	397.025	28.6085	35.4543
b0946	ycbw, eck0937, jw5125	predicted protein	0.202	0.202	0.584	0.665	0.804	0.280804	0.22249	0.510138	0.47035	0.472214	1	0.792332	1.8167	1.67501	1.68165
b0947	ycbx, eck0938, jw5126	predicted 2fe-2s cluster-containing protein	0.155	0.205	0.405	0.527	0.654	0.216338	0.225927	0.353994	0.373218	0.384299	1	1.04432	1.6363	1.72516	1.77638	170.5	149	196.5	177	155	234.881	163.924	160.532	121.52	91.6495	1	0.697905	0.683462	0.517368	0.390196											1085.71	725.564	453.489	325.6	238.485
b0948	rlml, eck0939, jw0931, ycby	23s rrna mg2445 methyltransferase, sam-dependent	0.085	0.136	0.256	0.396	0.664	0.118289	0.149634	0.223921	0.280588	0.389681	1	1.26499	1.89301	2.37206	3.29433	12	15	19	23	23	16.5312	16.5025	15.5222	15.7907	13.5996	1	0.998262	0.938964	0.955207	0.822663											139.753	110.285	69.3198	56.2773	34.8993
b0949	uup, eck0940, jw0932, ycbh, ycbi	fused predicted transporter subunits of abc superfamily: atp-binding	0.231	0.524	0.562	0.804	1.374	0.321762	0.577453	0.490652	0.568998	0.806995	1	1.79466	1.52489	1.76838	2.50805
b0950	pqia, eck0941, jw0933, pqi5	paraquat-inducible membrane protein a	0.058	0.117	0.154	0.204	0.366	0.080268	0.129522	0.13446	0.144354	0.214938	1	1.61362	1.67514	1.7984	2.67776
b0951	pqib, eck0942, jw0934, pqi5	paraquat-inducible protein b	0.059	0.167	0.238	0.348	0.642	0.0819771	0.184473	0.207457	0.246304	0.376764	1	2.2503	2.53067	3.00454	4.59596
b0952	ymba, eck0943, jw5127	conserved protein	0.095	0.207	0.255	0.339	0.552	0.13289	0.228378	0.222547	0.23969	0.324372	1	1.71855	1.67467	1.80368	2.44091
b0953	rmf, eck0944, jw0936	ribosome modulation factor	9.877	6.15	5.009	4.547	5.429	13.753	6.78076	4.37347	3.21819	3.18796	1	0.493038	0.318001	0.233999	0.231801	3466.5	1277	778	375		4775.45	1404.91	635.593	257.457		1	0.294194	0.133096	0.0539127												347.23	207.191	145.329	80.0007
b0954	faba, eck0945, jw0937	beta-hydroxydecanoyl thioester dehydrase (ec:4,2,1,60)	0.689	0.414	1.203	1.65	1.825	0.959261	0.45627	1.05018	1.16746	1.07181	1	0.475647	1.09478	1.21704	1.11732	4176	4578.5	6042	7525	7157.5	5752.86	5037.1	4936.06	5166.31	4232.14	1	0.875583	0.858018	0.898043	0.735659	0.215833	0.41454	0.616032	0.80016	0.964627	1	1.92065	2.8542	3.70731	4.46932	5997.17	11039.7	4700.18	4425.25	3948.6	1.88213	4.12858
b0955	ycbz, eck0946, jw0938	predicted peptidase	0.227	0.476	0.472	0.623	1.083	0.316096	0.524953	0.412172	0.440884	0.636192	1	1.66074	1.30395	1.39478	2.01266
b0956	ycbg, eck0947, jw0939	conserved protein	0.147	0.269	0.398	0.536	0.689	0.204793	0.296082	0.347408	0.379533	0.404397	1	1.44576	1.69638	1.85325	1.97466	157	178.5	201.5	189	197.5	216.283	196.379	164.617	129.758	116.779	1	0.907973	0.761118	0.599947	0.539937											1056.11	663.259	473.844	341.89	288.774
b0957	ompa, con, eck0948, jw0940, tolg, tut	outer membrane protein a (3a;ii*;g;d)	1.505	5.605	8.055	12.1	15.797	2.09555	6.18049	7.03322	8.56349	9.27556	1	2.94934	3.35626	4.08651	4.42631	3064	4084.5	6317	7335	8261.5	4220.96	4493.62	5160.72	5035.86	4884.92	1	1.0646	1.22264	1.19306	1.1573											2014.25	727.066	733.764	588.062	526.644
b0958	sula, eck0949, jw0941, sfia	sos cell division inhibitor	0.307	0.506	0.656	0.795	0.891	0.428147	0.55832	0.572704	0.56298	0.523163	1	1.30404	1.33763	1.31492	1.22192
b0959	sxy, eck0950, jw0942, tfox, yccr	conserved protein	0.064	0.155	0.176	0.228	0.276	0.0896231	0.171226	0.153674	0.161198	0.162191	1	1.91051	1.71467	1.79862	1.8097
b0960	yccs, eck0951, jw5128	predicted inner membrane protein	0.048	0.085	0.159	0.235	0.42	0.0662056	0.0941976	0.139128	0.166305	0.246866	1	1.4228	2.10145	2.51194	3.72878
b0961	yccf, eck0952, jw0944	conserved inner membrane protein	0.074	0.083	0.282	0.409	0.656	0.102697	0.091747	0.245877	0.28961	0.385375	1	0.893376	2.3942	2.82004	3.75255
b0962	held, eck0953, jw0945, srjb	dna helicase iv (ec:3,6,1,-)	0.109	0.226	0.34	0.436	0.651	0.152141	0.248983	0.296918	0.308854	0.382146	1	1.63653	1.9516	2.03006	2.51179	224	275.5	392.5	401.5	419	308.582	303.095	320.656	275.651	247.749	1	0.982218	1.03913	0.893282	0.802863											2028.27	1217.33	1079.95	892.496	648.311
b0963	mgsa, eck0954, jw5129, mgs, yccg	methylglyoxal synthase (ec:4,2,3,3)	0.548	0.869	1.424	1.704	1.953	0.763044	0.958166	1.24365	1.20626	1.14679	1	1.25572	1.62985	1.58085	1.50292	756	797.5	1285.5	1111	1064	1041.47	877.381	1050.2	762.76	629.13	1	0.842449	1.00839	0.732391	0.604081											1364.88	915.687	844.452	632.337	548.599
b0964	ycct, eck0955, jw0947	conserved protein	0.123	0.154	0.181	0.207	0.19	0.171032	0.17024	0.157791	0.146158	0.111597	1	0.995372	0.922581	0.854568	0.652495
b0965	yccu, eck0956, jw5130	predicted coa-binding protein with nad(p)-binding rossmann-fold	0.647	0.917	1.177	1.521	1.886	0.900972	1.01066	1.0274	1.07664	1.10733	1	1.12174	1.14033	1.19497	1.22904	1407.5	1434	1829	1625	1748	1938.97	1577.64	1494.21	1115.65	1033.57	1	0.813646	0.770622	0.575382	0.533051											2152.09	1561	1454.36	1036.24	933.39
b0966	hspq, eck0957, jw5970, yccv	dna-binding protein, hemimethylated	0.823	0.819	0.936	1.045	1.126	1.14615	0.903465	0.817478	0.739515	0.660951	1	0.788258	0.713235	0.645214	0.576668
b0967	rlmi, eck0958, jw5898, yccw	23s rrna m(5)c1962 methyltransferase, sam-dependent	0.148	0.145	0.376	0.485	0.831	0.206562	0.159694	0.327922	0.343445	0.487995	1	0.773105	1.58752	1.66267	2.36246	38	60	84	117	121	52.3488	66.0098	68.6244	80.3267	71.5458	1	1.26096	1.31091	1.53445	1.36671											253.428	413.351	209.271	233.885	146.612
b0968	yccx, eck0959, jw5131	predicted acylphosphatase	0.406	0.572	0.608	1.001	1.222	0.565985	0.630682	0.530719	0.708534	0.717649	1	1.11431	0.93769	1.25186	1.26796	167.5	133.5	133.5	125.5	126	230.748	146.872	109.064	86.1624	74.5022	1	0.636504	0.472653	0.373405	0.322873											407.693	232.878	205.502	121.607	103.814
b0969	ycck, eck0960, jw0952, tuse	predicted sulfite reductase subunit	0.05	0.076	0.218	0.331	0.486	0.0703138	0.0838947	0.19044	0.23397	0.285264	1	1.19315	2.70844	3.32752	4.05701
b0970	ycca, eck0961, jw0953	inner membrane protein	0.626	0.698	1.725	2.438	2.874	0.871946	0.769528	1.50653	1.72563	1.68755	1	0.882541	1.72778	1.97906	1.93538	101					139.138																				159.571
b0971	sert, dive, eck0962, jwr0026	trna-ser	0.049	0.062	0.211	0.277	0.236	0.0681846	0.0684405	0.184406	0.19578	0.138864	1		2.70451	2.87132	2.03659																0.0300346	0.0566244	0.0824166	0.104832	0.124528	1	1.8853	2.74405	3.49037	4.14616
b0972	hyaa, eck0963, jw0954	hydrogenase 1, small subunit (ec:1,12,99,6)	0.052	0.062	0.084	0.119	0.158	0.0726813	0.0679474	0.0735401	0.0839056	0.0925762
b0973	hyab, eck0964, jw0955	hydrogenase 1, large subunit (ec:1,12,99,6)	0.05	0.093	0.072	0.15	0.203	0.0698946	0.102536	0.062838	0.106163	0.119133	1	1.467		1.5189	1.70446
b0974	hyac, eck0965, jw0956	hydrogenase 1, b-type cytochrome subunit	0.061	0.122	0.183	0.308	0.575	0.0849168	0.13418	0.15998	0.217731	0.337656	1	1.58014	1.88397	2.56405	3.97631
b0975	hyad, eck0966, jw0957	protein involved in processing of hyaa and hyab proteins	0.053	0.085	0.091	0.141	0.181	0.073221	0.0934617	0.0798544	0.0998477	0.106215	1	1.27643		1.36365
b0976	hyae, eck0967, jw0958	protein involved in processing of hyaa and hyab proteins	0.118	0.16	0.156	0.21	0.299	0.164884	0.176863	0.136386	0.148567	0.175464	1	1.07265	0.827164	0.901039	1.06417
b0977	hyaf, eck0968, jw0959	protein involved in nickel incorporation into hydrogenase-1 proteins	0.044	0.065	0.071	0.11	0.189	0.0613175	0.071627	0.0617431	0.0781946	0.111231	1				1.81402
b0978	appc, cbda, cyxa, eck0969, jw0960	cytochrome bd-ii oxidase, subunit i (ec:1,10,3,-)	0.05	0.058	0.087	0.134	0.201	0.0702238	0.0637821	0.0762897	0.0950299	0.118056	1			1.35324	1.68114																8.47853	15.3505	20.3821	23.2368	26.5229	1	1.81052	2.40396	2.74066	3.12824
b0979	appb, cbdb, cyxb, eck0970, jw0961	cytochrome bd-ii oxidase, subunit ii (ec:1,10,3,-)	0.164	0.384	0.494	1.035	2.055	0.228361	0.423153	0.431378	0.732298	1.20672	1	1.853	1.88902	3.20676	5.28427																8.47853	15.3505	20.3821	23.2368	26.5229	1	1.81052	2.40396	2.74066	3.12824
b0980	appa, eck0971, jw0963	phosphoanhydride phosphorylase (ec:3,1,3,26 3,1,3,2)	0.065	0.092	0.144	0.192	0.246	0.0902231	0.101064	0.125684	0.135936	0.144247	1	1.12015	1.39304	1.50667	1.59878
b0981	etk, eck0972, jw0964, yccc	cryptic autophosphorylating protein tyrosine kinase etk	0.078	0.139	0.159	0.197	0.302	0.109174	0.153807	0.138576	0.139545	0.177262	1	1.40883	1.26932	1.27819	1.62367
b0982	etp, eck0973, jw5132, yccy	phosphotyrosine-protein phosphatase	0.018	0.032	0.076	0.098	0.123	0.0247677	0.034831	0.0666825	0.0694703	0.0724785
b0983	gfce, eck0974, jw0966, yccz	predicted exopolysaccharide export protein	0.068	0.123	0.143	0.218	0.329	0.0947208	0.135409	0.124861	0.154576	0.193043	1	1.42956	1.3182	1.63191	2.03802
b0984	gfcd, eck0975, jw0967, ymca	conserved protein	0.016	0.019	0.03	0.042	0.075	0.0220682	0.0208486	0.0257921	0.029773	0.0437799
b0985	gfcc, eck0976, jw0968, ymcb	conserved protein	0.02	0.014	0.038	0.053	0.075	0.0283955	0.0159474	0.0332013	0.0375951	0.0441352
b0986	gfcb, eck0977, jw0969, ymcc	predicted outer membrane lipoprotein	0.012	0.012	0.038	0.051	0.115	0.0170012	0.0134894	0.0334812	0.0360885	0.0674622
b0987	gfca, eck0978, jw5133, ymcd	predicted protein	0.38	0.514	0.545	0.822	0.799	0.529704	0.566657	0.475562	0.581926	0.46934	1	1.06976	0.897787	1.09859	0.886041
b0989	csph, cspk, eck0979, jw5134	stress protein, member of the cspa-family	0.012	0.03	0.047	0.07	0.147	0.0164614	0.0331163	0.0407504	0.0496216	0.0861174
b0990	cspg, cspi, eck0980, jw0974	dna-binding transcriptional regulator	0.031	0.293	0.172	0.234	1.487	0.0436273	0.322575	0.150101	0.165402	0.87337
b0991	ymce, eck0981, jw0975, sfa	cold shock gene	0.023	0.037	0.114	0.185	0.284	0.0325019	0.0404755	0.0996121	0.130821	0.166852
b0992	yccm, eck0983, jw0977	predicted 4fe-4s membrane protein	0.022	0.042	0.06	0.091	0.153	0.0301649	0.0466057	0.0521358	0.0643547	0.089702
b0993	tors, eck0984, jw5135, ycci	hybrid sensory histidine kinase in two-component regulatory system	0.017	0.024	0.038	0.051	0.073	0.0234481	0.0267359	0.0334812	0.0363862	0.0427035
b0994	tort, eck0985, jw0979, ycch	periplasmic sensory protein associated with the torrs two-component	0.068	0.117	0.113	0.17	0.224	0.0947514	0.128786	0.0987889	0.119994	0.131329	1	1.3592	1.04261	1.26641	1.38604
b0995	torr, eck0986, jw0980	dna-binding response regulator in two-component regulatory system	0.05	0.055	0.142	0.202	0.194	0.0689654	0.0601025	0.124309	0.142847	0.114106	1		1.80249	2.07129	1.65453
b0996	torc, eck0987, jw0981	trimethylamine n-oxide (tmao) reductase i, cytochrome c-type subunit	0.016	0.017	0.023	0.034	0.049	0.0225783	0.0191339	0.0197578	0.0237552	0.0287094
b0997	tora, eck0988, jw0982	trimethylamine n-oxide (tmao) reductase i, catalytic subunit	0.051	0.067	0.077	0.108	0.127	0.0709443	0.073349	0.0675057	0.076688	0.0746315	1	1.0339
b0998	tord, eck0989, jw0983	chaperone involved in maturation of tora subunit of trimethylamine	0.029	0.05	0.065	0.095	0.112	0.0407794	0.0554368	0.0565319	0.0673681	0.0656645
b0999	cbpm, eck0990, jw0984, yccd	modulator of cbpa co-chaperone	0.643	0.845	0.921	1.503	2.089	0.895844	0.93143	0.803755	1.06341	1.22645	1	1.03972	0.897203	1.18705	1.36905
b1000	cbpa, eck0991, jw0985	curved dna-binding protein, dnaj homologue that functions as a	0.311	0.464	0.777	1.079	1.276	0.432526	0.511706	0.678079	0.763875	0.749221	1	1.18307	1.56772	1.76608	1.7322	409	419	488.5	540	613.5	563.438	460.969	399.084	370.739	362.755	1	0.818135	0.708301	0.657993	0.643823											1302.67	900.846	588.551	485.339	484.176
b1001	ycce, eck0992, jw0986	predicted protein	0.006	0.015	0.025	0.031	0.057	0.00899532	0.0166833	0.0219558	0.0222576	0.0333705
b1002	agp, eck0993, jw0987	glucose-1-phosphatase/inositol phosphatase (ec:3,1,3,10)	0.628	1.2	0.759	0.732	0.398	0.875035	1.32368	0.662709	0.518167	0.233593	1	1.51271	0.757352	0.592167	0.266953	2396	2306.5	1738.5	1107	699	3300.73	2537.53	1420.28	760.014	413.31	1	0.768778	0.430293	0.230256	0.125218											3772.11	1917.03	2143.14	1466.74	1769.36
b1003	yccj, eck0994, jw0988	predicted protein	0.575	0.616	1.138	1.372	1.608	0.801304	0.67901	0.99338	0.971077	0.944062	1	0.847382	1.2397	1.21187	1.17816	2491.5	1952.5	2390.5	2909.5	2906.5	3432.29	2148.07	1952.94	1997.53	1718.58	1	0.625842	0.568989	0.581981	0.500708											4283.38	3163.53	1965.95	2057.02	1820.41
b1004	wrba, eck0995, jw0989	nad(p)h:quinone oxidoreductase	1.565	1.247	2.405	3.139	3.95	2.17957	1.37445	2.09982	2.22154	2.31943	1	0.630608	0.963409	1.01926	1.06417	6443.5	5409.5	6410	6238	6416	8876.56	5951.34	5236.7	4282.72	3793.7	1	0.670455	0.589946	0.482475	0.427384											4072.62	4329.97	2493.88	1927.81	1635.62
b1006	rutg, eck0997, jw5137, ycdg	predicted transporter	0.039	0.059	0.078	0.098	0.12	0.0546313	0.064518	0.068329	0.0691725	0.0703256
b1007	rutf, eck0998, jw5138, ycdh	predicted oxidoreductase, flavin:nadh component	0.043	0.044	0.069	0.088	0.203	0.0603289	0.0485706	0.0603682	0.0622526	0.119133	1				1.97472
b1008	rute, eck0999, jw0993, ycdi	predicted oxidoreductase	0.048	0.039	0.047	0.124	0.102	0.0665051	0.0434192	0.0414337	0.0878122	0.0599269
b1009	rutd, eck1000, jw0994, ycdj	predicted hydrolase	0.047	0.045	0.054	0.083	0.12	0.0656947	0.0497996	0.0469247	0.0586437	0.0706916
b1010	rutc, eck1001, jw0995, ycdk	conserved protein	0.022	0.017	0.028	0.042	0.059	0.0308243	0.018891	0.0244256	0.029773	0.034447
b1011	rutb, eck1002, jw5139, ycdl	predicted enzyme	0.024	0.033	0.039	0.06	0.095	0.032743	0.0363029	0.0343044	0.0424039	0.0559763
b1012	ruta, eck1003, jw0997, ycdm	predicted monooxygenase	0.034	0.053	0.07	0.123	0.18	0.0470464	0.0588735	0.0609198	0.0872168	0.105494
b1013	rutr, eck1004, jw0998, ycdc	predicted dna-binding transcriptional regulator	0.064	0.087	0.177	0.248	0.323	0.0888432	0.0964054	0.154769	0.175633	0.189458	1	1.08512	1.74205	1.97689	2.1325
b1014	puta, eck1005, jw0999, poaa, putc	fused dna-binding transcriptional regulator/proline	0.103	0.205	0.24	0.284	0.291	0.144106	0.22642	0.209926	0.200895	0.170803	1	1.57121	1.45675	1.39408	1.18526
b1015	putp, eck1006, jw1001, putc	proline:sodium symporter	0.237	0.527	0.538	0.589	0.67	0.329468	0.581133	0.47007	0.416524	0.393266	1	1.76385	1.42676	1.26423	1.19364
b1018	efeo, eck1008, jw1003, ycdo	conserved protein	0.132	0.27	0.629	0.973	1.492	0.183835	0.297804	0.549102	0.688685	0.876244	1	1.61996	2.98693	3.74622	4.76648	197	420	762	650	1236	271.387	462.069	622.521	446.259	730.831	1	1.70262	2.29385	1.64436	2.69295											1476.26	1551.59	1133.71	647.988	834.049
b1019	efeb, eck1009, jw1004, ycdb	conserved protein	0.081	0.192	0.307	0.414	0.623	0.112353	0.212187	0.268376	0.293219	0.365999	1	1.88859	2.3887	2.60981	3.25759
b1020	phoh, eck1010, jw1005, psih	conserved protein with nucleoside triphosphate hydrolase domain	0.288	0.357	0.713	0.866	0.555	0.400862	0.393474	0.62237	0.613206	0.325814	1	0.981568	1.55258	1.52972	0.812784
b1021	pgad, eck1011, hmss, jw1006, ycdp	predicted inner membrane protein	0.036	0.087	0.104	0.154	0.216	0.0507633	0.0954266	0.0905565	0.109168	0.126668
b1022	pgac, eck1012, hmsr, jw1007, ycdq	predicted glycosyl transferase	0.022	0.04	0.05	0.082	0.122	0.0308549	0.0436621	0.0439034	0.0577415	0.0714021
b1023	pgab, eck1013, jw5142, ycdr	predicted enzyme associated with biofilm formation	0.012	0.026	0.032	0.056	0.084	0.017361	0.0289437	0.0282619	0.0393996	0.0491623
b1024	pgaa, eck1014, jw1010, ycds	predicted outer membrane protein	0.016	0.034	0.055	0.086	0.137	0.022249	0.0370388	0.0482995	0.0607459	0.0803798
b1025	ycdt, eck1015, jw5143	predicted diguanylate cyclase	0.083	0.139	0.166	0.253	0.346	0.115049	0.153314	0.144619	0.178936	0.203097	1	1.33259	1.25702	1.55529	1.7653
b1026	insf, eck0299	is3 element protein insf	0.457	0.322	0.316	0.405	0.391	0.635819	0.355449	0.276337	0.286605	0.229643	1	0.559041	0.434616	0.450766	0.361176
b1027	inse, eck0298	is3 element protein inse	0.35	0.222	0.427	0.576	0.652	0.487637	0.245061	0.372656	0.407502	0.382867	1	0.502547	0.764208	0.835665	0.785147
b1028	ymde, eck1016, jw5145	pseudogene	0.01	0.018	0.029	0.039	0.047	0.0144816	0.0201127	0.0249689	0.0273641	0.0276329
b1029	ycdu, eck1017, jw1015	predicted inner membrane protein	0.011	0.008	0.015	0.015	0.027	0.014872	0.00883103	0.0131719	0.0105288	0.016147
b1032	serx, eck1018, jwr0027	trna-ser	2.657	2.077	3.909	3.702	5.115	3.69951	2.29018	3.41316	2.62002	3.00334	1	0.61905	0.922598	0.708208	0.811823																0.0300346	0.0566244	0.0824166	0.104832	0.124528	1	1.8853	2.74405	3.49037	4.14616
b1033	ghra, eck1019, jw5146, ycdw	2-ketoacid reductase (ec:1,1,1,79)	0.258	0.44	0.85	1.065	1.32	0.358644	0.484971	0.742292	0.753644	0.775057	1	1.35223	2.06971	2.10137	2.16107	275	429.5	531.5	596	629.5	378.84	472.521	434.213	409.185	372.215	1	1.24728	1.14616	1.0801	0.982514											1056.31	974.328	584.963	542.943	480.243
b1034	ycdx, eck1020, jw1017	predicted zinc-binding hydrolase	0.34	0.496	1.026	1.435	1.963	0.473694	0.547031	0.895414	1.01589	1.15254	1	1.15482	1.89028	2.14461	2.43309
b1035	ycdy, eck1021, jw1018	conserved protein	0.143	0.239	0.548	0.719	1.029	0.199636	0.263702	0.478303	0.508549	0.604253	1	1.32091	2.39588	2.54738	3.02678	319.5	485	672	829.5	1103	440.143	533.58	548.995	569.496	652.19	1	1.21229	1.24731	1.29389	1.48177											2204.73	2023.42	1147.8	1119.84	1079.33
b1036	ycdz, eck1022, jw5147	predicted inner membrane protein	0.258	0.258	0.495	0.631	1.123	0.359453	0.284308	0.432473	0.446297	0.659153	1	0.790945	1.20314	1.2416	1.83377
b1037	csgg, agfg, eck1023, jw1020	outer membrane lipoprotein	0.6	0.197	0.361	0.442	0.396	0.835906	0.217096	0.31503	0.31277	0.232517	1	0.259714	0.376872	0.374168	0.278162
b1038	csgf, agff, eck1024, jw1021	predicted transport protein	0.951	0.191	0.572	0.651	0.522	1.32483	0.210716	0.499156	0.46103	0.306793	1	0.159051	0.376769	0.347991	0.231572	498					686.045																				517.835
b1039	csge, agfe, eck1025, jw1022	predicted transport protein	0.763	0.159	0.434	0.5	0.405	1.06247	0.175642	0.378691	0.353965	0.237899	1	0.165315	0.356426	0.333153	0.223912
b1040	csgd, agfd, eck1026, jw1023	dna-binding transcriptional activator in two-component regulatory	1.059	0.204	0.583	0.636	0.435	1.47433	0.224455	0.509034	0.450203	0.255478	1	0.152242	0.345264	0.30536	0.173284	80					110.208																				74.751
b1041	csgb, agfb, eck1027, jw1024	curlin nucleator protein, minor subunit in curli complex	2.477	0.477	0.148	0.162	0.203	3.4495	0.525939	0.128977	0.114581	0.119488	1	0.152468	0.0373901	0.0332167	0.0346392
b1042	csga, agfa, eck1028, jw1025	cryptic curlin major subunit	5.096	0.838	0.272	0.263	0.293	7.09593	0.924071	0.237093	0.185856	0.172235	1	0.130225	0.0334126	0.0261918	0.0242723	1746					2405.29																				338.967
b1043	csgc, agfc, eck1029, jw1026, ycde	predicted curli production protein	0.122	0.09	0.135	0.167	0.141	0.169981	0.0995919	0.117723	0.117892	0.082888	1	0.5859	0.692568	0.693559		373					513.845																				3022.95
b1044	ymda, eck1030, jw1031	predicted protein	0.233	0.234	0.456	0.616	0.417	0.324341	0.258308	0.397897	0.436066	0.245079	1	0.796408	1.22679	1.34447	0.755623
b1045	ymdb, eck1031, jw1032	conserved protein	0.238	0.425	0.425	0.528	0.681	0.331597	0.469023	0.37101	0.373813	0.400091	1	1.41444	1.11886	1.12731	1.20656	338	292	292.5	264	289.5	465.629	321.248	238.96	181.25	171.178	1	0.689923	0.513199	0.389259	0.367627											1404.2	684.93	644.08	484.868	427.847
b1046	ymdc, eck1032, jw5150	predicted hydrolase	0.059	0.095	0.124	0.156	0.193	0.0827264	0.104258	0.108396	0.110674	0.113384	1	1.26027	1.3103	1.33783	1.37059
b1047	opgc, eck1033, jw1034, mdoc, ymdd	membrane protein required for modification of periplasmic glucan	0.043	0.039	0.118	0.169	0.344	0.0593988	0.0426833	0.103457	0.119696	0.202021	1		1.74173	2.01513	3.40109
b1048	opgg, eck1034, jw1035, mdoa, mdog	glucan biosynthesis protein, periplasmic	0.455	0.522	1.202	1.679	2.499	0.63327	0.575246	1.04936	1.18851	1.46758	1	0.908374	1.65705	1.87678	2.31746	1160.5	2130.5	2606	2834	2400	1598.7	2343.9	2128.99	1945.69	1419.09	1	1.46612	1.3317	1.21704	0.88765											2524.52	4074.61	2028.85	1637.08	966.959
b1049	opgh, eck1035, jw1037, mdoa, mdoh	glucan biosynthesis: glycosyl transferase	0.228	0.509	0.623	0.801	1.511	0.317655	0.56077	0.543611	0.566886	0.887364	1	1.76535	1.71133	1.7846	2.79349	31	52	54		66	42.7056	57.2085	44.1157		39.025	1	1.3396	1.03302		0.913814											134.44	102.018	81.1531		43.9785
b1050	ycek, eck1036, jw5151	predicted lipoprotein	0.053	0.105	0.152	0.211	0.269	0.0736267	0.115907	0.132953	0.149316	0.158241	1	1.57425	1.80578	2.02801	2.14923
b1051	msyb, eck1037, jw1039	predicted protein	1.672	0.718	2.401	3.025	3.935	2.32775	0.791606	2.09652	2.14065	2.31082	1	0.340073	0.900665	0.919621	0.992727	552	467	510.5	566	532.5	760.435	513.777	417.057	388.589	314.86	1	0.675635	0.548445	0.511009	0.414053											326.682	649.031	198.928	181.528	136.255
b1053	mdtg, eck1038, jw1040, ycee	predicted drug efflux system	0.02	0.037	0.058	0.077	0.136	0.0271965	0.0407184	0.0507693	0.0547372	0.0796586
b1054	lpxl, eck1039, htrb, jw1041, waam	lauryl-acyl carrier protein (acp)-dependent acyltransferase	0.084	0.092	0.259	0.357	0.46	0.116281	0.101314	0.226391	0.252321	0.270193	1	0.871287	1.94694	2.16993	2.32363
b1055	ycea, eck1040, jw1042	conserved protein	0.221	0.146	0.863	1.185	1.489	0.30812	0.161409	0.753817	0.838759	0.874447	1	0.523852	2.44651	2.72219	2.83801
b1056	ycei, eck1041, jw1043	predicted protein	0.161	0.439	0.601	0.748	1.085	0.223895	0.484477	0.524956	0.5293	0.637269	1	2.16386	2.34466	2.36406	2.84629	658.5	828	1096.5	1083	1036	907.149	910.936	895.794	743.537	612.574	1	1.00417	0.987482	0.819641	0.675273											4051.68	1880.24	1706.42	1404.75	961.248
b1057	ycej, eck1042, jw1044	predicted cytochrome b561	0.082	0.176	0.159	0.268	0.361	0.113731	0.19379	0.138856	0.189762	0.211709	1	1.70393	1.22092	1.66852	1.86149
b1058	yceo, eck1043, jw1045	predicted protein	0.012	0.014	0.042	0.058	0.049	0.0165514	0.0150863	0.0370458	0.0410506	0.0290646
b1059	sola, eck1044, jw1046	n-methyltryptophan oxidase, fad-binding (ec:1,5,3,2)	0.226	0.167	0.679	0.925	1.184	0.314896	0.184223	0.592733	0.654401	0.695043	1	0.585027	1.88232	2.07815	2.20722	199.5	298	350	397	502.5	274.831	327.849	285.935	272.561	297.122	1	1.19291	1.0404	0.991742	1.08111											872.769	1779.64	482.401	416.505	427.487
b1060	bsss, eck1045, jw5152, ycep	predicted protein	0.25	0.319	0.309	0.381	0.515	0.348149	0.351276	0.269471	0.269761	0.302487	1	1.00898	0.774012	0.774845	0.868845
b1061	dini, eck1046, jw1048	dna damage-inducible protein i	0.112	0.248	0.468	0.698	1.193	0.15649	0.273269	0.408599	0.493807	0.700425	1	1.74624	2.61103	3.15552	4.47585
b1062	pyrc, eck1047, jw1049	dihydro-orotase (ec:3,5,2,3)	0.411	0.258	1.623	2.287	3.538	0.572193	0.284065	1.41735	1.61886	2.07758	1	0.496449	2.47705	2.82923	3.63091	821.5	1154	1531	2098.5	2241	1131.7	1269.59	1250.76	1440.73	1325.07	1	1.12184	1.10521	1.27307	1.17087	0.0837254	0.187805	0.255736	0.319693	0.412233	1	2.24311	3.05446	3.81835	4.92364	1977.83	4469.37	882.466	889.964	637.797	3.71144	7.42095
b1063	yceb, eck1048, jw1050	predicted lipoprotein	0.085	0.152	0.339	0.433	0.705	0.118708	0.167054	0.295815	0.306454	0.413719	1	1.40727	2.49196	2.58159	3.48519
b1064	grxb, eck1049, jw1051	glutaredoxin 2 (grx2)	0.599	1.005	1.9	2.516	3.213	0.834287	1.10854	1.6591	1.78067	1.88669	1	1.32872	1.98865	2.13436	2.26144	1096	1362	1884	2211.5	2345.5	1509.85	1498.42	1539.15	1518.31	1386.86	1	0.992433	1.0194	1.0056	0.918545											1809.75	1351.71	927.699	852.664	735.077
b1065	mdth, eck1050, jw1052, ycel	predicted drug efflux system	0.079	0.107	0.122	0.161	0.278	0.109863	0.117747	0.10675	0.113976	0.163268	1	1.07177	0.971665	1.03744	1.48611
b1066	rimj, eck1051, jw1053, tcp	ribosomal-protein-s5-alanine n-acetyltransferase (ec:2,3,1,128)	0.285	0.47	0.92	1.321	1.479	0.396393	0.51858	0.803211	0.934989	0.868709	1	1.30825	2.0263	2.35874	2.19153
b1067	yceh, eck1052, jw1054	conserved protein	0.161	0.297	0.531	0.759	0.829	0.223624	0.327484	0.463213	0.537113	0.486563	1	1.46444	2.07139	2.40186	2.17581	346	454	593	683.5	832	476.649	499.475	484.456	469.259	491.951	1	1.04789	1.01638	0.984495	1.0321											2131.48	1525.19	1045.86	873.668	1011.07
b1068	ycem, eck1053, jw1055, mvim, mvis	predicted oxidoreductase with nad(p)-binding rossmann-fold domain	0.154	0.295	0.41	0.545	0.691	0.215078	0.325276	0.357838	0.385849	0.405828	1	1.51236	1.66376	1.79399	1.88689
b1069	murj, eck1054, jw1056, mvin, mvis, ycen	predicted inner membrane protein	0.032	0.051	0.111	0.156	0.269	0.0452474	0.0564229	0.0965908	0.110674	0.157885
b1070	flgn, eck1055, jw1057	export chaperone for flgk and flgl	0.559	1.201	1.289	1.66	1.208	0.778994	1.32416	1.1251	1.17498	0.709037	1	1.69983	1.4443	1.50833	0.910195	112.5					154.98																				198.949
b1071	flgm, eck1056, jw1058, mvis	anti-sigma factor for flia (sigma 28)	0.867	1.74	1.864	2.482	1.94	1.20762	1.91878	1.62728	1.75631	1.1389	1	1.58889	1.3475	1.45435	0.943095	393.5					542.085																				448.887
b1072	flga, eck1057, flau, jw1059	assembly protein for flagellar basal-body periplasmic p ring	0.416	0.409	1.106	1.484	1.096	0.579839	0.451118	0.96539	1.05017	0.643727	1	0.778007	1.66493	1.81115	1.11018
b1073	flgb, eck1058, flba, jw1060	flagellar component of cell-proximal portion of basal-body rod	1.359	1.381	2.446	3.526	2.692	1.89292	1.52237	2.13549	2.49552	1.58061	1	0.804247	1.12815	1.31834	0.835013
b1074	flgc, eck1059, flaw, jw1061	flagellar component of cell-proximal portion of basal-body rod	1.437	1.737	2.681	3.928	2.98	2.00143	1.9151	2.34047	2.77971	1.74961	1	0.956867	1.1694	1.38886	0.874182
b1075	flgd, eck1060, flav, jw1062	flagellar hook assembly protein	1.043	1.368	2.179	2.972	2.709	1.45301	1.50839	1.90278	2.10366	1.59066	1	1.03811	1.30954	1.44779	1.09473
b1076	flge, eck1061, flak, jw1063	flagellar hook protein	1.238	2.069	2.55	3.929	3.361	1.72344	2.28111	2.22687	2.78062	1.97352	1	1.32357	1.2921	1.61341	1.1451
b1077	flgf, eck1062, flax, jw1064	flagellar component of cell-proximal portion of basal-body rod	0.731	1.442	1.782	2.637	2.432	1.0174	1.59032	1.55565	1.86607	1.42812	1	1.56312	1.52905	1.83415	1.40369
b1078	flgg, eck1063, flal, jw1065	flagellar component of cell-distal portion of basal-body rod	0.725	1.549	1.947	2.681	2.572	1.00892	1.70782	1.70026	1.89705	1.51028	1	1.69273	1.68524	1.88029	1.49694
b1079	flgh, eck1064, flay, jw5153	flagellar protein of basal-body outer-membrane l ring	0.173	0.538	0.553	0.771	0.724	0.241194	0.593644	0.482971	0.545838	0.425205	1	2.46127	2.00241	2.26306	1.76291	77					106.075																				439.791
b1080	flgi, eck1065, flam, jw1067	predicted flagellar basal body protein	0.183	0.515	0.567	0.707	0.692	0.254627	0.567886	0.494768	0.500123	0.406549	1	2.23027	1.94311	1.96414	1.59665
b1081	flgj, eck1066, flaz, jw1068	muramidase	0.168	0.38	0.449	0.585	0.567	0.234449	0.418981	0.391863	0.413817	0.332984	1	1.78709	1.67142	1.76506	1.42028
b1082	flgk, eck1067, flas, jw1069	flagellar hook-filament junction protein 1	0.752	2.213	1.864	2.607	2.669	1.04694	2.44031	1.62728	1.84502	1.56734	1	2.3309	1.55432	1.76231	1.49707	104					143.27																				136.847
b1083	flgl, eck1068, flat, jw1070	flagellar hook-filament junction protein	0.565	1.671	1.65	2.327	1.918	0.78619	1.84298	1.44094	1.64654	1.12598	1	2.34419	1.83282	2.09432	1.4322	233					320.981																				408.273
b1084	rne, ams, eck1069, hmp1, jw1071, smbb	fused ribonucleasee: endoribonuclease/rna-binding protein/rna	0.312	0.74	0.756	1.03	1.074	0.434534	0.815398	0.660239	0.728987	0.630455	1	1.87649	1.51942	1.67763	1.45087	876	840	1181	1362	1674	1206.78	924.138	964.827	935.085	989.815	1	0.76579	0.799507	0.774861	0.820213											2777.17	1133.36	1461.33	1282.72	1570
b1085	yceq, eck1070, jw5154	predicted protein	0.029	0.11	0.095	0.158	0.185	0.04021	0.121184	0.0831473	0.111874	0.108723
b1086	rluc, eck1071, jw1072, ycec	23s rrna pseudouridylate synthase (ec:4,2,1,70)	1.048	1.05	1.586	2.498	4.179	1.45988	1.15736	1.38442	1.76804	2.45362	1	0.792775	0.948309	1.21108	1.6807	42	60	75	83	109	57.8592	66.0098	61.2718	56.9839	64.4503	1	1.14087	1.05898	0.984872	1.11392											39.6328	57.035	44.2581	32.23	26.2674
b1087	ycef, eck1072, jw5155	predicted protein	0.312	0.293	0.721	0.839	1.1	0.434445	0.323311	0.629228	0.593655	0.64588	1	0.744193	1.44835	1.36647	1.48668	501.5	537	561.5	517.5	540	690.866	590.788	458.722	355.291	319.295	1	0.855141	0.66398	0.514269	0.462166											1590.23	1827.3	729.023	598.481	494.356
b1088	yced, eck1074, jw1074	conserved protein	1.464	2.999	4.805	6.298	9.635	2.03894	3.30722	4.19579	4.45753	5.65756	1	1.62203	2.05783	2.1862	2.77475	206.5	283.5	427.5	481	668.5	284.474	311.897	349.249	330.232	395.275	1	1.0964	1.2277	1.16085	1.38949											139.521	94.3078	83.2381	74.0841	69.8668
b1089	rpmf, eck1075, jw1075	50s ribosomal subunit protein l32	1.321	2.575	3.834	5.534	9.093	1.83936	2.83917	3.3473	3.9165	5.33928	1	1.54356	1.81981	2.12927	2.90279	3454.5	4275	6297	8698	12312.5	4758.92	4703.2	5144.38	5971.64	7280.22	1	0.988292	1.081	1.25483	1.52981	0.556233	1.05669	1.55132	1.99067	2.37954	1	1.89972	2.78898	3.57885	4.27796	2587.26	1656.54	1536.88	1524.74	1363.52	5.86359	11.2711
b1090	plsx, eck1076, jw5156	fatty acid/phospholipid synthesis protein	0.549	0.839	1.262	1.759	3.075	0.764513	0.924807	1.10205	1.24505	1.80559	1	1.20967	1.4415	1.62856	2.36175
b1091	fabh, eck1077, jw1077	3-oxoacyl-	0.6	1.055	1.586	2.241	3.461	0.835695	1.16373	1.38469	1.58579	2.03202	1	1.39253	1.65693	1.89757	2.43153	1270	1527.5	1912	2058	2637.5	1749.55	1680.5	1562.02	1412.93	1559.52	1	0.960532	0.892813	0.807593	0.891383	0.0307256	0.0588168	0.0870852	0.112704	0.135527	1	1.91426	2.83428	3.66808	4.41088	2093.53	1444.06	1128.07	890.992	767.475	0.881028	1.75581
b1092	fabd, eck1078, jw1078, tfpa	malonyl-coa-	1.112	2.005	2.845	4.152	6.262	1.54801	2.21046	2.48399	2.9385	3.67686	1	1.42794	1.60464	1.89825	2.37522	2470	2995.5	4148	4484	5736	3402.67	3295.54	3388.74	3078.5	3391.62	1	0.968516	0.995906	0.904731	0.996753	0.0307256	0.0588168	0.0870852	0.112704	0.135527	1	1.91426	2.83428	3.66808	4.41088	2198.1	1490.89	1364.23	1047.64	922.425	0.452998	0.895344
b1093	fabg, eck1079, jw1079	3-oxoacyl-	2.395	3.341	4.242	6.029	9.059	3.33481	3.68401	3.70376	4.26685	5.31955	1	1.10471	1.11064	1.27949	1.59516	2639.5	3153	4265	5147.5	6410	3636.17	3468.82	3484.32	3534.03	3790.15	1	0.953975	0.958239	0.971909	1.04235	0.215833	0.41454	0.616032	0.80016	0.964627	1	1.92065	2.8542	3.70731	4.46932	1090.37	941.588	940.753	828.252	712.495	2.97775	5.99515
b1094	acpp, eck1080, jw1080	acyl carrier protein (acp)	2.625	4.561	7.095	11.23	15.901	3.65546	5.02878	6.19516	7.94758	9.33692	1	1.37569	1.69477	2.17417	2.55424	25542	18744.5	31237	31111	31295.5	35186.6	20622	25519.3	21359.3	18504.6	1	0.586075	0.725255	0.60703	0.525899											9625.78	4100.8	4119.23	2687.53	1981.88
b1095	fabf, cvc, eck1081, fabj, jw1081, vtr	3-oxoacyl-	0.526	0.786	1.375	1.874	2.77	0.732579	0.866419	1.20084	1.32625	1.62654	1	1.1827	1.63919	1.81039	2.2203	517.5	775.5	1144.5	1368.5	1630.5	712.908	853.177	935.008	939.548	964.094	1	1.19676	1.31154	1.31791	1.35234											973.148	984.716	778.63	708.424	592.726
b1096	pabc, eck1082, jw1082	4-amino-4-deoxychorismate lyase component of para-aminobenzoate	0.072	0.106	0.225	0.287	0.378	0.100208	0.116768	0.196483	0.202998	0.221752	1	1.16526	1.96075	2.02576	2.21292
b1097	yceg, eck1083, jw1083	predicted aminodeoxychorismate lyase	0.094	0.131	0.231	0.314	0.514	0.130582	0.144976	0.201966	0.222242	0.301766	1	1.11023	1.54666	1.70194	2.31094
b1098	tmk, eck1084, jw1084, ycfg	thymidylate kinase (ec:2,7,4,9)	0.249	0.424	0.563	0.808	1.203	0.34713	0.467066	0.491746	0.571704	0.706518	1	1.34551	1.41661	1.64695	2.03531	39.5	49.5	65	79	104	54.4152	54.4581	53.1022	54.2377	61.4939	1	1.00079	0.975871	0.996738	1.13009	0.00275	0.00525	0.00775	0.01	0.012	1	1.90909	2.81818	3.63636	4.36364	156.758	116.596	107.987	94.8702	87.038	2.53529	4.83628
b1099	holb, eck1085, jw1085	dna polymerase iii, delta prime subunit (ec:2,7,7,7)	0.105	0.174	0.25	0.328	0.541	0.145995	0.191832	0.218159	0.231868	0.317913	1	1.31396	1.49429	1.58819	2.17756
b1100	ycfh, eck1086, jw1086	predicted metallodependent hydrolase	0.373	0.472	0.499	0.581	0.859	0.51972	0.520788	0.435494	0.411111	0.504142	1	1.00205	0.83794	0.791023	0.970026
b1101	ptsg, car, cat, cr, eck1087, glca, jw1087, tgl, umg, umgc	fused glucose-specific pts enzymes: iib component/iic component	0.752	1.914	5.224	6.988	3.42	1.04682	2.11037	4.56131	4.94532	2.00833	1	2.01599	4.35732	4.72415	1.91852	1157	2317	3761	4296	2394	1593.88	2549.08	3072.58	2949.43	1415.54	1	1.59929	1.92773	1.85047	0.888109	1.47247	2.82748	4.1892	5.24371	6.48853	1	1.92023	2.84502	3.56117	4.40657	1522.6	1207.88	673.618	596.409	704.834	46.3452	55.6457
b1102	fhue, eck1088, jw1088	ferric-rhodotorulic acid outer membrane transporter	0.062	0.09	0.111	0.163	0.185	0.0862939	0.0995919	0.0968707	0.115185	0.108368	1	1.1541	1.12257	1.3348	1.2558
b1103	hint, eck1089, jw1089, ycff	purine nucleoside phosphoramidase	0.349	0.459	1	1.298	1.747	0.486079	0.506312	0.873458	0.918749	1.02587	1	1.04163	1.79695	1.89012	2.11051	2821	3641	4743	5172.5	5730	3886.21	4005.7	3874.83	3551.19	3388.08	1	1.03075	0.997072	0.913794	0.87182											7995.02	7911.52	4436.19	3865.25	3302.63
b1104	ycfl, eck1090, jw1090	predicted protein	0.497	0.681	1.304	1.915	1.96	0.692129	0.750637	1.13854	1.35542	1.1511	1	1.08453	1.64499	1.95833	1.66313
b1105	ycfm, eck1091, jw5157	predicted outer membrane lipoprotein	0.383	0.525	0.927	1.179	1.443	0.533753	0.579411	0.808974	0.834545	0.847535	1	1.08554	1.51563	1.56354	1.58788	276.5	263.5	293	375.5	399	380.906	289.893	239.368	257.801	235.924	1	0.761062	0.628418	0.676808	0.619374											713.638	500.324	295.891	308.911	278.364
b1106	thik, eck1092, jw1092, ycfn	thiamin kinase (ec:2,7,1,89)	0.21	0.3	0.49	0.66	1.015	0.293097	0.33067	0.428085	0.466741	0.596008	1	1.12819	1.46056	1.59244	2.03348
b1107	nagz, eck1093, jw1093, ycfo	beta n-acetyl-glucosaminidase (ec:3,2,1,52)	0.182	0.329	0.531	0.768	1.175	0.253668	0.362565	0.463213	0.543736	0.68966	1	1.42929	1.82606	2.14349	2.71875	61	80	114	131	178	84.0336	88.0131	93.1331	89.9384	105.249	1	1.04736	1.10828	1.07027	1.25247											331.274	242.751	201.059	165.408	152.61
b1108	ycfp, eck1094, jw5158	conserved protein	0.65	0.789	1.25	1.796	2.479	0.904451	0.870099	1.09162	1.27092	1.45538	1	0.962019	1.20694	1.40518	1.60913	1015.5	1018.5	1172	1221.5	1454	1398.95	1120.52	957.474	838.624	859.732	1	0.800969	0.684422	0.599466	0.614554											1546.74	1287.8	877.115	659.857	590.725
b1109	ndh, eck1095, jw1095	respiratory nadh dehydrogenase 2/cupric reductase	0.171	0.141	0.468	0.798	1.418	0.237657	0.155522	0.408599	0.564784	0.832465	1	0.654395	1.71928	2.37646	3.50279	256	285	384	457.5	709.5	352.665	313.547	313.712	314.098	419.518	1	0.889077	0.889544	0.89064	1.18956	7.14076	13.0049	17.5163	20.2543	23.4988	1	1.82122	2.453	2.83644	3.29079	1483.92	2016.1	767.774	556.138	503.947	1015.77	2080.75
b1110	ycfj, eck1096, jw1096	predicted protein	0.093	0.177	0.224	0.306	0.557	0.130193	0.195018	0.195931	0.216233	0.327246	1	1.49792	1.50493	1.66087	2.51355
b1111	ycfq, eck1097, jw5159	predicted dna-binding transcriptional regulator	0.264	0.255	0.551	0.645	0.579	0.368117	0.281364	0.480773	0.456817	0.339808	1	0.764332	1.30603	1.24095	0.923098
b1112	bhsa, eck1098, jw1098, ycfr	predicted protein	0.032	0.066	0.191	0.341	0.852	0.0451871	0.0723629	0.167118	0.241495	0.500202
b1113	ycfs, eck1099, jw5820	l,d-transpeptidase linking lpp to murein	0.05	0.097	0.203	0.266	0.324	0.0702832	0.106951	0.177268	0.188562	0.190179	1	1.52172	2.5222	2.68289	2.7059
b1114	mfd, eck1100, jw1100	transcription-repair coupling factor	0.241	0.534	0.445	0.811	1.05	0.335375	0.588492	0.388298	0.573806	0.616461	1	1.75473	1.1578	1.71094	1.83812	45	54.5	65	73	91	61.992	59.9589	53.1022	50.1184	53.8071	1	0.967205	0.856598	0.808465	0.867969											184.844	101.886	136.756	87.3437	87.284
b1115	ycft, eck1101, jw1101	predicted inner membrane protein	0.107	0.235	0.3	0.467	0.77	0.148483	0.259536	0.262342	0.330814	0.452116	1	1.74792	1.76681	2.22796	3.0449
b1116	lolc, eck1102, jw5161, ycfu	outer membrane-specific lipoprotein transporter subunit	0.173	0.295	0.419	0.583	0.903	0.241285	0.325769	0.365791	0.412608	0.529977	1	1.35014	1.51601	1.71004	2.19648
b1117	lold, eck1103, jw5162, ycfv	outer membrane-specific lipoprotein transporter subunit	0.118	0.237	0.39	0.494	0.842	0.164914	0.261744	0.34027	0.349453	0.494454	1	1.58716	2.06332	2.119	2.99825	87.5	108.5	133.5	154	217.5	120.54	119.368	109.064	105.729	128.605	1	0.990276	0.904794	0.877129	1.06691											730.926	456.048	320.521	302.556	260.095
b1118	lole, eck1104, jw1104, ycfw	outer membrane-specific lipoprotein transporter subunit	0.231	0.449	0.492	0.615	0.948	0.321554	0.494537	0.429732	0.435164	0.556534	1	1.53796	1.33642	1.35331	1.73076
b1119	nagk, eck1105, jw1105, ycfx	n-acetyl-d-glucosamine kinase (ec:2,7,1,59)	0.236	0.496	0.512	0.651	0.929	0.32908	0.547281	0.44702	0.46103	0.545769	1	1.66307	1.35839	1.40097	1.65847	79					108.83																				330.711
b1120	cobb, eck1106, jw1106, ycfy	deacetylase of acetyl-coa synthetase, nad-dependent	0.189	0.378	0.512	0.84	1.027	0.263053	0.416773	0.447291	0.594259	0.602822	1	1.58437	1.70039	2.25909	2.29164	183	254.5	382.5	378.5	449.5	252.101	279.992	312.486	259.86	265.784	1	1.11063	1.23953	1.03078	1.05428											958.365	671.809	698.619	437.284	440.899
b1121	ycfz, eck1107, jw1107	predicted inner membrane protein	0.011	0.019	0.037	0.057	0.109	0.0153217	0.0213416	0.0321064	0.039995	0.0638668
b1122	ymfa, eck1108, jw5164	predicted inner membrane protein	0.015	0.03	0.065	0.105	0.177	0.0207801	0.0331163	0.0565319	0.0742791	0.104062
b1123	potd, eck1109, jw1109	polyamine transporter subunit	0.619	1.012	1.553	2.034	2.81	0.861692	1.1159	1.35615	1.43963	1.64987	1	1.29501	1.57382	1.6707	1.91469	3420	3697	5188.5	5520.5	5428	4711.39	4067.31	4238.78	3790.11	3209.51	1	0.863292	0.899688	0.804458	0.681223											5467.6	3644.88	3125.6	2632.7	1945.31
b1124	potc, eck1110, jw1110	polyamine transporter subunit	0.236	0.421	0.664	1.065	2.226	0.328599	0.463872	0.579833	0.753951	1.30719	1	1.41166	1.76456	2.29444	3.97806
b1125	potb, eck1111, jw1111	polyamine transporter subunit	0.156	0.275	0.517	0.844	1.703	0.217866	0.303199	0.451408	0.597562	0.999683	1	1.39168	2.07195	2.7428	4.58853
b1126	pota, eck1112, jw1112	polyamine transporter subunit	0.124	0.119	0.556	0.812	1.563	0.173129	0.131729	0.48516	0.574709	0.917871	1	0.760873	2.8023	3.31953	5.30165	153.5	214	306.5	343	447.5	211.462	235.435	250.397	235.488	264.601	1	1.11337	1.18413	1.11362	1.2513											1221.41	1787.26	516.113	409.751	288.277
b1127	pept, eck1113, jw1113	peptidase t	0.182	0.269	0.451	0.579	0.628	0.253608	0.296082	0.394061	0.409902	0.368507	1	1.16748	1.55382	1.61628	1.45306	422.5	432	553.5	565.5	423.5	582.036	475.271	452.186	388.246	250.41	1	0.816566	0.776904	0.667048	0.430231											2295.02	1605.2	1147.5	947.168	679.526
b1128	ycfd, eck1114, jw1114	conserved protein	0.288	0.295	0.635	0.765	1.002	0.401671	0.324783	0.554864	0.541624	0.588106	1	0.80858	1.38139	1.34843	1.46415	611.5	656	804.5	865.5	1027.5	842.402	721.708	657.242	594.211	607.548	1	0.856726	0.7802	0.705377	0.721209											2097.24	2222.12	1184.51	1097.09	1033.06
b1129	phoq, eck1115, jw1115	sensory histidine kinase in two-compoent regulatory system with phop	0.085	0.181	0.257	0.327	0.502	0.118738	0.199677	0.224745	0.231264	0.294952	1	1.68166	1.89277	1.94768	2.48405
b1130	phop, eck1116, jw1116	dna-binding response regulator in two-component regulatory system	0.493	0.664	1.281	1.614	1.805	0.687122	0.731746	1.11851	1.1425	1.05997	1	1.06494	1.62782	1.66273	1.54262	983	1422	1733.5	1939.5	2051.5	1354.18	1564.43	1416.2	1331.57	1213.03	1	1.15526	1.0458	0.983303	0.895764											1970.8	2137.95	1266.14	1165.49	1144.4
b1131	purb, ade, eck1117, jw1117	adenylosuccinate lyase (ec:4,3,2,2)	0.372	0.318	1.217	1.943	3.638	0.518026	0.350665	1.0628	1.37527	2.13607	1	0.676926	2.05164	2.65482	4.12347	1000.5	1269.5	2011	2638.5	3757	1378.29	1396.66	1642.9	1811.47	2221.47	1	1.01333	1.19199	1.31429	1.61176	0.0219918	0.0473323	0.0786433	0.112794	0.14486	1	2.15227	3.57602	5.12889	6.58699	2660.65	3982.88	1545.82	1317.18	1039.98	0.800454	1.70013
b1132	hfld, eck1118, hslz, jw5165, ycfc	predicted lysogenization regulator	0.355	0.379	0.861	1.209	1.916	0.493815	0.417509	0.75217	0.855901	1.12491	1	0.845477	1.52318	1.73324	2.278
b1133	mnma, asue, eck1119, jw1119, trmu, ycfb	trna (5-methylaminomethyl-2-thiouridylate)-methyltransferase	0.387	0.355	0.845	1.208	2.03	0.539061	0.391752	0.737624	0.854692	1.192	1	0.72673	1.36835	1.58552	2.21126	100.5	171	182	177.5	251	138.449	188.128	148.686	121.863	148.413	1	1.35883	1.07394	0.880204	1.07197											256.833	480.223	201.575	142.581	124.507
b1134	nudj, eck1120, jw1120, ymfb	bifunctional thiamin pyrimidine pyrophosphate hydrolase/thiamin	0.088	0.158	0.261	0.41	0.749	0.122067	0.174656	0.228309	0.290214	0.43992	1	1.43081	1.87035	2.37749	3.60391
b1135	rlue, eck1121, jw1121, ymfc	16s rna u516 pseudouridine synthase (ec:4,2,1,70)	0.088	0.11	0.234	0.363	0.611	0.122727	0.121184	0.204164	0.256832	0.358819	1	0.987427	1.66356	2.09272	2.92372
b1136	icd, eck1122, icda, icde, jw1122	e14 prophage; isocitrate dehydrogenase, specific for nadp+	2.102	5.741	7.519	10.707	12.516	2.92717	6.33013	6.56507	7.57737	7.34904	1	2.16254	2.24281	2.58864	2.51063	8613	15632	22049	21314	23277.5	11865.3	17197.8	18013.1	14633.2	13763.7	1	1.44942	1.51814	1.23328	1.16	1.39943	2.45686	3.02046	3.16887	3.21147	1	1.75562	2.15835	2.26441	2.29485	4053.49	2716.81	2743.78	1931.17	1872.85	5.91681	7.16676
b1137	ymfd, eck1123, jw1123	e14 prophage; predicted sam-dependent methyltransferase	0.014	0.051	0.118	0.148	0.149	0.0200902	0.0561727	0.103177	0.104657	0.0875491
b1138	ymfe, eck1124, jw5166	e14 prophage; predicted inner membrane protein	0.018	0.049	0.141	0.183	0.173	0.0247066	0.054458	0.123486	0.129621	0.101543
b1139	lit, eck1125, jw1125	e14 prophage; cell death peptidase, inhibitor of t4 late gene	0.023	0.072	0.164	0.22	0.409	0.0322033	0.0792364	0.142972	0.155478	0.240052
b1140	inte, eck1126, int, jw1126, ycfi	e14 prophage; predicted integrase	0.021	0.049	0.093	0.113	0.139	0.0290558	0.0539649	0.0812292	0.0799991	0.0814563
b1141	xise, eck1127, jw1127, vxis, ymfg	e14 prophage; predicted excisionase	0.016	0.047	0.08	0.094	0.142	0.0229678	0.0517572	0.0694239	0.0667636	0.0832432
b1143	ymfi, eck1129, jw5168	e14 prophage; predicted protein	0.047	0.098	0.32	0.411	0.657	0.0658458	0.107687	0.279079	0.29081	0.385731	1	1.63544	4.23837	4.41653	5.85809
b1144	ymfj, eck1130	e14 prophage; predicted protein	0.016	0.061	0.08	0.113	0.17	0.0222472	0.0667258	0.0702471	0.0799991	0.0997562
b1145	cohe, eck1131, jw1131, ymfk	e14 prophage; repressor protein phage e14	0.11	0.115	0.383	0.455	0.578	0.15352	0.127314	0.334787	0.322089	0.339442	1	0.829301	2.18075	2.09803	2.21107
b1146	croe, eck4469, ymft	e14 prophage; predicted dna-binding transcriptional regulator	0.199	0.3	0.3	0.528	0.764	0.276696	0.33067	0.262342	0.373515	0.448887	1	1.19507	0.948123	1.34991	1.62231
b1147	ymfl, eck1133, jw1133	e14 prophage; predicted dna-binding transcriptional regulator	0.019	0.053	0.081	0.108	0.138	0.0270462	0.0586307	0.0707987	0.0760835	0.0810903
b1148	ymfm, eck1134, jw1134	e14 prophage; predicted protein	0.02	0.043	0.074	0.087	0.12	0.0277362	0.0473417	0.0644845	0.0616481	0.0703256
b1150	ymfr, eck1136, jw1136	e14 prophage; predicted protein	0.329	0.418	0.38	0.787	0.615	0.458762	0.461053	0.332178	0.557115	0.361155	1	1.005	0.724075	1.21439	0.787239
b1151	beee, eck1137, jw1137, ymfo	pseudogene	0.029	0.036	0.048	0.066	0.089	0.040389	0.0399825	0.0422569	0.0466173	0.0523917
b1152	jaye, eck1138, jw5170, ymfp	pseudogene	0.678	0.639	0.901	1.294	2.583	0.94406	0.704031	0.786467	0.915447	1.51674	1	0.745748	0.833068	0.969691	1.60662
b1153	ymfq, eck1139, jw1139	prohage e14 tail protein homolog	0.16	0.181	0.176	0.296	0.472	0.223114	0.199434	0.153394	0.209313	0.277007	1	0.893867	0.687517	0.938145	1.24155
b1154	stfp, eck1140, jw1140, ycfk	e14 prophage; predicted protein	0.041	0.077	0.092	0.134	0.191	0.0571806	0.0846307	0.0806776	0.0950299	0.111953	1	1.48006		1.66193	1.95788
b1155	tfap, eck1141, jw5171, ymfs	e14 prophage; predicted protein	0.014	0.036	0.056	0.083	0.104	0.020118	0.0397396	0.0488429	0.0586437	0.0610034
b1156	tfae, eck1142, jw1142, ycfa	e14 prophage; predicted tail fiber assembly protein	0.017	0.02	0.041	0.049	0.065	0.0232673	0.0215845	0.0362226	0.0345818	0.0383976
b1157	stfe, eck1143, jw5172, ycfe	pseudogene	0.148	0.209	0.223	0.378	0.557	0.205664	0.230585	0.194556	0.267659	0.326891	1	1.12118	0.945993	1.30144	1.58944
b1158	pine, eck1144, jw1144, pin	e14 prophage; site-specific dna recombinase	0.065	0.126	0.136	0.204	0.318	0.0904921	0.138846	0.119098	0.144354	0.18695	1	1.53434	1.31612	1.59521	2.06593
b1159	mcra, eck1145, jw1145, rgla	e14 prophage; 5-methylcytosine-specific restriction endonuclease b	0.073	0.158	0.183	0.328	0.347	0.102337	0.174413	0.15998	0.231868	0.203808	1	1.7043	1.56327	2.26573	1.99153
b1160	iram, eck1147, elb1, elba, jw1147, ycgw	predicted protein	0.008	0.019	0.069	0.034	0.053	0.0105542	0.0213416	0.0598249	0.0237552	0.0312176
b1161	ycgx, eck1148, jw1148	predicted protein	0.497	0.653	0.953	1.446	2.083	0.69171	0.719486	0.831745	1.02311	1.22322	1	1.04016	1.20245	1.4791	1.7684
b1162	ycge, eck1149, jw1149	predicted dna-binding transcriptional regulator	0.203	0.239	0.485	0.724	0.738	0.283203	0.263459	0.423146	0.512456	0.433461	1	0.930285	1.49415	1.8095	1.53057
b1163	ycgf, eck1150, jw1150	predicted fad-binding phosphodiesterase	0.058	0.186	0.223	0.27	0.532	0.0814383	0.204585	0.194836	0.190971	0.312531	1	2.51215	2.39244	2.34498	3.83764
b1164	ycgz, eck1151, jw1151	predicted protein	0.047	0.031	0.109	0.163	0.143	0.0650812	0.0342202	0.0950843	0.115032	0.0839645	1		1.46101	1.76751
b1165	ymga, eck1152, jw1152	predicted protein	0.07	0.035	0.131	0.187	0.174	0.0969084	0.0390037	0.11443	0.132327	0.101909	1		1.18081	1.36549
b1166	arir, eck1153, jw1153, ymgb	predicted protein	0.021	0.024	0.08	0.103	0.123	0.0296261	0.0262502	0.0697038	0.0727814	0.0721233
b1167	ymgc, eck1154, jw1154	predicted protein	0.01	0.012	0.05	0.059	0.065	0.0136432	0.0137396	0.0436318	0.0415017	0.0383976
b1168	ycgg, eck1155, jw5174	conserved inner membrane protein	0.023	0.042	0.053	0.082	0.139	0.0314243	0.04612	0.0461015	0.058346	0.0818115
b1171	ymgd, eck1158, jw5177	predicted protein	0.063	0.117	0.19	0.275	0.521	0.0877044	0.129279	0.165743	0.19458	0.305717	1	1.47403	1.88979	2.21859	3.48576
b1172	ymgg, eck4470	predicted protein	0.314	0.396	0.495	0.829	1.389	0.437023	0.4364	0.432201	0.586437	0.815607	1	0.998575	0.988968	1.34189	1.86628
b1174	mine, eck1162, jw1163, minb	cell division topological specificity factor	0.333	0.599	0.931	1.213	1.586	0.463229	0.660119	0.81309	0.858607	0.9315	1	1.42504	1.75527	1.85353	2.01089	1444	1416	1735	2075	2249	1989.25	1557.83	1417.42	1424.6	1329.8	1	0.783124	0.712539	0.716147	0.668494											4294.32	2359.93	1743.25	1659.2	1427.6
b1175	mind, eck1163, jw1164, minb	membrane atpase of the minc-mind-mine system	0.691	0.957	1.66	2.19	2.576	0.961991	1.05531	1.44946	1.5497	1.51279	1	1.097	1.50673	1.61093	1.57256	2164	2626.5	3088.5	2948	2813	2981.13	2889.58	2523.17	2023.96	1663.29	1	0.969292	0.846383	0.678924	0.557941											3098.91	2738.14	1740.77	1306.03	1099.48
b1176	minc, eck1164, jw1165, minb	cell division inhibitor	0.872	0.913	1.544	2.262	2.994	1.21431	1.00698	1.34792	1.60082	1.75787	1	0.829262	1.11003	1.3183	1.44763	82	103	148	149	201	112.963	113.317	120.91	102.296	118.849	1	1.00313	1.07035	0.905573	1.0521											93.0267	112.531	89.7011	63.9025	67.6095
b1177	ycgj, eck1165, jw1166	predicted protein	0.16	0.275	0.441	0.648	0.983	0.222154	0.302705	0.384725	0.458928	0.576987	1	1.36259	1.7318	2.06581	2.59724
b1178	ycgk, eck1166, jw1167	predicted protein	0.05	0.093	0.191	0.276	0.323	0.0696247	0.102786	0.167118	0.195175	0.189458	1	1.47628	2.40027	2.80325	2.72114
b1179	ycgl, eck1167, jw1168	conserved protein	0.151	0.139	0.478	0.664	0.758	0.210641	0.153071	0.417655	0.470052	0.444936	1	0.726693	1.98278	2.23153	2.1123	314.5	469.5	612.5	678.5	827.5	433.255	516.527	500.386	465.826	489.29	1	1.1922	1.15495	1.07518	1.12934											2056.84	3374.43	1198.09	991.01	1099.69
b1180	ycgm, eck1168, jw1169	predicted isomerase/hydrolase	0.302	0.359	0.617	0.83	0.871	0.420471	0.396167	0.538671	0.58734	0.511677	1	0.942198	1.28111	1.39686	1.21691	123.5	175.5	156	122	190	170.134	193.079	127.445	83.7594	112.345	1	1.13487	0.74909	0.492316	0.660332											404.626	487.367	236.592	142.608	219.561
b1181	ycgn, eck1169, jw5180	conserved protein	0.206	0.34	0.422	0.552	0.645	0.287281	0.375319	0.368812	0.39036	0.378917	1	1.30645	1.2838	1.35881	1.31898
b1182	hlye, clya, eck1170, hpr, jw5181, shea, ycgd	hemolysin e	0.036	0.057	0.077	0.113	0.134	0.049504	0.062796	0.0675057	0.0796923	0.0785821						157					216.283					1
b1183	umud, eck1171, jw1172	dna polymerase v, subunit d (ec:3,4,21,-)	0.038	0.104	0.132	0.166	0.236	0.052682	0.115046	0.115525	0.117585	0.138864
b1184	umuc, eck1172, jw1173, uvm	dna polymerase v, subunit c	0.042	0.072	0.117	0.165	0.246	0.0589194	0.0794792	0.10181	0.11699	0.144602	1	1.34895	1.72796	1.98559	2.45423
b1185	dsbb, dsbx, eck1173, iarb, jw5182, roxb, ycga	oxidoreductase that catalyzes reoxidation of dsba protein disulfide	0.105	0.129	0.322	0.395	0.459	0.146114	0.142768	0.281277	0.279685	0.269472	1	0.977103	1.92505	1.91416	1.84426
b1186	nhab, eck1174, jw1175	sodium:proton antiporter	0.073	0.112	0.258	0.343	0.504	0.101017	0.123392	0.225016	0.242695	0.296029	1	1.22149	2.2275	2.4025	2.93047
b1187	fadr, dec, eck1175, jw1176, ole, oler, thdb	dna-binding transcriptional dual regulator of fatty acid metabolism	0.169	0.315	0.371	0.437	0.727	0.235288	0.347597	0.324085	0.309161	0.427002	1	1.47732	1.3774	1.31397	1.81481	185	251.5	274.5	304.5	348	254.856	276.691	224.255	209.055	205.768	1	1.08568	0.879928	0.820288	0.807389											1083.17	796.013	691.962	676.203	481.89
b1188	ycgb, eck1176, jw1177	conserved protein	0.497	1.001	0.586	0.699	0.672	0.692071	1.10339	0.511784	0.494412	0.394342	1	1.59432	0.739497	0.714395	0.569801	54.5	47.5	75	74.5	67	75.0792	52.2578	61.2718	51.1482	39.6162	1	0.696036	0.816096	0.681257	0.52766											108.485	47.3613	119.722	103.453	100.462
b1189	dada, dadr, eck1177, jw1178	d-amino acid dehydrogenase (ec:1,4,99,1)	0.723	1.431	1.247	1.544	1.077	1.00742	1.57757	1.08888	1.09258	0.632608	1	1.56595	1.08086	1.08453	0.627951	229.5	410	553.5	582	350	316.159	451.067	452.186	399.574	206.951	1	1.42671	1.43025	1.26384	0.654577											313.832	285.926	415.278	365.716	327.139
b1190	dadx, alnb, dadb, eck1178, jw1179	alanine racemase 2, plp-binding (ec:5,1,1,1)	0.34	0.663	0.689	0.774	0.484	0.473605	0.73126	0.601237	0.54794	0.284187	1	1.54403	1.26949	1.15696	0.600052	47	56.5	54.5	39.5	23	64.7472	62.1593	44.5242	27.1188	13.5996	1	0.960031	0.687662	0.418842	0.210042											136.711	85.0029	74.0542	49.4923	47.8544
b1191	cvra, eck1179, jw5184, ycgo	predicted cation/proton antiporter	0.054	0.139	0.163	0.242	0.361	0.0755904	0.153071	0.142421	0.17142	0.211709	1	2.02501	1.88411	2.26775	2.80074
b1192	ldca, eck1180, jw1181, ycgq	l,d-carboxypeptidase a (ec:3,4,17,13)	0.11	0.125	0.298	0.395	0.517	0.15328	0.13811	0.259872	0.279388	0.303564	1	0.901028	1.69541	1.82272	1.98045	58	74	86	77	104	79.9008	81.4121	70.2583	52.8646	61.4939	1	1.01892	0.87932	0.661628	0.769628											521.272	589.474	270.357	189.216	202.573
b1193	emta, eck1181, jw5821, mlte, sltz, ycgp	lytic murein endotransglycosylase e (ec:3,2,1,-)	0.157	0.162	0.441	0.597	0.773	0.219276	0.178828	0.384725	0.422839	0.453914	1	0.815538	1.75452	1.92834	2.07005
b1194	ycgr, eck1182, jw1183	protein involved in flagellar function	0.37	0.541	1.405	2.128	1.552	0.515042	0.596587	1.2269	1.50579	0.911047	1	1.15833	2.38214	2.92363	1.76888
b1195	ymge, eck1183, jw1184, tag	predicted inner membrane protein	0.335	0.551	0.56	0.695	0.66	0.466228	0.607869	0.488593	0.491705	0.387528	1	1.3038	1.04797	1.05465	0.8312
b1196	ycgy, eck1184, jw1185	predicted protein	0.753	0.813	0.698	1.21	1.155	1.04826	0.896592	0.60975	0.856198	0.678174	1	0.855318	0.58168	0.816784	0.646955
b1197	trea, eck1185, jw1186, osma	periplasmic trehalase (ec:3,2,1,28)	0.448	0.452	0.449	0.484	0.576	0.624517	0.498217	0.392414	0.34284	0.338366	1	0.797764	0.628349	0.548969	0.541805	1261	796.5	564.5	437.5	398	1737.15	876.281	461.172	300.367	235.332	1	0.504435	0.265476	0.172908	0.13547											2781.6	1758.83	1175.22	876.113	695.496
b1198	dham, dhah, eck1186, jw5185, ptsd, ycgc	fused predicted dihydroxyacetone-specific pts enzymes: hpr	0.081	0.197	0.324	0.554	0.829	0.113011	0.216853	0.282643	0.392164	0.486563	1	1.91887	2.50103	3.47014	4.30545	45			157		61.992			107.789		1			1.73875												548.548			274.856
b1199	dhal, dhak2, eck1187, jw5186, ptsd, ycgs	dihydroxyacetone kinase, c-terminal domain	0.264	0.402	0.62	0.939	0.989	0.367159	0.44278	0.541692	0.664325	0.580937	1	1.20596	1.47536	1.80936	1.58225	236.5	205	227.5	285.5	351.5	325.802	225.534	185.858	196.011	207.837	1	0.692241	0.570462	0.601625	0.637925											887.359	509.358	343.106	295.053	357.762
b1200	dhak, dhak1, eck1188, jw5187, ptsd, ycgt	dihydroxyacetone kinase, n-terminal domain	0.278	0.405	0.577	0.913	0.978	0.386798	0.44621	0.503552	0.645983	0.574478	1	1.1536	1.30185	1.67008	1.48522	1307	1345	1196	1237.5	935	1800.52	1479.72	977.081	849.609	552.854	1	0.821829	0.542665	0.471868	0.307052											4654.94	3316.2	1940.38	1315.22	962.357
b1201	dhar, eck1189, jw5188, ptsd, ycgu	predicted dna-binding transcriptional regulator, dihydroxyacetone	0.038	0.069	0.131	0.175	0.236	0.0529528	0.0760425	0.11443	0.123901	0.138864
b1202	ycgv, eck1190, jw1193	predicted adhesin	0.031	0.061	0.086	0.108	0.141	0.0437775	0.0669686	0.0754665	0.0760835	0.082888
b1203	ychf, eck1191, engd, gtp1, jw1194	predicted gtp-binding protein	0.217	0.168	0.828	1.271	2.248	0.302094	0.184716	0.722805	0.899207	1.31975	1	0.611452	2.39265	2.97658	4.36868	442	737	1181	1416.5	1943	608.899	810.821	964.827	972.502	1148.87	1	1.33162	1.58454	1.59715	1.8868											2015.6	4389.56	1334.84	1081.51	870.522
b1204	pth, eck1192, jw1195, rap	peptidyl-trna hydrolase (ec:3,1,1,29)	0.144	0.094	0.45	0.721	0.926	0.200176	0.103271	0.392958	0.510047	0.543971	1	0.515904	1.96306	2.548	2.71747
b1205	ychh, eck1193, jw1196	predicted inner membrane protein	1.097	2.632	0.956	1.277	2.543	1.52774	2.90197	0.834494	0.904016	1.49306	1	1.89952	0.54623	0.591736	0.977303
b1206	ychm, eck1194, jw5189	predicted transporter	0.074	0.139	0.164	0.209	0.288	0.103507	0.152828	0.143516	0.14826	0.169361	1	1.47651	1.38654	1.43238	1.63623
b1207	prs, dnar, eck1195, jw1198, prsa	phosphoribosylpyrophosphate synthase (ec:2,7,6,1)	0.96	0.975	2.277	3.186	4.436	1.33713	1.07542	1.9884	2.25463	2.6047	1	0.804277	1.48707	1.68617	1.94798	2038.5	2977	4038.5	4412	5406.5	2808.24	3275.19	3299.28	3029.07	3196.79	1	1.16628	1.17486	1.07864	1.13836											2100.2	3045.5	1659.27	1343.49	1227.32
b1208	ispe, eck1196, ipk, jw1199, ychb	4-diphosphocytidyl-2-c-methylerythritol kinase (ec:2,7,1,148)	0.787	0.774	1.603	2.268	3.119	1.09617	0.85293	1.39978	1.60503	1.83143	1	0.778099	1.27697	1.46422	1.67075
b1209	lolb, eck1197, hemm, jw1200, ychc	chaperone for lipoproteins	0.263	0.349	0.773	1.041	1.61	0.366499	0.384886	0.675329	0.736809	0.945138	1	1.05017	1.84265	2.0104	2.57883	75	84	131	135	175	103.32	92.4138	107.021	92.6846	103.475	1	0.894443	1.03583	0.897064	1.0015											281.91	240.107	158.473	125.792	109.482
b1210	hema, eck1198, gtra, jw1201	glutamyl trna reductase (ec:1,2,1,-)	0.105	0.148	0.327	0.456	0.618	0.146714	0.162638	0.285936	0.322387	0.36277	1	1.10854	1.94894	2.19739	2.47263
b1211	prfa, eck1199, jw1202, sueb, uar	peptide chain release factor rf-1	0.092	0.181	0.337	0.459	0.845	0.127555	0.199191	0.293897	0.325094	0.495896	1	1.56161	2.30409	2.54866	3.88772
b1212	prmc, eck1200, hemk, jw1203	n5-glutamine methyltransferase, modifies release factors rf-1 and	0.036	0.065	0.114	0.175	0.29	0.0501633	0.071627	0.0993405	0.123603	0.170437
b1213	ychq, eck1201, jw1204	predicted transcriptional regulator	0.162	0.238	0.364	0.583	0.825	0.225153	0.26223	0.317771	0.412608	0.48441	1	1.16467	1.41136	1.83257	2.15147
b1214	ycha, eck1202, jw1205	predicted transcriptional regulator	0.239	0.394	0.588	0.841	1.192	0.332707	0.434192	0.513702	0.595162	0.699704	1	1.30503	1.54401	1.78884	2.10306
b1215	kdsa, eck1203, jw1206	3-deoxy-d-manno-octulosonate 8-phosphate synthase (ec:2,5,1,55)	0.49	0.665	1.466	1.996	2.656	0.682744	0.732975	1.27987	1.41226	1.5598	1	1.07357	1.87459	2.0685	2.28461	1769.5	2208	3021	3452.5	4186.5	2437.66	2429.16	2468.03	2370.32	2475.42	1	0.996513	1.01246	0.972376	1.01549											3570.39	3314.11	1928.35	1678.39	1587.01
b1216	chaa, eck1210, jw1207	calcium/sodium:proton antiporter	0.213	0.309	0.615	0.739	0.871	0.296337	0.340488	0.537305	0.522985	0.511322	1	1.14899	1.81316	1.76483	1.72548
b1217	chab, eck1211, jw1208	predicted cation regulator	0.139	0.204	0.297	0.391	0.595	0.193579	0.225191	0.259321	0.276528	0.349314	1	1.1633	1.33961	1.4285	1.8045	278	115	145	167	218	382.973	126.519	118.459	114.654	128.901	1	0.33036	0.309314	0.29938	0.336579											1978.38	561.829	456.804	414.621	369.011
b1218	chac, eck1212, jw1209	regulatory protein for cation transport	0.248	0.234	0.349	0.421	0.536	0.3456	0.257814	0.304599	0.29773	0.314684	1	0.74599	0.881362	0.861486	0.910542
b1219	ychn, eck1213, jw1210	conserved protein	0.415	0.552	0.543	0.588	0.832	0.57816	0.608848	0.473915	0.416217	0.488716	1	1.05308	0.819695	0.719899	0.845296	2416	2270.5	1749	1449	1474.5	3328.28	2497.92	1428.86	994.815	871.853	1	0.750514	0.429308	0.298898	0.261953											5756.68	4102.71	3015.01	2390.13	1783.97
b1220	ycho, eck1214, jw1211, ychp	predicted invasin	0.139	0.255	0.244	0.361	0.565	0.19352	0.281121	0.212668	0.255624	0.331552	1	1.45267	1.09894	1.32092	1.71327
b1221	narl, eck1215, frdr, jw1212	dna-binding response regulator in two-component regulatory system	0.195	0.38	0.722	1.073	1.34	0.27121	0.418738	0.630051	0.759057	0.786898	1	1.54396	2.32311	2.79878	2.90143	430.5	586.5	1056.5	1191	1232.5	593.057	645.246	863.115	817.684	728.761	1	1.088	1.45537	1.37876	1.22882											2186.71	1540.93	1369.91	1077.24	926.12
b1222	narx, eck1216, frdr, jw1213, narr	sensory histidine kinase in two-component regulatory system with	0.062	0.099	0.233	0.311	0.407	0.0858163	0.109652	0.20334	0.22014	0.238976	1	1.27775	2.36949	2.56524	2.78474
b1223	nark, eck1217, jw1214	nitrate/nitrite transporter	0.028	0.032	0.045	0.065	0.098	0.0385899	0.0350813	0.038964	0.0463105	0.057774
b1224	narg, chlc, eck1218, jw1215, narc	nitrate reductase 1, alpha subunit (ec:1,7,99,4)	0.026	0.036	0.052	0.068	0.098	0.0358913	0.0402327	0.0452782	0.0478172	0.057408
b1225	narh, chlc, eck1219, jw1216	nitrate reductase 1, beta (fe-s) subunit (ec:1,7,99,4)	0.033	0.051	0.077	0.093	0.126	0.0465355	0.0564229	0.0669542	0.0655637	0.073921
b1226	narj, eck1220, jw1217	molybdenum-cofactor-assembly chaperone subunit (delta subunit) of	0.054	0.095	0.105	0.164	0.261	0.0745712	0.1045	0.0919313	0.116088	0.153214	1	1.40135	1.2328	1.55673	2.05459
b1227	nari, chli, eck1221, jw1218	nitrate reductase 1, gamma (cytochrome b(nr)) subunit (ec:1,7,99,4)	0.061	0.081	0.091	0.131	0.173	0.0853953	0.0890462	0.0798544	0.0929278	0.101543	1	1.04275		1.08821
b1229	tpr, eck1224, jw1219	predicted protamine-like protein	0.11	0.037	0.128	0.209	0.244	0.15364	0.0404755	0.111961	0.147963	0.14317	1		0.728721	0.963047	0.931854
b1232	puru, eck1227, jw1220, tgs, ychi	formyltetrahydrofolate hydrolase (ec:3,5,1,10)	0.407	0.457	1.424	2.271	4.089	0.566885	0.504104	1.24337	1.60714	2.40088	1	0.889253	2.19333	2.83503	4.23521	374	603	710	1219	1501	515.222	663.399	580.04	836.908	887.522	1	1.2876	1.1258	1.62436	1.7226											908.865	1316	466.508	520.745	369.666
b1233	ychj, eck1228, jw1221	conserved protein	0.121	0.164	0.51	0.804	1.457	0.168633	0.1803	0.445645	0.568998	0.855436	1	1.06919	2.6427	3.37418	5.07278
b1234	rssa, eck1229, jw1222, ychk	conserved protein	0.274	0.477	0.598	0.787	1.212	0.38221	0.526425	0.521935	0.556664	0.711545	1	1.37732	1.36557	1.45643	1.86166
b1235	rssb, eck1230, hnr, jw1223, mvia, spre, vera, ychl	response regulator of rpos	0.208	0.299	0.416	0.524	0.715	0.290279	0.330185	0.363321	0.370511	0.419822	1	1.13747	1.25163	1.2764	1.44627
b1236	galu, eck1231, jw1224, vera, ychd	glucose-1-phosphate uridylyltransferase (ec:2,7,7,9)	0.265	0.306	0.818	1.074	1.682	0.369289	0.337787	0.714301	0.760266	0.987842	1	0.914696	1.93426	2.05873	2.67499	1216.5	1347	1781.5	2067	2574.5	1675.85	1481.92	1455.41	1419.1	1522.27	1	0.88428	0.868461	0.846797	0.908356											4538.05	4387.15	2037.53	1866.59	1541
b1237	hns, b1, bgly, cur, drc, drdx, drs, eck1232, fimg, h1, hnsa, irk,	global dna-binding transcriptional dual regulator h-ns	1.744	2.048	3.872	4.949	7.212	2.42865	2.2578	3.38105	3.50268	4.23482	1	0.929653	1.39215	1.44224	1.7437	19028.5	22353	26057.5	26210.5	26307.5	26213.7	24592	21287.9	17994.9	15555.3	1	0.938136	0.812091	0.68647	0.593404											10793.5	10892	6296.23	5137.46	3673.19
b1238	tdk, eck1233, jw1226	thymidine kinase/deoxyuridine kinase (ec:2,7,1,21)	0.056	0.045	0.307	0.451	0.757	0.077958	0.0493066	0.267825	0.319085	0.444226	1		3.4355	4.09304	5.69827
b1241	adhe, adhc, ana, eck1235, jw1228	fused acetaldehyde-coa dehydrogenase/iron-dependent alcohol	1.322	1.566	2.705	3.541	4.36	1.84077	1.72671	2.36161	2.50605	2.55984	1	0.938034	1.28294	1.36141	1.39063	5506.5	6757	9433	10922.5	10181.5	7585.75	7433.81	7706.36	7498.87	6020.19	1	0.97997	1.0159	0.988547	0.793618											4120.96	4305.19	3263.19	2992.31	2351.78
b1242	yche, eck1236, jw1229	predicted inner membrane protein	0.033	0.082	0.139	0.185	0.245	0.0455766	0.0900249	0.121568	0.130821	0.143891
b1243	oppa, eck1237, jw1235	oligopeptide transporter subunit	1.016	2.242	3.201	4.771	7.469	1.41487	2.47195	2.79463	3.37668	4.38553	1	1.74712	1.97518	2.38656	3.09959	6255.5	8227.5	12691.5	13650	15969.5	8617.57	9051.6	10368.4	9371.45	9442.56	1	1.05037	1.20317	1.08748	1.09573											6090.7	3661.72	3710.12	2775.34	2153.12
b1244	oppb, eck1238, jw1236, stkb	oligopeptide transporter subunit	0.237	0.59	0.901	1.46	2.662	0.329769	0.650059	0.786747	1.03303	1.56303	1	1.97126	2.38575	3.1326	4.73978
b1245	oppc, eck1239, jw1237, stkb	oligopeptide transporter subunit	0.228	0.649	0.88	1.366	2.599	0.317385	0.715556	0.768355	0.966873	1.52608	1	2.25454	2.4209	3.04637	4.80828
b1246	oppd, eck1240, jw1238	oligopeptide transporter subunit	0.192	0.627	0.824	1.249	2.117	0.267161	0.691028	0.719784	0.883869	1.24296	1	2.58656	2.69419	3.30838	4.65249
b1247	oppf, eck1241, jw1239	oligopeptide transporter subunit	0.11	0.372	0.492	0.685	1.105	0.152891	0.41015	0.430003	0.484487	0.64911	1	2.68263	2.81249	3.16885	4.24558
b1248	yciu, eck1242, jw1240	predicted protein	0.113	0.233	0.386	0.55	0.733	0.157658	0.257329	0.336705	0.389458	0.430232	1	1.63219	2.13567	2.47026	2.72889
b1249	cls, eck1243, jw1241, nov, ycij	cardiolipin synthase 1 (ec:2,7,8,-)	0.524	0.637	0.914	1.371	1.469	0.729701	0.701824	0.798272	0.970175	0.862606	1	0.961797	1.09397	1.32955	1.18214
b1250	kch, eck1244, jw1242	voltage-gated potassium channel	0.024	0.045	0.144	0.215	0.306	0.0338521	0.0500425	0.125404	0.151869	0.17977
b1251	ycii, eck1245, jw1243	predicted enzyme	0.295	0.321	1.076	1.25	1.504	0.410307	0.35447	0.939318	0.884772	0.883058	1	0.863913	2.2893	2.15636	2.15219	2119.5	3623	5243.5	5350.5	5320	2919.82	3985.89	4283.72	3673.4	3145.65	1	1.36512	1.46712	1.25809	1.07734											7116.18	11244.7	4560.45	4151.81	3562.22
b1252	tonb, eck1246, exba, jw5195, t1rec	membrane spanning protein in tonb-exbb-exbd complex	0.336	0.27	0.602	0.816	1.086	0.467877	0.297311	0.525499	0.577415	0.637624	1	0.635447	1.12316	1.23412	1.3628
b1253	ycia, eck1247, jw1245	predicted hydrolase	0.121	0.105	0.311	0.478	0.7	0.169172	0.116032	0.271669	0.338329	0.410855	1	0.685882	1.60587	1.99991	2.42862
b1254	ycib, eck1248, ispa, jw1246	predicted inner membrane protein	0.167	0.252	0.443	0.645	1.037	0.232829	0.278177	0.386372	0.456817	0.608925	1	1.19477	1.65947	1.96203	2.61534
b1255	ycic, eck1249, jw1247	predicted inner membrane protein	0.113	0.169	0.315	0.463	0.731	0.157059	0.186187	0.274691	0.3278	0.429155	1	1.18546	1.74896	2.08711	2.73244
b1256	ompw, eck1250, jw1248, ycid	outer membrane protein w	0.248	0.376	0.475	0.447	0.733	0.345032	0.414815	0.414642	0.316378	0.430587	1	1.20225	1.20175	0.916954	1.24796
b1257	ycie, eck1251, jw1249	conserved protein	0.117	0.066	0.244	0.282	0.357	0.162725	0.072856	0.213219	0.199686	0.209556	1		1.3103	1.22714	1.28779	928.5	564	462	321	285.5	1279.1	620.493	377.434	220.383	168.812	1	0.4851	0.295078	0.172296	0.131977											7860.49		1770.17	1103.65	805.573
b1258	ycif, eck1252, jw1250	conserved protein	0.209	0.081	0.293	0.373	0.476	0.291688	0.0897821	0.255756	0.263743	0.279526	1	0.307802	0.876815	0.904198	0.958306	1313	1485	1107	1043	740	1808.79	1633.74	904.372	716.075	437.553	1	0.903226	0.499988	0.395886	0.241904											6201.11	18196.8	3536.07	2715.04	1565.34
b1259	ycig, eck1253, jw1251	predicted protein	0.634	0.277	0.52	0.632	0.801	0.883071	0.305406	0.454429	0.447046	0.470416	1	0.345846	0.514601	0.50624	0.532705	385.5					531.065																				601.384
b1260	trpa																	1236	1863	3049.5	3504.5	5359	1702.71	2049.61	2491.31	2406.02	3168.71	1	1.20373	1.46314	1.41305	1.86098	0.00594	0.01134	0.01674	0.0216	0.02592	1	1.90909	2.81818	3.63636	4.36364						0.175009	0.277561
b1261	trpb, eck1255, jw1253	tryptophan synthase, beta subunit (ec:4,2,1,20)	0.452	1.375	1.629	3.086	4.349	0.629583	1.51599	1.42256	2.18425	2.55338	1	2.40793	2.25953	3.46937	4.05567	921.5	1386	1981.5	2799	3349	1269.46	1524.83	1618.8	1921.66	1980.22	1	1.20116	1.27519	1.51377	1.55989	0.00594	0.01134	0.01674	0.0216	0.02592	1	1.90909	2.81818	3.63636	4.36364	2016.35	1005.83	1137.95	879.779	775.529	0.234738	0.373085
b1262	trpc, eck1256, jw1254, trpf	fused indole-3-glycerolphosphate	0.372	0.879	1.091	1.894	3.45	0.51819	0.969698	0.95249	1.34069	2.02556	1	1.87132	1.83811	2.58725	3.90891	347	447	613	873	1262	478.027	491.773	500.795	599.361	746.204	1	1.02876	1.04763	1.25382	1.56101	0.00594	0.01134	0.01674	0.0216	0.02592	1	1.90909	2.81818	3.63636	4.36364	922.494	507.141	525.775	447.055	368.395	0.623375	1.15681
b1263	trpd, eck1257, jw1255, trpgd	fused glutamine amidotransferase (component ii) of anthranilate	0.197	0.478	0.672	1.2	2.16	0.273729	0.526675	0.586419	0.848981	1.26808	1	1.92408	2.14234	3.10154	4.63261	158	171	237	467	537	217.661	188.128	193.619	320.62	317.521	1	0.864318	0.889544	1.47303	1.45879	0.00594	0.01134	0.01674	0.0216	0.02592	1	1.90909	2.81818	3.63636	4.36364	795.17	357.2	330.171	377.653	250.396	1.36906	3.02395
b1264	trpe, anth, eck1258, jw1256, tryd, tryp-4	component i of anthranilate synthase (ec:4,1,3,27)	0.258	0.269	0.789	1.637	2.492	0.359333	0.297068	0.689053	1.15874	1.46327	1	0.826722	1.91759	3.22469	4.0722	66.5	96.5	89	197	214	91.6104	106.166	72.7092	135.251	126.535	1	1.15888	0.793679	1.47637	1.38124	0.00594	0.01134	0.01674	0.0216	0.02592	1	1.90909	2.81818	3.63636	4.36364	254.946	357.378	105.521	116.723	86.4742	3.2528	5.3585
b1266	yciv, eck1260, jw1258, trph	conserved protein	0.257	0.371	0.578	0.808	1.146	0.357984	0.408928	0.504647	0.571704	0.672792	1	1.14231	1.40969	1.59701	1.87939
b1267	ycio, eck1261, jw5196	conserved protein	0.175	0.312	0.474	0.652	1.002	0.243532	0.343674	0.413818	0.461634	0.588106	1	1.41121	1.69923	1.89558	2.4149	460	476	507	527	622.5	633.696	523.678	414.197	361.813	368.076	1	0.826387	0.653622	0.570957	0.580841											2602.1	1523.76	1000.92	783.766	625.867
b1268	yciq, eck1262, jw5197, ycip	predicted inner membrane protein	0.231	0.339	0.288	0.567	0.63	0.321493	0.373847	0.25136	0.401484	0.36995	1	1.16285	0.781853	1.24881	1.15072
b1269	rlub, eck1263, jw1261, ycil	23s rrna pseudouridylate synthase (ec:4,2,1,70)	0.164	0.197	0.512	0.712	1.181	0.228601	0.217339	0.44702	0.503732	0.6936	1	0.950735	1.95546	2.20354	3.03411	90.5	137.5	197	224.5	255	124.673	151.273	160.941	154.131	150.778	1	1.21336	1.2909	1.23629	1.20939											545.373	696.022	360.03	305.979	217.385
b1270	btur, coba, eck1264, jw1262	cob(i)alamin adenolsyltransferase/cobinamide atp-dependent	0.189	0.243	0.465	0.593	0.666	0.263144	0.267632	0.405858	0.419826	0.391113	1	1.01705	1.54234	1.59542	1.48631
b1271	ycik, eck1265, jw1263	predicted oxoacyl-(acyl carrier protein) reductase, emrky-tolc	0.273	0.267	0.617	0.785	0.856	0.380142	0.294368	0.538399	0.555762	0.50271	1	0.774361	1.41631	1.46198	1.32243
b1272	sohb, eck1266, jw1264	predicted inner membrane peptidase	0.223	0.344	0.787	1.035	1.654	0.310399	0.378998	0.686854	0.732298	0.971329	1	1.221	2.21281	2.35921	3.12929	45.5	60.5	96.5	113	138.5	62.6808	66.5599	78.8364	77.5805	81.8933	1	1.06189	1.25774	1.23771	1.30651											201.936	175.621	114.779	105.941	84.3106
b1273	ycin, eck1267, jw1265	predicted protein	0.141	0.243	0.407	0.545	0.758	0.196098	0.268242	0.35564	0.385695	0.445119	1	1.3679	1.81358	1.96685	2.26988	474.5	530	684	763	1020	653.671	583.087	558.799	523.84	603.113	1	0.892019	0.854862	0.801381	0.922655											3333.39	2173.73	1571.25	1358.17	1354.95
b1274	topa, eck1268, jw1266, supx	dna topoisomerase i, omega subunit (ec:5,99,1,2)	0.249	0.484	0.737	0.959	1.358	0.346351	0.534034	0.643774	0.678761	0.797662	1	1.54189	1.85874	1.95975	2.30305	324.5	373.5	481	513.5	637	447.031	410.911	392.956	352.545	376.65	1	0.919201	0.879036	0.788636	0.842559											1290.69	769.448	610.395	519.395	472.192
b1275	cysb, eck1269, jw1267	dna-binding transcriptional dual regulator,	0.222	0.332	0.793	1.131	1.743	0.309649	0.365752	0.692617	0.800261	1.02372	1	1.18118	2.23678	2.58442	3.30607	110.5	152.5	241	264	278.5	152.225	167.775	196.887	181.25	164.673	1	1.10215	1.29339	1.19067	1.08178											491.605	458.713	284.265	226.488	160.858
b1276	acna, acn, eck1271, jw1268	aconitate hydratase 1 (ec:4,2,1,3)	0.623	1.154	1.136	1.355	1.532	0.867058	1.27191	0.991733	0.959051	0.899571	1	1.46693	1.14379	1.1061	1.0375	1457	1718.5	2076	1540.5	1348	2007.16	1890.63	1696	1057.63	797.055	1	0.941943	0.844976	0.52693	0.397105	1.39943	2.45686	3.02046	3.16887	3.21147	1	1.75562	2.15835	2.26441	2.29485	2314.91	1486.45	1710.14	1102.79	886.039	34.977	65.1911
b1277	riba, eck1272, jw1269	gtp cyclohydrolase ii (ec:3,5,4,25)	0.148	0.235	0.49	0.71	1.099	0.206592	0.258801	0.427814	0.502234	0.645525	1	1.25271	2.07081	2.43104	3.12464
b1278	pgpb, eck1273, jw1270	phosphatidylglycerophosphatase b (ec:3,1,3,27)	0.07	0.149	0.189		0.372	0.0979051	0.16411	0.16492		0.218523	1	1.67621	1.68449		2.23199
b1279	ycis, eck1274, jw1271	conserved inner membrane protein	0.346	0.658	0.689	0.906	1.078	0.481339	0.725123	0.601789	0.641174	0.632963	1	1.50647	1.25024	1.33206	1.315	380					523.488																				1087.57
b1280	ycim, eck1275, jw1272	conserved protein	0.28	0.405	0.465	0.749	0.984	0.389887	0.44621	0.405586	0.530202	0.578063	1	1.14446	1.04027	1.35989	1.48264	25	34	34	32	33	34.44	37.4056	27.7765	21.9697	19.5125	1	1.08611	0.80652	0.637912	0.566565											88.3332	83.8296	68.485	41.4364	33.7549
b1281	pyrf, eck1276, jw1273	orotidine-5'-phosphate decarboxylase (ec:4,1,1,23)	0.19	0.244	0.755	1.134	1.711	0.264523	0.269589	0.659416	0.802364	1.0047	1	1.01915	2.49285	3.03325	3.79816	123.5	205.5	362	449.5	719	170.134	226.084	295.739	308.605	425.135	1	1.32886	1.73827	1.8139	2.49883	0.0172367	0.0367123	0.060437	0.0860381	0.110012	1	2.1299	3.5063	4.99157	6.38243	643.172	838.623	448.486	384.621	423.147	5.08252	8.14625
b1282	ycih, eck1277, jw1274	conserved protein	0.172	0.182	0.637	1.132	1.597	0.239936	0.200663	0.556511	0.800866	0.937603	1	0.836319	2.31941	3.33783	3.90772
b1283	osmb, eck1278, jw1275	lipoprotein	0.532	0.715	0.885	1.156	1.887	0.74027	0.788905	0.773023	0.817855	1.10822	1	1.0657	1.04424	1.10481	1.49705
b1284	ycit, deot, eck1279, jw1276	predicted dna-binding transcriptional regulator	0.111	0.186	0.39	0.458	0.606	0.15475	0.205564	0.34055	0.323894	0.355955	1	1.32836	2.20064	2.09301	2.30019	159.5	234	264	297.5	290	219.727	257.438	215.677	204.249	171.473	1	1.17163	0.981566	0.92956	0.780392											1419.88	1252.35	633.319	630.606	481.727
b1285	gmr, eck1280, jw1278, ycir	modulator of rnase ii stability	0.141	0.169	0.277	0.399	0.467	0.196847	0.186187	0.242033	0.282392	0.274499	1	0.945847	1.22955	1.43457	1.39448
b1286	rnb, eck1281, jw1279	ribonuclease ii (ec:3,1,13,1)	0.248	0.411	0.991	1.398	2.572	0.34593	0.453326	0.865498	0.989121	1.51028	1	1.31045	2.50194	2.85931	4.36586	205.5	315	453	620.5	810	283.097	346.552	370.082	426.006	478.943	1	1.22415	1.30726	1.50481	1.6918											818.363	764.465	427.594	430.691	317.121
b1287	yciw, eck1282, jw5200	predicted oxidoreductase	0.26	0.267	0.63	0.869	1.698	0.362602	0.294368	0.550476	0.614704	0.996809	1	0.811821	1.51813	1.69526	2.74905
b1288	fabi, eck1283, envm, gts, jw1281, qmea	enoyl-	0.437	0.449	1.302	1.814	3.055	0.608653	0.495031	1.1369	1.28414	1.79375	1	0.813321	1.86789	2.10981	2.94708	5255.5	6126.5	8079.5	10119.5	15073.5	7239.97	6740.16	6600.61	6947.57	8912.77	1	0.930964	0.911689	0.959613	1.23105	0.215833	0.41454	0.616032	0.80016	0.964627	1	1.92065	2.8542	3.70731	4.46932	11895.1	13615.6	5805.82	5410.27	4968.79	1.49553	3.0854
b1289	ycjd, eck1284, jw1282	conserved protein	0.098	0.218	0.157	0.207	0.306	0.13595	0.240888	0.137481	0.146158	0.179415	1	1.77189	1.01126	1.07509	1.31971
b1290	sapf, eck1285, jw1283	predicted antimicrobial peptide transporter subunit	0.094	0.232	0.261	0.383	0.588	0.130403	0.2561	0.228038	0.270961	0.345191	1	1.9639	1.74871	2.07787	2.6471
b1291	sapd, eck1286, jw1284, trke	predicted antimicrobial peptide transporter subunit	0.103	0.231	0.252	0.331	0.497	0.142875	0.254871	0.220357	0.234575	0.291723	1	1.78387	1.5423	1.64181	2.0418
b1292	sapc, eck1287, jw1285	predicted antimicrobial peptide transporter subunit	0.106	0.201	0.219	0.324	0.475	0.148093	0.222005	0.191543	0.229459	0.278805	1	1.49909	1.2934	1.54943	1.88264
b1293	sapb, eck1288, jw1286	predicted antimicrobial peptide transporter subunit	0.073	0.142	0.19	0.245	0.38	0.102128	0.156751	0.165743	0.173522	0.223184	1	1.53485	1.6229	1.69907	2.18535
b1294	sapa, eck1289, jw1287	predicted antimicrobial peptide transporter subunit	0.11	0.189	0.249	0.364	0.53	0.153789	0.208508	0.217064	0.257735	0.311099	1	1.3558	1.41144	1.67589	2.02289	31		40	48	41	42.7056		32.6783	32.9545	24.2428	1		0.765199	0.771668	0.567672											277.689		150.547	127.862	77.9262
b1295	ymja, eck1290, jw1288	predicted protein	0.119	0.12	0.343	0.445	0.488	0.166144	0.132708	0.299388	0.315169	0.286696	1	0.798756	1.80198	1.89697	1.72559	153					210.773																				1268.62
b1296	puup, eck1291, jw1289, ycjj	putrescine importer	0.09	0.157	0.227	0.235	0.26	0.125544	0.173434	0.197849	0.166611	0.152503	1	1.38146	1.57594	1.32711	1.21474
b1297	puua, eck1292, jw5201, ycjk	gamma-glu-putrescine synthase	0.168	0.559	0.723	0.914	1.034	0.233818	0.616457	0.631154	0.647183	0.607128	1	2.63648	2.69934	2.76789	2.59658
b1298	puud, eck1293, jw1291, ycjl	gamma-glu-gaba hydrolase	0.179	0.743	0.821	1.02	1.058	0.2492	0.819571	0.716491	0.721769	0.621122	1	3.2888	2.87516	2.89634	2.49246
b1299	puur, eck1294, jw1292, ycjc	dna-binding transcriptional repressor	0.17	0.557	0.654	0.851	0.889	0.236967	0.613756	0.571329	0.602379	0.522087	1	2.59005	2.41101	2.54204	2.20321
b1300	puuc, aldh, eck1295, jw1293	gamma-glu-gamma-aminobutyraldehyde dehydrogenase, nad(p)h-dependent	0.129	0.362	0.614	0.937	1.08	0.179277	0.398868	0.536481	0.663125	0.634039	1	2.22487	2.99247	3.69889	3.53665
b1301	puub, eck1296, jw1294, ordl, ycja	gamma-glu-putrescine oxidase, fad/nad(p)-binding	0.074	0.247	0.41	0.565	0.785	0.103596	0.272783	0.357838	0.399977	0.460728	1	2.63313	3.45415	3.86092	4.44733
b1302	puue, eck1297, goag, jw1295	gaba aminotransferase, plp-dependent (ec:2,6,1,19)	0.178	0.333	0.514	0.766	0.997	0.248421	0.366981	0.448395	0.541931	0.585598	1	1.47725	1.80498	2.1815	2.35728
b1303	pspf, eck1298, jw1296, ycjb	dna-binding transcriptional activator	0.053	0.087	0.152	0.226	0.273	0.0731923	0.0954266	0.132813	0.159989	0.160038	1	1.30378	1.81458	2.18587	2.18655
b1304	pspa, cog, eck1299, jw1297	regulatory protein for phage-shock-protein operon	0.527	1.151	1.269	1.822	2.576	0.733268	1.26872	1.10808	1.28926	1.51244	1	1.73023	1.51116	1.75824	2.0626	1089.5	1552.5	1839	2098	1891	1500.89	1708	1502.38	1440.39	1118.12	1	1.13799	1.00099	0.959686	0.744972											2046.86	1346.24	1355.84	1117.22	739.287
b1305	pspb, eck1300, jw1298	dna-binding transcriptional regulator of psp operon	0.498	1.031	1.103	1.495	2.535	0.69354	1.13675	0.96264	1.05769	1.48875	1	1.63906	1.38801	1.52506	2.1466	32	48	69	66	63.5	44.0832	52.8079	56.3701	45.3125	37.5467	1	1.19791	1.27872	1.02789	0.851725											63.5625	46.4551	58.5578	42.841	25.2202
b1306	pspc, eck1301, jw1299	dna-binding transcriptional activator	0.328	0.72	0.787	0.994	1.441	0.456273	0.794299	0.687134	0.70312	0.846103	1	1.74084	1.50597	1.54101	1.85438
b1307	pspd, eck1302, jw1300	peripheral inner membrane phage-shock protein	0.572	1.117	1.096	1.397	1.996	0.796131	1.23156	0.957017	0.988372	1.17173	1	1.54693	1.20209	1.24147	1.47179
b1308	pspe, eck1303, jw1301	thiosulfate:cyanide sulfurtransferase (rhodanese) (ec:2,8,1,1)	0.463	0.999	0.968	1.017	0.896	0.645355	1.10191	0.845197	0.719965	0.526037	1	1.70745	1.30966	1.11561	0.815113	679.5					936.079																				1450.49
b1309	ycjm, eck1304, jw1302	predicted glucosyltransferase	0.084	0.137	0.152	0.253	0.317	0.11655	0.150621	0.132813	0.178936	0.186229	1	1.29233	1.13954	1.53527	1.59785
b1310	ycjn, eck1305, jw1303	predicted sugar transporter subunit: periplasmic-binding component	0.022	0.031	0.039	0.057	0.073	0.0299544	0.0345882	0.0343044	0.039995	0.0430587
b1311	ycjo, eck1306, jw1304	predicted sugar transporter subunit: membrane component of abc	0.031	0.039	0.05	0.068	0.113	0.0424867	0.0426833	0.0439034	0.0484217	0.0663857
b1312	ycjp, eck1307, jw1305	predicted sugar transporter subunit: membrane component of abc	0.043	0.078	0.115	0.152	0.238	0.0600897	0.0856094	0.100707	0.107363	0.139586	1	1.42469	1.67595	1.78672	2.32295
b1313	ycjq, eck1308, jw1306	predicted oxidoreductase, zn-dependent and nad(p)-binding	0.043	0.09	0.104	0.158	0.238	0.0592495	0.0995919	0.0911081	0.111576	0.139586	1	1.68089	1.5377	1.88316	2.35589
b1314	ycjr, eck1309, jw5202	predicted enzyme	0.101	0.14	0.157	0.253	0.382	0.140957	0.15405	0.13693	0.178936	0.22426	1	1.09289	0.97143	1.26944	1.59099
b1315	ycjs, eck1310, jw1308	predicted oxidoreductase, nadh-binding	0.03	0.07	0.083	0.113	0.165	0.0424579	0.0772715	0.0727169	0.0802968	0.0968821
b1316	ycjt, eck1311, jw1309	predicted hydrolase	0.727	0.648	0.826	1.659	2.671	1.01299	0.71482	0.721431	1.17438	1.56841	1	0.705651	0.712177	1.15932	1.5483
b1317	ycju, eck1312, jw1310	predicted beta-phosphoglucomutase	0.031	0.033	0.033	0.053	0.068	0.0428483	0.0365531	0.0285418	0.0375951	0.0401845
b1319	ompg, eck1315, jw1312	outer membrane porin	0.021	0.021	0.03	0.043	0.079	0.0293553	0.0235494	0.026072	0.0303775	0.0466433
b1320	ycjw, eck1316, jw1313	predicted dna-binding transcriptional regulator	0.023	0.015	0.122	0.154	0.164	0.0313334	0.0166833	0.10675	0.10887	0.0965268
b1321	ycjx, eck1317, jw1314	conserved protein with nucleoside triphosphate hydrolase domain	0.068	0.142	0.199	0.275	0.305	0.094871	0.156258	0.173975	0.194878	0.179049	1	1.64705	1.83381	2.05413	1.88729	346		428		672	476.649		349.658		397.345	1		0.733574		0.833621											5024.19		2009.81		2219.2
b1322	ycjf, eck1318, jw1315	conserved inner membrane protein	0.036	0.084	0.133	0.157	0.196	0.0506437	0.0929686	0.116349	0.11127	0.114827
b1323	tyrr, eck1319, jw1316	dna-binding transcriptional dual regulator, tyrosine-binding	0.264	0.385	0.567	0.824	1.027	0.36791	0.424868	0.495039	0.583126	0.603177	1	1.15482	1.34555	1.58497	1.63947	60	67.5	86.5	91	100	82.656	74.2611	70.6668	62.4763	59.1287	1	0.898436	0.854951	0.75586	0.715359											224.664	174.786	142.75	107.14	98.0288
b1324	tpx, eck1320, jw1317, yzzj	lipid hydroperoxide peroxidase (ec:1,11,1,-)	0.573	0.923	2.223	3.082	4.477	0.797857	1.01827	1.9412	2.18125	2.62873	1	1.27626	2.43302	2.73389	3.29474	7459	11324.5	15203	17183.5	21055.5	10275.5	12458.8	12420.2	11797.4	12449.8	1	1.21248	1.20872	1.14811	1.2116											12878.9	12235.3	6398.2	5408.54	4736.06
b1325	ycjg, eck1321, jw1318, ycjh	l-ala-d/l-glu epimerase	0.251	0.48	0.427	0.521	0.661	0.349709	0.529126	0.372928	0.369004	0.387883	1	1.51305	1.0664	1.05518	1.10916	215.5	240.5	214	181	155	296.873	264.589	174.829	124.266	91.6495	1	0.891256	0.588902	0.418584	0.308717											848.915	500.05	468.8	336.76	236.281
b1326	mpaa, eck1322, jw1319, ycji	murein peptide amidase a	0.192	0.218	0.333	0.396	0.406	0.267731	0.23991	0.290332	0.279983	0.238621	1	0.896086	1.08442	1.04576	0.891271	79.5	107	80	105	76	109.519	117.718	65.3566	72.088	44.9378	1	1.07486	0.596759	0.658223	0.410319											409.065	490.675	225.11	257.473	188.323
b1327	ycjy, eck1324, jw5804	predicted hydrolase	0.054	0.085	0.136	0.17	0.202	0.0748717	0.0939548	0.118547	0.119994	0.118767	1	1.25488	1.58333	1.60266	1.58627
b1328	ycjz, eck1325, jw1321	predicted dna-binding transcriptional regulator	0.062	0.083	0.188	0.246	0.308	0.0859962	0.091747	0.164097	0.174425	0.180847	1	1.06687	1.90818	2.02828	2.10296
b1329	mppa, eck1326, jw1322, ynah	murein tripeptide (l-ala-gamma-d-glutamyl-meso-dap) transporter	0.118	0.172	0.301	0.381	0.363	0.164165	0.189624	0.262614	0.269761	0.213141	1	1.15509	1.5997	1.64324	1.29833	369.5	421	461.5	364.5	326	509.023	463.169	377.026	250.249	192.76	1	0.909918	0.740685	0.491625	0.378685											3100.69	2442.56	1435.67	927.667	904.378
b1330	ynai, eck1327, jw1323	conserved inner membrane protein	0.068	0.095	0.236	0.303	0.331	0.0949007	0.105236	0.206082	0.214726	0.194485	1	1.10891	2.17155	2.26264	2.04936
b1332	ynaj, eck1328, jw1326	predicted inner membrane protein	0.264	0.41	0.756	0.981	1.489	0.36782	0.45259	0.660239	0.694098	0.874447	1	1.23047	1.79501	1.88706	2.37738
b1333	uspe, eck1329, jw1327, ydaa	stress-induced protein	0.644	1.3	1.201	1.454	1.406	0.896924	1.43381	1.04881	1.02882	0.82565	1	1.59859	1.16934	1.14705	0.920536	1394.5	1570	1639.5	1593	1521.5	1921.06	1727.26	1339.4	1093.68	899.643	1	0.899116	0.697219	0.569309	0.468305											2141.83	1204.66	1277.07	1063.04	1089.62
b1334	fnr, eck1330, jw1328, nira, nirr, ossa	dna-binding transcriptional dual regulator, global regulator of	0.731	0.918	1.687	2.257	2.81	1.01836	1.01262	1.47305	1.59721	1.65022	1	0.994367	1.44649	1.56841	1.62047	604.5	867	1397.5	1541.5	1903	832.759	953.842	1141.7	1058.32	1125.22	1	1.1454	1.37098	1.27086	1.35119											817.745	941.951	775.057	662.605	681.858
b1335	ogt, eck1331, jw1329	o-6-alkylguanine-dna:cysteine-protein methyltransferase	0.1	0.116	0.223	0.305	0.361	0.139907	0.12805	0.195108	0.215926	0.212064	1	0.91525	1.39456	1.54336	1.51575
b1336	abgt, eck1332, jw5822, ydah	predicted cryptic aminobenzoyl-glutamate transporter	0.057	0.11	0.106	0.148	0.196	0.0787082	0.121669	0.0927545	0.104954	0.115182	1	1.54583	1.17846	1.33346	1.46341
b1337	abgb, eck1333, jw1331, ydai	predicted peptidase, aminobenzoyl-glutamate utilization protein	0.294	0.393	0.475	0.783	1.052	0.408838	0.433699	0.414913	0.554255	0.617892	1	1.06081	1.01486	1.35569	1.51134
b1338	abga, eck1334, jw5205, ydaj	predicted peptidase, aminobenzoyl-glutamate utilization protein	0.708	0.73	0.853	1.311	2.168	0.986487	0.804852	0.744761	0.927473	1.27311	1	0.815878	0.754963	0.940178	1.29055
b1339	abgr, eck1335, jw1333	predicted dna-binding transcriptional regulator	0.07	0.102	0.156	0.174	0.187	0.0970299	0.112838	0.135835	0.122998	0.1098	1	1.16292	1.39993	1.26764	1.13161
b1340	ydal, eck1337, jw1334	conserved protein	0.117	0.095	0.257	0.343	0.346	0.162576	0.104994	0.224193	0.242993	0.203452	1	0.645812	1.379	1.49464	1.25143
b1341	ydam, eck1338, jw5206	predicted diguanylate cyclase, ggdef domain signalling protein	0.221	0.313	0.436	0.583	0.727	0.308271	0.345389	0.380337	0.412311	0.426636	1	1.12041	1.23378	1.3375	1.38397	26		47	29	28	35.8176		38.397	19.91	16.556	1		1.07202	0.555873	0.462232											116.189		100.955	48.2889	38.806
b1342	ydan, eck1339, jw1336, zntb	predicted zn(ii) transporter	0.209	0.261	0.435	0.609	0.694	0.29067	0.287251	0.380066	0.430959	0.40726	1	0.98824	1.30755	1.48264	1.40111
b1343	dbpa, eck1340, jw1337, rhlc	atp-dependent rna helicase, specific for 23s rrna	0.066	0.105	0.194	0.237	0.405	0.091782	0.115782	0.169588	0.167514	0.237899	1	1.26149	1.84772	1.82512	2.592
b1344	ttca, eck1341, jw1338, ydao	predicted c32 trna thiolase	0.09	0.15	0.328	0.504	0.855	0.125515	0.165582	0.286759	0.356671	0.501989	1	1.31921	2.28466	2.84165	3.99942
b1345	intr, eck1342, jw1339, ydap	rac prophage; integrase	0.228	0.322	0.351	0.575	0.697	0.317084	0.354956	0.306517	0.4066	0.409413	1	1.11944	0.966674	1.28231	1.29118
b1346	ydaq, eck1343, jw5207	rac prophage; conserved protein	0.012	0.037	0.044	0.057	0.104	0.0169715	0.0409686	0.0381407	0.039995	0.0610034
b1347	ydac, eck1344, jw1341	rac prophage; predicted protein	0.008	0.015	0.022	0.028	0.045	0.0111245	0.0166833	0.0192062	0.0201464	0.0265565
b1348	ralr, eck1345, jw5208, lar, ral, ydab	rac prophage; restriction alleviation protein	0.013	0.029	0.035	0.046	0.081	0.0176308	0.0316445	0.0304599	0.0324796	0.0473646
b1349	rect, eck1346, jw1343	rac prophage; recombination and repair protein	0.026	0.047	0.079	0.095	0.119	0.036011	0.0522502	0.0686007	0.0673681	0.0696151
b1350	rece, eck1347, jw1344, rmub, sbca	rac prophage; exonuclease viii, 5' -> 3' specific dsdna exonuclease	0.02	0.036	0.06	0.077	0.108	0.028365	0.0397396	0.0521358	0.0547372	0.0631563
b1351	racc, eck1348, jw1345, sbca	rac prophage; predicted protein	0.007	0.02	0.022	0.019	0.035	0.00998391	0.0225706	0.0189345	0.0135332	0.0208081
b1352	kilr, eck1350, jw1347, kil, ydad	rac prophage; inhibitor of ftsz, killing protein	0.01	0.021	0.025	0.032	0.041	0.0133733	0.0228135	0.0216759	0.0225553	0.0240375
b1353	sieb, eck1351, git, jw5209	rac prophage; phage superinfection exclusion protein	0.008	0.011	0.045	0.055	0.055	0.0104643	0.0125106	0.038964	0.0387951	0.032294
b1355	ydag, eck1353, gata, jw5210	rac prophage; predicted protein	0.03	0.033	0.064	0.074	0.09	0.0421431	0.036428	0.0555688	0.0523283	0.0527469
b1356	racr, cohr, eck1354, jw1351, ydar	rac prophage; predicted dna-binding transcriptional regulator	0.232	0.337	0.606	0.812	1.374	0.322543	0.371639	0.529072	0.574411	0.806629	1	1.15222	1.64032	1.78088	2.50085	91					125.362																				388.667
b1357	ydas, eck1355, jw1352	rac prophage; predicted dna-binding transcriptional regulator	0.011	0.038	0.065	0.077	0.125	0.0155916	0.0421902	0.0565319	0.0547372	0.073555
b1358	ydat, eck1356, jw1353	rac prophage; predicted protein	0.034	0.061	0.097	0.133	0.182	0.0478542	0.0667258	0.0850655	0.09383	0.106926
b1359	ydau, eck1357, jw1354	rac prophage; conserved protein	0.023	0.041	0.057	0.077	0.113	0.0316042	0.044891	0.0496661	0.0544304	0.0663857
b1360	ydav, eck1358, jw1355	rac prophage; predicted dna replication protein	0.045	0.089	0.093	0.138	0.24	0.062997	0.0976343	0.0812292	0.0977365	0.140662	1	1.54983		1.55145	2.23284
b1361	ydaw, eck1359, jw5211	pseudogene	0.038	0.07	0.084	0.105	0.147	0.052503	0.0770286	0.0729968	0.0745858	0.0864726
b1362	rzpr, eck1360, jw5212, rz, ydax	pseudogene	0.033	0.08	0.086	0.133	0.176	0.0465058	0.0883103	0.0749149	0.09383	0.103341
b1363	trkg, eck1362, jw1358	rac prophage; potassium transporter subunit	0.02	0.057	0.104	0.158	0.255	0.0285143	0.0630462	0.0911081	0.111576	0.149984
b1365	ynak, eck1363, jw1359	rac prophage; conserved protein	0.05	0.114	0.135	0.208	0.268	0.0697138	0.12621	0.117723	0.14706	0.157164	1	1.8104	1.68867	2.10949	2.25442
b1366	yday, eck1364, jw1360	pseudogene	0.037	0.064	0.07	0.127	0.16	0.0522035	0.0706482	0.0614714	0.0899234	0.0940079
b1368	ynaa, eck1365, jw1361	pseudogene	0.043	0.086	0.107	0.15	0.196	0.0604783	0.0949335	0.0930262	0.106461	0.115182	1	1.56971	1.53818	1.76032	1.90452
b1370	insh, eck0261	is5 transposase and trans-activator	2.015	2.233	2.933	3.94	3.44	2.80615	2.46214	2.5611	2.78873	2.02017	1	0.877408	0.912674	0.993793	0.719909
b1372	stfr, eck1367, jw1366, ynab	rac prophage; predicted tail fiber protein	0.031	0.036	0.068	0.08	0.097	0.0435068	0.0394968	0.059545	0.0565416	0.0570528
b1374	pinr, eck1369, jw1368, ynad	rac prophage; predicted site-specific recombinase	0.032	0.046	0.09	0.118	0.181	0.044167	0.0512715	0.0787594	0.0836079	0.106215
b1375	ynae, eck1370, jw1369	rac prophage; predicted dna-binding transcriptional regulator	0.026	0.083	0.072	0.101	0.216	0.0360713	0.0919899	0.0625663	0.0715724	0.127023
b1376	uspf, eck1371, jw1370, ynaf, yzzl	stress-induced protein, atp-binding protein	1.756	1.652	1.431	1.489	1.37	2.44514	1.8214	1.24968	1.05349	0.804476	1	0.744906	0.511088	0.430849	0.329011	4402	4675	3263	1939.5	1184	6064.19	5143.27	2665.73	1331.57	700.084	1	0.848137	0.439586	0.219579	0.115446											2480.1	2823.8	2133.13	1263.97	870.236
b1377	ompn, eck1372, jw1371, ynag	outer membrane pore protein n, non-specific	0.109	0.198	0.265	0.32	0.439	0.151452	0.218325	0.231059	0.226753	0.257997	1	1.44155	1.52563	1.4972	1.70349
b1378	ydbk, eck1374, jw1372	fused predicted pyruvate-flavodoxin oxidoreductase: conserved	0.117	0.244	0.291	0.362	0.521	0.162666	0.268853	0.25383	0.25593	0.305717	1	1.65279	1.56044	1.57335	1.87941	61.5	65.5	72.5	75.5	86.5	84.7224	72.0608	59.2294	51.8347	51.1463	1	0.850552	0.6991	0.611819	0.603693											520.836	268.03	233.343	202.535	167.3
b1379	hslj, eck1376, jw1374, ydbi	heat-inducible protein	0.074	0.121	0.201	0.263	0.537	0.103686	0.133201	0.175622	0.18646	0.31505	1	1.28467	1.69379	1.79832	3.03851
b1380	ldha, eck1377, hslf, hsli, htph, jw1375	fermentative d-lactate dehydrogenase, nad-dependent (ec:1,1,1,28)	0.174	0.203	0.539	0.651	0.677	0.242335	0.224212	0.470894	0.460425	0.397572	1	0.925217	1.94315	1.89995	1.64059	596.5	695.5	939.5	951.5	1005.5	821.738	765.164	767.531	653.255	594.539	1	0.931153	0.934034	0.794967	0.723514	0.00240999	0.00622764	0.0151645	0.0232066	0.0289599	1	2.5841	6.29234	9.62935	12.0166	3390.92	3412.68	1629.95	1418.81	1495.43	0.147128	0.408304
b1381	ydbh, eck1378, jw1376	predicted protein	0.047	0.106	0.121	0.201	0.287	0.0657558	0.117011	0.105375	0.141945	0.16865	1	1.77948	1.60252	2.15867	2.56479
b1382	ynbe, eck1379, jw1377	predicted lipoprotein	0.042	0.154	0.185	0.231	0.374	0.0585146	0.169629	0.161355	0.1633	0.219599	1	2.89892	2.75752	2.79076	3.7529
b1383	ydbl, eck1380, jw5216	conserved protein	0.066	0.199	0.242	0.309	0.465	0.0923829	0.219304	0.211021	0.218633	0.273067	1	2.37386	2.2842	2.36659	2.95582
b1384	fear, eck1381, jw1379, maob, maor, maox, ydbm	dna-binding transcriptional dual regulator	0.359	0.507	0.394	0.317	0.329	0.499301	0.559298	0.343843	0.224651	0.193043	1	1.12016	0.688649	0.44993	0.386626
b1385	feab, eck1382, jw1380, pada, ydbg	phenylacetaldehyde dehydrogenase (ec:1,2,1,39)	0.107	0.219	0.198	0.26	0.287	0.148902	0.241139	0.173152	0.184051	0.168284	1	1.61944	1.16286	1.23605	1.13016
b1386	tyna, eck1383, jw1381, maoa	tyramine oxidase, copper-requiring (ec:1,4,3,21)	0.037	0.045	0.075	0.101	0.104	0.0514829	0.0495494	0.0655876	0.0712747	0.0613586
b1387	maoc, eck1384, jw1382, paaz, ydbn	fused aldehyde dehydrogenase/enoyl-coa hydratase	0.046	0.09	0.087	0.136	0.218	0.0645855	0.099349	0.0762897	0.0959321	0.1281	1	1.53826		1.48535	1.98341
b1388	paaa, eck1385, jw1383, ydbo	predicted multicomponent oxygenase/reductase subunit for	0.012	0.025	0.035	0.043	0.042	0.0168213	0.0277221	0.0304599	0.0306752	0.0247587
b1389	paab, eck1386, jw1384, ynbf	predicted multicomponent oxygenase/reductase subunit for	0.269	0.437	0.369	0.614	0.731	0.375195	0.481784	0.321887	0.434568	0.429155	1	1.28409	0.85792	1.15825	1.14382
b1390	paac, eck1387, jw1385, ydbp	predicted multicomponent oxygenase/reductase subunit for	0.044	0.061	0.064	0.095	0.084	0.0619175	0.0674617	0.0559804	0.0670614	0.0491623
b1391	paad, eck1388, jw5217, ydbq	predicted multicomponent oxygenase/reductase subunit for	0.221	0.274	0.29	0.508	0.655	0.30836	0.30222	0.253558	0.359685	0.384654	1	0.980088	0.82228	1.16644	1.24742
b1392	paae, eck1389, jw1387, ydbr	predicted multicomponent oxygenase/reductase subunit for	0.072	0.141	0.129	0.193	0.236	0.100028	0.155772	0.112784	0.136532	0.138864	1	1.55728	1.12752	1.36493	1.38825
b1393	paaf, eck1390, jw1388, ydbr	enoyl-coa hydratase-isomerase (ec:4,2,1,17)	0.04	0.049	0.065	0.088	0.105	0.0554706	0.054458	0.0565319	0.0625503	0.0617139
b1394	paag, eck1391, jw1389, ydbt	acyl-coa hydratase (ec:4,2,1,17)	0.039	0.063	0.077	0.106	0.144	0.0545719	0.0696694	0.0675057	0.0751813	0.0843197
b1395	paah, eck1392, jw1390, ydbu	3-hydroxybutyryl-coa dehydrogenase (ec:1,1,1,157)	0.056	0.087	0.097	0.167	0.212	0.0781685	0.0961625	0.0847938	0.11819	0.124515	1	1.2302	1.08476	1.51199	1.59291
b1396	paai, eck1393, jw1391, ydbv	predicted thioesterase	0.016	0.042	0.065	0.08	0.092	0.0218883	0.0458698	0.0565319	0.0568393	0.0538234
b1397	paaj, eck1394, jw1392, ydbw	predicted beta-ketoadipyl coa thiolase	0.219	0.544	0.298	0.279	0.246	0.305511	0.599281	0.259872	0.197584	0.144602	1	1.96157	0.850616	0.646734	0.473312
b1398	paak, eck1395, jw5218	phenylacetyl-coa ligase (ec:6,2,1,30)	0.233	0.458	0.331	0.281	0.157	0.324821	0.504597	0.289229	0.198784	0.092221	1	1.55346	0.890426	0.61198
b1399	paax, eck1396, jw1394, ydby	dna-binding transcriptional repressor of phenylacetic acid	0.072	0.199	0.224	0.261	0.273	0.100028	0.219304	0.195931	0.184953	0.160394	1	2.19242	1.95876	1.84902	1.60349
b1400	paay, eck1397, jw1395, ydbz	predicted hexapeptide repeat acetyltransferase	0.181	0.38	0.382	0.408	0.458	0.252469	0.419231	0.333413	0.28841	0.269117	1	1.66052	1.32061	1.14236	1.06594	177.5	129	203.5		52	244.524	141.921	166.251		30.7469	1	0.580398	0.679896		0.125742											968.53	338.527	498.634		114.251
b1406	ydbc, eck1399, jw1403	predicted oxidoreductase, nad(p)-binding	0.325	0.474	0.401	0.408	0.461	0.452434	0.52226	0.350429	0.288708	0.270915	1	1.15433	0.774541	0.638121	0.598793	2062	1822	1030	1071	719	2840.61	2004.5	841.466	735.298	425.135	1	0.705658	0.296227	0.258852	0.149663											6278.5	3838.13	2401.25	2546.86	1569.26
b1407	ydbd, eck1400, jw5221	predicted protein	0.016	0.021	0.048	0.056	0.063	0.0226088	0.0235494	0.0417136	0.0396973	0.0369551
b1408	ynba, eck1401, jw1405	predicted inner membrane protein	0.046	0.136	0.176	0.302	0.166	0.0641663	0.15037	0.153674	0.213824	0.0976033	1	2.34344	2.39494	3.33234
b1409	ynbb, eck1402, jw1406	predicted cdp-diglyceride synthase	0.025	0.029	0.036	0.062	0.106	0.0342128	0.0323804	0.0310115	0.0442084	0.0624351
b1410	ynbc, eck1403, jw1407	predicted hydrolase	0.05	0.073	0.087	0.127	0.163	0.0697129	0.0799723	0.0760098	0.0896166	0.0954504	1	1.14717
b1411	ynbd, eck1404, jw1408	predicted phosphatase, inner membrane protein	1.023	1.292	1.365	1.783	2.664	1.42399	1.42498	1.1915	1.2619	1.56411	1	1.0007	0.836734	0.886169	1.0984
b1412	azor, acpd, eck1405, jw1409	nadh-azoreductase, fmn-dependent (ec:3,1,4,14)	0.128	0.175	0.376	0.51	0.719	0.178767	0.193304	0.328201	0.361182	0.421975	1	1.08132	1.83592	2.02041	2.36048	441.5	686	844	940.5	1064	608.21	754.713	689.512	645.703	629.13	1	1.24087	1.13367	1.06164	1.0344											3402.26	3904.28	2100.88	1787.75	1490.92
b1413	hrpa, eck1406, jw5905	atp-dependent helicase	0.16	0.302	0.294	0.506	0.743	0.222785	0.333128	0.256851	0.35788	0.436325	1	1.49529	1.15291	1.6064	1.9585
b1414	ydcf, eck1407, jw1411	conserved protein	0.147	0.13	0.286	0.331	0.351	0.204763	0.143747	0.249994	0.23397	0.205961	1	0.702016	1.22089	1.14264	1.00585	1034	987	810.5	924.5	728	1424.44	1085.86	662.144	634.718	430.457	1	0.762309	0.464846	0.445592	0.302194											6956.51	7553.98	2648.64	2712.81	2090
b1415	alda, ald, eck1408, jw1412	aldehyde dehydrogenase a, nad-linked (ec:1,2,1,22)	4.769	4.816	3.84	3.329	1.248	6.64053	5.31063	3.35251	2.35628	0.732719	1	0.79973	0.504856	0.354833	0.11034	16750.5					23075.5																				3474.95
b1418	cybb, eck1410, jw5224	cytochrome b561	0.157	0.209	0.51	0.794	1.408	0.218317	0.2301	0.445102	0.562078	0.826727	1	1.05397	2.03878	2.57459	3.78681
b1419	ydca, eck1411, jw1416	predicted protein	0.299	0.395	0.381	0.579	0.978	0.416888	0.435296	0.332589	0.410055	0.574295	1	1.04415	0.79779	0.983609	1.37758
b1420	mokb, eck1413, jw5882	regulatory peptide	1.625	1.455	1.229	0.992	0.659	2.26259	1.60467	1.07268	0.702371	0.38699	1	0.709217	0.474094	0.310428	0.171038
b1421	trg, eck1415, jw1417	methyl-accepting chemotaxis protein iii, ribose and galactose sensor	0.43	1.186	0.627	0.706	0.558	0.59819	1.30822	0.547727	0.499527	0.327601	1	2.18697	0.91564	0.835065	0.547654	136					187.354																				313.201
b1422	ydci, eck1416, jw5226	predicted dna-binding transcriptional regulator	0.565	1.065	1.151	1.234	1.325	0.786912	1.17428	1.00518	0.873043	0.777931	1	1.49227	1.27737	1.10945	0.988587	248	325	399	435.5	380	341.645	357.553	325.966	298.994	224.689	1	1.04656	0.954108	0.87516	0.657669											434.159	304.486	324.287	342.473	288.829
b1423	ydcj, eck1417, jw1419	conserved protein	0.427	0.542	0.276	0.297	0.284	0.594411	0.597323	0.240938	0.210513	0.166497	1	1.0049	0.405339	0.354154	0.280105	401	271.5	84	36.5	19	552.417	298.695	68.6244	25.0592	11.2345	1	0.540704	0.124226	0.0453628	0.0203369											929.353	500.055	284.822	119.039	67.4753
b1424	opgd, eck1418, jw1420, mdod, ydcg, yzzz	glucan biosynthesis protein, periplasmic	0.167	0.217	0.398	0.549	0.74	0.232858	0.238931	0.347136	0.388249	0.434538	1	1.02608	1.49076	1.66732	1.8661	105	128.5	153	154	166	144.648	141.371	124.994	105.729	98.1537	1	0.977346	0.864129	0.730941	0.678569											621.184	591.682	360.074	272.323	225.881
b1426	ydch, eck1419, jw5823	predicted protein	0.286	0.357	0.219	0.183	0.375	0.398703	0.393224	0.191543	0.129314	0.220321	1	0.986256	0.480416	0.324336	0.552593	1143	850.5	304.5	90	56	1574.6	935.69	248.763	61.7898	33.1121	1	0.594241	0.157986	0.0392416	0.0210289											3949.29	2379.54	1298.73	477.827	150.29
b1427	riml, eck1420, jw1423	ribosomal-protein-l7/l12-serine acetyltransferase (ec:2,3,1,-)	0.187	0.361	0.388	0.505	0.677	0.260954	0.397639	0.339175	0.357276	0.397572	1	1.52379	1.29975	1.36911	1.52353	135.5	125		123.5	98	186.665	137.521		84.7893	57.9461	1	0.736725		0.454233	0.310429											715.316	345.843		237.322	145.75
b1428	ydck, eck1421, jw1424	predicted enzyme	0.113	0.221	0.267	0.402	0.381	0.157478	0.244082	0.233249	0.284197	0.22355	1	1.54994	1.48115	1.80467	1.41956
b1429	teha, eck1422, jw1425	potassium-tellurite ethidium and proflavin transporter	0.079	0.131	0.175	0.242	0.33	0.110253	0.144733	0.153123	0.171122	0.193764	1	1.31274	1.38883	1.55209	1.75745
b1430	tehb, eck1423, jw1426	predicted s-adenosyl-l-methionine-dependent methyltransferase	0.12	0.267	0.439	0.623	1.041	0.167733	0.294368	0.38363	0.440577	0.611433	1	1.75498	2.28715	2.62665	3.64528	127.5	163.5	272	282	369	175.644	179.877	222.212	193.608	218.185	1	1.0241	1.26513	1.10227	1.2422											1047.16	611.062	579.236	439.442	356.842
b1431	ydcl, eck1424, jw1427	predicted lipoprotein	0.615	0.367	0.853	1.049	1.196	0.855995	0.404998	0.745033	0.742222	0.702212	1	0.473131	0.870371	0.867087	0.820346	1982	1616	1195.5	1050	946	2730.4	1777.87	976.672	720.88	559.358	1	0.651137	0.357703	0.26402	0.204863											3189.74	4389.81	1310.91	971.246	796.565
b1432	ydcm, eck1426, jw5228	predicted transposase	0.093	0.145	0.232	0.298	0.37	0.130163	0.160187	0.202789	0.211117	0.217091	1	1.23067	1.55796	1.62194	1.66784
b1433	ydco, eck1427, jw5229	predicted benzoate transporter	0.05	0.111	0.131	0.171	0.222	0.0697434	0.122656	0.114702	0.121194	0.130608	1	1.75867	1.64463	1.73771	1.87269
b1434	ydcn, eck1428, jw1430	predicted dna-binding transcriptional regulator	0.129	0.246	0.285	0.51	0.607	0.178977	0.271311	0.24917	0.360587	0.356666	1	1.5159	1.39219	2.01471	1.9928
b1435	ydcp, eck1429, jw1431	predicted peptidase	0.04	0.065	0.166	0.229	0.377	0.0560112	0.0718772	0.14489	0.162398	0.221397	1		2.58681	2.89939	3.95273
b1436	yncj, eck1430, jw1432	predicted protein	0.016	0.04	0.06	0.082	0.08	0.0223993	0.0441551	0.0524157	0.058346	0.0470093
b1438	ydcq, eck1432, hicb, jw1433	predicted dna-binding transcriptional regulator	0.1	0.108	0.25	0.345	0.471	0.139727	0.118726	0.21871	0.244499	0.276297	1	0.849698	1.56527	1.74983	1.9774
b1439	ydcr, eck1433, jw1434	fused predicted dna-binding transcriptional regulator/predicted	0.076	0.084	0.194	0.252	0.353	0.105275	0.0929686	0.169588	0.178638	0.207037	1	0.883103	1.6109	1.69687	1.96663
b1440	ydcs, eck1434, jw1435	predicted spermidine/putrescine transporter subunit	1.013	1.588	0.393	0.354	0.232	1.41125	1.75124	0.34302	0.25021	0.13599	1	1.24092	0.243061	0.177297	0.0963617	4556.5	3199	961	489.5	209.5	6277.03	3519.43	785.096	336.068	123.875	1	0.560683	0.125074	0.0535393	0.0197346											4447.86	2009.67	2288.78	1343.14	910.909
b1441	ydct, eck1435, jw1436	predicted spermidine/putrescine transporter subunit	0.522	0.65	0.382	0.444	0.443	0.726732	0.716785	0.333141	0.314574	0.26015	1	0.986312	0.458409	0.432861	0.357972	255	170				351.288	187.028				1	0.532406														483.38	260.926
b1442	ydcu, eck1436, jw1437	predicted spermidine/putrescine transporter subunit	0.263	0.3	0.26	0.357	0.423	0.366139	0.330428	0.226663	0.252917	0.248309	1	0.902464	0.619062	0.690767	0.678181
b1443	ydcv, eck1437, jw1438	predicted spermidine/putrescine transporter subunit	0.396	0.294	0.292	0.348	0.307	0.551744	0.324047	0.254653	0.246304	0.180125	1	0.587315	0.461542	0.44641	0.326466
b1444	prr, eck1438, jw1439, ydcw	medium chain aldehyde dehydrogenase	0.845	0.606	0.548	0.544	0.446	1.17707	0.668707	0.478575	0.385244	0.261937	1	0.568113	0.406582	0.327291	0.222533	2974					4096.98																				3480.67
b1445	ydcx, eck1439, jw5232	predicted inner membrane protein	0.041	0.084	0.171	0.254	0.442	0.0574801	0.0927258	0.149007	0.179991	0.259429	1	1.61318	2.59231	3.13136	4.51336
b1446	ydcy, eck1440, jw1441	predicted protein	0.176	0.16	0.531	0.722	1.014	0.245723	0.176127	0.463756	0.511256	0.595286	1	0.716774	1.88732	2.08062	2.4226	448.5					617.853																				2514.43
b1447	ydcz, eck1441, jw1442	predicted inner membrane protein	0.116	0.181	0.285	0.355	0.404	0.162186	0.199191	0.248619	0.251112	0.237178	1	1.22817	1.53293	1.5483	1.46239
b1448	ynca, eck1442, jw5233	predicted acyltransferase with acyl-coa n-acyltransferase domain	0.257	0.35	0.609	0.776	0.958	0.357265	0.385621	0.531542	0.548842	0.562271	1	1.07937	1.48781	1.53623	1.57382
b1449	yncb, eck1443, jw5907	predicted oxidoreductase, zn-dependent and nad(p)-binding	0.28	0.339	0.479	0.529	0.721	0.390158	0.37434	0.418206	0.374418	0.423407	1	0.959457	1.07189	0.959657	1.08522	823	680	604.5	584	488.5	1133.76	748.112	493.851	400.947	288.844	1	0.659848	0.435585	0.353642	0.254765											2905.91	1998.48	1180.88	1070.85	682.19
b1450	mcbr, eck1444, jw1445, yncc	predicted dna-binding transcriptional regulator	0.078	0.073	0.171	0.237	0.271	0.109232	0.0809511	0.149278	0.167514	0.159317	1	0.741093	1.36662	1.53356	1.45852
b1451	yncd, eck1445, jw1446	predicted iron outer membrane transporter	0.047	0.06	0.101	0.14	0.233	0.0658458	0.0662327	0.0880868	0.0989455	0.136711	1		1.33777	1.50269	2.07624
b1452	ynce, eck1446, jw1447	conserved protein	0.186	0.45	1.12	1.555	1.865	0.259605	0.496009	0.978282	1.1004	1.09512	1	1.91063	3.76835	4.23875	4.21842	375	483	1119	1502	1327	516.6	531.379	914.175	1031.2	784.638	1	1.02861	1.7696	1.99613	1.51885											1989.95	1071.31	934.47	937.116	716.484
b1453	ansp, eck1447, jw5234, yncf	l-asparagine transporter	0.024	0.047	0.078	0.122	0.191	0.0331927	0.0515143	0.068329	0.0863146	0.111953
b1454	yncg, eck1448, jw1449	predicted enzyme	0.093	0.127	0.141	0.159	0.189	0.129562	0.140067	0.123486	0.112479	0.111231	1	1.08108	0.953102	0.868143	0.858516
b1455	ynch, eck1449, jw5235	predicted protein	0.006	0.004	0.007	0.025	0.013	0.00868049	0.00478347	0.00617431	0.0175931	0.00753527
b1456	rhse, eck1450, jw1451	pseudogene	0.132	0.05	0.098	0.118	0.155	0.184164	0.0549511	0.0853454	0.0833012	0.0911445	1		0.463421
b1457	ydcd, eck1451, jw1452	predicted protein	0.007	0.018	0.033	0.043	0.076	0.00992454	0.0201127	0.0288134	0.0303775	0.0448564
b1459	ynci, eck1452, jw1453, yncm	pseudogene	0.025	0.061	0.069	0.102	0.166	0.0343028	0.0672115	0.0606481	0.0718792	0.0972373
b1460	ydcc, eck1454, jw1455	conserved protein	0.109	0.07	0.07	0.113	0.147	0.151541	0.0772715	0.0611915	0.0799991	0.0864726	1	0.509906
b1461	ppta, eck1455, jw1456, ydce	4-oxalocrotonate tautomerase (ec:5,3,2,-)	0.115	0.155	0.358	0.425	0.611	0.159982	0.171101	0.31242	0.300436	0.359002	1	1.0695	1.95285	1.87794	2.24402	258					355.421																				2221.63
b1462	yddh, eck1456, jw1457	conserved protein	0.07	0.139	0.129	0.157	0.229	0.097449	0.153314	0.113056	0.110972	0.134558	1	1.57327	1.16015	1.13877	1.38081	145	70				199.752	77.0115				1	0.385536														2049.81	502.312
b1463	nhoa, eck1457, jw1458, yddi	n-hydroxyarylamine o-acetyltransferase (ec:2,3,1,118)	0.213	0.235	0.273	0.365	0.685	0.296455	0.259043	0.238188	0.258637	0.402244	1	0.873803	0.803454	0.872431	1.35684
b1464	ydde, eck1458, jw1459	conserved protein	0.088	0.137	0.282	0.353	0.548	0.122876	0.150621	0.246149	0.249615	0.321509	1	1.22579	2.00323	2.03143	2.61653
b1465	narv, chlz, eck1459, jw1460	nitrate reductase 2 (nrz), gamma subunit (ec:1,7,99,4)	0.15	0.233	0.237	0.379	0.482	0.208332	0.256836	0.206633	0.267957	0.282756	1	1.23282	0.991848	1.2862	1.35724
b1466	narw, chlz, eck1460, jw1461	nitrate reductase 2 (nrz), delta subunit (assembly subunit)	0.116	0.184	0.218	0.271	0.47	0.162186	0.202871	0.190169	0.191873	0.275931	1	1.25085	1.17254	1.18305	1.70133
b1467	nary, chlz, eck1461, jw1462	nitrate reductase 2 (nrz), beta subunit (ec:1,7,99,4)	0.049	0.072	0.105	0.123	0.187	0.0687845	0.0794792	0.0913797	0.0872168	0.1098	1	1.15548	1.32849		1.59628
b1468	narz, chlz, eck1462, jw1463	nitrate reductase 2 (nrz), alpha subunit (ec:1,7,99,4)	0.097	0.091	0.127	0.177	0.262	0.135259	0.100821	0.110866	0.12511	0.153935	1	0.745391	0.819655	0.924963	1.13807
b1469	naru, eck1463, jw1464, yddf	nitrate/nitrite transporter	0.026	0.026	0.066	0.084	0.113	0.0358311	0.0282078	0.0576269	0.0595459	0.0663857
b1470	yddj, eck1464, jw1466	predicted protein	0.006	0.003	0.004	0.004	0.007	0.00773598	0.00343674	0.00356463	0.00300436	0.00395064						161					221.794
b1471	yddk, eck1465, jw1467	pseudogene	0.006	0.003	0.004	0.006	0.006	0.00815516	0.00294368	0.00356463	0.00390657	0.00358464
b1472	yddl, eck1466, jw1468	pseudogene	0.009	0.025	0.026	0.04	0.062	0.0126834	0.027229	0.0227791	0.0279685	0.0362447
b1473	yddg, eck1467, jw1469	predicted methyl viologen efflux pump	0.05	0.032	0.197	0.266	0.374	0.0695941	0.0353241	0.172329	0.187958	0.219599	1		2.4762	2.70077	3.15543
b1474	fdng, eck1468, jw1470	formate dehydrogenase-n, alpha subunit, nitrate-inducible	0.091	0.136	0.15	0.231	0.334	0.126714	0.150127	0.130624	0.1633	0.196272	1	1.18477	1.03085	1.28873	1.54893
b1475	fdnh, eck1469, jw1471	formate dehydrogenase-n, fe-s (beta) subunit, nitrate-inducible	0.026	0.027	0.034	0.045	0.064	0.0356215	0.0296796	0.0299083	0.0321819	0.0373211
b1476	fdni, eck1470, jw1472	formate dehydrogenase-n, cytochrome b556 (gamma) subunit,	0.021	0.035	0.04	0.047	0.063	0.0287248	0.0387608	0.0348478	0.0333818	0.0369551
b1477	yddm, eck1471, jw5908	predicted dna-binding transcriptional regulator	0.113	0.184	0.239	0.286	0.443	0.157328	0.202871	0.208831	0.202393	0.26015	1	1.28947	1.32736	1.28644	1.65355
b1478	adhp, eck1472, jw1474, yddn	ethanol-active dehydrogenase/acetaldehyde-active reductase	0.568	0.518	0.751	0.833	1.164	0.79138	0.57083	0.656123	0.589748	0.683202	1	0.72131	0.829087	0.745215	0.863304	542.5					747.348																				944.36
b1479	maea, eck1473, jw5238, sfca	malate dehydrogenase, (decarboxylating, nad-requiring) (malic	0.407	0.934	1.321	1.902	2.205	0.566556	1.02955	1.15309	1.3458	1.29499	1	1.81721	2.03526	2.37541	2.28572	636	956.5	1442.5	1683	1733.5	876.153	1052.31	1178.46	1155.47	1025	1	1.20105	1.34504	1.3188	1.16988											1546.45	1022.1	1022	858.573	791.509
b1480	sra, eck1474, jw5962, rpsv	30s ribosomal subunit protein s22	5.593	4.715	5.261	5.986	8.71	7.7877	5.1989	4.59327	4.23633	5.1143	1	0.667578	0.589811	0.543977	0.656714	5282	5935	7806.5	8195	9274	7276.48	6529.47	6377.58	5626.3	5483.6	1	0.89734	0.876464	0.773217	0.753606											934.355	1255.93	1388.46	1328.11	1072.21
b1481	bdm, eck1475, jw5239, yddx	biofilm-dependent modulation protein	0.117	0.095	0.19	0.243	0.35	0.162501	0.1045	0.166295	0.171871	0.205605	1	0.643078	1.02335	1.05767	1.26526
b1482	osmc, eck1476, jw1477	osmotically inducible, stress-inducible membrane protein	1.558	1.189	1.78	2.178	2.581	2.16928	1.31067	1.55455	1.54127	1.51531	1	0.604196	0.716619	0.7105	0.698531	16409.5	11374.5	9424.5	8820	6940	22605.7	12513.8	7699.41	6055.4	4103.53	1	0.553569	0.340596	0.26787	0.181526											10420.8	9547.64	4952.82	3928.82	2708.05
b1483	ddpf, eck1477, jw1478, yddo	d-ala-d-ala transporter subunit	0.078	0.103	0.109	0.124	0.131	0.108184	0.114067	0.0949444	0.0875145	0.0767844	1	1.05438	0.877619
b1484	ddpd, eck1478, jw1479, yddp	d-ala-d-ala transporter subunit	0.05	0.102	0.091	0.103	0.081	0.0692037	0.112596	0.0793028	0.0727814	0.0477198	1	1.62702
b1485	ddpc, eck1479, jw1480, yddq	d-ala-d-ala transporter subunit	0.081	0.132	0.142	0.207	0.216	0.11295	0.145469	0.124038	0.146763	0.126668	1	1.28791	1.09817	1.29936	1.12145
b1486	ddpb, eck1480, jw1481, yddr	d-ala-d-ala transporter subunit	0.035	0.045	0.064	0.062	0.06	0.0481862	0.0500425	0.0559804	0.0439106	0.0351682
b1487	ddpa, eck1481, jw5240, ydds	d-ala-d-a la transporter subunit	0.188	0.296	0.211	0.181	0.132	0.261254	0.326255	0.184406	0.128412	0.0775057	1	1.2488	0.705849	0.491521		332	263	141.5			457.363	289.343	115.599			1	0.632633	0.252752													1750.65	886.862	626.875
b1488	ddpx, eck1482, jw1483, vanx, yddt	d-ala-d-ala dipeptidase, zn-dependent (ec:3,4,13,-)	0.23	0.455	0.223	0.215	0.182	0.320263	0.502139	0.195108	0.152176	0.106926	1	1.5679	0.609212	0.475159
b1489	dos, eck1483, jw1484, yddu	camp phosphodiesterase, heme-regulated	0.231	0.32	0.297	0.534	0.656	0.321792	0.352748	0.259321	0.377729	0.38502	1	1.0962	0.805866	1.17383	1.19649
b1490	yddv, eck1484, jw5241	predicted diguanylate cyclase	0.279	0.289	0.377	0.476	0.549	0.388179	0.31841	0.329296	0.336525	0.322219	1	0.820266	0.848311	0.866932	0.830079	108.5	75	79	60	53	149.47	82.5123	64.5396	41.1932	31.3382	1	0.552034	0.431791	0.275596	0.209663											385.053	259.139	195.993	122.408	97.2575
b1491	yddw, eck1485, jw1486	predicted liprotein	0.1	0.076	0.263	0.36	0.434	0.139488	0.0836519	0.229956	0.254424	0.254768	1	0.599708	1.64857	1.82398	1.82645
b1492	gadc, acsa, eck1486, jw1487, xasa	predicted glutamate:gamma-aminobutyric acid antiporter	0.201	0.182	0.449	0.657	1.078	0.280114	0.200663	0.392134	0.464937	0.632963	1	0.716361	1.39991	1.65981	2.25966	501.5	325.5	178	381	254	690.866	358.103	145.418	261.577	150.187	1	0.51834	0.210487	0.378621	0.217389											2466.37	1784.6	370.838	562.607	237.276
b1493	gadb, eck1487, jw1488	glutamate decarboxylase b, plp-dependent (ec:4,1,1,15)	0.594	0.316	0.82	1.401	2.025	0.826461	0.34809	0.715668	0.991232	1.18878	1	0.421181	0.865943	1.19937	1.43839	205			120		282.408			82.3863		1			0.291728												341.708			83.1151
b1494	pqql, eck1488, jw1489, pqqe, pqqm, yddc	predicted peptidase	0.023	0.09	0.126	0.157	0.2	0.0317229	0.0995919	0.110314	0.110972	0.117335						25					34.44
b1495	yddb, eck1489, jw1490	predicted porin protein	0.018	0.065	0.1	0.131	0.152	0.0251878	0.07212	0.0875352	0.0929278	0.0889916
b1496	ydda, eck1490, jw5242	fused predicted multidrug transporter subunits of abc superfamily:	0.018	0.038	0.064	0.099	0.141	0.0253074	0.0424404	0.0559804	0.069768	0.082888
b1497	ydem, eck1491, jw1492	conserved protein	0.009	0.023	0.036	0.033	0.038	0.012624	0.0252641	0.0310115	0.0231598	0.0226058
b1498	yden, eck1492, jw5243	conserved protein	0.097	0.352	0.372	0.367	0.19	0.13439	0.387586	0.32518	0.259539	0.111597	1	2.88404	2.41967	1.93124	0.830398	448	836	59	780	27	617.165	919.737	48.2005	535.511	15.9648	1	1.49026	0.0780999	0.867696	0.0258679											4592.33	2372.99	148.227	2063.32	143.057
b1499	ydeo, eck1493, jw1494	predicted dna-binding transcriptional activator	0.007	0.026	0.055	0.085	0.144	0.00959441	0.0291939	0.0482995	0.0601504	0.0846857
b1500	ynen, eck4475	two component system connector membrane protein, evgsa to phoqp	0.005	0.005	0.01	0.016	0.023	0.00638668	0.00515143	0.00905565	0.0112776	0.0134558
b1501	ydep, eck1494, jw1495	predicted oxidoreductase	0.016	0.039	0.072	0.089	0.125	0.0220394	0.0429261	0.0631179	0.0631548	0.0731998
b1502	ydeq, eck1495, fmld, jw1496	predicted fimbrial-like adhesin protein	0.045	0.073	0.068	0.144	0.169	0.0631175	0.080458	0.0590017	0.101652	0.0993902	1	1.27473		1.61052
b1503	yder, eck1496, fmam, jw1497	predicted fimbrial-like adhesin protein	0.027	0.054	0.064	0.105	0.145	0.0380799	0.0593666	0.0559804	0.0739813	0.0850409
b1504	ydes, eck1497, fman, jw1498	predicted fimbrial-like adhesin protein	0.05	0.107	0.091	0.17	0.173	0.0702544	0.11799	0.0798544	0.119994	0.101543	1	1.67947		1.70799
b1505	ydet, eck1498, fmlc, jw1499	pseudogene	0.018	0.02	0.025	0.035	0.058	0.0245572	0.0215845	0.0214043	0.0249642	0.0340917
b1506	ynel, eck1499, jw5244	pseudogene	0.008	0.016	0.024	0.029	0.039	0.0118154	0.017169	0.020581	0.0204531	0.022961
b1507	hipa, eck1500, jw1500	regulator with hipb	0.073	0.117	0.231	0.289	0.339	0.101466	0.129029	0.201694	0.204504	0.198791	1	1.27164	1.98779	2.01549	1.95918
b1508	hipb, eck1501, jw1501	dna-binding transcriptional regulator	0.053	0.099	0.22	0.316	0.359	0.0736411	0.109409	0.192367	0.223451	0.210632	1	1.48571	2.61222	3.03432	2.86025
b1511	lsrk, eck1504, jw1504, ydev	autoinducer-2 (ai-2) kinase	0.176	0.42	0.122	0.118	0.108	0.244524	0.462893	0.106198	0.0836079	0.0635116	1	1.89304	0.434306			69	44	13	7		95.0544	48.4072	10.6204	4.80587		1	0.509258	0.11173	0.0505592												388.733	104.575	100.006
b1512	lsrr, eck1505, jw1505, ydew	lsr operon transcriptional repressor	0.468	1.552	0.423	0.566	0.644	0.652252	1.71101	0.369084	0.400284	0.378195	1	2.62324	0.56586	0.613696	0.57983	45					61.992																				95.043
b1513	lsra, eck1506, ego, jw1506, ydex	fused ai2 transporter subunits of abc superfamily: atp-binding	0.165	1.577	0.091	0.075	0.046	0.22977	1.73848	0.0790311	0.0529327	0.0272669	1	7.56618				150	145	43			206.64	159.524	35.1292			1	0.771989	0.170002													899.333	91.7603
b1514	lsrc, eck1507, jw1507, ydey	ai2 transporter	0.106	0.686	0.072	0.064	0.058	0.147404	0.756767	0.0625663	0.0451106	0.0340917	1	5.13398
b1515	lsrd, eck1508, jw1508, ydez	ai2 transporter	0.083	0.172	0.059	0.057	0.05	0.115531	0.19011	0.0515925	0.0403018	0.0294199	1	1.64554
b1516	lsrb, eck1509, jw1509, ynea	ai2 transporter	0.521	0.77	0.261	0.307	0.286	0.724814	0.84925	0.227486	0.217135	0.167929	1	1.17168	0.313854	0.299573	0.231685	2810.5	2801.5	1057.5	197	123	3871.74	3082.11	863.932	135.251	72.7283	1	0.796052	0.223138	0.0349328	0.0187844											5341.7	3629.21	3797.74	622.888	433.09
b1517	lsrf, eck1510, jw1510, yneb	putative autoinducer-2 (ai-2) aldolase	0.767	1.01	0.69	1.033	1.35	1.06834	1.11394	0.602061	0.730791	0.792635	1	1.04268	0.563546	0.684041	0.741929	774	752.5	267		83	1066.26	827.874	218.128		49.0768	1	0.776426	0.204572		0.046027											998.051	743.195	362.302		61.916
b1518	lsrg, eck1511, jw1511, ynec	autoinducer-2 (ai-2) modifying protein lsrg	0.512	0.963	0.229	0.185	0.148	0.712969	1.06217	0.200048	0.130821	0.0868386	1	1.48979	0.280584	0.183487		69.5	59.5				95.7432	65.4598				1	0.683702														134.288	61.6281
b1519	tam, eck1512, jw1512, lsre, yned	trans-aconitate methyltransferase (ec:2,1,1,144)	0.308	0.334	0.364	0.428	0.453	0.429108	0.368695	0.317771	0.302845	0.265887	1	0.859212	0.740538	0.705755	0.619628	191.5	212	189	144.5	97.5	263.81	233.235	154.405	99.2069	57.6505	1	0.8841	0.585288	0.376054	0.21853											614.787	632.595	485.9	327.583	216.823
b1520	ynee, eck1513, jw5245	conserved inner membrane protein	0.021	0.025	0.074	0.097	0.276	0.0287248	0.0277221	0.0647644	0.0688658	0.161825
b1521	uxab, eck1514, jw1514	altronate oxidoreductase, nad-dependent (ec:1,1,1,58)	0.047	0.072	0.091	0.117	0.164	0.0653654	0.0797221	0.0795827	0.0827057	0.0965268	1	1.21964
b1522	ynef, eck1515, jw5825	predicted diguanylate cyclase	0.023	0.066	0.064	0.083	0.13	0.0313334	0.0726131	0.056252	0.0586437	0.076074
b1523	yneg, eck1516, jw1516	conserved protein	0.067	0.083	0.18	0.267	0.422	0.0935505	0.0910111	0.157511	0.18886	0.247587	1	0.972855	1.6837	2.0188	2.64657
b1524	yneh, eck1517, jw1517	glutaminase	0.083	0.087	0.27	0.394	0.595	0.11559	0.0954266	0.235719	0.278783	0.349131	1	0.825562	2.03927	2.41183	3.02042
b1525	sad, eck1518, jw5247, ynei	predicted aldehyde dehydrogenase (ec:1,2,1,24)	0.471	0.6	0.714	1.156	1.386	0.655939	0.661098	0.623465	0.818306	0.813809	1	1.00786	0.950492	1.24753	1.24068
b1526	ynej, eck1519, jw1519	predicted dna-binding transcriptional regulator	0.082	0.061	0.155	0.195	0.222	0.114031	0.0667258	0.135283	0.137741	0.130608	1		1.18637	1.20792	1.14537
b1527	ynek, eck1520, jw1520	predicted protein	0.035	0.052	0.078	0.105	0.131	0.0485451	0.0574017	0.068329	0.0745858	0.0767844
b1528	ydea, eck1521, jw1521	predicted arabinose transporter	0.052	0.047	0.135	0.212	0.587	0.0723233	0.0515143	0.117723	0.150372	0.34447	1		1.62774	2.07916	4.76291
b1529	marc, eck1522, jw1522, ydeb, ydec	conserved protein	0.062	0.088	0.165	0.224	0.313	0.0867149	0.0971413	0.143795	0.158185	0.183721	1	1.12024	1.65826	1.82419	2.11867
b1530	marr, cfxb, eck1523, inar, jw5248, soxq	dna-binding transcriptional repressor of multiple antibiotic	0.079	0.067	0.25	0.341	0.435	0.109383	0.0738347	0.217887	0.241188	0.255478	1	0.67501	1.99196	2.20498	2.33562
b1531	mara, cfxb, eck1524, inar, jw5249, nfxc, norb, soxq	dna-binding transcriptional dual activator of multiple antibiotic	0.089	0.092	0.316	0.41	0.578	0.123326	0.1018	0.276057	0.290512	0.339442	1	0.825452	2.23844	2.35564	2.7524
b1532	marb, eck1525, jw1525	predicted protein	0.03	0.046	0.123	0.161	0.221	0.042413	0.0504104	0.107021	0.11413	0.129714
b1533	eama, eck1526, jw5250, yded	cysteine and o-acetyl-l-serine efflux system	0.177	0.287	0.424	0.481	0.565	0.245783	0.316445	0.370458	0.340134	0.331552	1	1.2875	1.50726	1.38388	1.34896
b1534	ydee, eck1527, jw1527, ydef	predicted transporter	0.034	0.059	0.109	0.137	0.165	0.0472857	0.0652539	0.0952243	0.0968343	0.0968821
b1535	ydeh, eck1528, jw1528, ydeg	conserved protein	0.047	0.084	0.162	0.225	0.342	0.0649462	0.0929686	0.141326	0.159087	0.200578	1	1.43147	2.17604	2.44952	3.08837
b1536	ydei, eck1529, jw1529	conserved protein	0.13	0.148	0.26	0.326	0.425	0.181405	0.162638	0.226943	0.230668	0.249385	1	0.896546	1.25103	1.27156	1.37474	505.5	338			497	696.377	371.855			293.87	1	0.533986			0.421998											3838.79	2286.4			1178.38
b1537	ydej, eck1530, jw1530	conserved protein	0.06	0.072	0.134	0.175	0.234	0.0841063	0.0789862	0.116629	0.123901	0.137433	1	0.939123	1.38668	1.47314	1.63403	249					343.022																				4078.44
b1538	dcp, eck1531, jw1531	dipeptidyl carboxypeptidase ii (ec:3,4,15,5)	0.284	0.421	0.699	0.957	1.182	0.395224	0.464608	0.610573	0.677263	0.694321	1	1.17556	1.54488	1.71362	1.75678	519	657.5	813.5	817	918	714.974	723.358	664.595	560.914	542.802	1	1.01173	0.929537	0.784523	0.759191											1809.04	1556.92	1088.48	828.207	781.773
b1539	ydfg, eck1532, jw1532	l-allo-threonine dehydrogenase, nad(p)-binding	0.355	0.523	1.195	1.474	1.907	0.494863	0.576467	1.04332	1.04296	1.11988	1	1.1649	2.10829	2.10756	2.26301	2305	3087	3486	4238	4089	3175.37	3396.21	2847.91	2909.61	2417.77	1	1.06955	0.896877	0.916307	0.761415											6416.65	5891.41	2729.67	2789.77	2158.95
b1540	ydfh, eck1533, jw1533	predicted dna-binding transcriptional regulator	0.125	0.171	0.348	0.49	0.68	0.17337	0.188638	0.303776	0.347054	0.399014	1	1.08807	1.75219	2.00181	2.30152
b1541	ydfz, eck1534, jw1534	conserved protein	0.034	0.07	0.12	0.167	0.332	0.0479748	0.0770286	0.105103	0.118487	0.195196						119			90		163.934			61.7898		1			0.376918															521.488
b1542	ydfi, eck1535, jw1535	predicted mannonate dehydrogenase	0.087	0.099	0.119	0.177	0.222	0.120716	0.109409	0.103728	0.12511	0.130253	1	0.906332	0.859273	1.03639	1.079
b1544	ydfk, eck1537, jw1537	qin prophage; predicted dna-binding transcriptional regulator	0.025	0.082	0.07	0.097	0.213	0.0353507	0.0902752	0.0614714	0.0688658	0.125225
b1545	pinq, eck1538, jw1538, ydfl	qin prophage; predicted site-specific recombinase	0.056	0.063	0.113	0.147	0.23	0.0786191	0.0694192	0.0982373	0.104359	0.134914	1		1.24953	1.3274	1.71604
b1547	stfq, eck1540, jw1540, ydfn	qin prophage; predicted side tail fibre assembly protein	0.201	0.258	0.309	0.418	0.535	0.279666	0.284308	0.269471	0.295628	0.314328	1	1.0166	0.963549	1.05708	1.12394
b1549	ydfo, eck1543, jw5252	qin prophage; predicted protein	0.005	0.005	0.009	0.014	0.027	0.006536	0.0056445	0.00823241	0.00992432	0.016147
b1550	gnsb, eck1544, jw5253, ydfy	qin prophage; predicted protein	0.144	0.26	0.749	1.038	2.121	0.200056	0.286272	0.653653	0.7344	1.24547	1	1.43096	3.26735	3.67097	6.22562	1883.5	2521	2933	2886	3212	2594.71	2773.51	2396.14	1981.39	1899.21	1	1.06891	0.92347	0.763628	0.731957											12969.9	9688.37	3665.76	2697.97	1524.89
b1551	ynfn, eck1545, jw5254	qin prophage; predicted protein	0.012	0.021	0.02	0.186	0.044	0.0167313	0.0228135	0.0172881	0.131723	0.0258352
b1552	cspi, cspj, eck1546, jw1544	qin prophage; cold shock protein	0.039	0.093	0.135	0.209	0.435	0.0548418	0.103029	0.117995	0.147665	0.255478	1	1.87865	2.15155	2.69256	4.65845
b1553	rzpq, eck1547, jw1545, rz, ydfp	qin prophage; conserved protein	0.025	0.046	0.06	0.095	0.132	0.034722	0.0512715	0.0521358	0.0670614	0.0775057
b1554	arrq, eck1548, jw1546, ydfq	qin prophage; predicted lysozyme	0.016	0.039	0.05	0.08	0.111	0.0219486	0.0431764	0.0439034	0.0568393	0.0649433
b1555	ydfr, eck1549, jw1547	qin prophage; predicted protein	0.038	0.096	0.1	0.15	0.199	0.053103	0.105972	0.0872635	0.105856	0.116614
b1556	essq, eck1550, jw5255, ydfs	qin prophage; predicted s lysis protein	0.106	0.231	0.174	0.289	0.54	0.147928	0.25426	0.1523	0.204351	0.31702	1	1.71881	1.02955	1.38142	2.14307
b1557	cspb, eck1551, jw1549	qin prophage; cold shock protein	0.021	0.175	0.125	0.16	0.846	0.0285602	0.193179	0.109079	0.113228	0.49679
b1558	cspf, eck1552, jw1550	qin prophage; cold shock protein	0.02	0.049	0.097	0.141	0.299	0.0275563	0.0534792	0.0847938	0.099541	0.175464
b1559	quuq, eck1553, jw1551, ydft	qin prophage; predicted antitermination protein q	0.04	0.077	0.105	0.133	0.197	0.0551422	0.0846307	0.0916514	0.0944345	0.115903	1	1.53477	1.66209	1.71256	2.1019
b1560	ydfu, eck1554, jw5909	qin prophage; predicted protein	0.184	0.303	0.283	0.51	0.722	0.256007	0.333614	0.246701	0.361182	0.424128	1	1.30314	0.963648	1.41083	1.65671
b1561	rem, eck1555, jw1553	qin prophage; predicted protein	0.045	0.106	0.126	0.182	0.267	0.062397	0.117254	0.110043	0.129016	0.156809	1	1.87916	1.76359	2.06767	2.51309
b1562	hokd, eck1556, jw1554, relf	qin prophage; small toxic polypeptide	0.299	0.451	0.557	0.729	0.856	0.415764	0.497481	0.486535	0.516065	0.50271	1	1.19655	1.17022	1.24124	1.20912
b1563	rele, eck1557, jw1555	qin prophage; toxin of the rele-relb toxin-antitoxin system	0.448	0.642	0.895	1.123	1.448	0.624305	0.707711	0.781256	0.794848	0.850054	1	1.1336	1.2514	1.27317	1.3616
b1564	relb, eck1558, jw1556, rc	qin prophage; bifunctional antitoxin of the rele-relb	0.336	0.456	0.731	0.872	1.401	0.467217	0.503126	0.638563	0.616815	0.822421	1	1.07686	1.36674	1.32019	1.76025	289	255		359		398.126	280.542		246.472		1	0.704655		0.619081												852.123	557.598		399.589
b1565	ydfv, eck1559, jw1557	qin prophage; predicted protein	0.029	0.071	0.091	0.12	0.155	0.0407785	0.0777645	0.0793028	0.0851056	0.0907785
b1566	flxa, eck1560, jw1558	qin prophage; predicted protein	0.245	0.638	0.812	1.181	1.579	0.340743	0.703296	0.709362	0.836052	0.927194	1	2.06401	2.08181	2.45362	2.72109
b1567	intk, eck1561, jw1559, ydfw	pseudogene	0.013	0.034	0.051	0.063	0.082	0.0175103	0.0375319	0.0441833	0.0445061	0.048441
b1568	ydfx, eck1562, jw1560	pseudogene	0.02	0.033	0.059	0.085	0.112	0.0282147	0.03606	0.0513126	0.0598437	0.0660197
b1569	dicc, eck1563, ftst, jw1561	qin prophage; dna-binding transcriptional regulator for dicb	0.015	0.029	0.057	0.078	0.104	0.021229	0.0318874	0.0493944	0.0550349	0.0610034
b1570	dica, eck1564, ftst, jw1562	qin prophage; predicted regulator for dicb	0.19	0.223	0.572	0.736	0.916	0.264884	0.245554	0.499156	0.520576	0.537878	1	0.927026	1.88443	1.9653	2.03062
b1571	ydfa, eck1565, jw1563	qin prophage; predicted protein	0.039	0.08	0.103	0.149	0.217	0.0543767	0.0886782	0.0897332	0.105108	0.127561	1	1.63081	1.65021	1.93295	2.34588
b1572	ydfb, eck1566, jw1564	qin prophage; predicted protein	0.008	0.023	0.048	0.054	0.101	0.011604	0.0250212	0.0419853	0.0378929	0.0592057
b1573	ydfc, eck1567, jw1565	qin prophage; predicted protein	0.032	0.052	0.074	0.098	0.158	0.0447967	0.0574017	0.065036	0.0694703	0.0925762
b1575	dicb, eck1569, ftst, jw1566	qin prophage; cell division inhibition protein	0.007	0.009	0.02	0.025	0.026	0.009625	0.0099349	0.0172881	0.0180442	0.0150705
b1576	ydfd, eck1570, jw1567	qin prophage; predicted protein	0.009	0.01	0.024	0.022	0.029	0.0118738	0.0110388	0.0209926	0.0157887	0.0172235
b1577	ydfe, eck1571, jw1568	pseudogene	0.029	0.023	0.043	0.059	0.069	0.0398484	0.0255143	0.0375974	0.0415017	0.0405505
b1578	insd, eck0358	pseudogene	1.353	1.382	1.785	2.893	4.292	1.88416	1.52359	1.55812	2.04772	2.52001	1	0.808634	0.826959	1.08681	1.33747
b1579	intq, eck1573, jw1571	pseudogene	0.028	0.026	0.058	0.079	0.09	0.0387698	0.0282078	0.0502177	0.0556394	0.0527469
b1580	rspb, eck1575, jw1572	predicted oxidoreductase, zn-dependent and nad(p)-binding	0.062	0.114	0.112	0.187	0.203	0.0869551	0.125349	0.0979657	0.132327	0.119488	1	1.44154	1.12662	1.52179	1.37413
b1581	rspa, eck1576, jw1573	predicted dehydratase	0.054	0.087	0.101	0.155	0.156	0.0747511	0.0956694	0.0880868	0.109465	0.091855	1	1.27984	1.1784	1.4644
b1582	ynfa, eck1577, jw1574	conserved inner membrane protein	0.233	0.382	0.431	0.673	0.836	0.323892	0.421681	0.375949	0.47607	0.490869	1	1.30192	1.16072	1.46984	1.51553
b1583	ynfb, eck1578, jw1575	predicted protein	0.6	0.52	1.46	2.036	2.584	0.836055	0.573038	1.27438	1.44083	1.51746	1	0.685407	1.52427	1.72337	1.81503	389					535.886																				640.97
b1584	speg, eck1579, jw1576	spermidine n1-acetyltransferase (ec:2,3,1,57)	0.403	0.419	1.031	1.486	1.847	0.561668	0.461664	0.900074	1.05168	1.08472	1	0.821952	1.6025	1.87242	1.93125	36	57	77	82	101	49.5936	62.7094	62.9057	56.2973	59.72	1	1.26447	1.26842	1.13517	1.20419											88.297	135.833	69.8895	53.5308	55.0555
b1585	ynfc, eck1580, jw5258	predicted protein	0.122	0.149	0.319	0.392	0.458	0.169531	0.16411	0.278255	0.277277	0.268762	1	0.968021	1.64132	1.63555	1.58532
b1586	ynfd, eck1581, jw5259	predicted protein	0.19	0.309	0.381	0.48	0.544	0.265091	0.340973	0.332318	0.339836	0.319711	1	1.28625	1.2536	1.28196	1.20604	1108.5		1542			1527.07		1259.75			1		0.824945													5760.54		3790.8
b1587	ynfe, eck1582, jw1579	oxidoreductase subunit	0.1	0.184	0.175	0.349	0.456	0.139038	0.203114	0.153123	0.246908	0.267685	1	1.46085	1.1013	1.77583	1.92527
b1588	ynff, eck1583, jw5260	oxidoreductase subunit	0.023	0.065	0.085	0.114	0.208	0.0314818	0.071627	0.07382	0.0809013	0.121996
b1589	ynfg, eck1584, jw1581	oxidoreductase, fe-s subunit	0.039	0.064	0.082	0.118	0.195	0.0539117	0.0706482	0.0713503	0.0836079	0.114461	1				2.12312
b1590	ynfh, eck1585, jw5261	oxidoreductase, membrane subunit	0.036	0.084	0.11	0.154	0.279	0.0500149	0.0922327	0.0960475	0.10887	0.163623
b1591	dmsd, eck1586, jw5262, ynfi	twin-argninine leader-binding protein for dmsa and tora	0.076	0.127	0.226	0.326	0.512	0.105396	0.139582	0.197578	0.230362	0.30069	1	1.32436	1.87463	2.18569	2.85296
b1592	clcb, eck1587, jw5263, mrit, ynfj	predicted voltage-gated chloride channel	0.054	0.093	0.115	0.174	0.258	0.0756804	0.102536	0.100164	0.122998	0.151782	1	1.35485	1.32351	1.62524	2.00557
b1593	ynfk, eck1588, jw5264	predicted dethiobiotin synthetase	0.084	0.116	0.173	0.184	0.314	0.117389	0.128293	0.151205	0.130523	0.184431	1	1.09289	1.28806	1.11188	1.57111
b1594	dgsa, eck1589, jw1586, mlc	dna-binding transcriptional repressor	0.481	0.498	0.998	1.431	1.712	0.669283	0.549489	0.87154	1.01289	1.00507	1	0.821011	1.3022	1.51339	1.50171	37	95	62			50.9712	104.516	50.6514			1	2.05048	0.993725													76.1579	190.205	58.117
b1595	ynfl, eck1590, jw1587	predicted dna-binding transcriptional regulator	0.042	0.058	0.098	0.144	0.181	0.0589203	0.0642678	0.0853454	0.101652	0.10657	1		1.44849	1.72525
b1596	ynfm, eck1591, jw1588, yzyc	predicted transporter	0.056	0.092	0.125	0.184	0.274	0.0782899	0.101314	0.108939	0.130216	0.161115	1	1.29409	1.39149	1.66326	2.05793
b1597	asr, eck1592, jw5826	acid shock-inducible periplasmic protein	0.062	0.085	0.133	0.186	0.258	0.0865044	0.0941976	0.116077	0.131723	0.151782	1	1.08893	1.34186	1.52273	1.75461
b1598	ydgd, eck1593, jw1590	predicted peptidase	0.165	0.358	0.295	0.388	0.422	0.229831	0.394452	0.257403	0.27457	0.247587	1	1.71628	1.11997	1.19466	1.07726
b1599	mdti, eck1594, jw1591, ydge	multidrug efflux system transporter	0.023	0.032	0.051	0.088	0.169	0.0318731	0.0358172	0.044455	0.0625503	0.099035
b1600	mdtj, eck1595, jw1592, ydgf	multidrug efflux system transporter	0.074	0.107	0.127	0.222	0.426	0.103266	0.117747	0.110866	0.156985	0.250096	1	1.14023	1.07359	1.52019	2.42185
b1601	tqsa, eck1596, jw1593, ydgg	predicted inner membrane protein	0.088	0.155	0.189	0.278	0.397	0.122006	0.171226	0.164648	0.196682	0.233238	1	1.40342	1.34951	1.61206	1.91169
b1602	pntb, eck1597, jw1594	pyridine nucleotide transhydrogenase, beta subunit (ec:1,6,1,2)	0.486	1.377	1.855	2.771	4.747	0.676448	1.51844	1.61931	1.96111	2.78733	1	2.24473	2.39385	2.89913	4.12053	906.5	1575	2502	2823	4492	1248.79	1732.76	2044.03	1938.14	2656.06	1	1.38755	1.6368	1.55201	2.1269											1846.1	1141.14	1262.28	988.287	952.906
b1603	pnta, eck1598, jw1595	pyridine nucleotide transhydrogenase, alpha subunit (ec:1,6,1,2)	0.925	1.672	3.232	5.063	8.913	1.28771	1.84323	2.8218	3.58329	5.23378	1	1.4314	2.19133	2.78268	4.06441	786	1249	1818	2237.5	3061	1082.79	1374.11	1485.23	1536.16	1809.93	1	1.26904	1.37166	1.4187	1.67154											840.867	745.486	526.341	428.702	345.817
b1604	ydgh, eck1599, jw1596	predicted protein	0.267	0.285	0.812	1.018	1.433	0.371806	0.313744	0.70881	0.720569	0.841442	1	0.843838	1.9064	1.93802	2.26312	2255.5	2866.5	3767.5	3859	4243.5	3107.18	3153.62	3077.89	2649.41	2509.13	1	1.01495	0.990574	0.852674	0.807527											8356.97	10051.6	4342.33	3676.83	2981.94
b1605	ydgi, arcd, eck1600, jw1597	predicted arginine/ornithine antiporter transporter	0.07	0.109	0.147	0.208	0.277	0.0970596	0.119955	0.128426	0.147358	0.162902	1	1.23589	1.32316	1.51822	1.67837
b1606	folm, eck1601, jw1598, ydgb	dihydrofolate reductase isozyme (ec:1,5,1,3)	0.106	0.162	0.307	0.413	0.492	0.147794	0.178335	0.268105	0.292614	0.288848	1	1.20665	1.81404	1.97988	1.9544
b1607	ydgc, eck1602, jw1599	conserved inner membrane protein associated with alginate	0.087	0.171	0.291	0.345	0.47	0.121018	0.188638	0.25411	0.243895	0.275931	1	1.55876	2.09977	2.01536	2.28009
b1608	rsta, eck1603, jw1600, urpt	dna-binding response regulator in two-component regulatory system	0.194	0.119	0.339	0.471	0.557	0.269468	0.131236	0.295815	0.333214	0.326891	1	0.48702	1.09777	1.23656	1.2131	78	84	77	68	81	107.453	92.4138	62.9057	46.6856	47.8943	1	0.860041	0.585427	0.434475	0.445724											398.758	704.178	212.652	140.107	146.515
b1609	rstb, eck1604, jw1601, uspt	sensory histidine kinase in two-component regulatory system with	0.08	0.113	0.162	0.216	0.258	0.111002	0.124863	0.141597	0.153078	0.151782	1	1.12487	1.27563	1.37905	1.36738
b1610	tus, eck1605, jw1602, tau	inhibitor of replication at ter, dna-binding protein	0.077	0.121	0.194	0.284	0.346	0.106804	0.133937	0.169036	0.201193	0.203452	1	1.25404	1.58267	1.88376	1.90491
b1611	fumc, eck1606, jw1603	fumarate hydratase (fumarase c),aerobic class ii (ec:4,2,1,2)	0.604	0.867	0.916	0.863	0.501	0.841453	0.955959	0.799638	0.611095	0.294231	1	1.13608	0.950306	0.726237	0.34967	2742.5					3778.07										1.30423	2.27533	2.75285	2.82401	2.79801	1	1.74458	2.11071	2.16527	2.14533	4489.93					17.3181
b1612	fuma, eck1607, jw1604	fumarate hydratase (fumarase a), aerobic class i (ec:4,2,1,2)	0.923	2.125	2.555	2.834	1.498	1.2857	2.34292	2.23125	2.00532	0.879474	1	1.82229	1.73544	1.55971	0.684042	858	1799.5	2985	2719.5	2080	1181.98	1979.75	2438.62	1867.08	1229.88	1	1.67494	2.06316	1.57962	1.04052	1.30423	2.27533	2.75285	2.82401	2.79801	1	1.74458	2.11071	2.16527	2.14533	919.327	844.99	1092.94	931.065	1398.42	55.3553	57.6568
b1613	mana, eck1608, jw1605, pmi	mannose-6-phosphate isomerase (ec:5,3,1,8)	0.156	0.198	0.561	0.837	1.129	0.216787	0.218075	0.489557	0.592455	0.662749	1	1.00594	2.25823	2.73289	3.05714	692	945	1212	1300	1553.5	953.299	1039.66	990.152	892.519	918.565	1	1.09059	1.03866	0.936242	0.963564											4397.39	4767.42	2022.55	1506.47	1385.99
b1614	ydga, eck1609, jw1606	conserved protein	0.464	1.123	1.486	2.129	3.259	0.645684	1.23806	1.29743	1.50699	1.9136	1	1.91744	2.00938	2.33394	2.96368	1186	1232.5	1677.5	1994.5	2259	1633.83	1355.95	1370.45	1369.33	1335.72	1	0.829921	0.838792	0.838109	0.817536											2530.39	1095.22	1056.28	908.652	698.012
b1615	uidc, eck1610, gusc, jw1607	predicted outer membrane porin protein	0.074	0.137	0.129	0.221	0.296	0.102996	0.151356	0.112784	0.156687	0.173666	1	1.46953	1.09503	1.52129	1.68614
b1616	uidb, eck1611, gusb, jw1608, uidp	glucuronide transporter	0.023	0.033	0.041	0.055	0.078	0.0315736	0.0363029	0.0359509	0.0390928	0.0455669
b1617																		149					205.262
b1618	uidr, eck1613, gusr, jw1610	dna-binding transcriptional repressor	0.152	0.39	0.363	0.432	0.764	0.211301	0.429534	0.316948	0.305552	0.448887	1	2.0328	1.49998	1.44605	2.12439
b1619	hdha, eck1614, hsd, hsdh, jw1611	7-alpha-hydroxysteroid dehydrogenase, nad-dependent (ec:1,1,1,159)	0.448	0.377	0.846	1.217	1.585	0.624515	0.416037	0.738719	0.861314	0.930423	1	0.666176	1.18287	1.37917	1.48983	1384	1106.5	1204.5	1307.5	1450	1906.6	1217.33	984.025	897.668	857.366	1	0.638484	0.516116	0.470822	0.449684											3052.93	2926.02	1332.07	1042.21	921.48
b1620	mali, eck1615, jw1612	dna-binding transcriptional repressor	0.11	0.191	0.188	0.253	0.339	0.15358	0.210716	0.164376	0.178936	0.198791	1	1.37203	1.0703	1.1651	1.29438
b1621	malx, eck1616, jw1613	fused maltose and glucose-specific pts enzymes: iib component, iic	0.038	0.065	0.128	0.178	0.111	0.0525921	0.071627	0.111409	0.126012	0.0653093
b1622	maly, eck1617, jw1614	bifunctional beta-cystathionase, plp-dependent/regulator of maltose	0.086	0.132	0.258	0.361	0.349	0.120328	0.145712	0.225568	0.255624	0.204884	1	1.21096	1.87461	2.12439	1.70272																0.0096404	0.019992	0.032116	0.0448	0.0565824	1	2.07377	3.3314	4.64711	5.8693
b1623	add, eck1618, jw1615	adenosine deaminase (ec:3,5,4,4)	0.114	0.166	0.242	0.264	0.269	0.158917	0.183244	0.211021	0.187055	0.157885	1	1.15308	1.32787	1.17707	0.99351	319	359.5	340	295	257.5	439.454	395.509	277.765	202.533	152.256	1	0.9	0.632069	0.460874	0.346467											2765.31	2158.38	1316.29	1082.74	964.347
b1624	ydgj, eck1619, jw5265	predicted oxidoreductase	0.225	0.267	0.503	0.666	0.822	0.313787	0.29461	0.439339	0.471252	0.482613	1	0.938888	1.40012	1.50182	1.53803	232	213	140	132	125	319.603	234.335	114.374	90.625	73.9109	1	0.733206	0.357863	0.283555	0.231258											1018.54	795.406	260.332	192.307	153.147
b1625	cnu, eck1621, jw1617, ydgt	predicted regulator	0.023	0.026	0.165	0.24	0.247	0.0318884	0.0287008	0.143656	0.170067	0.145323
b1626	ydgk, eck1622, jw1618, rsxp	conserved inner membrane protein	0.08	0.067	0.273	0.34	0.367	0.110942	0.0735919	0.23874	0.240593	0.215293	1	0.663336	2.15193	2.16863	1.94059
b1627	rsxa, eck1623, jw1619, rnfa, ydgl	predicted inner membrane subunit	0.189	0.145	0.432	0.548	0.717	0.262874	0.159937	0.377044	0.387653	0.420899	1	0.608418	1.43432	1.47467	1.60114
b1628	rsxb, eck1624, jw1620, rnfb, ydgm	predicted iron-sulfur protein	0.251	0.36	0.531	0.798	1.25	0.349978	0.396903	0.463485	0.564487	0.734151	1	1.13408	1.32432	1.61292	2.0977
b1629	rsxc, eck1625, jw1621, rnfc, ydgn	fused predicted 4fe-4s ferredoxin-type protein/conserved protein	0.072	0.161	0.308	0.439	0.718	0.100508	0.177599	0.2692	0.310361	0.42162	1	1.76701	2.67838	3.08791	4.19487
b1630	rsxd, eck1626, jw1622, rnfd, ydgo	predicted inner membrane oxidoreductase	0.068	0.175	0.234	0.313	0.54	0.0953208	0.192811	0.204435	0.221646	0.317203	1	2.02276	2.14471	2.32527	3.32774
b1631	rsxg, eck1627, jw1623, rnfg, ydgp	predicted oxidoreductase	0.068	0.206	0.266	0.381	0.557	0.0950806	0.226663	0.232426	0.269761	0.326891	1	2.3839	2.44451	2.83718	3.43804
b1632	rsxe, eck1628, jw1624, rnfe, ydgq	predicted inner membrane nadh-quinone reductase	0.067	0.2	0.266	0.39	0.612	0.0930126	0.220776	0.232154	0.276077	0.35954	1	2.37361	2.49594	2.96817	3.8655
b1633	nth, eck1629, jw1625	dna glycosylase and apyrimidinic (ap) lyase (endonuclease iii)	0.06	0.217	0.289	0.409	0.686	0.0841369	0.238931	0.252463	0.28961	0.402954	1	2.83979	3.00063	3.44213	4.78927
b1634	tppb, dtpa, eck1630, jw1626, ydgr	predicted transporter	0.052	0.103	0.132	0.183	0.248	0.072532	0.113825	0.114982	0.129621	0.145678	1	1.5693	1.58526	1.78708	2.00847
b1635	gst, eck1631, jw1627	glutathionine s-transferase (ec:2,5,1,18)	0.885	0.847	1.515	2.125	1.845	1.2323	0.934124	1.3224	1.50369	1.08365	1	0.758033	1.07311	1.22023	0.87937	1654.5	1918.5	2226	2143.5	2329	2279.24	2110.66	1818.55	1471.63	1377.11	1	0.92604	0.797875	0.645666	0.604197											1849.58	2259.51	1375.19	978.677	1270.81
b1636	pdxy, eck1632, jw1628, ydgs	pyridoxal kinase 2/pyridoxine kinase (ec:2,7,1,35)	0.063	0.114	0.233	0.33	0.623	0.088004	0.125599	0.203612	0.233375	0.365999	1	1.4272	2.31367	2.65187	4.15889
b1637	tyrs, eck1633, jw1629	tyrosyl-trna synthetase (ec:6,1,1,1)	0.346	0.412	0.925	1.278	2.097	0.48143	0.454555	0.807599	0.904313	1.23148	1	0.944177	1.6775	1.87839	2.55796	602	839	1150.5	1446.5	1779.5	829.315	923.038	939.909	993.099	1052.2	1	1.11301	1.13336	1.19749	1.26875	0.0185693	0.0348684	0.0505176	0.063952	0.0757075	1	1.87774	2.72049	3.44396	4.07702	1722.61	2030.64	1163.83	1098.18	854.416	1.12329	1.89508
b1638	pdxh, eck1634, jw1630	pyridoxine 5'-phosphate oxidase (ec:1,4,3,5)	0.282	0.268	0.838	1.124	1.649	0.393215	0.295103	0.731861	0.79575	0.968465	1	0.750488	1.86122	2.0237	2.46294	424	554	667	773.5	922	584.102	609.491	544.91	531.049	545.167	1	1.04347	0.932903	0.909171	0.933341											1485.45	2065.35	744.555	667.356	562.918
b1639	mlic, eck1635, jw1631, ydha	predicted lipoprotein	0.054	0.117	0.164	0.214	0.323	0.0757703	0.128786	0.143244	0.151571	0.189813	1	1.69969	1.8905	2.00041	2.50512
b1640	anmk, eck1636, jw1632, ydhh	conserved protein	0.19	0.307	0.314	0.468	0.483	0.263893	0.338523	0.274411	0.331112	0.283832	1	1.2828	1.03986	1.25472	1.07556	120	150	135	101.5	125	165.312	165.025	110.289	69.6851	73.9109	1	0.998262	0.667158	0.421537	0.4471											626.435	487.485	401.913	210.458	260.404
b1641	slyb, eck1637, jw1633	outer membrane lipoprotein	1.346	1.406	2.83	3.581	4.597	1.87388	1.55034	2.47082	2.53401	2.69906	1	0.827342	1.31856	1.35228	1.44036	726.5	912	1102.5	1172.5	793	1000.83	1003.35	900.695	804.983	468.891	1	1.00252	0.899952	0.804319	0.468504											534.094	647.181	364.533	317.671	173.724
b1642	slya, eck1638, jw5267	dna-binding transcriptional activator	0.335	0.595	0.927	1.224	1.882	0.466977	0.656197	0.809246	0.866123	1.10481	1	1.4052	1.73295	1.85474	2.36588	435	554.5	765	766	963.5	599.256	610.041	624.972	525.899	569.705	1	1.018	1.04291	0.877588	0.950688											1283.27	929.662	772.29	607.188	515.659
b1643	ydhi, eck1639, jw1635	predicted inner membrane protein	0.021	0.046	0.106	0.15	0.191	0.0298645	0.0507784	0.092203	0.10601	0.111953
b1644	ydhj, eck1640, jw1636	undecaprenyl pyrophosphate phosphatase	0.031	0.036	0.087	0.126	0.175	0.0428186	0.0394968	0.0760098	0.0893189	0.102986
b1645	ydhk, eck1641, jw1637	conserved inner membrane protein	0.051	0.105	0.114	0.168	0.227	0.0713023	0.116275	0.0996121	0.119092	0.133482	1	1.63073	1.39704	1.67024	1.87206
b1646	sodc, eck1642, jw1638	superoxide dismutase, cu, zn (ec:1,15,1,1)	0.713	0.904	1.072	1.376	1.373	0.993053	0.996927	0.936296	0.973784	0.806274	1	1.0039	0.942846	0.980596	0.811914	1061	612	653	631	686	1461.63	673.3	533.473	433.215	405.623	1	0.460649	0.364984	0.296391	0.277514											1471.86	675.376	569.769	444.878	503.083
b1647	ydhf, eck1643, jw1639	predicted oxidoreductase	0.294	0.389	0.438	0.541	0.719	0.409049	0.428798	0.382807	0.382538	0.421975	1	1.04828	0.935846	0.935188	1.0316	1343	1136.5	980.5	837.5	727.5	1850.12	1250.34	801.027	574.988	430.161	1	0.675815	0.43296	0.310785	0.232505											4522.97	2915.91	2092.51	1503.09	1019.4
b1648	ydhl, eck1644, jw5827	conserved protein	0.09	0.137	0.191	0.243	0.281	0.125035	0.151599	0.167118	0.171871	0.165238	1	1.21245	1.33657	1.37458	1.32153
b1649	nemr, eck1645, jw5874, ydhm	predicted dna-binding transcriptional regulator	0.058	0.069	0.167	0.246	0.326	0.0804182	0.0765356	0.145985	0.173829	0.191256	1	0.951719	1.81533	2.16156	2.37827
b1650	nema, eck1646, jw1642, ydhn	n-ethylmaleimide reductase, fmn-linked (ec:1,-,-,-)	0.096	0.201	0.32	0.494	0.733	0.13379	0.221269	0.27963	0.34976	0.430587	1	1.65385	2.09007	2.61424	3.21838
b1651	gloa, eck1647, jw1643	glyoxalase i, ni-dependent (ec:4,4,1,5)	0.197	0.315	0.824	1.038	1.692	0.274416	0.347847	0.719512	0.734698	0.993224	1	1.26759	2.62198	2.67731	3.61941	791	758		1279	1284	1089.68	833.924		878.101	759.213	1	0.765292		0.805833	0.696729											3970.91	2397.39		1195.19	764.392
b1652	rnt, eck1648, jw1644	ribonuclease t (rnase t) (ec:3,1,13,-)	0.088	0.072	0.303	0.415	0.654	0.122936	0.0794792	0.264532	0.293516	0.383944	1	0.646512	2.15179	2.38756	3.12313
b1653	lhr, eck1649, jw1645, rhlf	predicted atp-dependent helicase	0.101	0.21	0.195	0.279	0.354	0.141077	0.232057	0.170683	0.197584	0.208113	1	1.64489	1.20985	1.40054	1.47517
b1654	grxd, eck1650, jw1646, ydhd	conserved protein	0.643	0.58	1.666	2.61	3.817	0.895934	0.63902	1.45439	1.84712	2.24121	1	0.713245	1.62333	2.06167	2.50153	2325	2751.5	4203.5	5332	7647	3202.92	3027.1	3434.08	3660.7	4521.57	1	0.945107	1.07217	1.14293	1.4117											3574.95	4737.1	2361.17	1981.84	2017.47
b1655	ydho, eck1651, jw5270	predicted lipoprotein	0.142	0.085	0.419	0.543	0.57	0.197897	0.0939548	0.365519	0.384342	0.334781	1	0.474766	1.84701	1.94213	1.69169
b1656	sodb, eck1652, jw1648	superoxide dismutase, fe (ec:1,15,1,1)	0.958	2.252	2.887	3.731	5.035	1.3341	2.48299	2.52049	2.64017	2.95633	1	1.86118	1.88929	1.97899	2.21598	2701.5	4276	7354	7949.5	8647	3721.59	4704.3	6007.9	5457.75	5112.86	1	1.26406	1.61434	1.46651	1.37384											2789.59	1894.61	2383.62	2067.2	1729.46
b1657	ydhp, eck1653, jw1649	predicted transporter	0.067	0.111	0.187	0.246	0.459	0.093492	0.122163	0.163553	0.174425	0.269472	1	1.30666	1.74938	1.86566	2.8823
b1658	purr, eck1654, jw1650	dna-binding transcriptional repressor, hypoxanthine-binding	0.303	0.151	0.848	1.131	1.708	0.421881	0.166811	0.740093	0.800559	1.00291	1	0.395398	1.75427	1.8976	2.37724	924.5	1089.5	1238.5	1260.5	1758.5	1273.59	1198.63	1011.8	865.4	1039.78	1	0.941141	0.794448	0.679496	0.816415											3018.84	7185.56	1367.13	1080.99	1036.76
b1659	ydhb, eck1655, jw1651	predicted dna-binding transcriptional regulator	0.053	0.068	0.151	0.207	0.237	0.0744822	0.0750637	0.131447	0.146763	0.13922	1	1.00781	1.76481	1.97044	1.86917
b1660	ydhc, eck1656, jw1652	predicted transporter	0.031	0.121	0.086	0.104	0.165	0.0431776	0.132958	0.0754665	0.0736836	0.0968821
b1661	cfa, cdfa, eck1657, jw1653	cyclopropane fatty acyl phospholipid synthase	1.213	1.32	2.051	2.936	4.239	1.68869	1.45515	1.79082	2.07809	2.48915	1	0.861705	1.06048	1.23059	1.47401	86.5	112	199.5	194	269	119.162	123.218	162.983	133.191	159.056	1	1.03404	1.36774	1.11773	1.33479											70.5649	84.6772	91.0102	64.0931	63.8999
b1662	ribc, eck1658, jw1654, ribe	riboflavin synthase, alpha subunit (ec:2,5,1,9)	0.237	0.299	0.767	1.042	1.479	0.330249	0.330185	0.669295	0.737107	0.868354	1	0.999805	2.02664	2.23197	2.62939	241	354	575.5	693	836.5	332.001	389.458	470.159	475.781	494.612	1	1.17306	1.41613	1.43307	1.48979											1005.31	1179.52	702.469	645.471	569.597
b1663	mdtk, eck1659, jw1655, norm, ydhe	multidrug efflux system transporter	0.135	0.188	0.409	0.519	0.647	0.187793	0.207772	0.356735	0.367498	0.379638	1	1.10639	1.89962	1.95693	2.02158
b1664	ydhq, eck1660, jw1656	conserved protein	0.339	0.413	0.789	1.141	1.443	0.472613	0.455291	0.688781	0.807479	0.84718	1	0.963347	1.45739	1.70854	1.79254
b1665	valv, eck1661, jwr0031	trna-val	1.024	0.505	2.268	2.918	2.29	1.42648	0.557091	1.97989	2.06516	1.34451	1	0.390536	1.38796	1.44773	0.942536																0.0397166	0.075558	0.111104	0.1428	0.17089	1	1.90243	2.79742	3.59547	4.30272
b1666	valw, eck1662, jwr0032	trna-val	1.764	0.744	3.282	4.953	3.806	2.45572	0.819814	2.8657	3.50509	2.23475	1	0.333838	1.16695	1.42731	0.910015																0.0397166	0.075558	0.111104	0.1428	0.17089	1	1.90243	2.79742	3.59547	4.30272
b1667	ydhr, eck1663, jw1657	predicted protein	0.351	0.677	1.029	1.161	1.892	0.489016	0.746958	0.898156	0.82131	1.11091	1	1.52747	1.83666	1.67952	2.27174	2494.5	3104.5	3426	3229	3277.5	3436.42	3415.46	2798.9	2216.88	1937.94	1	0.9939	0.81448	0.645113	0.563942											7027.22	4572.49	3116.27	2699.2	1744.46
b1668	ydhs, eck1664, jw1658	conserved protein with fad/nad(p)-binding domain	0.125	0.205	0.243	0.309	0.419	0.17451	0.22642	0.212396	0.218633	0.246156	1	1.29746	1.2171	1.25284	1.41055	108	99	106.5	103.5	104	148.781	108.916	87.0059	71.0582	61.4939	1	0.732059	0.584793	0.477604	0.413319											852.562	481.036	409.64	325.012	249.817
b1669	ydht, eck1665, jw1659	conserved protein	0.028	0.046	0.067	0.082	0.109	0.0395488	0.0507784	0.0581784	0.0577415	0.0642328
b1670	ydhu, eck1666, jw1660	predicted cytochrome	0.042	0.072	0.1	0.134	0.177	0.05895	0.0789862	0.0869919	0.0950299	0.104062	1	1.33988	1.47569	1.61204
b1671	ydhx, eck1667, jw5271	predicted 4fe-4s ferridoxin-type protein	0.038	0.038	0.067	0.087	0.107	0.0529537	0.0414543	0.0584501	0.0616481	0.0627903
b1672	ydhw, eck1668, jw1662	predicted protein	0.041	0.054	0.076	0.098	0.113	0.0575701	0.0591164	0.0666825	0.0691725	0.0663857
b1673	ydhv, eck1669, jw5272	predicted oxidoreductase	0.018	0.05	0.062	0.081	0.125	0.0255773	0.0547008	0.0543339	0.0574438	0.073555
b1674	ydhy, eck1670, jw1664	predicted 4fe-4s ferridoxin-type protein	0.013	0.017	0.022	0.065	0.051	0.0179313	0.018398	0.0194861	0.0463105	0.0301411
b1675	ydhz, eck1671, jw1665	predicted protein	0.121	0.251	0.304	0.449	0.701	0.168617	0.276338	0.265084	0.317578	0.411749	1	1.63884	1.5721	1.88343	2.44191	233	223	238	379	513	320.981	245.337	194.436	260.204	303.33	1	0.764334	0.605756	0.810652	0.945011											1903.6	887.815	733.489	819.336	736.688
b1676	pykf, eck1672, jw1666	pyruvate kinase i (ec:2,7,1,40)	1.455	1.012	2.842	4.102	6.587	2.02545	1.11639	2.4818	2.90302	3.86775	1	0.551181	1.22531	1.43327	1.90958	5558.5	5417	7152	8097	9967	7657.39	5959.59	5842.88	5559.02	5893.36	1	0.77828	0.763038	0.725968	0.769631	0.540559	0.80215	0.740911	0.62586	0.602945	1	1.48393	1.37064	1.1578	1.11541	3780.59	5338.27	2354.29	1914.91	1523.72	3.54142	6.75234
b1677	lpp, eck1673, jw1667, mlpa, muli	murein lipoprotein	1.485	5.793	8.302	12.402	19.215	2.06829	6.38704	7.24864	8.77671	11.283	1	3.08807	3.50464	4.24345	5.45521	2414.5	6458.5	8926.5	9913	8891	3326.21	7105.41	7292.57	6805.8	5257.13	1	2.13619	2.19245	2.04611	1.58052											1608.19	1112.47	1006.06	775.438	465.934
b1678	ynhg, eck1674, jw1668	murein l,d-transpeptidase	0.27	0.694	0.78	1.077	1.293	0.376544	0.764863	0.681372	0.762071	0.759265	1	2.03127	1.80954	2.02385	2.0164	193.5	182	343	385	607	266.566	200.23	280.216	264.323	358.911	1	0.751147	1.05121	0.991587	1.34643											707.926	261.785	411.253	346.848	472.709
b1679	sufe, eck1675, jw1669, ynha	sulfur acceptor protein	0.143	0.356	0.35	0.445	0.681	0.199126	0.392488	0.305694	0.315169	0.400091	1	1.97105	1.53518	1.58276	2.00923
b1680	sufs, csdb, eck1676, jw1670, ynhb	selenocysteine lyase, plp-dependent (ec:4,4,1,16)	0.161	0.358	0.344	0.45	0.72	0.224043	0.395188	0.300755	0.318778	0.423052	1	1.7639	1.3424	1.42284	1.88826	612	612	706	675	598	843.091	673.3	576.772	463.423	353.59	1	0.79861	0.684116	0.549672	0.419397											3763.08	1703.75	1917.75	1453.75	835.807
b1681	sufd, eck1677, jw1671, ynhc	component of sufbcd complex	0.249	0.448	0.466	0.733	0.935	0.34617	0.493802	0.406681	0.518474	0.548998	1	1.42647	1.1748	1.49774	1.58592
b1682	sufc, eck1678, jw1672, ynhd	component of sufbcd complex, atp-binding component of abc	0.201	0.4	0.443	0.607	0.883	0.279725	0.441551	0.386372	0.429453	0.518502	1	1.57852	1.38126	1.53527	1.85361	181.5	154	189.5	218.5	236.5	250.034	169.425	154.813	150.012	139.839	1	0.677608	0.619169	0.599965	0.559281											893.858	383.705	400.685	349.309	269.699
b1683	sufb, eck1679, jw5273, ynhe	component of sufbcd complex	0.259	0.504	0.532	0.725	0.984	0.360921	0.555376	0.464579	0.512754	0.578063	1	1.53877	1.2872	1.42068	1.60163
b1684	sufa, eck1680, jw1674, ydic	fe-s cluster assembly protein	0.248	0.402	0.496	0.677	0.865	0.345181	0.443266	0.432753	0.479372	0.507737	1	1.28415	1.2537	1.38875	1.47093
b1685	ydih, eck1682, jw1675	predicted protein	0.468	0.605	1.133	1.422	2.338	0.651981	0.667236	0.989264	1.00657	1.37285	1	1.0234	1.51732	1.54386	2.10566
b1686	ydii, eck1683, jw1676	conserved protein	0.198	0.592	0.537	0.714	1.14	0.276097	0.652267	0.468696	0.505536	0.669207	1	2.36245	1.69758	1.83101	2.42381	218	361.5	566	527	774	300.317	397.709	462.398	361.813	457.656	1	1.3243	1.5397	1.20477	1.52391											1087.72	609.734	986.563	715.702	683.878
b1687	ydij, eck1684, jw1677	predicted fad-linked oxidoreductase	0.322	0.81	0.903	1.403	2.301	0.447937	0.893163	0.788665	0.993037	1.35097	1	1.99395	1.76066	2.21691	3.01598	219.5	305	433.5	471.5	545	302.383	335.55	354.151	323.71	322.252	1	1.10969	1.1712	1.07053	1.06571											675.058	375.688	449.051	325.979	238.534
b1688	ydik, eck1685, jw1678	predicted inner membrane protein	0.114	0.154	0.258	0.345	0.382	0.159307	0.169504	0.225016	0.243895	0.22426	1	1.06401	1.41247	1.53097	1.40772
b1689	ydil, eck1687, jw1679	conserved protein	0.021	0.053	0.048	0.046	0.087	0.0287257	0.0583804	0.0417136	0.0327773	0.0513152
b1690	ydim, eck1688, jw1680	predicted transporter	0.012	0.012	0.02	0.027	0.034	0.0162815	0.0134894	0.0178396	0.0189464	0.0197316
b1691	ydin, eck1689, jw5274	predicted transporter	0.03	0.06	0.058	0.096	0.112	0.0412876	0.0662327	0.0510409	0.0676658	0.0660197						104					143.27
b1692	ydib, eck1690, jw1682	quinate/shikimate 5-dehydrogenase, nad(p)-binding (ec:1,1,1,25)	0.024	0.031	0.058	0.074	0.117	0.032743	0.0338523	0.0510409	0.0523283	0.0688939																					0.0460924	0.0864864	0.125197	0.158352	0.187341	1	1.87637	2.71621	3.43553	4.06447
b1693	arod, eck1691, jw1683	3-dehydroquinate dehydratase (ec:4,2,1,10)	0.124	0.146	0.383	0.544	0.747	0.17313	0.160673	0.334787	0.385244	0.438477	1	0.928048	1.93373	2.22517	2.53264	148.5	221	248	234.5	294.5	204.574	243.136	202.605	160.997	174.134	1	1.1885	0.990379	0.786987	0.851205	0.0460924	0.0864864	0.125197	0.158352	0.187341	1	1.87637	2.71621	3.43553	4.06447	1181.62	1513.24	605.176	417.908	397.133	11.303	17.8449
b1694	ydif, eck1692, jw1684	fused predicted acetyl-coa:acetoacetyl-coa transferase: alpha	0.048	0.075	0.081	0.123	0.17	0.0672841	0.0824229	0.070527	0.08691	0.0997562	1	1.225
b1695	ydio, eck1693, jw5275	predicted acyl-coa dehydrogenase	0.036	0.063	0.066	0.11	0.137	0.050793	0.0696694	0.0578985	0.0781946	0.0803798
b1696	ydip, eck1694, jw1686	predicted dna-binding transcriptional regulator	0.06	0.07	0.151	0.203	0.214	0.0838958	0.0767784	0.13227	0.143749	0.125947	1	0.915164	1.5766	1.71343	1.50123
b1697	ydiq, eck1695, jw5276	conserved protein	0.02	0.044	0.059	0.097	0.116	0.0283353	0.0480776	0.0513126	0.0688658	0.0681727
b1698	ydir, eck1696, jw1688	predicted electron transfer flavoprotein, fad-binding	0.036	0.059	0.079	0.11	0.142	0.0507633	0.064518	0.0691522	0.0778879	0.0836092
b1699	ydis, eck1697, jw1689	predicted oxidoreductase with fad/nad(p)-binding domain	0.034	0.045	0.073	0.096	0.128	0.047525	0.0497996	0.0639411	0.0676658	0.0753527
b1700	ydit, eck1698, jw1690	predicted 4fe-4s ferredoxin-type protein	0.026	0.031	0.055	0.065	0.087	0.0356512	0.0343453	0.047748	0.0463105	0.0509492
b1701	fadk, eck1699, jw5910, ydid	short chain acyl-coa synthetase, anaerobic	0.053	0.123	0.127	0.188	0.247	0.0732219	0.135166	0.111138	0.132923	0.145323	1	1.84598	1.51782	1.81534	1.98469
b1702	pps, eck1700, jw1692, ppsa	phosphoenolpyruvate synthase (ec:2,7,9,2)	0.673	0.909	1.142	1.166	1.322	0.937643	1.00183	0.997216	0.824919	0.776488	1	1.06845	1.06354	0.879779	0.828128	1125	1574	1362.5	1001	1038	1549.8	1731.66	1113.1	687.239	613.756	1	1.11734	0.718225	0.443438	0.396023											1652.87	1728.5	1116.21	833.099	790.426
b1703	ydia, eck1701, jw1693	conserved protein	0.16	0.183	0.448	0.615	0.67	0.222125	0.202135	0.390768	0.435164	0.393632	1	0.910004	1.75922	1.95909	1.77212	116	141	172	178	214	159.802	155.123	140.517	122.206	126.535	1	0.970724	0.87932	0.764739	0.791829											719.421	767.424	359.591	280.829	321.456
b1704	aroh, eck1702, jw1694	3-deoxy-d-arabino-heptulosonate-7-phosphate synthase, tryptophan	0.073	0.058	0.388	0.646	1.071	0.102037	0.0637821	0.338352	0.457123	0.629012	1		3.31598	4.47999	6.16457																0.0460924	0.0864864	0.125197	0.158352	0.187341	1	1.87637	2.71621	3.43553	4.06447
b1705	ydie, eck1703, jw1695	conserved protein	0.029	0.101	0.091	0.13	0.279	0.039879	0.110881	0.0795827	0.0923233	0.163978
b1706	ydiu, eck1704, jw1696	conserved protein	0.114	0.328	0.325	0.412	0.662	0.159126	0.361829	0.283467	0.291712	0.388605	1	2.27385	1.78139	1.83321	2.44211
b1707	ydiv, eck1705, jw1697	conserved protein	0.022	0.045	0.102	0.157	0.262	0.0311535	0.0495494	0.0886383	0.110972	0.15358
b1708	nlpc, eck1706, jw1698	predicted lipoprotein	0.262	0.204	0.644	0.753	0.626	0.36446	0.224455	0.562545	0.532909	0.367431	1	0.615857	1.5435	1.46219	1.00815
b1709	btud, eck1707, jw1699	vitamin b12 transporter subunit : atp-binding component of abc	0.136	0.145	0.335	0.429	0.577	0.189951	0.159694	0.292802	0.303441	0.338732	1	0.840715	1.54146	1.59747	1.78326
b1710	btue, eck1708, jw1700	predicted glutathione peroxidase	0.501	0.369	0.922	1.166	1.767	0.697138	0.407206	0.804858	0.825226	1.03771	1	0.584111	1.15452	1.18373	1.48854	2132.5	1956	2441.5	2328	2410.5	2937.73	2151.92	1994.6	1598.29	1425.3	1	0.732511	0.67896	0.544058	0.48517											4213.99	5284.6	2478.2	1936.8	1373.5
b1711	btuc, eck1709, jw1701	vitamin b12 transporter subunit: membrane component of abc	0.106	0.117	0.2	0.274	0.367	0.147164	0.128786	0.174527	0.193678	0.215293	1	0.87512	1.18594	1.31607	1.46295
b1712	ihfa, eck1710, hid, hima, jw1702	integration host factor (ihf), dna-binding protein, alpha subunit	1.045	1.437	1.857	2.196	3.167	1.45493	1.58493	1.62151	1.55391	1.85978	1	1.08935	1.11449	1.06802	1.27826	8533	8559.5	9404.5	9006	9377	11755.1	9416.86	7683.07	6183.09	5544.5	1	0.80109	0.653597	0.525994	0.471669											8079.44	5941.51	4738.21	3979.07	2981.27
b1713	phet, eck1711, jw1703	phenylalanine trna synthetase, beta subunit (ec:6,1,1,20)	0.611	1.249	1.438	2.214	3.952	0.851108	1.37666	1.25544	1.56684	2.32051	1	1.61749	1.47507	1.84095	2.72646	436.5	713	1168	1579	2158	601.322	784.417	954.206	1084.07	1276	1	1.30449	1.58685	1.80281	2.12199	0.0215831	0.040278	0.057939	0.0728	0.0857136	1	1.86618	2.68446	3.37301	3.97133	706.517	569.797	760.056	691.88	549.879	1.80062	2.57594
b1714																		472	669.5	1070.5	1369.5	1706	650.227	736.56	874.553	940.234	1008.74	1	1.13277	1.345	1.44601	1.55136
b1716	rplt, eck1714, jw1706, pdza	50s ribosomal subunit protein l20	1.532	1.902	2.789	3.524	5.5	2.13279	2.09761	2.43487	2.49401	3.22976	1	0.983505	1.14164	1.16936	1.51433	5350.5	8048	11031	14675	15771	7370.85	8854.12	9011.86	10075.2	9325.19	1	1.20124	1.22264	1.36689	1.26515	0.556233	1.05669	1.55132	1.99067	2.37954	1	1.89972	2.78898	3.57885	4.27796	3455.96	4221.05	3701.16	4039.74	2887.27	3.78577	5.98709
b1717	rpmi, eck1715, jw1707	50s ribosomal subunit protein l35	2.999	4.134	5.595	7.368	11.96	4.17635	4.55791	4.88511	5.21433	7.02287	1	1.09136	1.16971	1.24854	1.68158	993					1367.96										0.556233	1.05669	1.55132	1.99067	2.37954	1	1.89972	2.78898	3.57885	4.27796	327.548					20.3986
b1718	infc, eck1716, fit, jw5829, srja	protein chain initiation factor if-3	2.92	3.912	4.962	7.642	10.818	4.06646	4.31371	4.33244	5.40846	6.35188	1	1.0608	1.06541	1.33002	1.56202	2279	2873.5	4090	4876	6509	3139.55	3161.32	3341.36	3347.63	3848.69	1	1.00693	1.06428	1.06628	1.22587											772.06	732.854	771.24	618.962	605.913
b1719	thrs, eck1717, jw1709	threonyl-trna synthetase (ec:6,1,1,3)	2.501	2.679	3.997	5.801	8.042	3.4832	2.95447	3.49027	4.10567	4.72211	1	0.848206	1.00203	1.17871	1.35568	724	970.5	1357	1222	1363	997.382	1067.71	1108.61	838.968	805.924	1	1.07051	1.11152	0.84117	0.80804	0.0327204	0.0618576	0.0903154	0.115248	0.137216	1	1.89049	2.76022	3.52221	4.19358	286.341	361.388	317.629	204.344	170.671	1.64578	2.9064
b1722	ydiy, eck1720, jw1711	conserved protein	0.042	0.05	0.255	0.374	0.631	0.0589491	0.0551939	0.222275	0.264646	0.370305	1		3.77063	4.4894	6.28178
b1723	pfkb, eck1721, jw5280	6-phosphofructokinase ii (ec:2,7,1,11)	0.281	0.372	0.802	1.089	1.544	0.391446	0.410643	0.700578	0.770488	0.906386	1	1.04904	1.78972	1.96831	2.31548	419.5	507.5	621	607.5	676	577.903	558.333	507.33	417.081	399.71	1	0.966137	0.877882	0.721714	0.691656	0.631808	1.1976	1.72938	2.09659	2.56566	1	1.89551	2.73719	3.31839	4.06082	1476.33	1359.66	724.16	541.32	440.994	54.8461	107.605
b1724	ydiz, eck1722, jw1713	predicted protein	0.721	0.777	1.118	1.303	2.27	1.00424	0.857103	0.976364	0.922358	1.33302	1	0.853485	0.972243	0.918465	1.3274	141					194.242																				193.422
b1725	ynia, eck1723, jw1714	predicted phosphotransferase/kinase	0.52	0.649	0.625	0.719	0.851	0.724393	0.715313	0.54608	0.508549	0.499836	1	0.987465	0.753845	0.702035	0.690006	402	300	251.5	195	162.5	553.795	330.049	205.465	133.878	96.0842	1	0.595977	0.371012	0.241746	0.173501											764.495	461.405	376.254	263.254	192.231
b1726	ynib, eck1724, jw1715	predicted inner membrane protein	0.142	0.255	0.355	0.477	0.654	0.197898	0.281614	0.309539	0.337427	0.383944	1	1.42303	1.56413	1.70505	1.94011
b1727	ynic, eck1725, jw1716	predicted hydrolase	0.166	0.144	0.564	0.818	0.834	0.23172	0.158465	0.49257	0.578615	0.489793	1	0.683867	2.12571	2.49705	2.11373	248	347.5	487.5	564	608.5	341.645	382.307	398.267	387.216	359.798	1	1.11902	1.16573	1.13339	1.05314											1474.39	2412.56	808.549	669.211	734.593
b1728	ydjm, eck1726, jw5281	predicted inner membrane protein regulated by lexa	0.032	0.049	0.071	0.115	0.146	0.0452159	0.0539649	0.0622946	0.0814967	0.0857622
b1729	ydjn, eck1727, jw1718	predicted transporter	0.308	0.308	1.097	1.83	4.669	0.429018	0.339994	0.958252	1.29528	2.74141	1	0.792495	2.2336	3.01917	6.38996	326	534	708.5	1013.5	1458	449.097	587.488	578.814	695.821	862.097	1	1.30815	1.28884	1.54938	1.91962											1046.8	1727.93	604.031	537.199	314.472
b1730	ydjo, eck1728, jw1719	predicted protein	0.009	0.023	0.05	0.084	0.153	0.0122327	0.0250212	0.0433601	0.0595459	0.090068
b1731	ceda, eck1729, jw1720, ydjp	cell division modulator	0.05	0.065	0.129	0.184	0.238	0.069864	0.0718772	0.112784	0.130216	0.139586	1		1.61434	1.86385	1.99796
b1732	kate, eck1730, jw1721	hydroperoxidase hpii(iii) (catalase) (ec:1,11,1,6)	0.879	0.632	1.265	1.486	2.211	1.22441	0.696422	1.10452	1.05168	1.29822	1	0.56878	0.902079	0.858926	1.06028	2973.5	2989	3873	3854.5	4338	4096.29	3288.39	3164.08	2646.32	2565	1	0.802772	0.772424	0.646028	0.626177											3345.51	4721.84	2864.67	2516.28	1975.79
b1733	chbg, eck1731, jw1722, ydjc	conserved protein	0.058	0.108	0.157	0.214	0.255	0.0803273	0.118726	0.136658	0.151274	0.149984	1	1.47802	1.70126	1.88322	1.86716
b1734	chbf, celf, eck1732, jw1723, ydjd	cryptic phospho-beta-glucosidase, nad(p)-binding (ec:3,2,1,86)	0.037	0.071	0.122	0.158	0.21	0.0520227	0.0777645	0.106198	0.111874	0.123073
b1735	chbr, celd, eck1733, jw1724	dna-binding transcriptional dual regulator	0.041	0.088	0.147	0.201	0.231	0.0565509	0.0971413	0.128426	0.142549	0.135635	1	1.71777	2.27097	2.52073	2.39846
b1736	chba, celc, eck1734, jw1725	n,n'-diacetylchitobiose-specific enzyme iia component of pts	0.18	0.342	0.37	0.498	0.746	0.250849	0.37679	0.32271	0.352467	0.438122	1	1.50206	1.28647	1.4051	1.74656
b1737	chbc, celb, eck1735, jw1726	n,n'-diacetylchitobiose-specific enzyme iic component of pts	0.121	0.162	0.194	0.276	0.394	0.168931	0.179071	0.169036	0.195482	0.231085	1	1.06002	1.00062	1.15717	1.36792
b1738	chbb, cela, eck1736, jw1727	n,n'-diacetylchitobiose-specific enzyme iib component of pts	0.132	0.277	0.267	0.405	0.553	0.183145	0.304913	0.233529	0.286605	0.324738	1	1.66488	1.2751	1.56491	1.77312	244	246	270	232	237	336.134	270.64	220.578	159.28	140.135	1	0.805156	0.656221	0.473859	0.416902											1835.35	887.598	944.545	555.747	431.533
b1739	osme, anr, eck1737, jw1728	dna-binding transcriptional activator	0.696	1.16	1.635	2.017	2.053	0.968707	1.27927	1.42723	1.4276	1.20529	1	1.3206	1.47333	1.47371	1.24422	2965.5	2835	3841	4313	4024.5	4085.27	3118.97	3137.93	2961.1	2379.64	1	0.763466	0.768109	0.724824	0.582491											4217.24	2438.08	2198.62	2074.19	1974.33
b1740	nade, eck1738, efg, jw1729, ntrl	nad synthetase, nh3/glutamine-dependent (ec:6,3,5,1)	0.387	0.565	1.114	1.708	2.601	0.53885	0.623323	0.973071	1.20867	1.52751	1	1.15677	1.80583	2.24305	2.83476	1060	1278	1894.5	1887.5	2562.5	1460.26	1406.01	1547.73	1295.87	1515.17	1	0.962852	1.0599	0.887426	1.03761											2709.95	2255.67	1590.56	1072.15	991.926
b1741	cho, dinm, eck1739, jw1730, sosd, ydjq	endonuclease of nucleotide excision repair (ec:3,1,25,-)	0.06	0.124	0.204	0.269	0.42	0.0834163	0.136638	0.178092	0.190367	0.246866	1	1.63802	2.13497	2.28213	2.95945
b1742	ves, eck1740, jw1731, ydjr	conserved protein	0.272	0.299	0.649	0.905	1.016	0.379093	0.329934	0.56639	0.640272	0.596363	1	0.870327	1.49407	1.68896	1.57313
b1743	spy, eck1741, jw1732	envelope stress induced periplasmic protein	0.147	0.281	0.27	0.286	0.333	0.204583	0.310065	0.235719	0.202095	0.195562	1	1.51559	1.15219	0.987838	0.955903	874					1204.02																				5885.24
b1744	aste, eck1742, jw1733, ydjs	succinylglutamate desuccinylase (ec:3,5,1,-)	0.046	0.105	0.069	0.062	0.075	0.0638074	0.115296	0.0598249	0.0442084	0.0437799	1	1.80694
b1745	astb, eck1743, jw1734, ydjt	succinylarginine dihydrolase (ec:3,5,3,-)	0.069	0.143	0.102	0.108	0.125	0.0960692	0.157244	0.0886383	0.0760835	0.073555	1	1.63678	0.922651
b1746	astd, eck1744, jw5282, ydju	succinylglutamic semialdehyde dehydrogenase (ec:1,2,1,-)	0.131	0.237	0.183	0.208	0.339	0.183024	0.261744	0.15998	0.14706	0.199146	1	1.43011	0.874094	0.803502	1.08809
b1747	asta, eck1745, jw1736, ydjv	arginine succinyltransferase (ec:2,3,1,109)	0.121	0.363	0.159	0.144	0.132	0.167822	0.399847	0.138856	0.10195	0.0775057	1	2.38256	0.8274	0.607487
b1748	astc, argm, cstc, eck1746, jw1737, ydjw	succinylornithine transaminase, plp-dependent (ec:2,6,1,17 2,6,1,11)	0.279	0.722	0.292	0.358	0.332	0.389139	0.796507	0.254653	0.253224	0.195196	1	2.04685	0.654402	0.650729	0.50161	377.5	403.5	235	114	69	520.044	443.916	191.985	78.267	40.7988	1	0.853613	0.369171	0.150501	0.0784527											1336.4	557.329	753.908	309.083	209.015
b1749	xtha, eck1747, jw1738, xth	exonuclease iii (ec:3,1,11,2)	0.171	0.141	0.484	0.638	0.887	0.238137	0.155772	0.422323	0.451403	0.52101	1	0.654128	1.77344	1.89556	2.18786	439.5	565.5	729.5	719	870.5	605.455	622.143	595.97	493.631	514.716	1	1.02756	0.984335	0.815307	0.85013											2542.47	3993.93	1411.17	1093.55	987.918
b1750	ydjx, eck1748, jw1739	predicted inner membrane protein	0.05	0.094	0.118	0.164	0.269	0.069354	0.103765	0.103457	0.116088	0.158241	1	1.49616	1.49172	1.67384	2.28164
b1751	ydjy, eck1749, jw5283	predicted protein	0.021	0.033	0.074	0.095	0.128	0.0293544	0.03606	0.0642128	0.0670614	0.0753527
b1752	ydjz, eck1750, jw1741	conserved inner membrane protein	0.064	0.086	0.126	0.167	0.197	0.0889638	0.0946907	0.110314	0.118487	0.115903	1	1.06437	1.23999	1.33186	1.30281
b1753	ynja, eck1751, jw1742	conserved protein	0.097	0.14	0.194	0.267	0.32	0.13508	0.154543	0.169316	0.18886	0.187661	1	1.14408	1.25345	1.39813	1.38925
b1754	ynjb, eck1752, jw5284	conserved protein	0.076	0.085	0.162	0.22	0.273	0.105575	0.0937045	0.141597	0.155478	0.160394	1	0.887568	1.34121	1.47269	1.51925
b1755	ynjc, eck1753, jw5285	fused transporter subunits of abc superfamily: membrane components	0.03	0.046	0.058	0.081	0.134	0.0418588	0.0502853	0.0510409	0.057137	0.0785821
b1756	ynjd, eck1754, jw5286	predicted transporter subunit: atp-binding component of abc	0.026	0.048	0.083	0.108	0.153	0.0361306	0.0529862	0.0721735	0.0763902	0.090068
b1757	ynje, eck1755, jw5287	predicted thiosulfate sulfur transferase	0.092	0.137	0.221	0.26	0.192	0.128783	0.151599	0.19291	0.184349	0.113029	1	1.17717	1.49794	1.43146	0.877668	117.5	138.5	118.5			161.868	152.373	96.8094			1	0.94134	0.598077													1256.9	1005.1	501.837
b1758	ynjf, eck1756, jw1747	predicted phosphatidyl transferase, inner membrane protein	0.064	0.071	0.136	0.172	0.197	0.0885743	0.0782502	0.118547	0.121501	0.115537	1	0.883442	1.33839	1.37174	1.30441
b1759	nudg, eck1757, jw1748, orf135, ynjg	pyrimidine (deoxy)nucleoside triphosphate pyrophosphohydrolase	0.054	0.068	0.121	0.174	0.214	0.0753511	0.0750637	0.105926	0.122998	0.125591	1	0.996186	1.40577	1.63234	1.66675
b1760	ynjh, eck1758, jw1749	predicted protein	0.102	0.169	0.437	0.56	0.448	0.141467	0.185945	0.381432	0.396368	0.263013	1	1.3144	2.69627	2.80185	1.85919	361					497.313																				3515.41
b1761	gdha, eck1759, jw1750	glutamate dehydrogenase, nadp-specific (ec:1,4,1,4)	0.738	1.849	3.22	4.729	6.621	1.0279	2.0385	2.8111	3.34691	3.88748	1	1.98317	2.73481	3.25608	3.78198	1425.5	4178.5	5559	8206	7482	1963.77	4597.04	4541.47	5633.85	4424.01	1	2.34093	2.31263	2.8689	2.25282	0.0404034	0.0764988	0.111885	0.143024	0.1705	1	1.89337	2.7692	3.5399	4.21993	1910.47	2255.11	1615.55	1683.3	1138.02	1.03215	0.834818
b1762	ynji, eck1760, jw5288	predicted inner membrane protein	0.011	0.033	0.059	0.09	0.163	0.0159523	0.0365531	0.0518642	0.0637593	0.0958056
b1763	topb, eck1761, jw1752, mutr	dna topoisomerase iii (ec:5,99,1,2)	0.074	0.18	0.233	0.345	0.493	0.103326	0.198205	0.203069	0.243895	0.289214	1	1.91825	1.96533	2.36045	2.79906
b1764	seld, eck1762, fdhb, jw1753	selenophosphate synthase (ec:2,7,9,3)	0.452	0.786	1.144	1.516	1.834	0.628712	0.866912	0.998591	1.07273	1.07682	1	1.37887	1.58831	1.70623	1.71274	507	691.5	863.5	847.5	959	698.443	760.764	705.443	581.854	567.044	1	1.08923	1.01002	0.833072	0.811869											1110.91	877.555	706.438	542.405	526.59
b1765	ydja, eck1763, jw1754	predicted oxidoreductase	0.623	1.314	1.669	2.372	3.249	0.867958	1.44878	1.45714	1.67902	1.90786	1	1.66918	1.67881	1.93444	2.1981	1235	2400	2348	2482	2421.5	1701.34	2640.39	1918.22	1704.02	1431.8	1	1.55195	1.12748	1.00158	0.841575											1960.16	1822.49	1316.43	1014.9	750.477
b1766	sppa, eck1764, jw1755	protease iv (signal peptide peptidase) (ec:3,4,-,-)	0.082	0.133	0.267	0.36	0.65	0.114481	0.147184	0.233249	0.254721	0.381425	1	1.28566	2.03745	2.22501	3.33178
b1767	ansa, eck1765, jw1756	cytoplasmic l-asparaginase i (ec:3,5,1,1)	0.177	0.095	0.477	0.717	1.184	0.246682	0.104258	0.416288	0.50734	0.695398	1	0.422639	1.68755	2.05665	2.819	292.5	301	345	586	459	402.948	331.149	281.85	402.32	271.401	1	0.821817	0.699471	0.998442	0.673538											1633.47	3176.26	677.056	792.998	390.281
b1768	pnca, eck1766, jw1757, nam, ydjb	nicotinamidase/pyrazinamidase (ec:3,5,1,19 3,5,1,-)	0.192	0.24	0.515	0.747	1.242	0.267882	0.265174	0.449761	0.528696	0.72949	1	0.989891	1.67895	1.97362	2.72318	163	176	211	253	273	224.549	193.629	172.378	173.698	161.421	1	0.862302	0.767664	0.773542	0.71887											838.238	730.197	383.266	328.54	221.28
b1769	ydje, eck1767, jw1758	predicted transporter	0.024	0.068	0.072	0.126	0.139	0.0333439	0.0750637	0.062838	0.0893189	0.0814563
b1770	ydjf, eck1768, jw1759	predicted dna-binding transcriptional regulator	0.048	0.079	0.158	0.189	0.276	0.0669855	0.0875743	0.138033	0.133527	0.162191	1	1.30736	2.06064	1.99338	2.42129
b1771	ydjg, eck1769, jw1760	predicted oxidoreductase	0.02	0.051	0.087	0.108	0.141	0.0275266	0.0561727	0.0760098	0.076688	0.082888
b1772	ydjh, eck1770, jw5289	predicted kinase	0.046	0.091	0.11	0.164	0.216	0.0642572	0.0998421	0.0960475	0.116385	0.126668	1	1.55379	1.49474	1.81124	1.97126
b1773	ydji, eck1771, jw1762	predicted aldolase	0.031	0.054	0.078	0.097	0.122	0.0434177	0.0593666	0.0680573	0.0688658	0.0714021
b1774	ydjj, eck1772, jw1763	predicted oxidoreductase, zn-dependent and nad(p)-binding	0.033	0.052	0.068	0.091	0.111	0.0464761	0.0574017	0.0592733	0.064057	0.0649433
b1775	ydjk, eck1773, jw5290	predicted transporter	0.017	0.03	0.036	0.047	0.051	0.0235075	0.0328735	0.0310115	0.0330841	0.0297859
b1776	ydjl, eck1774, jw1765	predicted oxidoreductase, zn-dependent and nad(p)-binding	0.027	0.035	0.061	0.071	0.067	0.0375708	0.0390037	0.0529591	0.0499193	0.0394741
b1777	yeac, eck1775, jw1766	conserved protein	1.392	1.897	2.303	3.002	3.26	1.93849	2.09172	2.01118	2.12441	1.91431	1	1.07905	1.0375	1.09591	0.987527	144					198.374																				102.334
b1778	msrb, eck1776, jw1767, yeaa	methionine sulfoxide reductase b (ec:1,8,4,12)	1.366	2.04	2.314	2.904	3.874	1.90257	2.24897	2.02023	2.05553	2.27493	1	1.18207	1.06184	1.0804	1.19571	1349	2076	1877	1592	1706	1858.38	2283.94	1533.43	1092.99	1008.74	1	1.22899	0.825142	0.588142	0.542803											976.774	1015.55	759.036	531.731	443.414
b1779	gapa, eck1777, jw1768	glyceraldehyde-3-phosphate dehydrogenase a (ec:1,2,1,12)	1.716	3.283	7.422	11.971	13.547	2.38949	3.61949	6.48028	8.47176	7.95437	1	1.51476	2.712	3.54543	3.3289	11721.5	20150	29352.5	40505	31313	16147.5	22168.3	23979.7	27808.8	18515	1	1.37286	1.48504	1.72217	1.14661	2.53004	4.83558	7.08702	8.72597	10.7778	1	1.91126	2.80115	3.44895	4.25994	6757.74	6124.7	3700.42	3282.53	2327.65	7.86025	10.9429
b1780	yead, eck1778, jw1769, yzzq	conserved protein	0.138	0.265	0.809	1.359	1.391	0.19211	0.29216	0.706341	0.961757	0.817039	1	1.5208	3.67676	5.0063	4.25298	167.5	293	365	725	629	230.748	322.348	298.189	497.751	371.92	1	1.39697	1.29227	2.15712	1.6118											1201.13	1103.33	422.161	517.543	455.204
b1781	yeae, eck1779, jw1770	predicted oxidoreductase	0.077	0.199		0.279	0.386	0.107153	0.219061		0.197584	0.226779	1	2.04438		1.84395	2.11641
b1782	mipa, eck1780, jw1771, yeaf	scaffolding protein for murein synthesizing machinery	0.405	0.365	1.896	2.837	3.963	0.563527	0.40279	1.65554	2.00772	2.32697	1	0.714766	2.93781	3.56277	4.12929	134	137	223	350	350	184.598	150.722	182.181	240.293	206.951	1	0.816489	0.986907	1.30171	1.12109											327.577	374.196	110.044	119.685	88.9357
b1783	yeag, eck1781, jw1772	conserved protein with nucleoside triphosphate hydrolase domain	1.606	1.621	1.446	1.877	1.987	2.236	1.7873	1.26258	1.32866	1.16689	1	0.799332	0.564661	0.594214	0.521866	1181	1289	1722	1511.5	1773	1626.95	1418.11	1406.8	1037.72	1048.35	1	0.871641	0.864688	0.637836	0.644369											727.615	793.436	1114.23	781.031	898.415
b1784	yeah, eck1782, jw1773	conserved protein	0.243	0.255	0.371	0.439	0.513	0.338764	0.280878	0.324085	0.310361	0.301411	1	0.829126	0.95667	0.916156	0.889737
b1785	yeai, eck1783, jw1774	predicted diguanylate cyclase	0.052	0.141	0.141	0.226	0.295	0.0721434	0.156015	0.122935	0.159691	0.172956	1	2.16256	1.70403	2.21353	2.39739
b1786	yeaj, eck1784, jw5291	predicted diguanylate cyclase	0.029	0.044	0.135	0.172	0.23	0.0396991	0.0488135	0.117995	0.121501	0.13528
b1787	yeak, eck1785, jw1776	conserved protein	0.119	0.2	0.52	0.66	0.894	0.165693	0.220283	0.453606	0.466741	0.524961	1	1.32946	2.73763	2.8169	3.16827	88	137	201	229	267	121.229	150.722	164.208	157.221	157.874	1	1.24329	1.35453	1.29689	1.30228											731.647	684.223	362.007	336.848	300.734
b1788	yoai, eck4472	predicted protein	0.016	0.025	0.056	0.066	0.081	0.0223984	0.0279649	0.0485712	0.046915	0.0473646
b1789	yeal, eck1787, jw1778	conserved inner membrane protein	0.052	0.075	0.113	0.142	0.207	0.0723818	0.0821801	0.0990606	0.100145	0.121641	1	1.13537	1.36858	1.38357	1.68054
b1790	yeam, eck1788, jw1779	predicted dna-binding transcriptional regulator	0.045	0.077	0.143	0.193	0.25	0.0630581	0.0843878	0.125133	0.136532	0.146755	1	1.33825	1.9844	2.16517	2.32729
b1791	yean, eck1789, jw1780	predicted transporter	0.029	0.039	0.058	0.077	0.112	0.0402694	0.0429261	0.0504894	0.0547372	0.0656645
b1792	yeao, eck1790, jw1781	conserved protein	0.096	0.162	0.257	0.339	0.457	0.133551	0.178335	0.224745	0.239988	0.268396	1	1.33534	1.68284	1.79698	2.00969	277.5	285	366	342.5	408	382.284	313.547	299.006	235.144	241.245	1	0.820194	0.782158	0.615104	0.631063											2862.46	1758.19	1330.43	979.816	898.842
b1793	yoaf, eck1791, jw1782	conserved outer membrane protein	0.116	0.184	0.233	0.342	0.467	0.162036	0.203356	0.203069	0.24209	0.274499	1	1.255	1.25323	1.49405	1.69406
b1794	yeap, eck1792, jw5292	predicted diguanylate cyclase	0.081	0.121	0.355	0.463	0.725	0.112982	0.133937	0.31009	0.327503	0.425926	1	1.18547	2.74459	2.89871	3.76985
b1795	yeaq, eck1793, jw1784	conserved inner membrane protein	0.221	0.413	1.271	1.718	4.342	0.308181	0.455041	1.10973	1.21558	2.5498	1	1.47654	3.6009	3.94436	8.2737
b1796	yoag, eck1794, jw1785	predicted protein	0.022	0.049	0.058	0.075	0.123	0.0310788	0.0537221	0.0502177	0.0532305	0.0721233
b1797	year, eck1795, jw1786	conserved protein	0.026	0.036	0.052	0.062	0.077	0.0361306	0.0399825	0.0455499	0.0439106	0.0452116
b1798	leue, eck1796, jw1787, yeas	neutral amino-acid efflux system	0.082	0.182	0.176	0.244	0.343	0.11409	0.200663	0.153946	0.17262	0.201299	1	1.75881	1.34933	1.51301	1.76439
b1799	yeat, eck1797, jw1788	predicted dna-binding transcriptional regulator	0.098	0.294	0.215	0.263	0.2	0.136009	0.324297	0.187971	0.186153	0.117335	1	2.38438	1.38204	1.36868	0.862698
b1800	yeau, eck1798, jw1789	predicted dehydrogenase	0.064	0.091	0.113	0.179	0.2	0.0893533	0.100328	0.0987889	0.126914	0.117335	1	1.12282	1.1056	1.42036	1.31316
b1801	yeav, eck1799, jw5293	predicted transporter	0.02	0.025	0.028	0.038	0.043	0.027586	0.027229	0.0246972	0.0267686	0.025114
b1802	yeaw, eck1800, jw5294	predicted 2fe-2s cluster-containing protein	0.036	0.078	0.088	0.119	0.119	0.0508227	0.0856094	0.0765614	0.0839056	0.0699704
b1803	yeax, eck1801, jw1792	predicted oxidoreductase	0.038	0.062	0.089	0.118	0.143	0.0531327	0.0684405	0.0773846	0.0836079	0.0839645
b1804	rnd, eck1802, jw1793	ribonuclease d (ec:3,1,26,3)	0.06	0.113	0.207	0.263	0.377	0.0835063	0.125106	0.180561	0.185856	0.221397	1	1.49816	2.16225	2.22565	2.65126
b1805	fadd, eck1803, jw1794, oldd	acyl-coa synthetase (long-chain-fatty-acid--coa ligase) (ec:6,2,1,3)	0.126	0.653	0.247	0.221	0.201	0.175648	0.720465	0.215689	0.156083	0.118056	1	4.10175	1.22796	0.888609	0.672118	160.5	166	161.5	100.5	72	221.105	182.627	131.939	68.9986	42.5727	1	0.825976	0.596724	0.312063	0.192545											1258.79	253.485	611.707	442.065	360.614
b1806	yeay, eck1804, jw1795	predicted lipoprotein	0.194	0.236	0.285	0.377	0.6	0.270339	0.260022	0.24917	0.267055	0.35236	1	0.961837	0.921695	0.98785	1.3034
b1807	yeaz, eck1805, jw1796	predicted peptidase	0.407	0.461	0.689	1.036	1.365	0.567065	0.50852	0.601517	0.732893	0.801613	1	0.896757	1.06076	1.29243	1.41362
b1808	yoaa, eck1806, jw1797	conserved protein with nucleoside triphosphate hydrolase domain	0.065	0.07	0.129	0.173	0.248	0.0908537	0.0775143	0.112232	0.122403	0.145678	1	0.853178	1.23531	1.34725	1.60344
b1809	yoab, eck1807, jw5295	conserved protein	0.383	0.39	1.179	1.607	2.142	0.533541	0.43027	1.02932	1.13739	1.25804	1	0.806441	1.92923	2.13178	2.3579	900	1146	1454	1687	1908	1239.84	1260.79	1187.86	1158.21	1128.18	1	1.0169	0.958072	0.934165	0.909937											2323.79	2930.23	1154.02	1018.31	896.776
b1810	yoac, eck1808, jw5296	predicted protein	0.289	0.234	0.447	0.572	0.846	0.40299	0.25855	0.390488	0.404795	0.496607	1	0.641581	0.968977	1.00448	1.23231
b1811	yoah, eck1809, jw1800	conserved protein	0.144	0.172	0.36	0.502	0.699	0.200596	0.189131	0.314066	0.35502	0.410672	1	0.942847	1.56567	1.76983	2.04726
b1812	pabb, eck1810, jw1801	aminodeoxychorismate synthase, subunit i (ec:2,6,1,85)	0.082	0.093	0.249	0.374	0.629	0.11406	0.103029	0.217607	0.264952	0.369584	1	0.903286	1.90783	2.32292	3.24026
b1813	nudl, eck1811, jw1802, yeab	predicted nudix hydrolase	0.093	0.117	0.231	0.275	0.384	0.129982	0.128786	0.201966	0.19458	0.225703	1	0.990794	1.55379	1.49697	1.73641
b1814	sdaa, eck1812, jw1803	l-serine deaminase i (ec:4,3,1,17)	0.102	0.18	0.201	0.289	0.405	0.141406	0.198941	0.175622	0.204197	0.237899	1	1.40688	1.24197	1.44406	1.68239
b1815	adrb, eck1813, jw1804, yoad	predicted phosphodiesterase	0.058	0.068	0.111	0.129	0.164	0.0805378	0.0753066	0.0971424	0.0911233	0.0961608	1	0.935046	1.20617	1.13144
b1816	yoae, borg, eck1814, jw1805	fused predicted membrane protein/conserved protein	0.043	0.127	0.173	0.23	0.249	0.0602093	0.140318	0.151476	0.162696	0.146044	1	2.3305	2.51583	2.70217	2.42561
b1817	manx, eck1815, gptb, jw1806, mpt, ptsl, ptsx	fused mannose-specific pts enzymes: iia component/iib component	1.019	3.5	5.674	7.637	2.885	1.41859	3.85965	4.95371	5.40485	1.694	1	2.72076	3.49199	3.81001	1.19414	4988	8626	15361.5	13491	8289	6871.47	9490.02	12549.7	9262.28	4901.18	1	1.38108	1.82635	1.34793	0.713265	1.47247	2.82748	4.1892	5.24371	6.48853	1	1.92023	2.84502	3.56117	4.40657	4843.86	2458.78	2533.39	1713.7	2893.25	10.7501	14.9468
b1818	many, eck1816, jw1807, pel, ptsp, ptsx	mannose-specific enzyme iic component of pts	1.31	5.13	6.842	9.242	4.061	1.8241	5.65651	5.97371	6.54043	2.38438	1	3.10099	3.27488	3.58556	1.30715	825	1408	2340	1998	847.5	1136.52	1549.03	1911.68	1371.73	501.116	1	1.36296	1.68205	1.20696	0.440921	1.47247	2.82748	4.1892	5.24371	6.48853	1	1.92023	2.84502	3.56117	4.40657	623.057	273.849	320.016	209.731	210.167	64.9956	91.5704
b1819	manz, eck1817, gptb, jw1808, mpt, ptsm, ptsx	mannose-specific enzyme iid component of pts	0.741	2.904	4.345	5.422	1.989	1.03161	3.20149	3.79349	3.8371	1.16797	1	3.10338	3.67724	3.71951	1.13217	1079.5	1724	2323.5	2941.5	1287	1487.12	1896.68	1898.2	2019.5	760.987	1	1.27541	1.27643	1.35799	0.511719	1.47247	2.82748	4.1892	5.24371	6.48853	1	1.92023	2.84502	3.56117	4.40657	1441.55	592.438	500.383	526.307	651.548	49.6724	74.786
b1820	yobd, eck1818, jw1809	conserved inner membrane protein	0.133	0.416	0.611	0.887	0.425	0.185753	0.458477	0.533732	0.627641	0.24974	1	2.46822	2.87335	3.37891	1.34448
b1821	yebn, eck1819, jw5830	conserved inner membrane protein	0.042	0.04	0.129	0.192	0.21	0.0579596	0.044398	0.113056	0.135936	0.123073	1		1.9506	2.34536	2.12342
b1822	rlma, eck1820, jw1811, rrma, yebh	23s rrna m(1)g745 methyltransferase (ec:2,1,1,51)	0.075	0.099	0.235	0.321	0.64	0.104494	0.109159	0.205259	0.22706	0.376042	1	1.04464	1.96431	2.17294	3.59869
b1823	cspc, eck1821, jw1812, msmb	stress protein, member of the cspa-family	2.643	4.181	6.129	9.061	13.654	3.67984	4.61029	5.35107	6.41262	8.01753	1	1.25285	1.45416	1.74264	2.17877	14958.5	20813.5	33157	36549.5	39680	20606.8	22898.3	27087.9	25093.2	23462.3	1	1.1112	1.31451	1.21771	1.13857											5599.93	4966.78	5062.14	3913.09	2926.37
b1824	yobf, eck1822, jw1813	predicted protein	2.1	3.948	5.857	8.381	11.594	2.92402	4.3537	5.11397	5.93114	6.80758	1	1.48894	1.74895	2.02842	2.32816
b1825	yebo, eck1823, jw1814	predicted protein	0.064	0.133	0.207	0.292	0.538	0.0893533	0.146691	0.181113	0.206606	0.31576	1	1.64169	2.02693	2.31224	3.53384
b1826	mgrb, eck1824, jw1815, yobg	predicted protein	0.082	0.211	0.248	0.373	0.599	0.114331	0.232918	0.216512	0.263897	0.351467	1	2.03724	1.89374	2.30819	3.07413
b1827	kdgr, eck1826, jw1816, yebp	predicted dna-binding transcriptional regulator	0.712	0.795	1.219	1.609	2.217	0.991045	0.876722	1.06445	1.13859	1.3018	1	0.884644	1.07407	1.14888	1.31357	464	583.5	683.5	622	706.5	639.206	641.946	558.39	427.036	417.744	1	1.00429	0.873568	0.668072	0.653536											644.982	732.211	524.581	375.057	320.896
b1828	yebq, eck1827, jw5299	predicted transporter	0.048	0.076	0.113	0.155	0.234	0.067375	0.0841376	0.0987889	0.109772	0.137433	1	1.2488	1.46625	1.62927	2.03982
b1829	htpx, eck1828, jw1818	predicted endopeptidase	0.263	0.507	0.908	1.123	1.333	0.36629	0.558562	0.793053	0.794848	0.782947	1	1.52492	2.1651	2.17	2.13751
b1830	prc, eck1829, jw1819, tsp	carboxy-terminal protease for penicillin-binding protein 3	0.152	0.437	0.552	0.761	1.387	0.2119	0.481534	0.481868	0.538322	0.814165	1	2.27246	2.27403	2.54045	3.84221	429.5	559.5	745.5	800.5	937.5	591.679	615.542	609.042	549.586	554.332	1	1.04033	1.02934	0.928858	0.936879											2792.25	1278.29	1263.92	1020.92	680.86
b1831	proq, eck1830, jw5300, yebj, yobe, yoec	predicted structural transport element	1.054	1.022	2.573	3.827	5.805	1.46762	1.12645	2.24662	2.70874	3.40845	1	0.767536	1.5308	1.84567	2.32244	537.5	736.5	1238.5	1430	1940.5	740.46	810.271	1011.8	981.771	1147.39	1	1.09428	1.36645	1.32589	1.54957											504.532	719.314	450.365	362.446	336.632
b1832	yebr, eck1831, jw1821	free methionine-(r)-sulfoxide reductase	0.326	0.306	1.088	1.419	2.279	0.453454	0.337051	0.95002	1.00416	1.33805	1	0.743296	2.09507	2.21447	2.95079	353	453	628.5	802	1024.5	486.293	498.374	513.458	550.615	605.774	1	1.02484	1.05586	1.13227	1.2457											1072.42	1478.63	540.47	548.334	452.729
b1833	yebs, eck1832, jw1822	conserved inner membrane protein	0.102	0.236	0.228	0.319	0.455	0.142726	0.260272	0.199496	0.225553	0.266964	1	1.82358	1.39775	1.58032	1.87046
b1834	yebt, eck1833, jw1823	conserved protein	0.113	0.173	0.215	0.308	0.427	0.158018	0.190603	0.187699	0.218037	0.250817	1	1.20621	1.18783	1.37982	1.58727
b1835	rsmf, eck1834, jw5301, yebu	16s rrna m(5)c1407 methyltransferase, sam-dependent	0.049	0.068	0.169	0.231	0.396	0.0688448	0.0750637	0.14736	0.1633	0.232517	1	1.09033	2.14047	2.372	3.37741
b1836	yebv, eck1835, jw5302	predicted protein	1.865	1.578	1.207	1.202	1.966	2.5974	1.74045	1.05402	0.850785	1.15433	1	0.670073	0.405798	0.327553	0.444417	3178	1801	1929	1616	2015	4378.01	1981.4	1575.91	1109.47	1191.44	1	0.452579	0.35996	0.253419	0.272143											1685.54	1138.44	1495.14	1304.05	1032.15
b1837	yebw, eck1836, jw5303	predicted protein	0.303	0.527	0.38	0.464	0.576	0.42242	0.580883	0.331494	0.328703	0.338366	1	1.37513	0.78475	0.778141	0.801017
b1838	ppha, eck1837, jw1827, prpa, yebx	serine/threonine-specific protein phosphatase 1 (ec:3,1,3,16)	0.051	0.131	0.115	0.14	0.2	0.071332	0.14424	0.100707	0.0989455	0.117335	1	2.02209	1.41181	1.38711	1.64491
b1839	yeby, eck1840, jw1828	predicted protein	0.18	0.269	0.485	0.857	1.568	0.24998	0.296818	0.423417	0.606286	0.920735	1	1.18737	1.6938	2.42534	3.68323	176					242.458																				969.907
b1840	yebz, eck1841, jw1829	predicted inner membrane protein	0.128	0.223	0.341	0.651	1.211	0.177658	0.24604	0.298013	0.460732	0.710824	1	1.38491	1.67746	2.59337	4.00109
b1841	yoba, eck1842, jw1830	conserved protein	0.081	0.211	0.322	0.614	1.42	0.112172	0.232307	0.280725	0.434261	0.833907	1	2.071	2.50264	3.8714	7.4342
b1842	hole, eck1843, jw1831	dna polymerase iii, theta subunit (ec:2,7,7,7)	0.146	0.143	0.439	0.713	0.971	0.203624	0.15798	0.383359	0.504634	0.570172	1	0.775838	1.88267	2.47826	2.80012
b1843	yobb, eck1844, jw1832	conserved protein	0.089	0.06	0.228	0.311	0.321	0.123535	0.0662327	0.198953	0.22014	0.188737	1		1.61049	1.78199	1.5278
b1844	exox, eck1845, jw1833, yobc	dna exonuclease x (ec:3,1,11,-)	0.18	0.148	0.436	0.515	0.582	0.25094	0.163374	0.380889	0.364493	0.341595	1	0.651048	1.51785	1.45251	1.36126
b1845	ptrb, eck1846, jw1834, opdb, tlp	protease ii (ec:3,4,21,83)	0.072	0.15	0.198	0.271	0.378	0.0998184	0.165825	0.173152	0.191567	0.222108	1	1.66126	1.73467	1.91915	2.22512
b1846	yebe, eck1847, jw1835	conserved protein	0.375	0.667	0.641	1.24	1.47	0.521788	0.735426	0.559252	0.877247	0.862972	1	1.40943	1.0718	1.68123	1.65387	48	45.5	42.5	49	41	66.1248	50.0575	34.7207	33.6411	24.2428	1	0.757015	0.525078	0.508752	0.366622											126.727	68.066	62.0841	38.3485	28.0922
b1847	yebf, eck1848, jw1836	predicted protein	0.425	0.439	0.765	0.943	1.468	0.592403	0.484477	0.6682	0.667636	0.86225	1	0.817817	1.12795	1.127	1.45551	1720	1379	3082.5	4036.5	4905.5	2369.47	1517.13	2518.27	2771.27	2900.56	1	0.640281	1.0628	1.16957	1.22414											3999.76	3131.47	3768.74	4150.87	3363.94
b1848	yebg, eck1849, jw1837	conserved protein regulated by lexa	0.14	0.303	0.451	0.614	0.91	0.194689	0.333614	0.393509	0.434866	0.534283	1	1.71358	2.02122	2.23365	2.7443
b1849	purt, eck1850, jw1838	phosphoribosylglycinamide formyltransferase 2 (ec:2,7,2,1)	0.099	0.106	0.4	0.631	1.188	0.137178	0.117254	0.349606	0.446297	0.697551	1	0.854759	2.54856	3.25342	5.08501	247.5	286	412	810	960	340.956	314.647	336.586	556.108	567.636	1	0.922838	0.987185	1.63103	1.66484	0.0219918	0.0473323	0.0786433	0.112794	0.14486	1	2.15227	3.57602	5.12889	6.58699	2485.5	2683.47	962.76	1246.05	813.755	3.23577	7.54657
b1850	eda, eck1851, hga, jw1839, kdga, kga	multifunctional 2-keto-3-deoxygluconate 6-phosphate aldolase and	0.251	0.297	0.784	1.144	1.687	0.349888	0.327727	0.684385	0.809888	0.990705	1	0.936661	1.95601	2.3147	2.83149	1954.5	2312	3190.5	3624.5	5133	2692.52	2543.58	2606.5	2488.41	3035.08	1	0.944684	0.968054	0.924195	1.12723											7695.36	7761.28	3808.53	3072.54	3063.55
b1851	edd, eck1852, jw1840	6-phosphogluconate dehydratase (ec:4,2,1,12)	0.125	0.168	0.355	0.474	0.743	0.174539	0.184958	0.309539	0.335325	0.436325	1	1.0597	1.77346	1.9212	2.49987
b1852	zwf, eck1853, jw1841	glucose-6-phosphate dehydrogenase (ec:1,1,1,49)	0.321	0.51	0.925	1.259	2.066	0.447668	0.562242	0.807871	0.891087	1.21318	1	1.25594	1.80462	1.99051	2.71	985	1202	1459	1597	1823	1356.94	1322.4	1191.94	1096.42	1077.92	1	0.974547	0.878406	0.808015	0.794376	0.195283	0.49836	1.0544	1.73579	2.4166	1	2.55198	5.39935	8.88855	12.3748	3031.12	2352.01	1475.41	1230.44	888.506	7.21974	18.9059
b1853	yebk, eck1854, hexr, jw1842	predicted dna-binding transcriptional regulator	0.202	0.197	0.55	0.652	0.394	0.281314	0.217339	0.480501	0.461634	0.23144	1	0.772584	1.70806	1.64099	0.822711	48	63	77	63		66.1248	69.3103	62.9057	43.2528		1	1.04818	0.951318	0.654109												235.057	318.904	130.917	93.695
b1854	pyka, eck1855, jw1843	pyruvate kinase ii (ec:2,7,1,40)	0.323	0.493	0.9	1.21	1.138	0.449555	0.544087	0.785643	0.856496	0.668486	1	1.21028	1.7476	1.90521	1.487	1656	1995	2933.5	2785	2606	2281.3	2194.83	2396.54	1912.05	1540.89	1	0.962093	1.05051	0.838139	0.675444	0.540559	0.80215	0.740911	0.62586	0.602945	1	1.48393	1.37064	1.1578	1.11541	5074.59	4033.97	3050.42	2232.41	2305.05	11.8871	18.3345
b1855	lpxm, eck1856, jw1844, mlt, msbb, waan	myristoyl-acyl carrier protein (acp)-dependent acyltransferase	0.192	0.17	0.452	0.594	0.891	0.267791	0.186923	0.394884	0.420133	0.523163	1	0.69802	1.4746	1.56888	1.95363
b1856	yeba, eck1857, jw5304	predicted peptidase	0.158	0.212	0.275	0.317	0.372	0.220234	0.233529	0.240386	0.224046	0.218523	1	1.06037	1.0915	1.01731	0.992229
b1857	znua, eck1858, jw5831, yebl, yzzp	zinc transporter subunit: periplasmic-binding component of abc	0.157	0.146	0.362	0.493	0.721	0.219307	0.161166	0.316396	0.348551	0.423407	1	0.734889	1.44271	1.58933	1.93066
b1858	znuc, eck1859, jw1847, yebm	zinc transporter subunit: atp-binding component of abc superfamily	0.095	0.144		0.367	0.537	0.132195	0.158465		0.259837	0.315405	1	1.19873		1.96556	2.38591
b1859	znub, eck1860, jw1848, yebi	zinc transporter subunit: membrane component of abc superfamily	0.262	0.489	0.52	0.801	1.084	0.365091	0.538693	0.454157	0.566589	0.636547	1	1.4755	1.24395	1.55191	1.74353
b1860	ruvb, eck1861, jw1849	atp-dependent dna helicase, component of ruvabc resolvasome	0.143	0.158	0.37	0.459	0.508	0.199246	0.174656	0.323262	0.324498	0.298537	1	0.876581	1.62242	1.62863	1.49833
b1861	ruva, eck1862, jw1850	component of ruvabc resolvasome, regulatory subunit (ec:3,1,22,4)	0.222	0.312	0.542	0.756	1.017	0.30917	0.34441	0.473363	0.535309	0.597084	1	1.11398	1.53108	1.73144	1.93125	182					250.723																				810.955
b1862	yebb, eck1863, jw5306	predicted protein	0.025	0.026	0.043	0.062	0.078	0.0341831	0.0287008	0.0378691	0.0436039	0.0459329
b1863	ruvc, eck1864, jw1852	component of ruvabc resolvasome, endonuclease (ec:3,1,22,4)	0.08	0.198	0.317	0.432	0.732	0.111482	0.218568	0.276881	0.305552	0.429866	1	1.96057	2.48364	2.74082	3.85593
b1864	yebc, eck1865, jw1853	conserved protein	0.715	1.091	1.749	2.29	3.792	0.995213	1.20323	1.52738	1.62098	2.22649	1	1.20901	1.53473	1.62877	2.2372	986.5	1299	1724.5	1829.5	2226	1359	1429.11	1408.84	1256.05	1316.21	1	1.05159	1.03667	0.924243	0.968509											1365.54	1187.73	922.39	774.872	591.157
b1865	nudb, eck1866, jw1854, ntpa, orf17, yebd	datp pyrophosphohydrolase (ec:3,6,1,-)	0.343	0.667	0.891	1.414	2.364	0.477053	0.735183	0.777963	1.00085	1.38792	1	1.54109	1.63077	2.09799	2.90937
b1866	asps, eck1867, jw1855, tls	aspartyl-trna synthetase (ec:6,1,1,12)	0.479	0.688	1.274	1.809	3.474	0.667543	0.758489	1.1122	1.28024	2.03991	1	1.13624	1.66611	1.91784	3.05584	1240.5	1495.5	2251.5	2513	2825	1708.91	1645.3	1839.38	1725.31	1670.39	1	0.962774	1.07635	1.00959	0.977456	0.0262786	0.0494802	0.0719138	0.091336	0.10838	1	1.88291	2.7366	3.47569	4.12428	2560	2169.17	1653.82	1347.65	818.855	0.771431	1.5087
b1867	yecd, eck1868, jw5307	predicted hydrolase	0.214	0.213	0.392	0.577	0.781	0.297895	0.235251	0.342468	0.408702	0.458575	1	0.789713	1.14963	1.37197	1.53939	288	337.5	334.5	318	334.5	396.749	371.305	273.272	218.324	197.786	1	0.935871	0.688779	0.550282	0.498516											1331.84	1578.34	797.949	534.189	431.305
b1868	yece, eck1869, jw1857	conserved protein	0.043	0.067	0.134	0.188	0.265	0.0594582	0.0740849	0.116629	0.132923	0.155367	1	1.246	1.96152	2.23557	2.61304
b1869	yecn, eck1870, jw5308	predicted inner membrane protein	0.523	0.674	1.057	1.497	1.929	0.728741	0.743521	0.922581	1.0592	1.13244	1	1.02028	1.26599	1.45346	1.55397
b1870	cmoa, eck1871, jw1859, yeco	trna cmo(5)u34 methyltransferase, sam-dependent	0.138	0.171	0.434	0.631	1.008	0.192649	0.188888	0.378962	0.446595	0.592057	1	0.980478	1.96711	2.31817	3.07324	166	208.5	295.5	324	465.5	228.682	229.384	241.411	222.443	275.244	1	1.00307	1.05566	0.97272	1.20361											1187.04	1214.39	637.031	498.087	464.895
b1871	cmob, eck1872, jw1860, yecp	trna mo(5)u34 methyltransferase, sam-dependent	0.099	0.152	0.327	0.456	0.813	0.137779	0.167789	0.285393	0.322694	0.477596	1	1.21782	2.07139	2.34212	3.4664
b1872	torz, bisz, eck1873, jw1861	trimethylamine n-oxide reductase system iii, catalytic subunit	0.062	0.102	0.123	0.191	0.24	0.0865953	0.112596	0.107573	0.135034	0.141017	1	1.30025	1.24225	1.55937	1.62846
b1873	tory, eck1874, jw1862, yeck	tmao reductase iii (toryz), cytochrome c-type subunit	0.122	0.186	0.189	0.295	0.458	0.169621	0.204828	0.164648	0.208709	0.268762	1	1.20756	0.970681	1.23044	1.58448
b1874	cutc, eck1875, jw1863	copper homeostasis protein	0.153	0.241	0.332	0.498	0.65	0.21352	0.26616	0.289509	0.35216	0.381791	1	1.24653	1.35589	1.64931	1.78808
b1875	yecm, eck1876, jw5309, yecl	predicted metal-binding enzyme	0.193	0.237	0.406	0.545	0.808	0.26929	0.261744	0.354545	0.385542	0.474367	1	0.971978	1.31659	1.4317	1.76154
b1876	args, eck1877, jw1865, lov	arginyl-trna synthetase (ec:6,1,1,19)	0.216	0.171	0.667	0.962	1.527	0.300533	0.188395	0.582031	0.681169	0.896342	1	0.626871	1.93666	2.26654	2.98251	383	508.5	628	733	959.5	527.621	559.433	513.049	503.243	567.34	1	1.06029	0.972383	0.953797	1.07528	0.0307784	0.0594468	0.0888832	0.116144	0.140596	1	1.93144	2.88784	3.77355	4.568	1755.62	2969.47	881.48	738.793	632.95	2.92644	5.33084
b1877	yect, eck1878, jw5310	predicted protein	0.007	0.011	0.037	0.047	0.077	0.00998571	0.0125106	0.0323781	0.0330841	0.0452116
b1878	flhe, eck1879, jw1867	conserved protein	0.078	0.183	0.201	0.273	0.324	0.108273	0.201642	0.175902	0.193371	0.190535	1	1.86234	1.62461	1.78596	1.75976
b1879	flha, eck1880, flah, jw1868	predicted flagellar export pore protein	0.154	0.322	0.326	0.436	0.401	0.214208	0.355206	0.284841	0.308854	0.235391	1	1.65823	1.32974	1.44184	1.09889
b1880	flhb, eck1881, flag, jw1869, yecq	predicted flagellar export pore protein	0.16	0.277	0.364	0.496	0.461	0.222573	0.305649	0.317499	0.35096	0.270549	1	1.37325	1.42649	1.57683	1.21555
b1881	chez, eck1882, jw1870	chemotaxis regulator, protein phosphatase for chey	0.327	1.238	1.516	1.8	1.715	0.455195	1.36464	1.3235	1.27422	1.00722	1	2.99792	2.90754	2.79928	2.21272	496					683.289																				1501.09
b1882	chey, eck1883, jw1871	chemotaxis regulator transmitting signal to flagellar motor	0.375	1.604	1.811	2.268	2.555	0.522479	1.76841	1.58145	1.60503	1.50024	1	3.38466	3.02681	3.07196	2.87139	1887					2599.53																				4975.38
b1883	cheb, eck1884, jw1872	fused chemotaxis regulator: protein-glutamate methylesterase in	0.4	1.21	1.247	1.77	2.02	0.5566	1.33422	1.08888	1.25287	1.18627	1	2.39709	1.9563	2.25094	2.13127
b1884	cher, chex, eck1885, jw1873	chemotaxis regulator, protein-glutamate methyltransferase	0.14	0.544	0.519	0.63	0.669	0.194958	0.600267	0.453054	0.44599	0.392911	1	3.07895	2.32385	2.28762	2.01536
b1885	tap, eck1886, jw1874	methyl-accepting protein iv	0.554	1.717	1.571	1.948	1.896	0.772098	1.89376	1.37152	1.37858	1.11342	1	2.45275	1.77635	1.7855	1.44207
b1886	tar, chem, eck1887, jw1875	methyl-accepting chemotaxis protein ii	0.992	1.967	2.461	3.475	3.286	1.38186	2.16851	2.14866	2.45913	1.92938	1	1.56927	1.5549	1.77958	1.39622	711.5					980.162																				709.305
b1887	chew, eck1888, jw1876	purine-binding chemotaxis protein	0.498	1.207	1.769	2.276	2.474	0.69402	1.33054	1.5444	1.61074	1.45288	1	1.91715	2.2253	2.32089	2.09342	956.5					1317.67																				1898.61
b1888	chea, eck1889, jw1877	fused chemotactic sensory histidine kinase in two-component	0.548	1.284	1.454	2.535	2.604	0.762685	1.41591	1.26944	1.79389	1.5293	1	1.85648	1.66443	2.35208	2.00516	286.5					394.682																				517.491
b1889	motb, eck1890, flaj, jw1878	protein that enables flagellar motor rotation	0.33	1.191	0.965	1.252	1.104	0.459061	1.31337	0.842727	0.886269	0.648389	1	2.861	1.83576	1.93061	1.41242
b1890	mota, eck1891, flaj, jw1879	proton conductor component of flagella motor	0.352	1.086	1.036	1.14	1.003	0.489676	1.19734	0.90447	0.806875	0.588828	1	2.44517	1.84708	1.64777	1.20248
b1891	flhc, eck1892, flai, jw1880	dna-binding transcriptional dual regulator with flhd	0.293	0.293	0.62	0.832	0.562	0.408238	0.322575	0.541421	0.589144	0.33012	1	0.790164	1.32624	1.44314	0.808646
b1892	flhd, eck1893, flbb, jw1881	dna-binding transcriptional dual regulator with flhc	0.383	0.343	0.875	1.108	0.822	0.533064	0.378019	0.763696	0.784319	0.482613	1	0.709145	1.43265	1.47134	0.905356
b1895	uspc, eck1894, jw1884, yecg	universal stress protein	0.04	0.124	0.154	0.181	0.254	0.055771	0.136388	0.134188	0.127816	0.148908	1	2.4455	2.40606	2.2918	2.66998
b1896	otsa, eck1895, jw5312, pexa	trehalose-6-phosphate synthase (ec:2,4,1,15)	0.282	0.273	0.552	0.638	0.849	0.392825	0.301234	0.481596	0.451403	0.498404	1	0.766839	1.22598	1.14912	1.26877	455.5	416.5	496.5	452.5	461.5	627.497	458.218	405.619	310.665	272.879	1	0.730232	0.646409	0.495087	0.434869											1597.4	1521.14	842.24	688.221	547.505
b1897	otsb, eck1896, jw1886, otsp	trehalose-6-phosphate phosphatase, biosynthetic (ec:3,1,3,12)	0.6	0.562	0.708	0.844	1.232	0.835816	0.619644	0.618254	0.597562	0.723386	1	0.741364	0.739701	0.714944	0.865485	228	232.5	260.5		95	314.093	255.788	212.817		56.1723	1	0.814372	0.677562		0.17884											375.792	412.799	344.223		77.6519
b1900	arag, eck1898, jw1888	fused l-arabinose transporter subunits of abc superfamily:	0.26	0.308	0.35	0.539	0.744	0.361971	0.339994	0.305422	0.381635	0.436691	1	0.939287	0.843776	1.05433	1.20642
b1901	araf, eck1899, jw1889	l-arabinose transporter subunit	0.232	0.303	0.176	0.141	0.112	0.323652	0.334107	0.153674	0.0998477	0.0660197	1	1.0323	0.474814	0.308504		1480	1320.5	557	177.5	87.5	2038.85	1452.77	455.045	121.863	51.7376	1	0.712543	0.223187	0.0597706	0.0253759											6299.51	4348.21	2961.1	1220.49
b1902	ftnb, eck1900, jw1890, yeci	predicted ferritin-like protein	0.068	0.182	0.263	0.344	0.506	0.0941505	0.201149	0.229413	0.243299	0.297105	1	2.13646	2.43666	2.58415	3.15564
b1904	yecr, eck1903, jw1892	predicted protein	0.077	0.127	0.276	0.362	0.265	0.106565	0.140067	0.24121	0.256526	0.155367	1	1.31439	2.2635	2.40723	1.45795
[truncated: 2,553 more rows]
[truncated: 33 more columns]

## Sheet: Table S3
Table S3. Covariance analysis of control of protein concentrations for genes. All 1,112 genes with quantified mRNA and protein concentrations are divided into groups based on regulation level of their protein concentrations. Count and fraction of genes in a particular group from the total data set is indicated below the group title. Red and blue font indicate increasing and decreasing pm with ris…
[truncated: 630 more rows]

[truncated: 4 more sheets: Table S4, Table S5, Table S6, Table S7]
